# Supplementary material
Source: publisher figshare collection journal article supplement (https://acs.figshare.com/ndownloader/files/7595377)
Supplement: Supplementary file 1 [file 7595377]

 
data_C20H25BO3S 
 
_audit_creation_method            'SHELXL-2014/7'
_shelx_SHELXL_version_number      '2014/7'
_chemical_name_systematic         ?
_chemical_name_common             ?
_chemical_melting_point           ?
_chemical_formula_moiety          'C20 H25 B O3 S' 
_chemical_formula_sum
 'C20 H25 B O3 S' 
_chemical_formula_weight          356.27

loop_
 _atom_type_symbol
 _atom_type_description
 _atom_type_scat_dispersion_real
 _atom_type_scat_dispersion_imag
 _atom_type_scat_source
 'C'  'C'   0.0033   0.0016
 'International Tables Vol C Tables 4.2.6.8 and 6.1.1.4'
 'H'  'H'   0.0000   0.0000
 'International Tables Vol C Tables 4.2.6.8 and 6.1.1.4'
 'B'  'B'   0.0013   0.0007
 'International Tables Vol C Tables 4.2.6.8 and 6.1.1.4'
 'O'  'O'   0.0106   0.0060
 'International Tables Vol C Tables 4.2.6.8 and 6.1.1.4'
 'S'  'S'   0.1246   0.1234
 'International Tables Vol C Tables 4.2.6.8 and 6.1.1.4'
 
_space_group_crystal_system       monoclinic
_space_group_IT_number            4
_space_group_name_H-M_alt         'P 21'
_space_group_name_Hall            'P 2yb'
 
_shelx_space_group_comment
;
The symmetry employed for this shelxl refinement is uniquely defined
by the following loop, which should always be used as a source of
symmetry information in preference to the above space-group names.
They are only intended as comments.
;
 
loop_
 _space_group_symop_operation_xyz
 'x, y, z'
 '-x, y+1/2, -z'
 
_cell_length_a                    10.818(2)
_cell_length_b                    14.500(3)
_cell_length_c                    12.569(3)
_cell_angle_alpha                 90
_cell_angle_beta                  102.765(4)
_cell_angle_gamma                 90
_cell_volume                      1922.8(7)
_cell_formula_units_Z             4
_cell_measurement_temperature     100(2)
_cell_measurement_reflns_used     9944
_cell_measurement_theta_min       2.18
_cell_measurement_theta_max       28.12
 
_exptl_crystal_description        prism
_exptl_crystal_colour             colorless
_exptl_crystal_density_meas       'not measured' 
_exptl_crystal_density_method     none
_exptl_crystal_density_diffrn     1.231          
_exptl_crystal_F_000              760
_exptl_transmission_factor_min    ?
_exptl_transmission_factor_max    ?
_exptl_crystal_size_max           0.600
_exptl_crystal_size_mid           0.400
_exptl_crystal_size_min           0.270
_exptl_absorpt_coefficient_mu     0.183
_shelx_estimated_absorpt_T_min    0.898
_shelx_estimated_absorpt_T_max    0.952
_exptl_absorpt_correction_type    'multi-scan' 
_exptl_absorpt_correction_T_min   0.6986
_exptl_absorpt_correction_T_max   0.7457
_exptl_absorpt_process_details
;
Sheldrick, G.M. (2013). SADABS. Bruker AXS Inc. Madison, WI USA.
;
_exptl_absorpt_special_details    ?
_diffrn_ambient_temperature       100(2)
_diffrn_radiation_wavelength      0.71073
_diffrn_radiation_type            MoK\a
_diffrn_source                    'fine-focus sealed tube'
_diffrn_measurement_device_type   'Bruker Kappa DUO CCD diffractometer'
_diffrn_measurement_method        '\f and \w scans'  
_diffrn_detector_area_resol_mean  ?
_diffrn_reflns_number             44417
_diffrn_reflns_av_unetI/netI      0.0302
_diffrn_reflns_av_R_equivalents   0.0356
_diffrn_reflns_limit_h_min        -13
_diffrn_reflns_limit_h_max        14
_diffrn_reflns_limit_k_min        -19
_diffrn_reflns_limit_k_max        19
_diffrn_reflns_limit_l_min        -16
_diffrn_reflns_limit_l_max        16
_diffrn_reflns_theta_min          1.661
_diffrn_reflns_theta_max          28.330
_diffrn_reflns_theta_full         25.242
_diffrn_measured_fraction_theta_max   0.998
_diffrn_measured_fraction_theta_full  1.000
_diffrn_reflns_Laue_measured_fraction_max    0.998
_diffrn_reflns_Laue_measured_fraction_full   1.000
_diffrn_reflns_point_group_measured_fraction_max   0.997
_diffrn_reflns_point_group_measured_fraction_full  1.000
_reflns_number_total              9584
_reflns_number_gt                 8680
_reflns_threshold_expression      'I > 2\s(I)'
_reflns_Friedel_coverage          0.924
_reflns_Friedel_fraction_max      0.996
_reflns_Friedel_fraction_full     1.000
 
_reflns_special_details
;
 Reflections were merged by SHELXL according to the crystal
 class for the calculation of statistics and refinement.
 
 _reflns_Friedel_fraction is defined as the number of unique
 Friedel pairs measured divided by the number that would be
 possible theoretically, ignoring centric projections and
 systematic absences.
;
 
_computing_data_collection        'APEX2 (Bruker, 2014)'
_computing_cell_refinement        'SAINT (Bruker, 2014)'
_computing_data_reduction         'SAINT (Bruker, 2014)'
_computing_structure_solution     'SHELXL-2014 (Sheldrick, 2014)'
_computing_structure_refinement   'SHELXL-2014 (Sheldrick, 2014)'
_computing_molecular_graphics     'Bruker SHELXTL'
_computing_publication_material   'Bruker SHELXTL'
_refine_special_details           ?
_refine_ls_structure_factor_coef  Fsqd
_refine_ls_matrix_type            full
_refine_ls_weighting_scheme       calc
_refine_ls_weighting_details
'w=1/[\s^2^(Fo^2^)+(0.0400P)^2^+1.1473P] where P=(Fo^2^+2Fc^2^)/3'
_atom_sites_solution_primary      direct
_atom_sites_solution_secondary    difmap
_atom_sites_solution_hydrogens    mixed
_refine_ls_hydrogen_treatment     mixed
_refine_ls_extinction_method      none
_refine_ls_extinction_coef        na
_refine_ls_abs_structure_details
;
 Flack x determined using 3599 quotients [(I+)-(I-)]/[(I+)+(I-)]
 (Parsons, Flack and Wagner, Acta Cryst. B69 (2013) 249-259).
;
_refine_ls_abs_structure_Flack    -0.03(2)
_chemical_absolute_configuration  ad
_refine_ls_number_reflns          9584
_refine_ls_number_parameters      539
_refine_ls_number_restraints      523
_refine_ls_R_factor_all           0.0565
_refine_ls_R_factor_gt            0.0500
_refine_ls_wR_factor_ref          0.1150
_refine_ls_wR_factor_gt           0.1114
_refine_ls_goodness_of_fit_ref    1.059
_refine_ls_restrained_S_all       1.073
_refine_ls_shift/su_max           0.000
_refine_ls_shift/su_mean          0.000
 
loop_
 _atom_site_label
 _atom_site_type_symbol
 _atom_site_fract_x
 _atom_site_fract_y
 _atom_site_fract_z
 _atom_site_U_iso_or_equiv
 _atom_site_adp_type
 _atom_site_occupancy
 _atom_site_site_symmetry_order  
 _atom_site_calc_flag
 _atom_site_refinement_flags_posn
 _atom_site_refinement_flags_adp
 _atom_site_refinement_flags_occupancy
 _atom_site_disorder_assembly
 _atom_site_disorder_group
S1 S 0.36477(11) 0.51909(7) 0.68538(8) 0.0423(3) Uani 1 1 d . U . . .
O1 O 0.5081(4) 0.3453(2) 0.6634(3) 0.0697(12) Uani 1 1 d . U . . .
O2 O 0.6523(3) 0.7940(2) 0.8888(2) 0.0432(7) Uani 1 1 d . U . . .
O3 O 0.4419(2) 0.79082(19) 0.8793(2) 0.0351(6) Uani 1 1 d . U . . .
B1 B 0.5331(5) 0.8050(3) 0.8255(3) 0.0361(10) Uani 1 1 d . U . . .
C1 C 0.6787(5) 0.4073(4) 0.5997(4) 0.0695(16) Uani 1 1 d . U . . .
H1A H 0.7090 0.3434 0.6065 0.104 Uiso 1 1 calc R U . . .
H1B H 0.7431 0.4477 0.6433 0.104 Uiso 1 1 calc R U . . .
H1C H 0.6626 0.4261 0.5230 0.104 Uiso 1 1 calc R U . . .
C2 C 0.5595(5) 0.4142(3) 0.6395(3) 0.0500(11) Uani 1 1 d . U . . .
C3 C 0.5068(4) 0.5063(2) 0.6492(3) 0.0346(8) Uani 1 1 d . U . . .
C4 C 0.5573(4) 0.5895(3) 0.6310(3) 0.0404(9) Uani 1 1 d . U . . .
H4 H 0.6357 0.5951 0.6092 0.048 Uiso 1 1 calc R U . . .
C5 C 0.4850(5) 0.6650(3) 0.6466(3) 0.0450(11) Uani 1 1 d . U . . .
C6 C 0.5416(5) 0.7613(3) 0.6318(3) 0.0170(11) Uani 0.670(11) 1 d . U P A 1
H6A H 0.6351 0.7591 0.6565 0.020 Uiso 0.670(11) 1 calc R U P A 1
H6B H 0.5209 0.7784 0.5536 0.020 Uiso 0.670(11) 1 calc R U P A 1
C7 C 0.4874(4) 0.8344(3) 0.6985(3) 0.0158(11) Uani 0.670(11) 1 d D U P A 1
H7 H 0.397(6) 0.835(4) 0.683(4) 0.019 Uiso 0.670(11) 1 d . U P A 1
C6X C 0.4544(16) 0.7671(9) 0.6258(9) 0.039(4) Uani 0.330(11) 1 d . U P A 2
H6X1 H 0.371(14) 0.810(11) 0.638(11) 0.047 Uiso 0.330(11) 1 d . U P A 2
H6X2 H 0.464(12) 0.777(9) 0.550(11) 0.047 Uiso 0.330(11) 1 d . U P A 2
C7X C 0.5588(16) 0.8184(7) 0.7046(9) 0.037(3) Uani 0.330(11) 1 d D U P A 2
H7X H 0.6451 0.7964 0.6998 0.044 Uiso 0.330(11) 1 calc R U P A 2
C8 C 0.5417(4) 0.9284(3) 0.6824(3) 0.0319(8) Uani 1 1 d D U . . .
C9 C 0.6450(4) 0.9503(2) 0.6400(3) 0.0281(7) Uani 1 1 d . U . . .
H9 H 0.6969 0.9026 0.6220 0.034 Uiso 1 1 calc R U . . .
C10 C 0.6736(5) 1.0419(3) 0.6234(3) 0.0423(10) Uani 1 1 d . U . . .
H10 H 0.7445 1.0558 0.5933 0.051 Uiso 1 1 calc R U . . .
C11 C 0.6032(5) 1.1112(3) 0.6491(3) 0.0531(12) Uani 1 1 d . U . . .
H11 H 0.6250 1.1734 0.6378 0.064 Uiso 1 1 calc R U . . .
C12 C 0.5026(5) 1.0926(4) 0.6904(4) 0.0557(13) Uani 1 1 d . U . . .
H12 H 0.4529 1.1419 0.7079 0.067 Uiso 1 1 calc R U . . .
C13 C 0.4689(4) 1.0019(4) 0.7083(3) 0.0493(11) Uani 1 1 d . U . . .
H13 H 0.3970 0.9899 0.7379 0.059 Uiso 1 1 calc R U . . .
C14 C 0.3783(5) 0.6376(3) 0.6761(3) 0.0490(11) Uani 1 1 d . U . . .
H14 H 0.3164 0.6794 0.6903 0.059 Uiso 1 1 calc R U . . .
C15 C 0.6375(4) 0.7888(3) 1.0025(3) 0.0344(8) Uani 1 1 d . U . . .
C16 C 0.5011(4) 0.7531(3) 0.9869(3) 0.0317(8) Uani 1 1 d . U . . .
C17 C 0.6540(4) 0.8877(3) 1.0481(3) 0.0426(9) Uani 1 1 d . U . . .
H17A H 0.6449 0.8877 1.1240 0.064 Uiso 1 1 calc R U . . .
H17B H 0.7383 0.9106 1.0450 0.064 Uiso 1 1 calc R U . . .
H17C H 0.5892 0.9277 1.0044 0.064 Uiso 1 1 calc R U . . .
C18 C 0.7397(4) 0.7273(3) 1.0671(4) 0.0574(13) Uani 1 1 d . U . . .
H18A H 0.7303 0.7236 1.1427 0.086 Uiso 1 1 calc R U . . .
H18B H 0.7319 0.6655 1.0349 0.086 Uiso 1 1 calc R U . . .
H18C H 0.8231 0.7529 1.0655 0.086 Uiso 1 1 calc R U . . .
C19 C 0.4276(5) 0.7882(3) 1.0673(4) 0.0514(11) Uani 1 1 d . U . . .
H19A H 0.4652 0.7640 1.1400 0.077 Uiso 1 1 calc R U . . .
H19B H 0.4305 0.8558 1.0689 0.077 Uiso 1 1 calc R U . . .
H19C H 0.3393 0.7678 1.0452 0.077 Uiso 1 1 calc R U . . .
C20 C 0.4910(5) 0.6484(3) 0.9782(3) 0.0455(10) Uani 1 1 d . U . . .
H20A H 0.5297 0.6208 1.0488 0.068 Uiso 1 1 calc R U . . .
H20B H 0.4015 0.6306 0.9573 0.068 Uiso 1 1 calc R U . . .
H20C H 0.5353 0.6267 0.9228 0.068 Uiso 1 1 calc R U . . .
S2 S -0.13786(8) 0.49119(6) 0.18487(8) 0.0312(2) Uani 1 1 d . U . . .
O4 O -0.0509(2) 0.20474(18) 0.36426(17) 0.0277(5) Uani 1 1 d . U . . .
O5 O 0.1634(2) 0.22704(19) 0.40893(19) 0.0334(6) Uani 1 1 d . U . . .
O6 O 0.0370(3) 0.64654(18) 0.1756(2) 0.0415(7) Uani 1 1 d . U . . .
B2 B 0.0600(3) 0.2075(2) 0.3283(3) 0.0204(6) Uani 1 1 d . U . . .
C21 C 0.1928(3) 0.5693(3) 0.1000(3) 0.0333(8) Uani 1 1 d . U . . .
H21A H 0.1680 0.5541 0.0222 0.050 Uiso 1 1 calc R U . . .
H21B H 0.2501 0.5216 0.1381 0.050 Uiso 1 1 calc R U . . .
H21C H 0.2360 0.6291 0.1091 0.050 Uiso 1 1 calc R U . . .
C22 C 0.0769(3) 0.5739(2) 0.1468(3) 0.0274(7) Uani 1 1 d . U . . .
C23 C 0.0095(3) 0.4870(2) 0.1540(3) 0.0227(6) Uani 1 1 d . U . . .
C24 C 0.0417(3) 0.3982(2) 0.1334(2) 0.0202(6) Uani 1 1 d . U . . .
H24 H 0.1197 0.3819 0.1154 0.024 Uiso 1 1 calc R U . . .
C25 C -0.0539(3) 0.3331(2) 0.1419(3) 0.0221(6) Uani 1 1 d . U . . .
C26 C -0.0442(3) 0.2304(2) 0.1247(3) 0.0224(6) Uani 1 1 d . U . . .
H26A H -0.0324 0.2191 0.0499 0.027 Uiso 1 1 calc R U . . .
H26B H -0.1246 0.2007 0.1313 0.027 Uiso 1 1 calc R U . . .
C27 C 0.0663(3) 0.1859(2) 0.2073(3) 0.0206(6) Uani 1 1 d . U . . .
H27 H 0.136(3) 0.212(2) 0.193(3) 0.025 Uiso 1 1 d . U . . .
C28 C 0.0704(3) 0.0817(2) 0.1893(2) 0.0216(6) Uani 1 1 d . U . . .
C29 C 0.1609(4) 0.0415(2) 0.1408(3) 0.0293(7) Uani 1 1 d . U . . .
H29 H 0.2225 0.0797 0.1195 0.035 Uiso 1 1 calc R U . . .
C30 C 0.1638(4) -0.0527(3) 0.1228(3) 0.0395(9) Uani 1 1 d . U . . .
H30 H 0.2262 -0.0779 0.0886 0.047 Uiso 1 1 calc R U . . .
C31 C 0.0765(4) -0.1098(3) 0.1544(3) 0.0376(9) Uani 1 1 d . U . . .
H31 H 0.0789 -0.1745 0.1428 0.045 Uiso 1 1 calc R U . . .
C32 C -0.0150(4) -0.0718(3) 0.2035(3) 0.0340(8) Uani 1 1 d . U . . .
H32 H -0.0760 -0.1104 0.2251 0.041 Uiso 1 1 calc R U . . .
C33 C -0.0170(3) 0.0233(2) 0.2208(3) 0.0285(7) Uani 1 1 d . U . . .
H33 H -0.0795 0.0486 0.2549 0.034 Uiso 1 1 calc R U . . .
C34 C -0.1552(3) 0.3746(2) 0.1699(3) 0.0282(7) Uani 1 1 d . U . . .
H34 H -0.2279 0.3420 0.1800 0.034 Uiso 1 1 calc R U . . .
C35 C 0.0994(7) 0.2561(6) 0.5053(6) 0.0285(16) Uani 0.538(6) 1 d D U P B 1
C36 C -0.0260(6) 0.2021(6) 0.4839(5) 0.0251(13) Uani 0.538(6) 1 d D U P B 1
C37 C 0.0854(7) 0.3601(5) 0.4996(6) 0.0422(18) Uani 0.538(6) 1 d D U P B 1
H37A H 0.0258 0.3772 0.4318 0.063 Uiso 0.538(6) 1 calc R U P B 1
H37B H 0.0533 0.3820 0.5621 0.063 Uiso 0.538(6) 1 calc R U P B 1
H37C H 0.1681 0.3883 0.5011 0.063 Uiso 0.538(6) 1 calc R U P B 1
C38 C 0.1919(8) 0.2277(8) 0.6103(6) 0.057(2) Uani 0.538(6) 1 d D U P B 1
H38A H 0.1999 0.1604 0.6129 0.086 Uiso 0.538(6) 1 calc R U P B 1
H38B H 0.2750 0.2554 0.6123 0.086 Uiso 0.538(6) 1 calc R U P B 1
H38C H 0.1601 0.2491 0.6733 0.086 Uiso 0.538(6) 1 calc R U P B 1
C39 C -0.1323(7) 0.2504(6) 0.5224(6) 0.0349(16) Uani 0.538(6) 1 d D U P B 1
H39A H -0.1155 0.2486 0.6023 0.052 Uiso 0.538(6) 1 calc R U P B 1
H39B H -0.1375 0.3147 0.4978 0.052 Uiso 0.538(6) 1 calc R U P B 1
H39C H -0.2127 0.2192 0.4921 0.052 Uiso 0.538(6) 1 calc R U P B 1
C40 C -0.0131(8) 0.1023(5) 0.5211(6) 0.0418(18) Uani 0.538(6) 1 d D U P B 1
H40A H 0.0036 0.0999 0.6010 0.063 Uiso 0.538(6) 1 calc R U P B 1
H40B H -0.0918 0.0691 0.4904 0.063 Uiso 0.538(6) 1 calc R U P B 1
H40C H 0.0574 0.0735 0.4961 0.063 Uiso 0.538(6) 1 calc R U P B 1
C35X C 0.1361(7) 0.2224(6) 0.5110(7) 0.0215(16) Uani 0.462(6) 1 d D U P B 2
C36X C -0.0061(8) 0.2467(6) 0.4775(6) 0.0236(16) Uani 0.462(6) 1 d D U P B 2
C37X C 0.2185(8) 0.2878(7) 0.5881(7) 0.040(2) Uani 0.462(6) 1 d D U P B 2
H37D H 0.1980 0.2837 0.6601 0.061 Uiso 0.462(6) 1 calc R U P B 2
H37E H 0.3078 0.2715 0.5942 0.061 Uiso 0.462(6) 1 calc R U P B 2
H37F H 0.2038 0.3509 0.5603 0.061 Uiso 0.462(6) 1 calc R U P B 2
C38X C 0.1593(9) 0.1240(6) 0.5511(7) 0.039(2) Uani 0.462(6) 1 d D U P B 2
H38D H 0.1407 0.1184 0.6236 0.059 Uiso 0.462(6) 1 calc R U P B 2
H38E H 0.1042 0.0823 0.5004 0.059 Uiso 0.462(6) 1 calc R U P B 2
H38F H 0.2481 0.1077 0.5551 0.059 Uiso 0.462(6) 1 calc R U P B 2
C39X C -0.0343(8) 0.3505(6) 0.4684(6) 0.0342(19) Uani 0.462(6) 1 d D U P B 2
H39D H 0.0191 0.3797 0.4244 0.051 Uiso 0.462(6) 1 calc R U P B 2
H39E H -0.1238 0.3601 0.4336 0.051 Uiso 0.462(6) 1 calc R U P B 2
H39F H -0.0163 0.3780 0.5414 0.051 Uiso 0.462(6) 1 calc R U P B 2
C40X C -0.0882(8) 0.2005(7) 0.5456(6) 0.0349(19) Uani 0.462(6) 1 d D U P B 2
H40D H -0.0653 0.2239 0.6206 0.052 Uiso 0.462(6) 1 calc R U P B 2
H40E H -0.1776 0.2141 0.5144 0.052 Uiso 0.462(6) 1 calc R U P B 2
H40F H -0.0748 0.1336 0.5458 0.052 Uiso 0.462(6) 1 calc R U P B 2
 
loop_
 _atom_site_aniso_label
 _atom_site_aniso_U_11
 _atom_site_aniso_U_22
 _atom_site_aniso_U_33
 _atom_site_aniso_U_23
 _atom_site_aniso_U_13
 _atom_site_aniso_U_12
S1 0.0634(7) 0.0363(5) 0.0272(4) -0.0016(4) 0.0099(4) -0.0104(5)
O1 0.135(3) 0.0191(14) 0.0473(19) 0.0023(13) 0.003(2) 0.0025(17)
O2 0.0404(14) 0.0601(19) 0.0363(14) -0.0160(13) 0.0239(11) -0.0135(13)
O3 0.0337(13) 0.0416(15) 0.0269(12) 0.0115(11) 0.0001(10) -0.0071(11)
B1 0.054(2) 0.034(2) 0.0206(17) -0.0042(15) 0.0084(15) -0.0215(18)
C1 0.081(3) 0.074(4) 0.042(2) -0.006(2) -0.011(2) 0.034(3)
C2 0.083(3) 0.030(2) 0.0270(19) 0.0011(15) -0.0086(19) 0.012(2)
C3 0.055(2) 0.0232(18) 0.0200(15) 0.0013(13) -0.0039(14) -0.0043(15)
C4 0.065(3) 0.0295(18) 0.0199(16) -0.0019(13) -0.0042(16) -0.0133(17)
C5 0.092(3) 0.0220(17) 0.0173(15) 0.0026(12) 0.0052(18) -0.0081(18)
C6 0.018(3) 0.0164(19) 0.0171(19) 0.0002(14) 0.0046(16) -0.0031(15)
C7 0.007(2) 0.020(2) 0.0201(19) -0.0004(15) 0.0032(15) 0.0004(16)
C6X 0.059(10) 0.034(5) 0.019(5) 0.004(4) -0.005(5) -0.008(5)
C7X 0.050(8) 0.039(5) 0.024(5) -0.005(4) 0.016(4) -0.019(5)
C8 0.047(2) 0.0308(17) 0.0197(15) -0.0043(13) 0.0104(14) -0.0187(15)
C9 0.0370(18) 0.0247(16) 0.0238(16) -0.0013(12) 0.0090(13) -0.0001(13)
C10 0.062(3) 0.039(2) 0.0280(19) -0.0020(15) 0.0141(17) -0.0247(18)
C11 0.091(3) 0.027(2) 0.033(2) 0.0042(16) -0.005(2) 0.000(2)
C12 0.046(2) 0.053(3) 0.055(3) -0.021(2) -0.017(2) 0.023(2)
C13 0.0298(18) 0.080(3) 0.040(2) -0.023(2) 0.0099(15) -0.006(2)
C14 0.087(3) 0.034(2) 0.0249(18) -0.0006(15) 0.0091(19) 0.014(2)
C15 0.0354(18) 0.044(2) 0.0242(16) -0.0064(15) 0.0068(13) 0.0082(16)
C16 0.0342(17) 0.040(2) 0.0218(16) 0.0070(14) 0.0082(13) 0.0040(14)
C17 0.048(2) 0.039(2) 0.038(2) -0.0110(17) 0.0037(18) 0.0001(17)
C18 0.045(2) 0.055(3) 0.058(3) -0.020(2) -0.019(2) 0.024(2)
C19 0.059(3) 0.053(3) 0.054(2) 0.010(2) 0.040(2) 0.010(2)
C20 0.069(3) 0.035(2) 0.031(2) 0.0071(16) 0.0099(19) -0.0059(19)
S2 0.0294(4) 0.0240(4) 0.0406(5) -0.0050(4) 0.0088(3) 0.0042(3)
O4 0.0270(11) 0.0375(13) 0.0190(10) -0.0019(9) 0.0062(8) 0.0040(10)
O5 0.0322(12) 0.0414(15) 0.0246(11) -0.0027(10) 0.0020(9) -0.0073(10)
O6 0.0436(15) 0.0204(13) 0.0545(17) -0.0013(11) -0.0024(12) 0.0036(11)
B2 0.0205(15) 0.0160(15) 0.0236(16) 0.0002(12) 0.0029(12) 0.0026(12)
C21 0.0334(18) 0.0279(17) 0.0367(18) 0.0076(14) 0.0039(14) -0.0060(14)
C22 0.0282(16) 0.0216(15) 0.0268(16) 0.0061(12) -0.0061(12) 0.0019(12)
C23 0.0218(13) 0.0218(14) 0.0231(15) -0.0002(12) 0.0020(11) 0.0008(12)
C24 0.0215(14) 0.0184(14) 0.0197(14) -0.0011(11) 0.0021(11) 0.0016(11)
C25 0.0277(15) 0.0202(14) 0.0171(14) -0.0017(11) 0.0024(11) -0.0038(11)
C26 0.0284(15) 0.0167(13) 0.0212(14) -0.0005(11) 0.0033(12) -0.0037(11)
C27 0.0209(14) 0.0183(14) 0.0235(14) -0.0029(11) 0.0069(11) -0.0060(11)
C28 0.0258(15) 0.0211(14) 0.0167(13) -0.0016(11) 0.0020(11) -0.0005(11)
C29 0.0351(18) 0.0265(17) 0.0278(17) -0.0015(13) 0.0104(14) 0.0041(13)
C30 0.052(2) 0.0301(19) 0.036(2) -0.0092(15) 0.0090(17) 0.0128(16)
C31 0.060(2) 0.0205(16) 0.0254(17) -0.0020(13) -0.0046(16) -0.0002(16)
C32 0.047(2) 0.0239(16) 0.0263(16) 0.0040(13) -0.0023(15) -0.0129(15)
C33 0.0286(16) 0.0272(16) 0.0292(16) 0.0006(13) 0.0051(13) -0.0042(13)
C34 0.0270(16) 0.0265(17) 0.0311(17) -0.0037(13) 0.0061(13) -0.0049(12)
C35 0.026(3) 0.044(4) 0.016(3) -0.007(3) 0.005(2) 0.001(3)
C36 0.024(3) 0.031(4) 0.021(3) 0.000(3) 0.007(2) -0.002(2)
C37 0.052(4) 0.042(4) 0.038(4) -0.021(3) 0.021(3) -0.024(3)
C38 0.044(4) 0.092(7) 0.030(3) -0.004(4) -0.004(3) -0.008(4)
C39 0.037(4) 0.040(4) 0.032(3) -0.009(3) 0.017(3) -0.005(3)
C40 0.060(5) 0.034(4) 0.035(4) 0.007(3) 0.019(3) 0.004(3)
C35X 0.017(3) 0.026(4) 0.021(3) 0.003(3) 0.001(2) -0.002(3)
C36X 0.027(3) 0.030(4) 0.017(3) -0.001(3) 0.010(3) -0.007(3)
C37X 0.036(4) 0.055(5) 0.030(4) -0.009(4) 0.008(3) -0.018(4)
C38X 0.053(5) 0.037(4) 0.025(4) 0.007(3) 0.003(3) 0.004(3)
C39X 0.048(5) 0.034(4) 0.022(4) -0.004(3) 0.012(3) 0.002(3)
C40X 0.034(4) 0.046(5) 0.027(4) -0.006(3) 0.014(3) -0.008(4)
 
_geom_special_details
;
 All esds (except the esd in the dihedral angle between two l.s. planes)
 are estimated using the full covariance matrix.  The cell esds are taken
 into account individually in the estimation of esds in distances, angles
 and torsion angles; correlations between esds in cell parameters are only
 used when they are defined by crystal symmetry.  An approximate (isotropic)
 treatment of cell esds is used for estimating esds involving l.s. planes.
;
 
loop_
 _geom_bond_atom_site_label_1
 _geom_bond_atom_site_label_2
 _geom_bond_distance
 _geom_bond_site_symmetry_2
 _geom_bond_publ_flag
S1 C3 1.706(4) . ?
S1 C14 1.731(5) . ?
O1 C2 1.213(6) . ?
O2 B1 1.367(5) . ?
O2 C15 1.475(4) . ?
O3 B1 1.328(5) . ?
O3 C16 1.468(4) . ?
B1 C7X 1.617(12) . ?
B1 C7 1.621(6) . ?
C1 C2 1.485(8) . ?
C1 H1A 0.9800 . ?
C1 H1B 0.9800 . ?
C1 H1C 0.9800 . ?
C2 C3 1.467(6) . ?
C3 C4 1.364(5) . ?
C4 C5 1.385(6) . ?
C4 H4 0.9500 . ?
C5 C14 1.347(7) . ?
C5 C6X 1.527(14) . ?
C5 C6 1.553(6) . ?
C6 C7 1.546(6) . ?
C6 H6A 0.9900 . ?
C6 H6B 0.9900 . ?
C7 C8 1.514(5) . ?
C7 H7 0.95(6) . ?
C6X C7X 1.521(19) . ?
C6X H6X1 1.13(16) . ?
C6X H6X2 1.00(13) . ?
C7X C8 1.623(11) . ?
C7X H7X 1.0000 . ?
C8 C9 1.377(5) . ?
C8 C13 1.405(6) . ?
C9 C10 1.390(5) . ?
C9 H9 0.9500 . ?
C10 C11 1.342(7) . ?
C10 H10 0.9500 . ?
C11 C12 1.333(7) . ?
C11 H11 0.9500 . ?
C12 C13 1.396(8) . ?
C12 H12 0.9500 . ?
C13 H13 0.9500 . ?
C14 H14 0.9500 . ?
C15 C18 1.509(5) . ?
C15 C16 1.535(6) . ?
C15 C17 1.540(6) . ?
C16 C19 1.506(5) . ?
C16 C20 1.524(6) . ?
C17 H17A 0.9800 . ?
C17 H17B 0.9800 . ?
C17 H17C 0.9800 . ?
C18 H18A 0.9800 . ?
C18 H18B 0.9800 . ?
C18 H18C 0.9800 . ?
C19 H19A 0.9800 . ?
C19 H19B 0.9800 . ?
C19 H19C 0.9800 . ?
C20 H20A 0.9800 . ?
C20 H20B 0.9800 . ?
C20 H20C 0.9800 . ?
S2 C34 1.707(4) . ?
S2 C23 1.723(3) . ?
O4 B2 1.373(4) . ?
O4 C36 1.468(6) . ?
O4 C36X 1.525(8) . ?
O5 B2 1.363(4) . ?
O5 C35X 1.381(9) . ?
O5 C35 1.580(7) . ?
O6 C22 1.222(4) . ?
B2 C27 1.569(5) . ?
C21 C22 1.500(5) . ?
C21 H21A 0.9800 . ?
C21 H21B 0.9800 . ?
C21 H21C 0.9800 . ?
C22 C23 1.468(5) . ?
C23 C24 1.374(5) . ?
C24 C25 1.420(4) . ?
C24 H24 0.9500 . ?
C25 C34 1.363(5) . ?
C25 C26 1.512(4) . ?
C26 C27 1.541(4) . ?
C26 H26A 0.9900 . ?
C26 H26B 0.9900 . ?
C27 C28 1.530(4) . ?
C27 H27 0.90(4) . ?
C28 C29 1.390(5) . ?
C28 C33 1.391(5) . ?
C29 C30 1.386(5) . ?
C29 H29 0.9500 . ?
C30 C31 1.379(6) . ?
C30 H30 0.9500 . ?
C31 C32 1.391(6) . ?
C31 H31 0.9500 . ?
C32 C33 1.396(5) . ?
C32 H32 0.9500 . ?
C33 H33 0.9500 . ?
C34 H34 0.9500 . ?
C35 C37 1.515(11) . ?
C35 C38 1.526(11) . ?
C35 C36 1.538(9) . ?
C36 C39 1.514(9) . ?
C36 C40 1.518(10) . ?
C37 H37A 0.9800 . ?
C37 H37B 0.9800 . ?
C37 H37C 0.9800 . ?
C38 H38A 0.9800 . ?
C38 H38B 0.9800 . ?
C38 H38C 0.9800 . ?
C39 H39A 0.9800 . ?
C39 H39B 0.9800 . ?
C39 H39C 0.9800 . ?
C40 H40A 0.9800 . ?
C40 H40B 0.9800 . ?
C40 H40C 0.9800 . ?
C35X C37X 1.500(11) . ?
C35X C38X 1.515(12) . ?
C35X C36X 1.543(10) . ?
C36X C40X 1.519(11) . ?
C36X C39X 1.535(11) . ?
C37X H37D 0.9800 . ?
C37X H37E 0.9800 . ?
C37X H37F 0.9800 . ?
C38X H38D 0.9800 . ?
C38X H38E 0.9800 . ?
C38X H38F 0.9800 . ?
C39X H39D 0.9800 . ?
C39X H39E 0.9800 . ?
C39X H39F 0.9800 . ?
C40X H40D 0.9800 . ?
C40X H40E 0.9800 . ?
C40X H40F 0.9800 . ?
 
loop_
 _geom_angle_atom_site_label_1
 _geom_angle_atom_site_label_2
 _geom_angle_atom_site_label_3
 _geom_angle
 _geom_angle_site_symmetry_1
 _geom_angle_site_symmetry_3
 _geom_angle_publ_flag
C3 S1 C14 89.7(2) . . ?
B1 O2 C15 106.2(3) . . ?
B1 O3 C16 107.7(3) . . ?
O3 B1 O2 113.4(3) . . ?
O3 B1 C7X 143.0(7) . . ?
O2 B1 C7X 103.0(7) . . ?
O3 B1 C7 116.3(4) . . ?
O2 B1 C7 130.3(4) . . ?
C2 C1 H1A 109.5 . . ?
C2 C1 H1B 109.5 . . ?
H1A C1 H1B 109.5 . . ?
C2 C1 H1C 109.5 . . ?
H1A C1 H1C 109.5 . . ?
H1B C1 H1C 109.5 . . ?
O1 C2 C3 121.4(5) . . ?
O1 C2 C1 120.5(4) . . ?
C3 C2 C1 118.2(4) . . ?
C4 C3 C2 127.8(4) . . ?
C4 C3 S1 111.5(3) . . ?
C2 C3 S1 120.7(3) . . ?
C3 C4 C5 114.5(4) . . ?
C3 C4 H4 122.7 . . ?
C5 C4 H4 122.7 . . ?
C14 C5 C4 110.6(4) . . ?
C14 C5 C6X 99.5(8) . . ?
C4 C5 C6X 148.2(7) . . ?
C14 C5 C6 133.0(4) . . ?
C4 C5 C6 116.4(4) . . ?
C7 C6 C5 110.2(4) . . ?
C7 C6 H6A 109.6 . . ?
C5 C6 H6A 109.6 . . ?
C7 C6 H6B 109.6 . . ?
C5 C6 H6B 109.6 . . ?
H6A C6 H6B 108.1 . . ?
C8 C7 C6 109.9(4) . . ?
C8 C7 B1 109.0(3) . . ?
C6 C7 B1 106.5(4) . . ?
C8 C7 H7 112(3) . . ?
C6 C7 H7 113(3) . . ?
B1 C7 H7 106(3) . . ?
C7X C6X C5 105.1(10) . . ?
C7X C6X H6X1 98(7) . . ?
C5 C6X H6X1 131(8) . . ?
C7X C6X H6X2 109(8) . . ?
C5 C6X H6X2 104(8) . . ?
H6X1 C6X H6X2 108(10) . . ?
C6X C7X B1 107.2(10) . . ?
C6X C7X C8 109.2(10) . . ?
B1 C7X C8 104.0(7) . . ?
C6X C7X H7X 112.0 . . ?
B1 C7X H7X 112.0 . . ?
C8 C7X H7X 112.0 . . ?
C9 C8 C13 117.3(4) . . ?
C9 C8 C7 129.1(4) . . ?
C13 C8 C7 113.5(4) . . ?
C9 C8 C7X 102.8(6) . . ?
C13 C8 C7X 139.0(6) . . ?
C8 C9 C10 120.3(4) . . ?
C8 C9 H9 119.8 . . ?
C10 C9 H9 119.8 . . ?
C11 C10 C9 121.5(4) . . ?
C11 C10 H10 119.2 . . ?
C9 C10 H10 119.2 . . ?
C12 C11 C10 119.8(4) . . ?
C12 C11 H11 120.1 . . ?
C10 C11 H11 120.1 . . ?
C11 C12 C13 121.3(4) . . ?
C11 C12 H12 119.4 . . ?
C13 C12 H12 119.4 . . ?
C12 C13 C8 119.8(4) . . ?
C12 C13 H13 120.1 . . ?
C8 C13 H13 120.1 . . ?
C5 C14 S1 113.7(3) . . ?
C5 C14 H14 123.2 . . ?
S1 C14 H14 123.2 . . ?
O2 C15 C18 109.1(3) . . ?
O2 C15 C16 101.5(3) . . ?
C18 C15 C16 116.0(4) . . ?
O2 C15 C17 106.6(3) . . ?
C18 C15 C17 109.8(3) . . ?
C16 C15 C17 113.0(3) . . ?
O3 C16 C19 107.8(3) . . ?
O3 C16 C20 107.2(3) . . ?
C19 C16 C20 110.2(4) . . ?
O3 C16 C15 101.8(3) . . ?
C19 C16 C15 115.8(4) . . ?
C20 C16 C15 113.4(4) . . ?
C15 C17 H17A 109.5 . . ?
C15 C17 H17B 109.5 . . ?
H17A C17 H17B 109.5 . . ?
C15 C17 H17C 109.5 . . ?
H17A C17 H17C 109.5 . . ?
H17B C17 H17C 109.5 . . ?
C15 C18 H18A 109.5 . . ?
C15 C18 H18B 109.5 . . ?
H18A C18 H18B 109.5 . . ?
C15 C18 H18C 109.5 . . ?
H18A C18 H18C 109.5 . . ?
H18B C18 H18C 109.5 . . ?
C16 C19 H19A 109.5 . . ?
C16 C19 H19B 109.5 . . ?
H19A C19 H19B 109.5 . . ?
C16 C19 H19C 109.5 . . ?
H19A C19 H19C 109.5 . . ?
H19B C19 H19C 109.5 . . ?
C16 C20 H20A 109.5 . . ?
C16 C20 H20B 109.5 . . ?
H20A C20 H20B 109.5 . . ?
C16 C20 H20C 109.5 . . ?
H20A C20 H20C 109.5 . . ?
H20B C20 H20C 109.5 . . ?
C34 S2 C23 91.43(17) . . ?
B2 O4 C36 111.2(3) . . ?
B2 O4 C36X 100.1(4) . . ?
B2 O5 C35X 111.8(4) . . ?
B2 O5 C35 101.4(3) . . ?
O5 B2 O4 113.3(3) . . ?
O5 B2 C27 123.9(3) . . ?
O4 B2 C27 122.8(3) . . ?
C22 C21 H21A 109.5 . . ?
C22 C21 H21B 109.5 . . ?
H21A C21 H21B 109.5 . . ?
C22 C21 H21C 109.5 . . ?
H21A C21 H21C 109.5 . . ?
H21B C21 H21C 109.5 . . ?
O6 C22 C23 120.6(3) . . ?
O6 C22 C21 122.4(3) . . ?
C23 C22 C21 117.1(3) . . ?
C24 C23 C22 130.0(3) . . ?
C24 C23 S2 111.1(2) . . ?
C22 C23 S2 118.7(3) . . ?
C23 C24 C25 112.9(3) . . ?
C23 C24 H24 123.5 . . ?
C25 C24 H24 123.5 . . ?
C34 C25 C24 111.5(3) . . ?
C34 C25 C26 123.8(3) . . ?
C24 C25 C26 124.6(3) . . ?
C25 C26 C27 112.6(3) . . ?
C25 C26 H26A 109.1 . . ?
C27 C26 H26A 109.1 . . ?
C25 C26 H26B 109.1 . . ?
C27 C26 H26B 109.1 . . ?
H26A C26 H26B 107.8 . . ?
C28 C27 C26 111.0(2) . . ?
C28 C27 B2 110.5(3) . . ?
C26 C27 B2 112.0(3) . . ?
C28 C27 H27 110(2) . . ?
C26 C27 H27 104(2) . . ?
B2 C27 H27 109(2) . . ?
C29 C28 C33 117.3(3) . . ?
C29 C28 C27 121.7(3) . . ?
C33 C28 C27 121.1(3) . . ?
C30 C29 C28 121.9(4) . . ?
C30 C29 H29 119.0 . . ?
C28 C29 H29 119.0 . . ?
C31 C30 C29 120.2(4) . . ?
C31 C30 H30 119.9 . . ?
C29 C30 H30 119.9 . . ?
C30 C31 C32 119.3(3) . . ?
C30 C31 H31 120.4 . . ?
C32 C31 H31 120.4 . . ?
C31 C32 C33 119.9(3) . . ?
C31 C32 H32 120.1 . . ?
C33 C32 H32 120.1 . . ?
C28 C33 C32 121.4(3) . . ?
C28 C33 H33 119.3 . . ?
C32 C33 H33 119.3 . . ?
C25 C34 S2 113.0(3) . . ?
C25 C34 H34 123.5 . . ?
S2 C34 H34 123.5 . . ?
C37 C35 C38 110.4(7) . . ?
C37 C35 C36 115.0(7) . . ?
C38 C35 C36 113.5(7) . . ?
C37 C35 O5 106.5(5) . . ?
C38 C35 O5 106.0(6) . . ?
C36 C35 O5 104.4(5) . . ?
O4 C36 C39 109.6(5) . . ?
O4 C36 C40 108.9(5) . . ?
C39 C36 C40 111.5(6) . . ?
O4 C36 C35 97.0(5) . . ?
C39 C36 C35 114.3(7) . . ?
C40 C36 C35 114.4(6) . . ?
C35 C37 H37A 109.5 . . ?
C35 C37 H37B 109.5 . . ?
H37A C37 H37B 109.5 . . ?
C35 C37 H37C 109.5 . . ?
H37A C37 H37C 109.5 . . ?
H37B C37 H37C 109.5 . . ?
C35 C38 H38A 109.5 . . ?
C35 C38 H38B 109.5 . . ?
H38A C38 H38B 109.5 . . ?
C35 C38 H38C 109.5 . . ?
H38A C38 H38C 109.5 . . ?
H38B C38 H38C 109.5 . . ?
C36 C39 H39A 109.5 . . ?
C36 C39 H39B 109.5 . . ?
H39A C39 H39B 109.5 . . ?
C36 C39 H39C 109.5 . . ?
H39A C39 H39C 109.5 . . ?
H39B C39 H39C 109.5 . . ?
C36 C40 H40A 109.5 . . ?
C36 C40 H40B 109.5 . . ?
H40A C40 H40B 109.5 . . ?
C36 C40 H40C 109.5 . . ?
H40A C40 H40C 109.5 . . ?
H40B C40 H40C 109.5 . . ?
O5 C35X C37X 110.5(6) . . ?
O5 C35X C38X 107.5(7) . . ?
C37X C35X C38X 110.5(7) . . ?
O5 C35X C36X 98.1(5) . . ?
C37X C35X C36X 116.5(8) . . ?
C38X C35X C36X 112.8(7) . . ?
C40X C36X O4 104.2(6) . . ?
C40X C36X C39X 110.1(7) . . ?
O4 C36X C39X 107.7(6) . . ?
C40X C36X C35X 114.7(7) . . ?
O4 C36X C35X 104.8(6) . . ?
C39X C36X C35X 114.5(8) . . ?
C35X C37X H37D 109.5 . . ?
C35X C37X H37E 109.5 . . ?
H37D C37X H37E 109.5 . . ?
C35X C37X H37F 109.5 . . ?
H37D C37X H37F 109.5 . . ?
H37E C37X H37F 109.5 . . ?
C35X C38X H38D 109.5 . . ?
C35X C38X H38E 109.5 . . ?
H38D C38X H38E 109.5 . . ?
C35X C38X H38F 109.5 . . ?
H38D C38X H38F 109.5 . . ?
H38E C38X H38F 109.5 . . ?
C36X C39X H39D 109.5 . . ?
C36X C39X H39E 109.5 . . ?
H39D C39X H39E 109.5 . . ?
C36X C39X H39F 109.5 . . ?
H39D C39X H39F 109.5 . . ?
H39E C39X H39F 109.5 . . ?
C36X C40X H40D 109.5 . . ?
C36X C40X H40E 109.5 . . ?
H40D C40X H40E 109.5 . . ?
C36X C40X H40F 109.5 . . ?
H40D C40X H40F 109.5 . . ?
H40E C40X H40F 109.5 . . ?
 
loop_
 _geom_torsion_atom_site_label_1
 _geom_torsion_atom_site_label_2
 _geom_torsion_atom_site_label_3
 _geom_torsion_atom_site_label_4
 _geom_torsion
 _geom_torsion_site_symmetry_1
 _geom_torsion_site_symmetry_2
 _geom_torsion_site_symmetry_3
 _geom_torsion_site_symmetry_4
 _geom_torsion_publ_flag
C16 O3 B1 O2 -8.9(4) . . . . ?
C16 O3 B1 C7X 159.5(8) . . . . ?
C16 O3 B1 C7 172.5(3) . . . . ?
C15 O2 B1 O3 -11.6(4) . . . . ?
C15 O2 B1 C7X 175.5(4) . . . . ?
C15 O2 B1 C7 166.7(4) . . . . ?
O1 C2 C3 C4 176.3(4) . . . . ?
C1 C2 C3 C4 -3.5(6) . . . . ?
O1 C2 C3 S1 -4.7(5) . . . . ?
C1 C2 C3 S1 175.5(3) . . . . ?
C14 S1 C3 C4 -0.6(3) . . . . ?
C14 S1 C3 C2 -179.7(3) . . . . ?
C2 C3 C4 C5 179.8(4) . . . . ?
S1 C3 C4 C5 0.8(4) . . . . ?
C3 C4 C5 C14 -0.6(5) . . . . ?
C3 C4 C5 C6X -161.1(10) . . . . ?
C3 C4 C5 C6 177.4(3) . . . . ?
C14 C5 C6 C7 22.6(6) . . . . ?
C4 C5 C6 C7 -154.7(4) . . . . ?
C5 C6 C7 C8 -179.2(3) . . . . ?
C5 C6 C7 B1 62.8(5) . . . . ?
O3 B1 C7 C8 119.4(4) . . . . ?
O2 B1 C7 C8 -58.9(6) . . . . ?
O3 B1 C7 C6 -122.2(4) . . . . ?
O2 B1 C7 C6 59.6(5) . . . . ?
C14 C5 C6X C7X 120.3(10) . . . . ?
C4 C5 C6X C7X -78.1(13) . . . . ?
C5 C6X C7X B1 -72.4(13) . . . . ?
C5 C6X C7X C8 175.5(8) . . . . ?
O3 B1 C7X C6X -27.9(15) . . . . ?
O2 B1 C7X C6X 141.1(9) . . . . ?
O3 B1 C7X C8 87.6(10) . . . . ?
O2 B1 C7X C8 -103.3(8) . . . . ?
C6 C7 C8 C9 -15.3(6) . . . . ?
B1 C7 C8 C9 101.0(5) . . . . ?
C6 C7 C8 C13 159.8(4) . . . . ?
B1 C7 C8 C13 -83.8(4) . . . . ?
C6X C7X C8 C9 -111.5(10) . . . . ?
B1 C7X C8 C9 134.3(7) . . . . ?
C6X C7X C8 C13 80.7(11) . . . . ?
B1 C7X C8 C13 -33.5(14) . . . . ?
C13 C8 C9 C10 -0.5(6) . . . . ?
C7 C8 C9 C10 174.5(4) . . . . ?
C7X C8 C9 C10 -171.5(6) . . . . ?
C8 C9 C10 C11 0.8(6) . . . . ?
C9 C10 C11 C12 -0.7(7) . . . . ?
C10 C11 C12 C13 0.4(7) . . . . ?
C11 C12 C13 C8 -0.1(7) . . . . ?
C9 C8 C13 C12 0.2(6) . . . . ?
C7 C8 C13 C12 -175.6(4) . . . . ?
C7X C8 C13 C12 166.8(8) . . . . ?
C4 C5 C14 S1 0.1(4) . . . . ?
C6X C5 C14 S1 169.9(5) . . . . ?
C6 C5 C14 S1 -177.3(4) . . . . ?
C3 S1 C14 C5 0.2(3) . . . . ?
B1 O2 C15 C18 148.6(4) . . . . ?
B1 O2 C15 C16 25.6(4) . . . . ?
B1 O2 C15 C17 -92.8(4) . . . . ?
B1 O3 C16 C19 146.6(4) . . . . ?
B1 O3 C16 C20 -94.8(4) . . . . ?
B1 O3 C16 C15 24.4(4) . . . . ?
O2 C15 C16 O3 -29.6(4) . . . . ?
C18 C15 C16 O3 -147.8(3) . . . . ?
C17 C15 C16 O3 84.1(4) . . . . ?
O2 C15 C16 C19 -146.1(3) . . . . ?
C18 C15 C16 C19 95.7(4) . . . . ?
C17 C15 C16 C19 -32.4(5) . . . . ?
O2 C15 C16 C20 85.1(4) . . . . ?
C18 C15 C16 C20 -33.0(5) . . . . ?
C17 C15 C16 C20 -161.2(3) . . . . ?
C35X O5 B2 O4 11.3(5) . . . . ?
C35 O5 B2 O4 -10.2(5) . . . . ?
C35X O5 B2 C27 -166.1(5) . . . . ?
C35 O5 B2 C27 172.3(4) . . . . ?
C36 O4 B2 O5 -13.3(5) . . . . ?
C36X O4 B2 O5 11.9(5) . . . . ?
C36 O4 B2 C27 164.2(4) . . . . ?
C36X O4 B2 C27 -170.6(4) . . . . ?
O6 C22 C23 C24 -175.1(3) . . . . ?
C21 C22 C23 C24 6.7(5) . . . . ?
O6 C22 C23 S2 9.2(4) . . . . ?
C21 C22 C23 S2 -169.0(2) . . . . ?
C34 S2 C23 C24 -0.1(3) . . . . ?
C34 S2 C23 C22 176.4(3) . . . . ?
C22 C23 C24 C25 -175.5(3) . . . . ?
S2 C23 C24 C25 0.4(3) . . . . ?
C23 C24 C25 C34 -0.7(4) . . . . ?
C23 C24 C25 C26 -179.4(3) . . . . ?
C34 C25 C26 C27 -116.8(3) . . . . ?
C24 C25 C26 C27 61.8(4) . . . . ?
C25 C26 C27 C28 178.3(3) . . . . ?
C25 C26 C27 B2 54.3(3) . . . . ?
O5 B2 C27 C28 95.5(4) . . . . ?
O4 B2 C27 C28 -81.7(4) . . . . ?
O5 B2 C27 C26 -140.2(3) . . . . ?
O4 B2 C27 C26 42.6(4) . . . . ?
C26 C27 C28 C29 105.3(3) . . . . ?
B2 C27 C28 C29 -129.9(3) . . . . ?
C26 C27 C28 C33 -74.6(4) . . . . ?
B2 C27 C28 C33 50.3(4) . . . . ?
C33 C28 C29 C30 0.9(5) . . . . ?
C27 C28 C29 C30 -179.0(3) . . . . ?
C28 C29 C30 C31 -0.9(6) . . . . ?
C29 C30 C31 C32 0.6(6) . . . . ?
C30 C31 C32 C33 -0.4(6) . . . . ?
C29 C28 C33 C32 -0.7(5) . . . . ?
C27 C28 C33 C32 179.2(3) . . . . ?
C31 C32 C33 C28 0.5(5) . . . . ?
C24 C25 C34 S2 0.7(4) . . . . ?
C26 C25 C34 S2 179.3(2) . . . . ?
C23 S2 C34 C25 -0.3(3) . . . . ?
B2 O5 C35 C37 -93.5(5) . . . . ?
B2 O5 C35 C38 148.8(6) . . . . ?
B2 O5 C35 C36 28.6(6) . . . . ?
B2 O4 C36 C39 148.8(5) . . . . ?
B2 O4 C36 C40 -89.0(5) . . . . ?
B2 O4 C36 C35 29.9(6) . . . . ?
C37 C35 C36 O4 82.3(6) . . . . ?
C38 C35 C36 O4 -149.1(6) . . . . ?
O5 C35 C36 O4 -34.1(6) . . . . ?
C37 C35 C36 C39 -32.9(8) . . . . ?
C38 C35 C36 C39 95.7(9) . . . . ?
O5 C35 C36 C39 -149.3(5) . . . . ?
C37 C35 C36 C40 -163.2(6) . . . . ?
C38 C35 C36 C40 -34.6(9) . . . . ?
O5 C35 C36 C40 80.4(7) . . . . ?
B2 O5 C35X C37X -150.2(6) . . . . ?
B2 O5 C35X C38X 89.3(6) . . . . ?
B2 O5 C35X C36X -27.8(7) . . . . ?
B2 O4 C36X C40X -149.0(6) . . . . ?
B2 O4 C36X C39X 94.1(6) . . . . ?
B2 O4 C36X C35X -28.2(6) . . . . ?
O5 C35X C36X C40X 147.5(7) . . . . ?
C37X C35X C36X C40X -94.8(10) . . . . ?
C38X C35X C36X C40X 34.6(10) . . . . ?
O5 C35X C36X O4 33.9(7) . . . . ?
C37X C35X C36X O4 151.6(7) . . . . ?
C38X C35X C36X O4 -79.0(8) . . . . ?
O5 C35X C36X C39X -83.9(7) . . . . ?
C37X C35X C36X C39X 33.8(10) . . . . ?
C38X C35X C36X C39X 163.2(7) . . . . ?
 
_refine_diff_density_max    0.368
_refine_diff_density_min   -0.386
_refine_diff_density_rms    0.046

_shelx_res_file
;

    sad_b.res created by SHELXL-2014/7


TITL sad_b.res in P2(1)
CELL  0.71073  10.8178  14.4999  12.5691   90.000  102.765   90.000
ZERR    4.000   0.0023   0.0030   0.0026    0.000    0.004    0.000
LATT -1
SYMM -X, 1/2+Y, -Z
SFAC C  H  B  O  S
UNIT 80  100  4  12  4

L.S. 10
BOND $H
FMAP 2
PLAN 20
TEMP -173
SIZE 0.60 0.40 0.27
OMIT -6 0 1
SADI 0.01 C7 C8 C7X C8
RIGU
CONF
HTAB
ACTA

WGHT    0.040000    1.147300
FVAR       0.32618   0.53768   0.66957
MOLE 1
S1    5    0.364772    0.519088    0.685376    11.00000    0.06336    0.03633 =
         0.02720   -0.00161    0.00993   -0.01036
O1    4    0.508081    0.345337    0.663368    11.00000    0.13481    0.01913 =
         0.04733    0.00233    0.00297    0.00250
O2    4    0.652315    0.793989    0.888775    11.00000    0.04044    0.06005 =
         0.03629   -0.01603    0.02388   -0.01352
O3    4    0.441925    0.790824    0.879293    11.00000    0.03369    0.04161 =
         0.02692    0.01147    0.00008   -0.00708
B1    3    0.533060    0.804960    0.825545    11.00000    0.05380    0.03388 =
         0.02062   -0.00416    0.00844   -0.02154
C1    1    0.678686    0.407276    0.599713    11.00000    0.08107    0.07439 =
         0.04172   -0.00584   -0.01094    0.03417
AFIX 137
H1A   2    0.709027    0.343403    0.606539    11.00000   -1.50000
H1B   2    0.743065    0.447696    0.643336    11.00000   -1.50000
H1C   2    0.662576    0.426148    0.523013    11.00000   -1.50000
AFIX   0
C2    1    0.559542    0.414220    0.639500    11.00000    0.08335    0.02995 =
         0.02698    0.00110   -0.00859    0.01195
C3    1    0.506809    0.506277    0.649224    11.00000    0.05485    0.02320 =
         0.01998    0.00131   -0.00391   -0.00427
C4    1    0.557311    0.589460    0.630954    11.00000    0.06530    0.02952 =
         0.01993   -0.00188   -0.00422   -0.01329
AFIX  43
H4    2    0.635699    0.595121    0.609246    11.00000   -1.20000
AFIX   0
C5    1    0.485006    0.664954    0.646630    11.00000    0.09240    0.02197 =
         0.01728    0.00262    0.00520   -0.00810
PART 1
C6    1    0.541633    0.761297    0.631806    31.00000    0.01768    0.01642 =
         0.01712    0.00022    0.00463   -0.00308
AFIX  23
H6A   2    0.635056    0.759094    0.656495    31.00000   -1.20000
H6B   2    0.520856    0.778435    0.553633    31.00000   -1.20000
AFIX   0
C7    1    0.487382    0.834440    0.698485    31.00000    0.00742    0.01983 =
         0.02009   -0.00044    0.00323    0.00036
H7    2    0.397397    0.834848    0.683245    31.00000   -1.20000
PART 2
SAME C6X C7X
C6X   1    0.454357    0.767067    0.625848   -31.00000    0.05919    0.03439 =
         0.01855    0.00394   -0.00507   -0.00783
H6X1  2    0.370816    0.809646    0.638119   -31.00000   -1.20000
H6X2  2    0.464273    0.777064    0.549823   -31.00000   -1.20000
C7X   1    0.558816    0.818352    0.704567   -31.00000    0.05042    0.03900 =
         0.02370   -0.00491    0.01591   -0.01880
AFIX  13
H7X   2    0.645087    0.796444    0.699829   -31.00000   -1.20000
AFIX   0
PART 0
C8    1    0.541671    0.928383    0.682430    11.00000    0.04661    0.03082 =
         0.01970   -0.00426    0.01038   -0.01870
C9    1    0.644959    0.950302    0.640006    11.00000    0.03702    0.02466 =
         0.02380   -0.00133    0.00903   -0.00011
AFIX  43
H9    2    0.696914    0.902571    0.621978    11.00000   -1.20000
AFIX   0
C10   1    0.673552    1.041916    0.623440    11.00000    0.06177    0.03919 =
         0.02800   -0.00198    0.01413   -0.02471
AFIX  43
H10   2    0.744542    1.055802    0.593290    11.00000   -1.20000
AFIX   0
C11   1    0.603162    1.111210    0.649064    11.00000    0.09091    0.02686 =
         0.03282    0.00424   -0.00539   -0.00013
AFIX  43
H11   2    0.624964    1.173357    0.637792    11.00000   -1.20000
AFIX   0
C12   1    0.502584    1.092554    0.690372    11.00000    0.04633    0.05257 =
         0.05491   -0.02090   -0.01730    0.02251
AFIX  43
H12   2    0.452865    1.141901    0.707938    11.00000   -1.20000
AFIX   0
C13   1    0.468920    1.001903    0.708310    11.00000    0.02978    0.07956 =
         0.03970   -0.02258    0.00990   -0.00603
AFIX  43
H13   2    0.396990    0.989922    0.737947    11.00000   -1.20000
AFIX   0
C14   1    0.378341    0.637580    0.676053    11.00000    0.08698    0.03355 =
         0.02492   -0.00065    0.00908    0.01416
AFIX  43
H14   2    0.316375    0.679396    0.690346    11.00000   -1.20000
AFIX   0
C15   1    0.637525    0.788814    1.002535    11.00000    0.03536    0.04368 =
         0.02420   -0.00640    0.00678    0.00823
C16   1    0.501065    0.753128    0.986870    11.00000    0.03417    0.04014 =
         0.02177    0.00700    0.00821    0.00399
C17   1    0.653965    0.887696    1.048128    11.00000    0.04790    0.03923 =
         0.03795   -0.01101    0.00374    0.00011
AFIX  33
H17A  2    0.644858    0.887651    1.123990    11.00000   -1.50000
H17B  2    0.738317    0.910634    1.045048    11.00000   -1.50000
H17C  2    0.589186    0.927738    1.004367    11.00000   -1.50000
AFIX   0
C18   1    0.739653    0.727326    1.067071    11.00000    0.04490    0.05523 =
         0.05784   -0.01992   -0.01921    0.02369
AFIX  33
H18A  2    0.730271    0.723643    1.142740    11.00000   -1.50000
H18B  2    0.731942    0.665466    1.034868    11.00000   -1.50000
H18C  2    0.823068    0.752940    1.065512    11.00000   -1.50000
AFIX   0
C19   1    0.427618    0.788249    1.067275    11.00000    0.05939    0.05288 =
         0.05446    0.00981    0.03972    0.01004
AFIX  33
H19A  2    0.465222    0.764043    1.140024    11.00000   -1.50000
H19B  2    0.430502    0.855796    1.068939    11.00000   -1.50000
H19C  2    0.339322    0.767769    1.045199    11.00000   -1.50000
AFIX   0
C20   1    0.490990    0.648444    0.978188    11.00000    0.06909    0.03548 =
         0.03146    0.00711    0.00986   -0.00590
AFIX  33
H20A  2    0.529686    0.620780    1.048837    11.00000   -1.50000
H20B  2    0.401529    0.630572    0.957300    11.00000   -1.50000
H20C  2    0.535277    0.626665    0.922845    11.00000   -1.50000
AFIX   0

MOLE 2
S2    5   -0.137856    0.491193    0.184870    11.00000    0.02942    0.02396 =
         0.04062   -0.00503    0.00878    0.00417
O4    4   -0.050923    0.204744    0.364256    11.00000    0.02704    0.03751 =
         0.01898   -0.00193    0.00622    0.00403
O5    4    0.163422    0.227039    0.408930    11.00000    0.03215    0.04139 =
         0.02457   -0.00273    0.00203   -0.00727
O6    4    0.036984    0.646540    0.175560    11.00000    0.04358    0.02036 =
         0.05446   -0.00134   -0.00245    0.00356
B2    3    0.059968    0.207513    0.328297    11.00000    0.02055    0.01602 =
         0.02361    0.00018    0.00289    0.00264
C21   1    0.192817    0.569280    0.099995    11.00000    0.03336    0.02792 =
         0.03675    0.00764    0.00386   -0.00601
AFIX 137
H21A  2    0.168025    0.554079    0.022215    11.00000   -1.50000
H21B  2    0.250133    0.521618    0.138122    11.00000   -1.50000
H21C  2    0.236034    0.629102    0.109053    11.00000   -1.50000
AFIX   0
C22   1    0.076886    0.573935    0.146826    11.00000    0.02815    0.02164 =
         0.02683    0.00609   -0.00615    0.00190
C23   1    0.009505    0.487033    0.153988    11.00000    0.02182    0.02183 =
         0.02306   -0.00016    0.00201    0.00081
C24   1    0.041695    0.398155    0.133405    11.00000    0.02146    0.01843 =
         0.01967   -0.00106    0.00214    0.00158
AFIX  43
H24   2    0.119668    0.381907    0.115405    11.00000   -1.20000
AFIX   0
C25   1   -0.053878    0.333149    0.141876    11.00000    0.02772    0.02022 =
         0.01708   -0.00171    0.00238   -0.00378
C26   1   -0.044191    0.230415    0.124706    11.00000    0.02843    0.01666 =
         0.02122   -0.00053    0.00329   -0.00370
AFIX  23
H26A  2   -0.032449    0.219070    0.049897    11.00000   -1.20000
H26B  2   -0.124583    0.200721    0.131254    11.00000   -1.20000
AFIX   0
C27   1    0.066321    0.185872    0.207276    11.00000    0.02094    0.01830 =
         0.02349   -0.00285    0.00692   -0.00599
H27   2    0.136270    0.212092    0.192936    11.00000   -1.20000
C28   1    0.070406    0.081682    0.189306    11.00000    0.02577    0.02108 =
         0.01666   -0.00164    0.00198   -0.00055
C29   1    0.160855    0.041510    0.140846    11.00000    0.03507    0.02649 =
         0.02782   -0.00149    0.01036    0.00406
AFIX  43
H29   2    0.222455    0.079721    0.119456    11.00000   -1.20000
AFIX   0
C30   1    0.163813   -0.052670    0.122815    11.00000    0.05221    0.03015 =
         0.03569   -0.00922    0.00897    0.01275
AFIX  43
H30   2    0.226163   -0.077941    0.088588    11.00000   -1.20000
AFIX   0
C31   1    0.076532   -0.109807    0.154402    11.00000    0.06034    0.02054 =
         0.02543   -0.00200   -0.00459   -0.00020
AFIX  43
H31   2    0.078868   -0.174461    0.142774    11.00000   -1.20000
AFIX   0
C32   1   -0.014953   -0.071761    0.203468    11.00000    0.04714    0.02386 =
         0.02628    0.00399   -0.00233   -0.01294
AFIX  43
H32   2   -0.075951   -0.110372    0.225141    11.00000   -1.20000
AFIX   0
C33   1   -0.017005    0.023267    0.220822    11.00000    0.02859    0.02720 =
         0.02916    0.00056    0.00507   -0.00424
AFIX  43
H33   2   -0.079462    0.048578    0.254897    11.00000   -1.20000
AFIX   0
C34   1   -0.155185    0.374577    0.169896    11.00000    0.02703    0.02649 =
         0.03109   -0.00370    0.00613   -0.00487
AFIX  43
H34   2   -0.227876    0.341968    0.180042    11.00000   -1.20000
AFIX   0
PART 1
C35   1    0.099375    0.256111    0.505334    21.00000    0.02568    0.04378 =
         0.01623   -0.00711    0.00503    0.00081
C36   1   -0.026033    0.202131    0.483861    21.00000    0.02440    0.03126 =
         0.02070    0.00034    0.00723   -0.00240
C37   1    0.085417    0.360099    0.499557    21.00000    0.05196    0.04154 =
         0.03831   -0.02076    0.02141   -0.02400
AFIX  33
H37A  2    0.025826    0.377234    0.431777    21.00000   -1.50000
H37B  2    0.053284    0.382008    0.562097    21.00000   -1.50000
H37C  2    0.168115    0.388298    0.501062    21.00000   -1.50000
AFIX   0
C38   1    0.191851    0.227705    0.610335    21.00000    0.04355    0.09207 =
         0.03001   -0.00429   -0.00399   -0.00830
AFIX  33
H38A  2    0.199856    0.160376    0.612871    21.00000   -1.50000
H38B  2    0.274958    0.255394    0.612265    21.00000   -1.50000
H38C  2    0.160127    0.249104    0.673300    21.00000   -1.50000
AFIX   0
C39   1   -0.132305    0.250414    0.522419    21.00000    0.03690    0.04010 =
         0.03204   -0.00870    0.01714   -0.00471
AFIX  33
H39A  2   -0.115517    0.248596    0.602268    21.00000   -1.50000
H39B  2   -0.137466    0.314719    0.497829    21.00000   -1.50000
H39C  2   -0.212711    0.219177    0.492115    21.00000   -1.50000
AFIX   0
C40   1   -0.013078    0.102322    0.521147    21.00000    0.05952    0.03448 =
         0.03508    0.00707    0.01862    0.00421
AFIX  33
H40A  2    0.003568    0.099930    0.600970    21.00000   -1.50000
H40B  2   -0.091794    0.069146    0.490409    21.00000   -1.50000
H40C  2    0.057355    0.073460    0.496132    21.00000   -1.50000
AFIX   0
PART 2
SAME C35 > C40
C35X  1    0.136050    0.222422    0.511048   -21.00000    0.01651    0.02607 =
         0.02055    0.00316    0.00096   -0.00157
C36X  1   -0.006090    0.246707    0.477522   -21.00000    0.02657    0.02958 =
         0.01693   -0.00117    0.00994   -0.00740
C37X  1    0.218537    0.287820    0.588082   -21.00000    0.03613    0.05538 =
         0.03034   -0.00936    0.00826   -0.01802
AFIX  33
H37D  2    0.197967    0.283713    0.660056   -21.00000   -1.50000
H37E  2    0.307756    0.271528    0.594212   -21.00000   -1.50000
H37F  2    0.203765    0.350937    0.560296   -21.00000   -1.50000
AFIX   0
C38X  1    0.159295    0.124016    0.551059   -21.00000    0.05306    0.03664 =
         0.02539    0.00724    0.00333    0.00405
AFIX  33
H38D  2    0.140650    0.118444    0.623625   -21.00000   -1.50000
H38E  2    0.104150    0.082266    0.500362   -21.00000   -1.50000
H38F  2    0.248118    0.107697    0.555067   -21.00000   -1.50000
AFIX   0
C39X  1   -0.034338    0.350528    0.468398   -21.00000    0.04834    0.03405 =
         0.02231   -0.00370    0.01222    0.00231
AFIX  33
H39D  2    0.019054    0.379724    0.424364   -21.00000   -1.50000
H39E  2   -0.123797    0.360134    0.433564   -21.00000   -1.50000
H39F  2   -0.016300    0.377994    0.541441   -21.00000   -1.50000
AFIX   0
C40X  1   -0.088227    0.200485    0.545618   -21.00000    0.03426    0.04634 =
         0.02745   -0.00559    0.01416   -0.00768
AFIX  33
H40D  2   -0.065262    0.223862    0.620557   -21.00000   -1.50000
H40E  2   -0.177605    0.214134    0.514383   -21.00000   -1.50000
H40F  2   -0.074805    0.133638    0.545848   -21.00000   -1.50000
PART 0
AFIX   0
HKLF 4

REM  sad_b.res in P2(1)
REM R1 =  0.0500 for    8680 Fo > 4sig(Fo)  and  0.0565 for all    9584 data
REM    539 parameters refined using    523 restraints

END

WGHT      0.0398      1.1453

REM Instructions for potential hydrogen bonds
EQIV $1 -x, y-1/2, -z+1
HTAB C34 O3_$1
HTAB C37X O1

REM Highest difference peak  0.368,  deepest hole -0.386,  1-sigma level  0.046
Q1    1   0.4995  0.9542  0.7265  11.00000  0.05    0.37
Q2    1   0.6108  0.7286  0.9861  11.00000  0.05    0.35
Q3    1   0.5889  0.7711  0.8436  11.00000  0.05    0.33
Q4    1   0.4125  0.6680  0.6375  11.00000  0.05    0.31
Q5    1   0.4981  1.0462  0.7188  11.00000  0.05    0.29
Q6    1   0.6957  0.7682  0.9235  11.00000  0.05    0.28
Q7    1   0.6227  0.7394  0.8704  11.00000  0.05    0.28
Q8    1   0.0458  0.5291  0.1597  11.00000  0.05    0.27
Q9    1   0.5560  0.4692  0.6601  11.00000  0.05    0.26
Q10   1  -0.1580  0.4321  0.1687  11.00000  0.05    0.26
Q11   1   0.5789  0.6235  0.9680  11.00000  0.05    0.26
Q12   1   0.0416  0.1971  0.2590  11.00000  0.05    0.25
Q13   1   0.3072  0.6228  0.6744  11.00000  0.05    0.25
Q14   1   0.3486  0.5784  0.6739  11.00000  0.05    0.25
Q15   1   0.1026  0.0717  0.1392  11.00000  0.05    0.23
Q16   1   0.1129  0.2559  0.3667  11.00000  0.05    0.23
Q17   1   0.4542  1.0014  0.6727  11.00000  0.05    0.22
Q18   1   0.4669  0.8408  0.8999  11.00000  0.05    0.22
Q19   1   0.3272  0.4801  0.6815  11.00000  0.05    0.21
Q20   1   0.0380  0.4556  0.1196  11.00000  0.05    0.21
;
_shelx_res_checksum   81354

_shelx_hkl_file
;
   1   0   0   -3.40    0.20
   1   0   0   -4.20    0.20
   1   0   0   -3.90    0.10
  -1   0   0   -4.10    0.10
  -1   0   0   -4.00    0.10
  -1   0   0   -3.90    0.10
   1   0   0   -3.80    0.10
   1   0   0   -3.90    0.10
   1   0   0   -4.10    0.10
   1   0   0   -4.20    0.10
   2   0   0 3704.33   95.99
  -2   0   0 3675.73   95.89
   2   0   0 3464.45   96.39
   2   0   0 3663.13   95.89
   2   0   0 3723.33   95.99
   2   0   0 3738.33   95.99
   2   0   0 4028.00   96.69
  -2   0   0 3735.93   95.99
   2   0   0 3546.15   96.09
  -2   0   0 3690.53   96.19
  -2   0   0 3754.32   96.29
  -3   0   0   41.20    1.40
   3   0   0   44.60    1.60
  -3   0   0   43.50    1.40
   3   0   0   42.50    1.30
   3   0   0   40.40    1.40
   3   0   0   43.40    1.40
   3   0   0   42.20    1.40
   3   0   0   42.50    1.50
   3   0   0   41.80    1.40
   4   0   0    0.60    0.40
   4   0   0    1.20    0.30
   4   0   0    0.60    0.30
   4   0   0    0.60    0.30
  -4   0   0    1.00    0.30
   4   0   0    0.80    0.30
   4   0   0    0.70    0.40
   5   0   0   12.10    0.80
  -5   0   0   14.00    0.80
   5   0   0   12.60    1.00
   5   0   0   13.00    1.00
   5   0   0   13.30    0.80
   5   0   0   13.80    0.70
   5   0   0   12.30    0.70
  -6   0   0  303.47    8.50
   6   0   0  310.17    8.30
   6   0   0  312.87    8.70
   6   0   0  304.57    8.70
   6   0   0  298.07    8.40
   6   0   0  306.17    8.50
   7   0   0   48.80    2.10
   7   0   0   46.40    1.70
   7   0   0   49.00    1.90
   7   0   0   46.30    2.10
   7   0   0   45.20    1.80
   8   0   0    2.90    0.70
   8   0   0    2.60    0.60
   8   0   0    2.50    0.70
   8   0   0    3.00    0.50
   8   0   0    3.50    0.60
   9   0   0   25.70    1.50
   9   0   0   26.10    1.80
   9   0   0   23.80    1.70
  10   0   0   94.79    3.80
  10   0   0   94.39    3.80
  10   0   0   92.19    3.40
  11   0   0    3.40    0.80
  11   0   0    2.90    0.90
  11   0   0    2.00    0.90
  11   0   0    1.50    0.90
  12   0   0    0.10    0.80
  12   0   0    0.50    0.80
  12   0   0    0.40    0.70
  12   0   0    0.10    0.90
  13   0   0   -1.00    0.80
  13   0   0    1.00    0.70
  13   0   0    0.40    1.00
  13   0   0   -0.50    0.80
  14   0   0   15.40    1.90
  14   0   0   13.90    1.90
  14   0   0   11.90    1.80
   0  -1   0   -0.10    0.10
   0   1   0    0.00    0.10
   0   1   0   -0.10    0.10
   0   1   0   -0.10    0.10
   1  -1   0   46.90    1.30
   1  -1   0   44.80    1.30
  -1  -1   0   47.70    1.40
   1  -1   0   45.80    1.30
   1  -1   0   43.70    1.30
   1  -1   0   43.70    1.30
   1  -1   0   44.30    1.30
  -1   1   0   46.50    1.30
  -1   1   0   43.30    1.30
  -1   1   0   46.30    1.30
  -1   1   0   45.10    1.30
   2  -1   0  825.22   20.50
  -2  -1   0  755.02   20.60
   2  -1   0  812.02   20.60
  -2  -1   0  738.03   20.50
   2  -1   0  801.62   20.60
   2  -1   0  787.32   20.60
   2  -1   0  811.52   20.60
   2  -1   0  791.72   20.50
  -2   1   0  823.52   20.70
   2   1   0  806.72   20.70
  -2   1   0  789.32   20.70
   2   1   0  762.42   20.80
   2   1   0  824.82   20.80
   2   1   0  773.92   20.60
  -2   1   0  833.12   20.80
   2   1   0  798.52   20.70
   2   1   0  781.12   20.70
   2   1   0  791.92   20.80
   3  -1   0  237.48    6.30
   3  -1   0  229.48    6.30
   3  -1   0  231.98    6.40
  -3  -1   0  232.38    6.50
   3  -1   0  225.48    6.30
   3  -1   0  233.38    6.10
   3   1   0  224.68    6.10
   3   1   0  236.98    6.40
   3   1   0  217.48    6.10
   3   1   0  227.68    6.10
   3   1   0  238.08    6.10
  -3   1   0  239.98    6.30
  -3   1   0  236.48    6.40
   3   1   0  221.08    6.30
   3   1   0  231.28    6.20
  -3   1   0  239.28    6.30
   4  -1   0  341.67    9.30
   4  -1   0  356.56    9.20
   4  -1   0  344.27    9.50
  -4  -1   0  345.57    9.60
   4  -1   0  350.46    9.50
   4  -1   0  355.36    9.30
   4  -1   0  335.07    9.40
   4   1   0  339.57    9.30
   4   1   0  352.76    9.20
   4   1   0  356.76    9.20
  -4   1   0  347.57    9.50
  -4   1   0  352.86    9.30
  -4   1   0  352.36    9.40
   4   1   0  356.86    9.20
   4   1   0  347.37    9.50
   4   1   0  347.57    9.50
   4   1   0  339.67    9.30
   5  -1   0  147.29    4.50
   5  -1   0  139.29    4.20
   5  -1   0  142.09    4.40
   5  -1   0  153.88    4.10
   5  -1   0  148.29    4.20
   5  -1   0  144.49    4.30
   5   1   0  135.99    4.20
   5   1   0  133.79    3.90
   5   1   0  136.89    3.90
  -5   1   0  142.99    4.10
   5   1   0  131.89    3.90
   5   1   0  139.99    3.90
   5   1   0  142.09    3.90
   5   1   0  134.29    4.20
   6  -1   0  369.16   10.30
   6  -1   0  388.46   10.10
   6  -1   0  363.86   10.50
   6  -1   0  381.16   10.50
   6  -1   0  377.46   10.30
   6   1   0  383.46   10.10
   6   1   0  382.26   10.20
   6   1   0  378.46   10.60
   6   1   0  376.56   10.20
  -6   1   0  377.56   10.40
   6   1   0  378.06   10.20
   6   1   0  376.96   10.60
   7  -1   0    8.80    0.90
   7  -1   0    9.50    1.10
   7  -1   0    9.50    1.10
   7  -1   0    7.90    0.80
   7  -1   0   11.20    0.70
   7   1   0   10.50    0.80
   7   1   0    8.30    1.00
   7   1   0    9.20    0.70
   7   1   0    8.00    1.00
  -7   1   0    9.50    0.80
   7   1   0    8.70    0.70
   8  -1   0   44.80    2.00
   8  -1   0   41.40    1.60
   8  -1   0   41.80    1.80
   8  -1   0   41.50    2.10
   8  -1   0   41.90    2.10
   8   1   0   39.10    2.00
   8   1   0   43.00    2.10
   8   1   0   39.60    1.60
   8   1   0   40.40    1.60
  -8   1   0   38.10    1.80
   8   1   0   39.30    1.70
   9  -1   0    1.90    0.70
   9  -1   0    3.20    0.90
   9  -1   0    2.10    0.80
   9   1   0    2.30    0.80
  -9   1   0    3.10    0.70
   9   1   0    2.50    0.50
   9   1   0    2.50    0.80
   9   1   0    1.90    0.50
  10  -1   0   15.70    1.70
  10  -1   0   11.10    1.40
  10  -1   0   11.40    1.20
  10   1   0   11.10    1.10
  10   1   0   10.20    1.30
  10   1   0   12.30    1.40
  11  -1   0   15.90    1.80
  11  -1   0   18.30    1.70
  11  -1   0   13.40    1.60
  11  -1   0   17.20    1.50
  11   1   0   17.50    1.80
  11   1   0   16.40    1.70
  11   1   0   14.60    1.20
  11   1   0   15.20    1.70
  12  -1   0   37.50    2.50
  12  -1   0   39.60    2.50
  12  -1   0   32.20    2.10
  12  -1   0   33.70    2.40
  12   1   0   33.40    1.90
  12   1   0   41.20    2.60
  12   1   0   37.90    2.40
  12   1   0   41.40    2.50
  13  -1   0    4.60    1.10
  13  -1   0    4.00    1.20
  13  -1   0    6.60    1.30
  13  -1   0    3.00    1.20
  13   1   0    3.80    1.20
  13   1   0    5.50    1.30
  13   1   0    5.10    1.20
  14  -1   0    1.40    1.00
  14  -1   0   -0.80    0.90
  14  -1   0   -0.10    1.00
  14  -1   0   -0.70    0.70
  14   1   0    0.60    1.00
  14   1   0   -0.20    1.00
  14   1   0   -0.70    1.00
   0  -2   0   57.69    1.60
   0  -2   0   56.49    1.60
   0  -2   0   57.29    1.60
   0   2   0   62.29    1.60
   0   2   0   57.09    1.60
   0   2   0   56.59    1.70
   0   2   0   54.89    1.60
   1  -2   0  122.99    3.30
   1  -2   0  118.89    3.30
  -1  -2   0  101.89    3.30
   1  -2   0  121.59    3.40
   1  -2   0  120.99    3.30
   1  -2   0  122.99    3.30
  -1  -2   0  127.59    3.10
  -1   2   0  119.69    3.30
   1   2   0  121.09    3.30
  -1   2   0  125.69    3.30
   1   2   0  120.69    3.30
  -1   2   0  122.49    3.30
   2  -2   0  107.09    3.00
   2  -2   0  102.19    3.00
   2  -2   0  101.59    2.90
  -2  -2   0  105.09    3.00
   2  -2   0  102.79    3.00
   2  -2   0  104.59    3.00
   2  -2   0  100.89    3.00
  -2   2   0   98.49    2.90
  -2   2   0  105.69    2.90
  -2   2   0  100.39    2.90
   3  -2   0   28.90    1.00
   3  -2   0   27.70    1.10
   3  -2   0   28.60    1.20
   3  -2   0   28.70    1.20
  -3  -2   0   25.70    1.20
   3  -2   0   27.10    1.20
   3  -2   0   25.80    1.10
  -3   2   0   28.00    1.10
   3   2   0   25.50    0.80
   3   2   0   26.20    0.80
   3   2   0   25.50    0.80
   3   2   0   27.90    1.10
   3   2   0   26.40    0.80
   3   2   0   23.80    1.00
   3   2   0   23.90    1.10
  -3   2   0   29.10    1.10
   4  -2   0   95.19    2.70
  -4  -2   0   91.99    3.00
   4  -2   0   91.69    2.90
   4  -2   0   92.09    3.00
   4  -2   0   89.69    2.80
   4  -2   0   90.59    2.90
   4  -2   0   92.89    2.80
   4   2   0   87.69    2.50
   4   2   0   89.89    2.90
   4   2   0   95.89    2.90
  -4   2   0   92.59    2.80
   4   2   0   90.69    2.50
  -4   2   0   92.19    2.80
   4   2   0   88.39    2.50
   4   2   0   87.59    2.70
   4   2   0   92.39    2.50
   5  -2   0   18.10    1.00
   5  -2   0   17.00    0.90
   5  -2   0   17.20    1.10
  -5  -2   0   19.90    1.20
   5  -2   0   18.00    1.10
   5  -2   0   18.70    1.10
   5  -2   0   17.30    0.80
  -5   2   0   19.30    1.10
  -5   2   0   17.80    1.00
   5   2   0   17.40    0.90
  -5   2   0   18.30    1.00
   5   2   0   18.50    1.10
   5   2   0   18.50    0.80
   5   2   0   17.10    0.80
   5   2   0   18.20    1.10
   5   2   0   18.20    0.70
   6  -2   0   85.29    2.60
   6  -2   0   86.39    3.00
   6  -2   0   86.59    3.00
   6  -2   0   81.19    2.90
   6  -2   0   84.49    2.80
   6   2   0   84.19    2.50
   6   2   0   86.49    3.00
  -6   2   0   81.79    2.80
   6   2   0   82.39    2.60
   6   2   0   82.49    2.50
   6   2   0   85.39    3.00
   6   2   0   79.89    2.50
  -6   2   0   83.59    2.70
   7  -2   0   29.50    1.70
   7  -2   0   30.90    1.70
   7  -2   0   29.40    1.20
   7  -2   0   30.20    1.50
   7  -2   0   31.50    1.60
   7   2   0   32.50    1.20
   7   2   0   31.10    1.30
   7   2   0   28.30    1.30
   7   2   0   31.80    1.70
   7   2   0   30.80    1.30
   7   2   0   32.40    1.70
  -7   2   0   29.70    1.50
   8  -2   0   48.30    2.30
   8  -2   0   48.00    2.20
   8  -2   0   49.70    1.70
   8  -2   0   44.80    2.00
   8  -2   0   50.09    2.30
   8   2   0   46.30    2.20
   8   2   0   49.70    2.30
   8   2   0   46.30    1.80
   8   2   0   45.50    1.80
   8   2   0   48.20    1.80
  -8   2   0   49.90    2.10
   9  -2   0   28.90    1.90
   9  -2   0   31.30    1.80
   9  -2   0   28.50    1.90
  -9   2   0   31.50    1.70
   9   2   0   27.50    1.80
   9   2   0   29.10    1.40
   9   2   0   30.00    1.40
   9   2   0   27.40    1.90
  10  -2   0    8.20    1.10
  10  -2   0    6.50    1.20
  10  -2   0    9.00    1.20
 -10   2   0    9.00    1.10
  10   2   0    9.20    1.30
  10   2   0    8.70    1.30
  10   2   0    9.30    0.90
  11  -2   0    2.00    0.90
  11  -2   0    3.00    1.00
  11  -2   0    1.90    0.90
  11  -2   0    1.10    0.70
  11   2   0    0.50    0.70
  11   2   0    2.30    1.00
  11   2   0    1.80    0.90
  11   2   0    1.90    0.60
  12  -2   0   -0.20    0.90
  12  -2   0    0.20    0.80
  12  -2   0    2.00    1.00
  12  -2   0    0.40    0.80
  12   2   0    1.30    0.90
  12   2   0    0.60    0.80
  12   2   0    0.70    0.90
  13  -2   0    7.00    1.40
  13  -2   0    6.20    1.30
  13  -2   0    5.80    1.20
  13  -2   0    4.70    1.30
  13   2   0    5.60    1.30
  13   2   0    5.50    1.40
  13   2   0    4.80    1.30
  14  -2   0    1.60    1.00
  14  -2   0   -0.60    0.90
  14  -2   0    1.10    1.10
  14  -2   0    0.80    1.10
  14   2   0    1.60    1.20
  14   2   0    2.20    1.20
  14   2   0    1.50    1.10
   0  -3   0    0.10    0.20
   0  -3   0    0.00    0.30
   0  -3   0    0.10    0.20
   0   3   0   -0.20    0.20
   0   3   0    0.10    0.20
   0   3   0   -0.10    0.20
   0   3   0    0.00    0.20
   1  -3   0  457.15   12.00
   1  -3   0  466.45   12.20
   1  -3   0  454.45   12.20
  -1  -3   0  455.65   12.20
  -1  -3   0  470.75   12.00
  -1   3   0  472.25   12.20
  -1   3   0  459.15   12.20
   1   3   0  457.65   12.10
  -1   3   0  475.55   12.10
  -1   3   0  466.25   12.20
   1   3   0  450.05   12.00
   1   3   0  456.25   12.00
   2  -3   0   65.39    1.90
  -2  -3   0   63.99    2.00
   2  -3   0   61.89    2.00
   2  -3   0   60.19    2.00
   2  -3   0   60.09    2.10
   2  -3   0   65.79    2.00
  -2   3   0   65.59    2.00
  -2   3   0   66.59    2.00
  -2   3   0   62.49    2.00
   2   3   0   62.79    1.90
   3  -3   0   69.99    2.00
  -3  -3   0   62.39    2.30
   3  -3   0   67.09    2.20
   3  -3   0   65.89    2.20
   3  -3   0   68.29    2.30
   3  -3   0   72.59    2.30
   3   3   0   67.49    2.20
  -3   3   0   71.29    2.20
  -3   3   0   68.29    2.20
   4  -3   0   12.80    0.80
   4  -3   0   12.90    0.70
   4  -3   0   12.80    0.90
  -4  -3   0   13.40    0.90
   4  -3   0   12.40    0.90
   4  -3   0   12.50    0.90
   4   3   0   11.10    0.50
   4   3   0   10.10    0.80
  -4   3   0   11.90    0.80
   4   3   0   12.50    0.80
   4   3   0   11.60    0.70
  -4   3   0   11.80    0.80
   5  -3   0  171.38    5.20
   5  -3   0  170.48    5.20
   5  -3   0  177.38    5.30
   5  -3   0  175.38    4.90
   5  -3   0  178.78    5.10
  -5  -3   0  176.68    5.40
   5   3   0  171.28    5.20
   5   3   0  177.58    4.70
  -5   3   0  172.48    5.20
   5   3   0  175.18    5.20
   5   3   0  176.08    5.00
  -5   3   0  170.68    5.10
   5   3   0  175.08    4.70
   5   3   0  177.48    4.60
  -6  -3   0   21.70    1.30
   6  -3   0   19.70    1.20
   6  -3   0   19.70    1.20
   6  -3   0   18.20    1.20
   6  -3   0   22.20    1.30
   6  -3   0   23.20    1.00
   6   3   0   20.90    0.80
  -6   3   0   21.20    1.20
   6   3   0   21.00    0.80
  -6   3   0   22.00    1.30
  -6   3   0   21.50    1.20
   6   3   0   21.40    0.90
   6   3   0   23.60    1.30
   6   3   0   23.20    1.30
   6   3   0   20.50    1.10
  -7  -3   0    4.30    0.80
   7  -3   0    4.40    0.80
   7  -3   0    5.60    0.70
   7  -3   0    5.70    0.80
   7  -3   0    5.00    0.50
   7  -3   0    5.00    0.80
  -7   3   0    4.30    0.70
   7   3   0    5.60    0.90
   7   3   0    5.20    0.50
   7   3   0    5.30    0.50
   7   3   0    5.00    0.60
   7   3   0    5.10    0.80
   7   3   0    5.10    0.40
   8  -3   0    3.10    0.50
   8  -3   0    2.70    0.70
   8  -3   0    3.30    0.80
   8  -3   0    2.00    0.70
  -8   3   0    3.20    0.70
   8   3   0    2.70    0.50
   8   3   0    2.90    0.80
   8   3   0    2.80    0.70
   8   3   0    2.90    0.50
   8   3   0    2.20    0.40
   9  -3   0   15.50    1.50
   9  -3   0   18.20    1.50
   9  -3   0   16.60    1.60
   9   3   0   16.10    1.10
   9   3   0   18.70    1.60
   9   3   0   14.50    1.40
  -9   3   0   16.60    1.30
   9   3   0   16.30    0.90
  10  -3   0   14.80    1.50
  10  -3   0   12.10    1.40
  10  -3   0   14.00    1.60
  10   3   0   15.00    1.70
  10   3   0   17.70    1.70
 -10   3   0   14.10    1.30
  10   3   0   13.30    0.90
  11  -3   0    3.40    1.00
  11  -3   0    5.20    1.20
  11  -3   0    2.90    1.00
  11  -3   0    4.10    1.00
  11   3   0    4.10    1.00
 -11   3   0    3.90    0.90
  11   3   0    2.60    1.00
  11   3   0    3.30    1.00
  12  -3   0    2.50    1.10
  12  -3   0    5.20    1.30
  12  -3   0    4.90    1.10
  12  -3   0    4.00    1.00
  12   3   0    3.60    1.10
  12   3   0    4.50    1.10
  12   3   0    3.70    1.10
  13  -3   0    2.00    1.10
  13  -3   0    1.70    1.00
  13  -3   0    1.30    1.00
  13  -3   0    2.30    1.00
  13   3   0    1.80    1.10
  13   3   0    1.60    1.00
  13   3   0    0.90    0.90
   0  -4   0  195.88    5.40
   0  -4   0  195.08    5.20
   0  -4   0  193.38    5.30
   0   4   0  187.28    5.20
   0   4   0  185.58    5.10
   0   4   0  189.58    5.10
   0   4   0  190.98    5.10
   1  -4   0  595.24   15.60
   1  -4   0  601.94   15.60
   1  -4   0  599.44   15.20
  -1  -4   0  587.24   15.40
  -1  -4   0  572.64   15.60
   1  -4   0  586.44   15.40
   1   4   0  585.94   15.40
   1   4   0  608.24   15.40
  -1   4   0  586.34   15.60
   1   4   0  570.74   15.50
  -1   4   0  598.24   15.60
  -1   4   0  577.84   15.50
  -1   4   0  620.14   15.50
  -2  -4   0   65.79    1.80
  -2  -4   0   63.69    2.10
   2  -4   0   63.59    2.10
   2  -4   0   66.09    2.20
   2  -4   0   62.29    2.00
  -2   4   0   64.59    2.10
   2   4   0   65.19    1.90
  -2   4   0   62.59    2.00
   2   4   0   62.49    1.80
   2   4   0   67.19    2.00
  -2   4   0   68.29    2.10
   3  -4   0   61.69    2.00
   3  -4   0   58.29    2.00
   3  -4   0   58.79    2.10
   3  -4   0   62.09    2.10
   3  -4   0   58.29    1.90
  -3  -4   0   59.39    2.10
  -3   4   0   62.39    2.10
   3   4   0   62.49    2.00
  -3   4   0   59.59    2.00
  -4  -4   0   68.59    2.50
   4  -4   0   66.49    2.30
   4  -4   0   68.79    2.10
   4  -4   0   64.09    2.40
   4  -4   0   66.99    2.30
   4  -4   0   70.99    2.50
   4   4   0   64.59    2.30
  -4   4   0   69.09    2.30
  -4   4   0   67.99    2.30
   4   4   0   66.79    2.30
   5  -4   0    4.60    0.60
   5  -4   0    5.10    0.50
   5  -4   0    4.60    0.70
  -5  -4   0    6.00    0.80
   5  -4   0    4.20    0.70
   5  -4   0    3.80    0.60
  -5   4   0    5.20    0.70
  -5   4   0    6.20    0.70
   5   4   0    4.80    0.60
   5   4   0    4.60    0.30
  -5   4   0    4.30    0.60
   5   4   0    4.70    0.60
   5   4   0    5.30    0.70
   6  -4   0   54.39    2.30
   6  -4   0   50.19    2.20
   6  -4   0   55.49    2.20
  -6  -4   0   51.89    2.30
   6  -4   0   53.39    1.80
   6  -4   0   56.09    2.30
  -6   4   0   52.79    2.20
   6   4   0   51.99    1.60
  -6   4   0   56.99    2.10
  -6   4   0   57.59    2.10
   6   4   0   54.89    2.00
   6   4   0   53.09    2.20
   6   4   0   51.69    2.20
  -7  -4   0   56.49    2.50
   7  -4   0   56.09    2.40
   7  -4   0   51.89    2.40
   7  -4   0   49.10    2.30
   7  -4   0   51.29    1.80
   7   4   0   52.79    1.70
   7   4   0   47.60    2.20
   7   4   0   53.29    2.00
  -7   4   0   53.19    2.30
  -7   4   0   50.09    2.10
   7   4   0   54.29    2.30
   8  -4   0   42.90    2.20
  -8  -4   0   39.60    2.20
   8  -4   0   43.20    1.60
   8  -4   0   41.00    2.10
   8  -4   0   44.30    2.20
   8   4   0   41.70    2.10
  -8   4   0   41.90    2.00
   8   4   0   37.00    1.70
   8   4   0   40.90    1.30
   8   4   0   39.40    2.10
   8   4   0   42.80    1.50
   9  -4   0   17.90    1.70
   9  -4   0   17.40    1.50
   9  -4   0   18.60    1.60
  -9   4   0   16.30    1.30
   9   4   0   16.80    1.10
   9   4   0   15.80    1.40
   9   4   0   17.20    1.50
   9   4   0   17.60    0.80
  10  -4   0   11.30    1.40
  10  -4   0    9.50    1.30
  10  -4   0   12.50    1.50
 -10   4   0    9.50    1.10
  10   4   0   10.80    1.40
  10   4   0   11.00    1.40
  11  -4   0    6.70    1.20
  11  -4   0    5.90    1.20
  11  -4   0    6.80    1.20
  11  -4   0    7.50    1.20
 -11   4   0    9.70    1.20
  11   4   0    7.30    1.30
  11   4   0    7.60    1.30
  11   4   0    8.10    1.30
  12  -4   0    5.20    1.20
  12  -4   0    4.50    1.20
  12  -4   0    6.00    1.30
  12  -4   0    6.90    1.40
 -12   4   0    4.90    1.00
  12   4   0    7.10    1.30
  12   4   0    5.00    1.20
  12   4   0    2.20    1.00
  13  -4   0   -0.90    0.90
  13  -4   0    0.30    1.00
  13  -4   0   -0.70    0.90
  13  -4   0    0.00    0.90
  13   4   0    0.40    1.00
  13   4   0    0.40    0.80
  13   4   0   -0.70    0.80
   0  -5   0    0.10    0.30
   0  -5   0    0.00    0.30
   0  -5   0   -0.30    0.30
   0  -5   0    0.30    0.20
   0   5   0    0.10    0.20
   0   5   0    0.00    0.20
   0   5   0   -0.40    0.20
   0   5   0    0.70    0.30
   1  -5   0    9.10    0.70
  -1  -5   0   10.00    0.60
  -1  -5   0    9.90    0.70
   1  -5   0    9.40    0.50
   1  -5   0   10.30    0.70
  -1   5   0   11.30    0.60
   1   5   0   10.50    0.50
   1   5   0   12.00    0.70
   1   5   0   10.20    0.40
  -1   5   0   10.60    0.70
  -1   5   0   11.20    0.70
  -1   5   0    9.40    0.70
   1   5   0    9.50    0.50
  -2  -5   0  176.88    4.60
  -2  -5   0  166.88    5.00
   2  -5   0  172.68    4.80
   2  -5   0  164.68    4.90
   2  -5   0  174.98    5.00
  -2   5   0  169.58    4.80
  -2   5   0  171.68    4.90
   2   5   0  170.68    4.70
   2   5   0  166.48    4.50
   2   5   0  173.08    4.80
  -2   5   0  165.98    4.80
   3  -5   0   15.70    0.80
   3  -5   0   15.10    0.90
   3  -5   0   12.90    1.00
  -3  -5   0   13.70    0.90
   3  -5   0   15.10    0.90
   3   5   0   16.60    0.80
   3   5   0   13.70    0.50
  -3   5   0   14.10    0.90
  -3   5   0   15.60    0.90
   3   5   0   14.60    0.80
   4  -5   0   95.09    2.80
  -4  -5   0   87.29    3.10
   4  -5   0   88.59    3.10
   4  -5   0   97.59    3.10
   4  -5   0   88.29    2.90
   4   5   0   94.19    2.90
  -4   5   0   96.79    3.00
   4   5   0   87.89    3.00
  -4   5   0   92.69    3.00
   5  -5   0   20.90    1.20
  -5  -5   0   21.40    1.30
   5  -5   0   22.10    1.30
   5  -5   0   21.00    1.00
   5  -5   0   22.70    1.40
   5   5   0   20.50    1.20
  -5   5   0   21.00    1.20
  -5   5   0   21.80    1.20
  -5   5   0   21.70    1.20
   5   5   0   22.00    1.10
   6  -5   0   64.29    2.50
   6  -5   0   66.39    2.20
   6  -5   0   63.59    2.60
  -6  -5   0   61.79    2.60
   6  -5   0   65.49    2.60
   6   5   0   69.09    2.60
   6   5   0   66.39    1.90
  -6   5   0   66.79    2.60
  -6   5   0   69.49    2.50
  -6   5   0   66.49    2.50
   6   5   0   63.29    2.40
   6   5   0   64.89    2.60
   7  -5   0    3.60    0.80
   7  -5   0    3.50    0.90
   7  -5   0    3.00    0.70
   7  -5   0    4.60    0.60
  -7  -5   0    5.20    1.00
  -7   5   0    3.80    0.80
  -7   5   0    4.20    0.70
   7   5   0    3.80    0.80
   7   5   0    2.90    0.70
   7   5   0    4.00    0.40
   7   5   0    4.00    0.60
   8  -5   0   22.30    1.60
   8  -5   0   20.20    1.60
   8  -5   0   19.80    1.10
   8  -5   0   23.10    1.60
  -8  -5   0   18.40    1.50
   8   5   0   23.20    1.60
   8   5   0   20.50    1.30
   8   5   0   20.60    1.50
  -8   5   0   20.90    1.40
   9  -5   0    7.20    1.20
   9  -5   0    8.00    1.20
   9  -5   0    7.20    1.20
   9   5   0    6.90    0.90
  -9   5   0    5.90    0.90
   9   5   0    6.30    1.10
   9   5   0    7.70    1.20
  10  -5   0    4.90    1.00
  10  -5   0    6.20    1.20
  10  -5   0    4.40    1.10
  10  -5   0    3.50    1.00
  10   5   0    2.70    0.90
  10   5   0    5.80    1.10
  10   5   0    2.00    0.90
 -10   5   0    4.00    0.90
  11  -5   0    0.70    0.80
  11  -5   0    1.20    0.90
  11  -5   0    0.50    0.90
  11  -5   0    0.30    0.80
 -11   5   0    0.30    0.70
  11   5   0    0.80    0.80
  11   5   0    1.00    0.80
  11   5   0    1.50    0.80
  12  -5   0   10.80    1.60
  12  -5   0    8.60    1.50
  12  -5   0    9.20    1.50
  12  -5   0   10.60    1.50
  12   5   0    7.60    1.40
 -12   5   0   10.00    1.40
  12   5   0    8.90    1.50
  12   5   0   11.00    1.50
  13  -5   0    3.70    1.30
  13  -5   0    5.00    1.30
  13  -5   0    4.30    1.30
  13  -5   0    4.60    1.30
  13   5   0    2.00    1.10
  13   5   0    6.90    1.40
  13   5   0    5.20    1.30
   0  -6   0   49.50    1.90
   0  -6   0   51.99    1.60
   0  -6   0   51.89    1.80
   0   6   0   56.99    1.80
   0   6   0   57.19    1.90
   0   6   0   54.59    1.90
   0   6   0   54.89    1.90
  -1  -6   0  716.13   18.80
  -1  -6   0  712.83   19.00
   1  -6   0  722.83   19.00
   1  -6   0  719.33   19.00
   1  -6   0  715.43   18.70
   1   6   0  722.73   18.60
   1   6   0  715.33   19.00
  -1   6   0  737.53   19.00
   1   6   0  704.63   18.80
  -1   6   0  713.33   19.00
  -1   6   0  735.13   18.90
   1   6   0  740.63   18.90
  -1   6   0  709.53   19.00
   1   6   0  708.13   18.80
   2  -6   0   57.19    1.80
  -2  -6   0   52.99    2.00
   2  -6   0   54.79    2.10
   2  -6   0   51.19    2.00
   2  -6   0   53.79    1.60
  -2  -6   0   52.49    1.70
   2   6   0   55.19    1.90
   2   6   0   58.09    1.70
  -2   6   0   52.09    2.00
  -2   6   0   52.09    1.80
  -2   6   0   54.09    2.00
   2   6   0   51.49    1.70
   2   6   0   53.79    1.70
   3  -6   0   23.10    1.10
  -3  -6   0   28.00    1.30
  -3  -6   0   23.10    0.90
   3  -6   0   24.90    1.30
   3  -6   0   28.90    1.40
  -3   6   0   24.10    1.20
   3   6   0   25.90    1.00
  -3   6   0   25.30    1.20
   3   6   0   24.90    1.10
   3   6   0   26.50    0.90
  -4  -6   0    1.00    0.50
   4  -6   0    1.50    0.50
   4  -6   0    0.90    0.40
   4  -6   0    1.20    0.50
   4   6   0    1.90    0.40
  -4   6   0    1.40    0.50
  -4   6   0    0.60    0.40
   4   6   0    1.20    0.40
  -4   6   0    1.80    0.50
   5  -6   0   19.40    1.00
  -5  -6   0   18.60    1.30
   5  -6   0   18.30    1.30
   5  -6   0   21.00    1.40
   5  -6   0   21.50    1.20
  -5   6   0   19.30    1.20
  -5   6   0   22.60    1.30
   5   6   0   18.50    1.10
   5   6   0   20.10    1.20
  -5   6   0   20.50    1.20
   6  -6   0   20.40    1.50
  -6  -6   0   20.70    1.40
   6  -6   0   20.00    1.30
   6  -6   0   21.20    1.40
   6  -6   0   20.90    1.10
   6   6   0   22.20    1.20
   6   6   0   20.20    1.30
   6   6   0   20.90    1.30
  -6   6   0   18.90    1.20
  -6   6   0   19.90    1.30
  -6   6   0   20.20    1.30
   6   6   0   21.60    1.20
   7  -6   0   24.30    1.70
  -7  -6   0   29.50    1.80
   7  -6   0   22.90    1.50
   7  -6   0   27.70    1.70
   7  -6   0   26.00    1.20
   7   6   0   29.10    1.70
  -7   6   0   27.00    1.60
  -7   6   0   29.50    1.70
   7   6   0   28.10    1.60
   7   6   0   28.70    1.50
   8  -6   0   65.29    2.50
   8  -6   0   67.29    2.90
  -8  -6   0   63.39    3.00
   8  -6   0   64.79    2.80
   8  -6   0   65.29    3.00
  -8   6   0   65.39    2.60
   8   6   0   63.69    2.50
   8   6   0   61.79    2.70
  -8   6   0   60.79    2.80
   8   6   0   59.79    2.70
   9  -6   0   30.90    2.10
  -9  -6   0   34.30    2.20
   9  -6   0   33.60    2.10
   9  -6   0   35.40    1.90
   9  -6   0   30.00    2.00
   9   6   0   31.00    2.00
   9   6   0   34.00    2.00
   9   6   0   35.00    2.00
  -9   6   0   28.90    1.80
   9   6   0   33.90    1.80
  10  -6   0    2.60    1.00
  10  -6   0    3.80    1.00
  10  -6   0    2.50    0.80
  10  -6   0    2.10    0.90
  10   6   0    3.70    1.00
 -10   6   0    4.20    0.90
  10   6   0    2.90    0.90
  10   6   0    4.00    1.00
  11  -6   0   10.20    1.60
  11  -6   0    9.80    1.50
  11  -6   0    8.90    1.30
  11  -6   0    7.90    1.40
  11   6   0   11.40    1.50
 -11   6   0   10.20    1.30
  11   6   0   10.30    1.40
  11   6   0    7.80    1.30
  12  -6   0    3.70    1.20
  12  -6   0    6.10    1.30
  12  -6   0    1.70    1.00
  12  -6   0    3.00    1.10
 -12   6   0    4.90    1.10
  12   6   0    3.50    1.10
  12   6   0    0.70    1.00
  12   6   0    3.20    1.00
  13  -6   0    0.50    1.00
  13  -6   0   -1.30    0.90
  13  -6   0   -0.90    0.90
  13  -6   0   -0.60    1.00
  13   6   0    0.50    1.00
  13   6   0   -0.30    0.90
  13   6   0    0.50    0.80
   0  -7   0    2.00    0.30
   0  -7   0    0.30    0.40
   0  -7   0   -0.40    0.40
   0  -7   0    0.30    0.40
   0   7   0   -0.30    0.30
   0   7   0   -0.50    0.20
   0   7   0    0.20    0.30
   0   7   0    0.00    0.40
  -1  -7   0   73.69    2.30
   1  -7   0   71.19    2.50
  -1  -7   0   71.09    2.50
   1  -7   0   73.19    2.20
   1  -7   0   70.69    2.50
  -1   7   0   72.19    2.20
   1   7   0   72.29    2.00
  -1   7   0   70.09    2.40
  -1   7   0   72.49    2.40
   1   7   0   68.69    2.20
   1   7   0   71.79    2.20
   1   7   0   66.49    2.40
   1   7   0   73.69    2.30
  -1   7   0   71.29    2.40
  -2  -7   0   72.69    2.20
   2  -7   0   70.69    2.00
   2  -7   0   70.19    2.30
   2  -7   0   69.79    2.60
   2  -7   0   72.89    2.50
  -2  -7   0   70.69    2.50
   2   7   0   74.99    2.30
  -2   7   0   75.59    2.40
   2   7   0   77.69    2.50
   2   7   0   74.39    2.30
   2   7   0   73.69    2.20
  -2   7   0   71.79    2.50
  -3  -7   0    5.40    0.40
  -3  -7   0    6.40    0.80
   3  -7   0    4.80    0.70
   3  -7   0    6.30    0.60
   3  -7   0    5.50    0.70
   3  -7   0    6.30    0.50
  -3   7   0    6.60    0.70
   3   7   0    6.10    0.50
   3   7   0    6.00    0.50
   3   7   0    6.60    0.40
  -3   7   0    5.90    0.70
   3   7   0    5.30    0.60
   4  -7   0    5.70    0.80
   4  -7   0    7.10    0.90
  -4  -7   0    7.10    0.90
   4  -7   0    7.20    0.70
  -4   7   0    5.60    0.70
   4   7   0    7.00    0.60
   4   7   0    7.10    0.40
   4   7   0    7.00    0.70
  -4   7   0    7.90    0.80
  -4   7   0    8.90    0.90
   5  -7   0    6.20    0.90
   5  -7   0    6.80    0.80
  -5  -7   0    6.20    0.90
   5  -7   0    8.50    1.10
  -5   7   0    8.10    0.90
   5   7   0    7.20    0.70
  -5   7   0    8.00    0.90
   5   7   0    8.30    0.80
   5   7   0    7.30    0.80
  -5   7   0    8.00    0.90
  -6  -7   0    4.00    0.80
   6  -7   0    7.70    1.10
   6  -7   0    4.80    0.80
   6  -7   0    3.30    0.80
   6   7   0    4.70    0.80
  -6   7   0    5.00    0.80
   6   7   0    4.60    0.70
   6   7   0    4.00    0.60
  -6   7   0    3.50    0.70
  -6   7   0    3.00    0.70
   6   7   0    3.60    0.60
   6   7   0    3.60    0.70
  -7  -7   0    9.20    1.20
   7  -7   0    8.40    1.00
   7  -7   0    9.00    1.30
   7  -7   0    9.10    1.20
   7   7   0    9.20    0.90
   7   7   0    9.00    1.10
  -7   7   0    9.30    1.10
   7   7   0    7.90    1.00
  -7   7   0   10.10    1.10
   7   7   0    8.30    1.10
   8  -7   0    4.90    0.90
   8  -7   0    6.50    1.20
  -8  -7   0    5.60    1.10
   8  -7   0    5.90    1.10
   8  -7   0    5.70    1.00
   8   7   0    5.50    0.90
   8   7   0    5.90    1.00
   8   7   0    4.50    0.90
   8   7   0    4.00    0.90
   8   7   0    5.60    0.80
  -8   7   0    6.80    1.10
  -8   7   0    4.70    0.90
   9  -7   0   25.10    1.90
   9  -7   0   21.80    1.90
   9  -7   0   27.40    1.70
   9  -7   0   21.70    1.80
  -9  -7   0   24.80    2.00
   9   7   0   27.50    1.80
   9   7   0   25.90    1.60
   9   7   0   22.60    1.80
   9   7   0   22.80    1.50
  -9   7   0   21.30    1.60
   9   7   0   24.80    1.80
  10  -7   0    2.90    1.00
  10  -7   0    3.60    1.10
 -10  -7   0    2.60    0.90
  10  -7   0    3.50    0.90
  10  -7   0    4.70    1.20
  10   7   0    2.10    0.90
  10   7   0    3.00    0.90
 -10   7   0    3.50    0.90
  10   7   0    2.50    0.90
  11  -7   0    3.20    1.20
  11  -7   0    2.60    1.00
  11  -7   0    1.60    1.00
  11  -7   0    2.90    1.00
  11   7   0    3.10    1.00
  11   7   0    2.70    1.00
 -11   7   0    4.20    1.00
  11   7   0    3.00    1.00
  12  -7   0    2.40    1.20
  12  -7   0    1.70    1.10
  12  -7   0    4.80    1.30
  12  -7   0    3.10    1.10
  12   7   0    1.20    1.00
  12   7   0    2.40    1.00
  12   7   0    4.40    1.20
 -12   7   0    2.20    0.90
  13  -7   0    3.00    1.30
  13  -7   0    1.80    1.20
  13  -7   0    2.50    1.10
  13  -7   0    0.90    1.00
  13   7   0    0.60    1.00
  13   7   0    3.50    1.30
  13   7   0    1.50    1.10
   0  -8   0   65.09    2.30
   0  -8   0   63.99    2.40
   0  -8   0   67.49    2.10
   0   8   0   65.09    2.30
   0   8   0   65.99    2.30
   0   8   0   65.09    2.10
  -1  -8   0  248.48    7.30
   1  -8   0  260.07    7.30
   1  -8   0  251.47    7.30
  -1  -8   0  266.87    7.10
   1  -8   0  246.08    7.00
   1   8   0  264.57    7.10
   1   8   0  247.08    7.30
   1   8   0  275.17    7.20
  -1   8   0  258.87    7.10
   1   8   0  250.07    6.90
  -1   8   0  255.67    7.40
  -1   8   0  264.27    7.30
   2  -8   0    1.80    0.50
  -2  -8   0    2.20    0.40
  -2  -8   0    2.10    0.50
   2  -8   0    2.20    0.40
   2  -8   0    1.40    0.60
   2   8   0    2.20    0.50
  -2   8   0    2.20    0.50
  -2   8   0    1.00    0.40
   2   8   0    2.30    0.40
   2   8   0    1.50    0.30
   2   8   0    2.40    0.40
   2   8   0    2.50    0.30
  -2   8   0    2.20    0.40
  -3  -8   0   91.69    3.20
   3  -8   0   92.29    2.60
   3  -8   0   91.89    2.90
  -3  -8   0   91.39    2.70
   3  -8   0   91.49    3.20
   3  -8   0   95.69    3.30
   3   8   0   93.09    2.70
  -3   8   0   88.79    3.10
   3   8   0   88.99    3.00
  -3   8   0   92.89    3.00
   3   8   0   95.09    2.80
   3   8   0   93.49    2.80
   3   8   0   90.79    2.70
   4  -8   0   19.80    1.10
   4  -8   0   19.30    1.30
   4  -8   0   19.60    0.90
   4  -8   0   18.20    1.40
  -4  -8   0   19.20    1.20
   4   8   0   20.10    0.80
   4   8   0   21.30    1.20
   4   8   0   20.60    0.80
  -4   8   0   20.10    1.30
   4   8   0   20.70    1.00
   4   8   0   22.50    1.10
  -4   8   0   21.10    1.30
  -4   8   0   19.10    1.20
   5  -8   0    7.10    0.80
   5  -8   0    7.70    0.70
  -5  -8   0    8.30    1.10
   5  -8   0    7.30    1.00
   5  -8   0    6.80    1.00
   5   8   0    8.20    0.80
   5   8   0    6.50    0.90
   5   8   0    7.70    0.70
  -5   8   0    5.60    0.90
  -5   8   0    7.40    0.90
  -5   8   0    6.30    0.90
   5   8   0    6.70    0.70
   6  -8   0   33.00    1.50
   6  -8   0   35.00    1.70
   6  -8   0   31.80    2.00
  -6  -8   0   31.60    1.80
   6  -8   0   32.00    1.90
  -6   8   0   34.80    1.80
  -6   8   0   36.20    1.80
   6   8   0   35.20    1.60
   6   8   0   35.40    1.80
   6   8   0   33.10    1.60
   6   8   0   33.00    1.60
   6   8   0   33.50    1.80
  -6   8   0   32.50    2.10
   7  -8   0   19.40    1.80
  -7  -8   0   24.20    1.70
   7  -8   0   24.90    1.80
   7  -8   0   27.60    1.40
   7  -8   0   23.90    1.60
   7   8   0   26.70    1.60
   7   8   0   26.70    1.70
   7   8   0   26.90    1.50
  -7   8   0   25.60    1.70
   7   8   0   26.30    1.70
  -7   8   0   25.00    1.60
   7   8   0   24.40    1.50
   7   8   0   26.30    1.50
   8  -8   0   80.79    3.50
  -8  -8   0   82.49    3.50
   8  -8   0   81.99    3.30
   8  -8   0   80.69    3.50
   8  -8   0   85.39    3.10
   8   8   0   86.69    3.40
   8   8   0   83.69    3.30
   8   8   0   89.99    3.20
  -8   8   0   90.99    3.50
   8   8   0   82.99    3.30
  -8   8   0   88.99    3.40
   8   8   0   84.79    3.40
   8   8   0   80.39    3.10
   9  -8   0   20.50    1.70
   9  -8   0   24.60    2.00
   9  -8   0   26.60    2.20
  -9  -8   0   20.50    1.80
   9  -8   0   26.50    1.60
  -9   8   0   21.90    1.70
   9   8   0   24.20    1.80
   9   8   0   24.50    1.50
   9   8   0   23.80    1.70
   9   8   0   25.70    1.90
   9   8   0   23.30    1.60
  -9   8   0   25.50    1.80
   9   8   0   24.80    1.60
  10  -8   0   -0.50    0.90
  10  -8   0    0.80    0.80
  10  -8   0    0.50    0.70
 -10  -8   0   -0.10    0.80
  10  -8   0   -0.30    0.80
  10   8   0    1.40    0.80
 -10   8   0    1.00    0.80
  10   8   0   -0.10    0.60
  10   8   0   -0.70    0.70
  10   8   0   -0.40    0.60
  11  -8   0   11.10    1.70
  11  -8   0    8.10    1.40
  11  -8   0   11.40    1.40
  11  -8   0    8.60    1.50
  11   8   0    8.20    1.40
 -11   8   0   10.20    1.40
  11   8   0   11.20    1.60
  11   8   0   11.10    1.60
  12  -8   0    0.70    1.10
  12  -8   0    1.70    0.90
  12  -8   0    0.40    1.10
  12  -8   0    0.80    1.10
  12   8   0    0.60    0.90
  12   8   0    1.00    0.80
  12   8   0    0.90    1.00
 -12   8   0    1.30    0.90
   0  -9   0    0.20    0.40
   0  -9   0    0.00    0.40
   0  -9   0   -0.20    0.20
   0  -9   0   -0.30    0.40
   0   9   0   -0.10    0.30
   0   9   0   -0.10    0.40
   0   9   0   -0.20    0.20
   0   9   0   -0.60    0.30
   1  -9   0   47.40    2.00
   1  -9   0   46.70    1.70
   1  -9   0   48.10    2.00
  -1  -9   0   48.60    1.90
  -1  -9   0   49.90    2.10
  -1   9   0   52.19    2.10
   1   9   0   52.29    1.90
   1   9   0   52.99    2.10
  -1   9   0   50.09    2.00
  -1   9   0   51.89    1.80
   1   9   0   51.39    1.80
   2  -9   0   44.20    2.00
   2  -9   0   42.30    1.90
  -2  -9   0   43.00    1.60
   2  -9   0   42.40    1.60
  -2  -9   0   43.70    2.00
   2   9   0   43.60    1.80
   2   9   0   42.60    1.60
  -2   9   0   43.00    1.90
  -2   9   0   44.90    1.70
   2   9   0   42.20    1.60
   2   9   0   46.10    1.40
   2   9   0   46.00    1.60
   3  -9   0   33.60    1.40
   3  -9   0   32.80    1.80
   3  -9   0   32.40    1.10
   3  -9   0   33.60    1.70
  -3  -9   0   30.90    1.60
  -3   9   0   30.50    1.60
   3   9   0   34.60    1.30
  -3   9   0   32.20    1.70
   3   9   0   34.00    1.30
  -3   9   0   32.20    1.50
   3   9   0   32.50    1.30
   3   9   0   34.80    1.60
   3   9   0   32.10    1.30
   4  -9   0   70.79    2.20
   4  -9   0   74.69    2.60
   4  -9   0   68.39    2.80
  -4  -9   0   67.29    2.80
   4  -9   0   71.89    2.90
   4   9   0   72.49    2.40
   4   9   0   72.49    2.20
   4   9   0   73.59    2.60
  -4   9   0   73.09    2.60
  -4   9   0   69.69    2.80
   4   9   0   70.79    2.20
   4   9   0   70.49    2.40
  -5  -9   0   10.50    1.20
   5  -9   0   10.50    1.00
   5  -9   0    9.50    1.20
   5  -9   0   10.20    1.30
   5  -9   0    9.40    0.80
   5   9   0   11.00    0.90
   5   9   0   11.80    0.60
  -5   9   0   12.30    1.20
   5   9   0   10.20    0.90
   5   9   0   10.40    0.60
  -5   9   0   11.70    1.20
   5   9   0   10.70    1.00
  -5   9   0   10.40    1.10
   6  -9   0  106.19    3.70
   6  -9   0  108.19    3.40
   6  -9   0  107.39    4.00
  -6  -9   0  103.69    4.00
   6  -9   0  101.19    4.10
   6   9   0  111.19    3.60
  -6   9   0  108.49    3.90
  -6   9   0  112.89    3.90
   6   9   0  106.09    3.50
   6   9   0  108.19    3.90
   6   9   0  103.89    3.60
   7  -9   0    3.20    0.90
   7  -9   0    6.20    1.20
   7  -9   0    4.30    0.90
  -7  -9   0    3.20    0.90
   7  -9   0    2.70    0.60
   7   9   0    3.80    0.80
   7   9   0    3.20    0.70
  -7   9   0    2.80    0.80
   7   9   0    1.70    0.60
   7   9   0    3.60    0.80
   7   9   0    3.90    0.80
  -7   9   0    2.80    0.80
   7   9   0    2.50    0.70
   8  -9   0    0.30    0.80
   8  -9   0    1.30    0.60
  -8  -9   0    1.30    0.80
   8  -9   0   -0.70    0.80
   8  -9   0    0.50    0.70
  -8   9   0    2.20    0.80
   8   9   0    0.70    0.60
   8   9   0    1.30    0.60
   8   9   0    1.50    0.70
   8   9   0    1.60    0.60
  -8   9   0    0.90    0.80
   8   9   0    1.00    0.60
   8   9   0    0.90    0.70
   9  -9   0   27.80    1.70
   9  -9   0   27.10    2.20
   9  -9   0   28.90    2.00
   9  -9   0   29.10    2.20
  -9  -9   0   26.30    2.10
   9   9   0   24.20    1.70
   9   9   0   28.80    1.90
   9   9   0   23.90    1.90
   9   9   0   26.80    1.60
  -9   9   0   26.30    1.90
   9   9   0   25.50    1.60
  -9   9   0   27.50    1.90
   9   9   0   25.40    1.80
  10  -9   0   -0.50    0.90
 -10  -9   0    2.60    1.10
  10  -9   0    0.10    1.00
  10  -9   0    0.50    0.90
  10   9   0    1.00    0.70
  10   9   0    0.60    0.80
  10   9   0   -0.70    0.70
 -10   9   0    2.40    0.90
  10   9   0    0.50    0.70
  10   9   0    0.10    0.60
  11  -9   0    0.80    1.00
  11  -9   0    1.10    1.00
  11  -9   0    1.30    1.20
 -11  -9   0    0.20    0.90
  11   9   0    2.20    1.00
  11   9   0    2.20    0.90
  11   9   0    2.60    1.00
  11   9   0    2.30    0.90
 -11   9   0    1.20    0.80
  12  -9   0    4.00    1.20
  12  -9   0    2.00    1.20
  12  -9   0    3.00    1.30
  12   9   0    3.20    1.20
 -12   9   0    3.00    1.10
  12   9   0    2.50    1.00
  12   9   0    4.80    1.20
  12   9   0    1.90    1.00
   0 -10   0   82.89    3.10
   0 -10   0   81.19    3.00
   0 -10   0   83.69    2.70
   0 -10   0   85.89    3.00
   0  10   0   85.69    3.10
   0  10   0   89.09    2.80
   0  10   0   86.79    3.00
   0  10   0   90.39    3.00
   1 -10   0    7.80    1.00
  -1 -10   0    8.20    0.80
  -1 -10   0    6.10    0.80
   1 -10   0    7.50    1.00
   1 -10   0    7.20    0.90
   1 -10   0    7.20    0.60
   1  10   0    7.20    0.80
   1  10   0    7.10    0.70
  -1  10   0    7.60    0.70
  -1  10   0    7.10    0.90
   1  10   0    7.20    0.60
  -1  10   0    6.80    0.80
   1  10   0    7.70    0.70
   2 -10   0   11.20    1.10
   2 -10   0   11.50    1.20
   2 -10   0   13.70    0.90
  -2 -10   0   13.90    1.10
  -2  10   0   12.60    0.90
   2  10   0   12.10    1.00
  -2  10   0   12.40    1.10
   2  10   0   11.30    0.80
   2  10   0   12.10    0.80
   2  10   0   12.50    0.80
   2  10   0   11.90    0.60
  -2  10   0   12.80    1.20
   3 -10   0   41.10    2.00
   3 -10   0   42.20    1.70
  -3 -10   0   44.80    2.10
   3 -10   0   42.20    2.20
   3  10   0   43.40    1.90
   3  10   0   41.90    1.60
  -3  10   0   41.00    1.80
   3  10   0   41.70    1.50
   3  10   0   38.90    1.60
  -3  10   0   41.80    2.00
  -3  10   0   39.00    1.90
   3  10   0   41.40    1.60
  -4 -10   0   29.70    1.70
   4 -10   0   26.20    1.40
   4 -10   0   28.40    1.70
   4 -10   0   27.60    1.90
  -4  10   0   29.20    1.60
  -4  10   0   29.00    1.70
   4  10   0   26.30    1.20
   4  10   0   25.40    1.10
   4  10   0   25.10    1.10
  -4  10   0   26.80    1.50
   4  10   0   27.30    1.30
   4  10   0   26.40    1.50
   5 -10   0   17.70    1.70
  -5 -10   0   16.50    1.40
   5 -10   0   13.30    1.20
   5 -10   0   12.40    1.30
  -5  10   0   16.30    1.30
   5  10   0   13.50    1.10
   5  10   0   13.80    1.00
   5  10   0   13.50    1.00
  -5  10   0   14.30    1.30
   5  10   0   14.50    0.70
   5  10   0   15.70    0.70
  -5  10   0   13.20    1.30
   6 -10   0   22.60    1.70
   6 -10   0   17.10    1.30
  -6 -10   0   20.60    1.50
   6 -10   0   18.70    1.80
   6  10   0   19.70    1.30
  -6  10   0   17.70    1.40
   6  10   0   16.20    1.10
   6  10   0   21.60    1.50
  -6  10   0   18.20    1.50
   6  10   0   16.60    1.20
   7 -10   0    3.10    1.00
   7 -10   0    1.20    0.70
   7 -10   0    3.10    1.10
  -7 -10   0    1.40    0.70
   7  10   0    3.30    0.80
   7  10   0    2.70    0.70
  -7  10   0    3.80    0.90
  -7  10   0    1.90    0.80
   7  10   0    2.80    0.70
   7  10   0    3.00    0.80
   7  10   0    2.50    0.80
   7  10   0    2.50    0.70
   8 -10   0    6.10    1.10
  -8 -10   0    7.40    1.20
   8 -10   0    5.00    1.20
   8 -10   0    7.40    1.40
   8  10   0    5.80    1.00
   8  10   0    6.60    1.10
  -8  10   0    8.30    1.20
   8  10   0    7.80    1.00
   8  10   0    8.60    1.20
   8  10   0    6.90    1.00
  -8  10   0    5.90    1.10
   8  10   0    5.40    1.00
   9 -10   0    6.30    1.40
  -9 -10   0    6.40    1.30
   9 -10   0    5.10    1.20
   9 -10   0    4.20    1.10
   9  10   0    5.60    0.90
   9  10   0    5.60    1.10
  -9  10   0    6.60    1.20
   9  10   0    7.40    1.20
   9  10   0    5.10    0.90
   9  10   0    6.40    1.10
  -9  10   0    6.10    1.20
   9  10   0    5.70    1.10
  10 -10   0    7.70    1.40
  10 -10   0    7.60    1.30
 -10 -10   0    6.00    1.30
  10 -10   0    8.20    1.60
  10  10   0    8.00    1.20
 -10  10   0    7.90    1.30
  10  10   0    7.20    1.30
  10  10   0    6.10    1.20
  10  10   0   11.00    1.40
  10  10   0    9.40    1.20
  11 -10   0    0.70    1.10
  11 -10   0   -0.70    0.90
 -11 -10   0   -0.10    0.90
  11 -10   0    0.80    1.00
  11  10   0    1.60    0.90
 -11  10   0    1.10    0.80
  11  10   0    1.60    0.90
  11  10   0    1.20    1.00
  12 -10   0    4.70    1.40
  12 -10   0    3.40    1.30
  12 -10   0    4.50    1.50
  12  10   0    2.80    1.10
  12  10   0    5.50    1.30
 -12  10   0    4.40    1.20
   0 -11   0    0.90    0.30
   0 -11   0    0.30    0.50
   0 -11   0    0.60    0.60
   0 -11   0    1.10    0.60
   0  11   0    0.40    0.50
   0  11   0    0.10    0.40
   0  11   0    0.80    0.40
   1 -11   0    6.30    0.90
   1 -11   0    6.50    1.00
  -1 -11   0    5.50    0.90
   1 -11   0    7.80    0.70
   1 -11   0    7.70    1.00
   1  11   0    6.90    0.90
  -1  11   0    7.30    0.90
   1  11   0    7.60    0.70
  -1  11   0    8.40    1.00
   1  11   0    5.90    0.70
  -1  11   0    7.00    0.70
   2 -11   0    6.90    0.70
  -2 -11   0    9.00    1.10
   2 -11   0    6.30    1.00
   2 -11   0    4.40    0.80
   2  11   0    9.30    0.70
   2  11   0    6.40    0.70
  -2  11   0    8.60    1.00
   2  11   0    6.00    0.90
  -2  11   0    7.00    0.80
  -2  11   0    7.20    1.00
   2  11   0    7.60    0.80
   3 -11   0   37.90    2.00
  -3 -11   0   38.30    2.00
   3 -11   0   35.40    1.60
   3 -11   0   40.00    2.20
   3  11   0   36.80    1.80
  -3  11   0   41.30    2.00
  -3  11   0   35.50    1.90
   3  11   0   35.60    1.50
  -3  11   0   35.50    1.70
   3  11   0   34.40    1.50
   3  11   0   33.30    1.50
   4 -11   0   38.80    2.20
   4 -11   0   36.60    1.70
   4 -11   0   37.70    2.00
  -4 -11   0   36.30    2.00
   4  11   0   33.00    2.00
   4  11   0   37.60    1.50
   4  11   0   39.10    1.60
  -4  11   0   36.20    2.00
  -4  11   0   38.80    1.80
   4  11   0   37.10    1.90
  -4  11   0   35.80    2.00
   4  11   0   36.30    1.50
   5 -11   0    8.20    1.20
   5 -11   0    8.30    1.30
  -5 -11   0    7.00    1.10
   5 -11   0    8.60    1.00
   5  11   0    7.30    0.90
  -5  11   0    8.10    1.10
  -5  11   0    4.90    0.90
   5  11   0    6.90    0.80
  -5  11   0    7.30    1.00
   5  11   0    6.90    0.60
   5  11   0    6.40    0.60
   5  11   0    9.00    0.80
   6 -11   0    4.10    0.80
  -6 -11   0    3.60    0.90
   6 -11   0    2.80    1.00
   6 -11   0    6.10    1.20
   6  11   0    5.20    0.80
   6  11   0    5.20    0.40
  -6  11   0    3.90    0.90
   6  11   0    4.80    0.90
   6  11   0    4.20    0.70
  -6  11   0    5.10    0.90
   6  11   0    3.40    0.70
   7 -11   0    7.30    1.10
   7 -11   0    5.80    1.20
  -7 -11   0    7.40    1.20
   7 -11   0    5.20    1.10
   7  11   0    7.80    1.00
   7  11   0    6.60    0.90
   7  11   0    7.10    1.10
   7  11   0    6.60    0.90
   7  11   0    6.10    1.00
   7  11   0    6.60    1.00
  -7  11   0    7.90    1.20
  -7  11   0    6.60    1.10
   8 -11   0    9.90    1.60
   8 -11   0    7.10    1.30
   8 -11   0    7.50    1.20
  -8 -11   0   10.90    1.50
   8  11   0    8.70    1.10
   8  11   0    9.30    1.30
  -8  11   0    9.00    1.30
   8  11   0    8.10    1.20
   8  11   0    6.80    1.00
  -8  11   0    9.90    1.40
   8  11   0    8.70    1.00
   8  11   0    9.50    1.30
   9 -11   0    1.80    0.90
  -9 -11   0    3.10    1.10
   9 -11   0    1.40    1.00
   9 -11   0    2.80    1.20
  -9  11   0    3.20    1.00
   9  11   0    1.90    0.90
   9  11   0    3.10    1.10
   9  11   0    3.50    0.90
  -9  11   0    1.90    0.90
   9  11   0    3.60    0.90
   9  11   0    2.50    0.90
  10 -11   0    4.70    1.10
  10 -11   0    2.80    1.30
 -10 -11   0    4.70    1.20
  10 -11   0    3.40    1.20
  10  11   0    4.60    1.00
  10  11   0    3.50    1.00
  10  11   0    4.30    1.00
 -10  11   0    3.50    1.00
  10  11   0    3.30    1.00
 -11 -11   0    0.80    1.00
  11 -11   0   -0.30    1.00
  11 -11   0   -0.80    0.90
  11 -11   0    0.10    1.10
  11  11   0   -0.50    0.80
  11  11   0   -0.70    0.60
 -11  11   0   -0.50    0.70
  11  11   0    0.00    0.80
   0 -12   0   17.90    1.40
   0 -12   0   15.80    1.00
   0  12   0   14.80    1.00
   0  12   0   15.90    1.30
   0  12   0   14.20    1.20
   1 -12   0   66.79    2.30
   1 -12   0   65.79    2.80
  -1 -12   0   66.99    2.80
   1 -12   0   66.59    2.80
  -1  12   0   67.59    2.70
   1  12   0   65.79    2.30
  -1  12   0   63.39    2.60
   1  12   0   63.89    2.60
  -1  12   0   65.19    2.40
   1  12   0   62.99    2.50
   2 -12   0   59.19    2.60
  -2 -12   0   60.39    2.70
   2 -12   0   58.09    2.70
   2 -12   0   55.69    2.70
   2 -12   0   61.99    2.20
  -2  12   0   62.19    2.60
  -2  12   0   58.09    2.30
   2  12   0   56.99    2.10
  -2  12   0   57.29    2.60
   2  12   0   59.89    2.50
   2  12   0   58.19    2.20
   3 -12   0   40.00    2.30
   3 -12   0   43.10    1.80
   3 -12   0   44.90    2.30
  -3 -12   0   46.60    2.30
   3  12   0   44.80    2.10
  -3  12   0   43.00    2.20
  -3  12   0   45.70    2.00
   3  12   0   46.40    1.80
  -3  12   0   42.30    2.20
   3  12   0   42.80    1.80
   4 -12   0   21.30    1.80
   4 -12   0   24.70    1.70
  -4 -12   0   26.50    1.70
   4 -12   0   23.90    1.40
   4  12   0   28.30    1.60
   4  12   0   27.50    1.30
  -4  12   0   24.70    1.70
  -4  12   0   23.70    1.50
  -4  12   0   26.30    1.70
   4  12   0   24.10    1.20
   5 -12   0   18.10    1.60
   5 -12   0   21.70    1.90
  -5 -12   0   19.70    1.60
   5 -12   0   21.60    1.40
   5  12   0   20.40    1.00
   5  12   0   23.40    1.50
  -5  12   0   20.00    1.60
   5  12   0   20.60    1.20
  -5  12   0   21.80    1.50
   5  12   0   21.60    1.00
  -5  12   0   19.20    1.60
   6 -12   0    0.20    0.90
   6 -12   0    0.20    0.80
   6 -12   0    1.20    0.70
  -6 -12   0    0.30    0.70
   6  12   0    1.00    0.60
   6  12   0    0.80    0.30
   6  12   0    0.90    0.60
   6  12   0    0.70    0.30
  -6  12   0    1.50    0.70
  -6  12   0    1.70    0.80
   6  12   0    0.20    0.70
   7 -12   0    4.60    0.90
   7 -12   0    4.70    1.20
  -7 -12   0    4.60    1.10
   7 -12   0    4.30    1.30
   7  12   0    4.10    0.90
   7  12   0    4.30    0.90
  -7  12   0    5.70    1.10
   7  12   0    5.20    1.00
  -7  12   0    3.90    1.00
   8 -12   0   12.20    1.60
   8 -12   0   14.80    1.50
  -8 -12   0   14.80    1.80
   8 -12   0   13.70    1.80
   8  12   0   14.20    1.40
  -8  12   0   15.00    1.60
   8  12   0   12.60    1.50
   8  12   0   14.90    1.50
  -8  12   0   16.60    1.80
   8  12   0   14.50    1.70
   9 -12   0    2.30    1.10
  -9 -12   0    0.50    0.80
   9 -12   0    1.10    1.10
   9 -12   0    1.00    0.90
  -9  12   0    1.20    1.00
   9  12   0    2.30    0.90
   9  12   0    2.00    0.90
  -9  12   0    2.30    1.00
   9  12   0    2.00    0.80
  10 -12   0   10.00    1.70
 -10 -12   0    9.90    1.70
  10 -12   0    8.70    1.40
  10 -12   0   11.10    1.90
  10  12   0   12.50    1.70
  10  12   0   10.30    1.50
 -10  12   0    6.30    1.40
  10  12   0   11.10    1.50
 -10  12   0    9.10    1.50
  11 -12   0    4.90    1.30
  11 -12   0   10.10    1.90
  11 -12   0    4.20    1.40
 -11  12   0    8.70    1.50
  11  12   0    6.70    1.80
   0 -13   0    0.30    0.60
   0 -13   0    0.40    0.50
   0  13   0    0.30    0.40
   0  13   0    0.50    0.50
   0  13   0    0.50    0.60
   1 -13   0   27.60    1.80
  -1 -13   0   25.00    1.70
   1 -13   0   24.10    1.70
   1 -13   0   26.40    1.30
  -1  13   0   24.30    1.70
  -1  13   0   26.60    1.60
   1  13   0   28.10    1.70
   1  13   0   26.00    1.30
  -1  13   0   25.70    1.40
   1  13   0   23.80    1.50
   2 -13   0    8.00    1.20
  -2 -13   0    8.30    1.10
   2 -13   0   11.30    0.90
   2 -13   0   10.90    1.30
   2 -13   0    9.00    1.20
  -2  13   0   12.80    1.30
   2  13   0   10.40    1.20
  -2  13   0    9.30    1.20
   2  13   0   10.40    0.90
  -2  13   0    9.50    1.00
   2  13   0    7.90    0.90
   3 -13   0    3.90    1.00
   3 -13   0    1.30    0.50
   3 -13   0    1.70    0.90
  -3 -13   0    2.60    0.80
   3  13   0    1.80    0.70
  -3  13   0    0.90    0.70
   3  13   0    3.30    0.60
  -3  13   0    0.90    0.60
   3  13   0    3.00    0.60
  -3  13   0    1.60    0.70
   4 -13   0    2.10    0.90
   4 -13   0    2.00    0.60
   4 -13   0    2.00    0.90
  -4 -13   0    3.50    0.90
   4  13   0    2.10    0.70
  -4  13   0    2.40    0.80
  -4  13   0    2.10    0.70
   4  13   0    1.70    0.50
  -4  13   0    2.00    0.80
  -5 -13   0   31.90    2.10
   5 -13   0   32.70    2.30
   5 -13   0   35.40    1.80
   5 -13   0   32.60    2.10
  -5  13   0   30.40    1.90
   5  13   0   34.80    1.90
  -5  13   0   36.20    2.20
  -5  13   0   37.30    2.20
   5  13   0   35.50    1.50
  -6 -13   0    8.90    1.40
   6 -13   0    8.90    1.10
   6 -13   0    8.70    1.40
   6 -13   0   10.20    1.60
  -6  13   0    8.40    1.20
   6  13   0    8.80    1.40
   6  13   0    8.40    0.60
  -6  13   0    9.30    1.20
   6  13   0    7.60    1.10
  -7 -13   0    2.00    0.90
   7 -13   0    0.20    0.70
   7 -13   0    0.40    0.90
   7 -13   0   -0.40    1.00
   7  13   0    0.80    0.80
  -7  13   0    2.00    0.90
  -7  13   0    2.20    0.90
   7  13   0    1.60    0.80
   8 -13   0    0.60    0.80
   8 -13   0    0.10    1.10
   8 -13   0   -0.50    0.90
  -8 -13   0    0.20    0.80
   8  13   0    0.90    0.80
  -8  13   0    2.30    1.00
   8  13   0    0.50    0.70
   8  13   0    3.10    1.00
  -8  13   0    1.70    0.90
  -9 -13   0   18.90    2.10
   9 -13   0   15.90    2.00
   9 -13   0   20.80    2.30
  -9  13   0   18.70    1.90
   9  13   0   21.90    2.10
   9  13   0   17.40    1.90
  -9  13   0   17.80    2.00
  10 -13   0    3.20    1.40
  10 -13   0    5.40    1.60
 -10 -13   0    3.60    1.30
  10  13   0    3.40    1.10
  10  13   0    2.80    1.00
 -10  13   0    4.20    1.20
 -10  13   0    4.70    1.20
   0 -14   0   42.60    2.40
   0  14   0   40.40    2.20
   0  14   0   47.30    2.20
   0  14   0   38.80    1.90
   1 -14   0   17.70    1.60
  -1 -14   0   16.10    1.50
   1 -14   0   15.50    1.50
   1  14   0   17.40    1.50
  -1  14   0   15.30    1.20
  -1  14   0   16.70    1.40
  -1  14   0   16.30    1.60
   1  14   0   16.10    1.30
  -2 -14   0    9.70    1.30
   2 -14   0    6.50    1.20
   2 -14   0    7.50    1.20
   2  14   0    6.50    1.00
  -2  14   0    6.60    1.10
   2  14   0    8.80    1.00
  -2  14   0    8.10    0.90
  -2  14   0    6.80    1.10
  -3 -14   0    8.20    1.30
   3 -14   0   12.00    1.70
   3 -14   0    9.90    1.40
   3 -14   0    9.50    1.30
   3  14   0    8.90    0.90
  -3  14   0    9.50    1.10
  -3  14   0    9.60    1.20
  -3  14   0    9.70    1.30
   3  14   0   10.50    1.20
   4 -14   0    2.50    0.90
  -4 -14   0    1.70    0.80
   4 -14   0    1.90    1.00
  -4  14   0    1.60    0.70
   4  14   0    2.30    0.80
  -4  14   0    2.00    0.80
   4  14   0    1.40    0.50
  -4  14   0    2.70    0.90
   5 -14   0    4.80    1.30
   5 -14   0    5.90    1.20
  -5 -14   0    2.90    1.00
   5  14   0    3.90    0.90
   5  14   0    4.50    0.60
  -5  14   0    2.80    0.90
  -5  14   0    4.30    1.00
   6 -14   0    2.10    1.00
  -6 -14   0    1.30    0.90
   6 -14   0    1.50    1.10
   6  14   0    2.10    0.80
   6  14   0    2.60    0.50
   6  14   0    2.90    1.00
  -6  14   0    2.30    0.90
  -6  14   0    2.70    0.90
  -7 -14   0   10.70    1.50
   7 -14   0   10.00    1.60
   7 -14   0   11.00    1.70
  -7  14   0   13.40    1.60
  -7  14   0   11.10    1.50
   7  14   0   10.90    1.30
   7  14   0   12.40    1.60
   8 -14   0   -0.30    1.00
  -8 -14   0    1.70    1.00
   8 -14   0    1.80    1.10
   8  14   0    2.50    1.10
   8  14   0    1.30    0.80
  -8  14   0    2.20    0.90
   8  14   0    1.40    0.90
  -8  14   0    2.80    1.10
   9 -14   0    0.80    1.10
   9 -14   0    1.60    1.30
  -9 -14   0    1.00    1.00
  -9  14   0    1.40    1.00
   9  14   0    0.40    0.70
  -9  14   0    2.50    1.10
   9  14   0    1.00    0.90
   0 -15   0    0.50    0.70
   0  15   0    1.10    0.80
   0  15   0    0.20    0.60
  -1 -15   0    6.80    1.10
   1 -15   0    7.30    1.20
  -1  15   0    5.60    1.00
   1  15   0    5.90    0.90
  -1  15   0    6.00    1.00
   1  15   0    5.60    1.00
  -2 -15   0    0.80    0.70
   2 -15   0    1.60    0.90
   2 -15   0    0.50    0.70
  -2  15   0    1.60    0.90
   2  15   0    1.50    0.60
   2  15   0    0.60    0.80
  -2  15   0   -0.10    0.60
  -3 -15   0   12.10    1.60
   3 -15   0   13.10    1.60
   3 -15   0   14.40    1.70
  -3  15   0   14.00    1.50
  -3  15   0   14.60    1.60
  -3  15   0   12.60    1.40
   3  15   0   14.70    1.20
   3  15   0   12.50    1.40
  -4 -15   0   -0.20    0.70
   4 -15   0    0.20    0.90
  -4  15   0    0.30    0.70
   4  15   0    0.20    0.70
   4  15   0   -0.30    0.40
  -4  15   0    0.50    0.70
  -4  15   0   -1.40    0.60
   5 -15   0    0.60    1.00
  -5 -15   0    3.40    1.10
   5 -15   0    0.40    0.90
   5  15   0    2.30    0.80
  -5  15   0    1.40    0.90
   5  15   0    2.60    0.50
  -5  15   0    2.00    0.80
   6 -15   0    6.00    1.30
  -6 -15   0    5.30    1.30
   6 -15   0    6.00    1.40
  -6  15   0    6.50    1.30
  -6  15   0    8.50    1.20
   6  15   0    4.40    0.60
   6  15   0    4.40    1.00
   6  15   0    5.00    1.20
   7 -15   0    1.20    1.10
   7 -15   0   -0.30    1.10
  -7 -15   0    0.50    0.80
  -7  15   0    0.80    0.80
   7  15   0    0.20    0.90
  -7  15   0    0.80    0.90
   7  15   0    1.70    0.90
   8 -15   0    3.90    1.30
  -8 -15   0    2.20    1.10
   8 -15   0    3.70    1.50
   8  15   0    1.50    1.00
  -8  15   0    2.40    1.20
  -8  15   0    1.60    1.00
   8  15   0    1.70    0.90
   0 -16   0    5.00    1.10
   0  16   0    6.20    1.20
   0  16   0    5.50    1.00
   1 -16   0    5.10    1.20
  -1 -16   0    4.70    1.10
   1  16   0    3.60    0.80
   1  16   0    6.40    1.20
  -1  16   0    6.80    1.10
  -1  16   0    5.30    1.20
   2 -16   0   10.10    1.50
  -2 -16   0   13.70    1.70
   2 -16   0   10.20    1.50
   2  16   0   11.50    1.40
   2  16   0    9.00    1.10
  -2  16   0   10.60    1.40
  -2  16   0   11.30    1.40
   3 -16   0   20.60    1.90
  -3 -16   0   19.20    1.70
   3 -16   0   17.80    1.90
  -3  16   0   18.50    1.80
   3  16   0   20.80    1.80
  -3  16   0   21.20    1.90
   3  16   0   20.40    1.40
   4 -16   0    9.40    1.50
   4 -16   0    8.10    1.50
  -4 -16   0    9.50    1.50
   4  16   0    8.20    1.00
   4  16   0    7.80    1.30
  -4  16   0   10.40    1.40
  -4  16   0    7.30    1.30
  -5 -16   0    1.80    1.00
   5 -16   0    2.30    1.20
  -5  16   0    3.00    1.10
   5  16   0    1.30    1.00
   5  16   0    2.20    0.60
  -6 -16   0    5.50    1.30
   6 -16   0    2.10    1.10
   6 -16   0    5.00    1.60
  -6  16   0    2.80    1.10
   6  16   0    3.90    1.20
   6  16   0    3.50    1.10
   6  16   0    4.30    0.60
  -7 -16   0   37.80    2.70
   7 -16   0   43.20    3.10
   7 -16   0   44.30    2.90
   7  16   0   39.60    2.80
   7  16   0   42.90    2.50
  -7  16   0   43.50    2.80
   7  16   0   37.70    1.40
   0 -17   0    1.70    0.90
   0  17   0    1.30    0.90
   0  17   0    0.80    0.80
  -1 -17   0   16.90    1.90
   1 -17   0   13.50    1.80
  -1  17   0   14.20    1.60
   1  17   0   11.00    1.30
   1  17   0   15.80    1.70
  -1  17   0   14.00    1.60
  -2 -17   0   15.20    1.80
   2 -17   0   14.30    1.80
  -2  17   0   12.60    1.60
   2  17   0   15.50    1.70
  -2  17   0   13.80    1.70
   2  17   0   11.10    1.30
   3 -17   0    0.00    1.00
   3 -17   0    0.50    1.00
  -3 -17   0   -0.30    0.80
  -3  17   0    0.30    0.80
   3  17   0    1.00    0.80
  -3  17   0    2.20    1.00
   3  17   0    0.10    0.50
   4 -17   0    2.30    1.10
   4 -17   0    4.00    1.30
  -4 -17   0    3.10    1.10
  -4  17   0    5.00    1.30
  -4  17   0    5.00    1.20
   4  17   0    4.20    1.10
   4  17   0    3.60    0.80
   5 -17   0   48.00    3.00
  -5 -17   0   47.20    2.90
  -5  17   0   43.30    2.80
   5  17   0   42.20    2.00
   5  17   0   44.90    2.60
   5  17   0   41.80    2.80
   6 -17   0    3.10    1.30
  -6 -17   0    0.90    1.00
   6  17   0    1.30    1.00
   6  17   0    3.50    1.20
  -6  17   0    1.70    1.10
   6  17   0    2.00    0.50
   0 -18   0    0.20    0.90
   0  18   0    1.20    0.80
   0  18   0    0.40    0.90
   1 -18   0   10.50    1.60
  -1 -18   0    9.00    1.60
  -1  18   0    7.00    1.20
  -1  18   0    5.60    1.30
   1  18   0    7.30    1.10
   1  18   0    7.40    1.40
  -2 -18   0    1.70    1.00
   2 -18   0    3.00    1.20
  -2  18   0    3.10    1.00
  -2  18   0    1.80    1.10
   2  18   0    1.60    0.70
   2  18   0    1.80    1.00
   3 -18   0   10.70    1.70
   3 -18   0   12.30    1.80
  -3 -18   0   12.70    1.80
   3  18   0    7.80    1.40
  -3  18   0    7.40    1.30
   3  18   0   11.00    1.20
  -3  18   0    8.50    1.50
   4 -18   0    4.60    1.40
  -4 -18   0    1.30    1.00
   4 -18   0    3.10    1.30
  -4  18   0    3.40    1.20
   4  18   0    3.40    1.10
   4  18   0    2.40    0.70
   5 -18   0    0.90    1.20
  -5 -18   0    1.10    1.10
   5 -18   0    2.80    1.30
   5  18   0    3.10    1.20
   5  18   0    1.60    0.60
  -5  18   0    1.30    1.20
   5  18   0    2.40    1.10
   0 -19   0    0.40    0.90
   0  19   0    1.00    1.00
   0  19   0   -1.80    0.60
   1 -19   0    5.40    1.40
  -1 -19   0    4.70    1.30
   1  19   0    6.10    1.10
  -1  19   0    2.90    1.20
  -1  19   0    4.50    1.10
   1  19   0    5.60    1.30
  -2 -19   0    1.80    1.10
   2 -19   0    2.80    1.20
  -2  19   0    2.80    1.10
  -2  19   0    2.60    1.20
   2  19   0    3.50    1.20
   2  19   0    2.10    0.80
  14   0  -1    3.50    1.20
  14   0  -1    2.70    1.10
  14   0  -1    3.70    1.30
  13   0  -1   -0.20    0.90
  13   0  -1   -0.10    0.90
  13   0  -1    0.20    0.80
  13   0  -1    0.00    0.70
  12   0  -1    0.70    0.90
  12   0  -1    1.80    0.70
  12   0  -1    0.20    0.80
  12   0  -1    0.90    0.90
  11   0  -1   16.30    1.60
  11   0  -1   18.60    1.90
  11   0  -1   17.80    1.70
  11   0  -1   15.70    1.40
  10   0  -1   27.50    2.00
  10   0  -1   29.80    2.00
  10   0  -1   28.40    1.60
  10   0  -1   32.70    2.00
   9   0  -1   89.39    3.50
   9   0  -1   84.39    3.40
   9   0  -1   92.29    3.20
   9   0  -1   88.59    3.40
   8   0  -1   19.40    1.40
   8   0  -1   17.80    1.10
   8   0  -1   18.30    1.10
   8   0  -1   19.60    0.90
   8   0  -1   16.10    1.30
   7   0  -1   27.80    1.30
   7   0  -1   26.40    1.20
   7   0  -1   26.40    1.00
   7   0  -1   25.10    1.50
   7   0  -1   27.80    1.50
   6   0  -1   10.20    1.00
   6   0  -1    8.20    0.80
   6   0  -1   12.30    1.00
  -6   0   1    9.80    0.80
   6   0  -1    9.60    0.60
   6   0  -1   10.80    0.80
   5   0  -1  135.09    4.00
   5   0  -1  134.09    4.10
   5   0  -1  126.49    3.60
  -5   0   1  129.09    4.00
   5   0  -1  133.89    3.90
   5   0  -1  138.29    3.80
   4   0  -1   25.30    0.80
   4   0  -1   25.40    1.20
   4   0  -1   24.90    1.00
   4   0  -1   23.90    1.10
   4   0  -1   25.00    1.00
  -4   0   1   25.20    1.10
   3   0  -1   45.70    1.60
   3   0  -1   46.10    1.50
  -3   0   1   49.40    1.50
   3   0  -1   45.20    1.60
   3   0  -1   47.70    1.30
   3   0  -1   47.20    1.50
  -3   0   1   45.50    1.60
   3   0  -1   42.60    1.50
   2   0  -1    8.60    0.50
  -2   0   1    8.70    0.50
   2   0  -1    9.10    0.50
   2   0  -1    8.70    0.30
   2   0  -1    8.40    0.50
   2   0  -1    8.60    0.40
  -2   0   1    8.40    0.50
   2   0  -1    8.60    0.50
   1   0  -1  112.09    3.10
   1   0  -1  115.79    3.00
   1   0  -1  113.79    3.00
   1   0  -1  110.19    3.10
  -1   0   1  119.19    3.10
  -1   0   1  114.59    3.00
   1   0  -1  122.99    3.10
  -1   0   1  114.59    3.00
   1   0  -1  117.29    3.10
   0   0  -1    1.00    0.10
   0   0  -1    0.00    0.10
   0   0  -1    1.00    0.10
   0   0   1    0.10    0.10
   0   0  -1    1.00    0.10
   0   0  -1    0.40    0.10
   0   0  -1    0.90    0.10
   0   0  -1    0.50    0.10
  -1   0  -1   10.20    0.40
   1   0   1   10.40    0.50
  -1   0  -1    9.90    0.50
   1   0   1    9.80    0.40
   1   0   1    9.60    0.50
  -1   0  -1    9.30    0.40
   1   0   1   10.00    0.50
  -1   0  -1   10.00    0.50
   2   0   1   11.60    0.60
   2   0   1   11.00    0.60
  -2   0  -1   12.10    0.50
   2   0   1   11.00    0.70
   2   0   1   11.50    0.50
  -2   0  -1   11.00    0.50
  -2   0  -1   10.60    0.70
  -2   0  -1   11.00    0.60
   3   0   1   20.00    0.90
  -3   0  -1   18.50    0.90
  -3   0  -1   19.50    0.80
  -3   0  -1   21.50    0.80
   3   0   1   20.70    1.00
   3   0   1   19.80    1.00
   3   0   1   19.90    0.90
  -3   0  -1   19.80    0.80
  -4   0  -1    7.70    0.50
   4   0   1    6.60    0.60
   4   0   1    7.10    0.70
  -4   0  -1    7.30    0.70
   4   0   1    6.90    0.70
   4   0   1    6.70    0.60
  -4   0  -1    7.40    0.50
   5   0   1   45.80    1.60
   5   0   1   42.90    1.80
   5   0   1   46.60    1.60
  -5   0  -1   45.00    1.60
   5   0   1   46.10    1.90
  -5   0  -1   45.50    1.60
   6   0   1    6.30    0.60
  -6   0  -1    5.40    0.60
  -6   0  -1    5.70    0.60
   6   0   1    5.90    0.60
   6   0   1    6.30    0.70
   6   0   1    5.20    0.70
   6   0   1    5.70    0.80
   7   0   1   18.70    1.10
   7   0   1   18.40    1.30
   7   0   1   19.00    1.10
   7   0   1   19.30    1.00
   7   0   1   17.80    1.30
   8   0   1   10.20    1.20
   8   0   1   13.70    1.10
   8   0   1    9.50    1.20
   8   0   1   10.90    1.00
   8   0   1   11.60    0.90
   9   0   1   25.10    1.30
   9   0   1   24.70    1.50
   9   0   1   28.90    1.90
   9   0   1   28.60    1.90
   9   0   1   28.20    1.50
  10   0   1    1.60    0.80
  10   0   1    1.60    0.80
  10   0   1    0.20    0.60
  10   0   1    0.40    0.50
  11   0   1    2.40    1.00
  11   0   1    2.50    0.80
  11   0   1    3.40    1.10
  12   0   1   -0.10    0.90
  12   0   1    2.30    0.80
  12   0   1    0.30    0.90
  13   0   1    7.00    1.40
  13   0   1    8.50    1.60
  13   0   1    6.30    1.10
  13   0   1    6.30    1.50
  14  -1  -1    4.60    1.40
  14  -1  -1    2.10    0.90
  14  -1  -1    1.30    1.00
  14  -1  -1    2.30    1.20
  14   1  -1    3.60    1.20
  14   1  -1    2.50    1.20
  14   1  -1    3.40    1.20
  13  -1  -1    2.60    1.10
  13  -1  -1   -0.10    0.90
  13  -1  -1    0.20    0.70
  13  -1  -1    1.50    1.00
  13   1  -1    2.00    1.00
  13   1  -1    0.90    1.00
  13   1  -1    0.20    0.90
  12  -1  -1   14.40    1.70
  12  -1  -1   16.40    1.50
  12  -1  -1   14.90    1.70
  12  -1  -1   15.20    1.80
  12   1  -1   15.10    1.70
  12   1  -1   12.60    1.70
  12   1  -1   15.10    1.30
  12   1  -1   16.50    1.70
  11  -1  -1   29.30    2.10
  11  -1  -1   31.00    2.00
  11  -1  -1   31.90    2.20
  11  -1  -1   27.20    1.80
  11   1  -1   30.50    2.00
  11   1  -1   26.20    2.00
  11   1  -1   27.40    1.90
  11   1  -1   26.80    1.60
  10  -1  -1   38.00    2.00
  10  -1  -1   37.10    2.10
  10  -1  -1   39.10    2.30
  10  -1  -1   37.90    2.10
  10   1  -1   34.30    2.10
  10   1  -1   40.40    2.30
  10   1  -1   34.30    1.70
  10   1  -1   34.40    2.10
   9  -1  -1   41.30    1.90
   9  -1  -1   36.10    2.00
   9  -1  -1   38.10    2.10
   9  -1  -1   41.60    2.10
   9   1  -1   41.70    2.10
  -9   1   1   41.60    2.00
   9   1  -1   38.30    2.10
   9   1  -1   41.20    2.20
   9   1  -1   41.50    1.80
   8  -1  -1   10.40    1.10
   8  -1  -1   10.00    1.20
   8  -1  -1   10.30    0.60
   8  -1  -1    8.10    1.00
   8  -1  -1   11.10    1.00
   8   1  -1    9.20    0.70
   8   1  -1   10.50    0.80
   8   1  -1   10.80    1.10
   8   1  -1   10.60    1.10
  -8   1   1    9.80    1.00
   8   1  -1   10.00    0.90
   8   1  -1   12.60    1.20
   7  -1  -1    8.20    1.00
   7  -1  -1    8.90    0.80
   7  -1  -1    9.30    0.90
   7  -1  -1    8.90    0.90
   7  -1  -1   10.50    0.60
   7   1  -1    8.80    0.60
   7   1  -1    8.50    1.00
   7   1  -1    8.30    0.70
   7   1  -1    9.10    0.80
   7   1  -1    8.30    0.90
   7   1  -1    9.10    0.70
  -7   1   1    7.90    0.80
   6  -1  -1   10.90    0.90
   6  -1  -1   11.80    0.60
   6  -1  -1   11.70    0.80
   6  -1  -1   12.00    1.00
   6  -1  -1   12.90    1.10
   6   1  -1   11.10    0.60
   6   1  -1   12.30    0.70
   6   1  -1   12.60    1.10
   6   1  -1   11.60    0.90
   6   1  -1    9.30    0.70
   6   1  -1   12.40    0.80
  -6   1   1   10.30    0.80
   5  -1  -1   81.19    2.90
   5  -1  -1   87.39    2.40
   5  -1  -1   87.69    2.90
   5  -1  -1   83.79    2.80
   5  -1  -1   89.59    2.70
  -5   1   1   85.69    2.90
   5   1  -1   91.79    2.60
   5   1  -1   91.69    2.90
   5   1  -1   87.19    2.70
   5   1  -1   90.39    2.60
   5   1  -1   92.49    2.70
   5   1  -1   90.49    3.00
   4  -1  -1  300.37    7.90
   4  -1  -1  302.77    8.20
   4  -1  -1  301.77    8.30
   4  -1  -1  300.07    8.20
   4   1  -1  307.57    8.10
   4   1  -1  295.97    8.10
   4   1  -1  306.07    8.10
  -4   1   1  299.97    8.30
   4   1  -1  303.57    8.10
   4   1  -1  311.27    8.30
  -4   1   1  304.57    8.20
   4   1  -1  311.47    8.40
   3  -1  -1   69.29    2.10
   3  -1  -1   69.09    2.20
   3  -1  -1   68.99    2.20
   3  -1  -1   69.99    2.10
   3  -1  -1   68.09    1.90
   3  -1  -1   70.19    2.20
  -3   1   1   71.39    1.90
   3   1  -1   69.29    2.20
   3   1  -1   73.09    2.00
   3   1  -1   74.69    2.00
   3   1  -1   68.99    2.20
  -3   1   1   70.39    2.20
   3   1  -1   70.39    2.20
  -3   1   1   70.49    2.20
   3   1  -1   73.49    2.10
  -2  -1   1 1114.59   29.10
   2  -1  -1 1111.19   28.70
   2  -1  -1 1097.29   28.70
   2  -1  -1 1119.49   29.10
   2  -1  -1 1111.39   28.60
   2  -1  -1 1092.39   28.70
   2   1  -1 1036.80   27.90
   2   1  -1 1088.29   28.10
  -2   1   1 1081.19   27.90
  -2   1   1 1074.79   27.90
   2   1  -1 1092.49   27.90
  -2   1   1 1068.09   27.90
   2   1  -1 1089.39   28.10
   2   1  -1 1089.19   28.30
   1  -1  -1   94.49    2.50
   1  -1  -1   92.29    2.60
  -1  -1   1   90.39    2.50
   1  -1  -1   92.69    2.60
  -1  -1   1   95.19    2.50
   1  -1  -1   95.09    2.60
   1  -1  -1   96.39    2.60
  -1  -1   1   91.79    2.50
  -1  -1   1  100.39    2.50
   1   1  -1   98.29    2.60
  -1   1   1   94.99    2.60
   1   1  -1   95.59    2.50
   1   1  -1   93.69    2.50
  -1   1   1   94.09    2.60
   1   1  -1   91.59    2.50
  -1   1   1   93.79    2.50
   1   1  -1   95.19    2.60
   1   1  -1   91.29    2.50
   0  -1  -1  434.56   11.80
   0  -1   1  436.96   11.60
   0  -1   1  452.55   11.50
   0  -1  -1  461.55   11.60
   0  -1  -1  451.15   11.50
   0  -1   1  440.16   11.80
   0  -1   1  446.16   11.60
   0  -1   1  423.56   11.70
   0  -1  -1  449.46   11.80
   0  -1  -1  425.86   11.60
   0   1  -1  441.96   12.00
   0   1   1  447.26   11.70
   0   1   1  449.46   11.70
   0   1   1  452.05   11.80
   0   1  -1  442.36   11.70
   0   1  -1  452.15   11.80
   0   1  -1  451.85   11.70
   0   1   1  440.86   11.90
   1  -1   1    4.50    0.40
  -1  -1  -1    4.10    0.30
   1  -1   1    3.80    0.30
   1  -1   1    4.30    0.30
  -1  -1  -1    4.20    0.30
   1  -1   1    4.20    0.30
  -1  -1  -1    3.30    0.30
   1  -1   1    4.40    0.30
   1   1   1    4.10    0.30
  -1   1  -1    4.40    0.30
  -1   1  -1    4.00    0.30
   1   1   1    3.90    0.30
   1   1   1    3.60    0.30
   1   1   1    3.80    0.30
  -1   1  -1    4.10    0.30
  -1   1  -1    4.40    0.30
   1   1   1    4.30    0.20
  -2  -1  -1   25.80    0.80
  -2  -1  -1   26.60    1.10
   2  -1   1   24.60    0.90
   2  -1   1   25.30    1.00
   2  -1   1   24.90    1.00
   2  -1   1   26.60    1.10
   2   1   1   24.70    1.10
  -2   1  -1   26.00    0.90
   2   1   1   26.70    0.90
   2   1   1   27.60    0.90
  -2   1  -1   24.60    1.00
   2   1   1   26.70    1.00
   3  -1   1  229.68    6.40
   3  -1   1  237.88    6.50
   3  -1   1  225.28    6.30
   3  -1   1  238.88    6.30
  -3  -1  -1  226.78    6.20
  -3  -1  -1  228.08    6.50
  -3   1  -1  234.28    6.30
   3   1   1  219.28    6.30
   3   1   1  216.78    6.20
   3   1   1  232.78    6.10
  -3   1  -1  228.18    6.20
   3   1   1  230.08    6.10
  -3   1  -1  228.58    6.20
  -3   1  -1  224.08    6.10
   4  -1   1   93.79    3.00
   4  -1   1   94.29    2.80
   4  -1   1   95.99    2.80
  -4  -1  -1   86.79    2.70
  -4  -1  -1   87.49    3.00
   4  -1   1   95.79    3.10
  -4   1  -1   88.59    2.90
   4   1   1   93.89    2.70
   4   1   1   90.39    2.80
   4   1   1   91.49    3.00
   4   1   1   92.39    2.90
  -4   1  -1   94.09    2.80
  -4   1  -1   91.59    2.80
   4   1   1   89.09    2.70
  -4   1  -1   90.69    2.70
  -5  -1  -1   23.30    1.00
   5  -1   1   23.10    1.30
   5  -1   1   20.10    1.30
   5  -1   1   22.70    1.10
   5  -1   1   22.20    1.00
  -5  -1  -1   27.20    1.40
   5  -1   1   21.90    1.20
   5   1   1   24.30    1.10
   5   1   1   21.30    1.00
   5   1   1   23.70    1.30
  -5   1  -1   23.00    1.20
   5   1   1   26.00    1.00
  -5   1  -1   19.60    1.00
   5   1   1   25.40    1.30
  -5   1  -1   23.10    1.10
   6  -1   1   33.70    1.50
   6  -1   1   31.50    1.30
   6  -1   1   31.10    1.70
   6  -1   1   30.80    1.60
  -6  -1  -1   35.40    1.30
   6  -1   1   34.70    1.50
   6   1   1   34.50    1.70
   6   1   1   34.00    1.30
   6   1   1   33.60    1.40
   6   1   1   33.00    1.70
  -6   1  -1   30.60    1.40
   6   1   1   36.30    1.40
  -6   1  -1   31.00    1.40
   7  -1   1   86.59    3.30
   7  -1   1   93.29    3.30
   7  -1   1   86.99    3.00
   7  -1   1   87.69    3.10
   7  -1   1   85.59    2.80
   7   1   1   90.49    2.90
   7   1   1   84.39    3.30
   7   1   1   94.19    3.00
   7   1   1   93.59    3.40
   7   1   1   91.29    2.90
  -7   1  -1   85.09    3.00
   8  -1   1   22.50    1.10
   8  -1   1   19.50    1.50
   8  -1   1   21.80    1.60
   8  -1   1   19.20    1.30
   8  -1   1   20.70    1.40
   8   1   1   19.70    1.20
   8   1   1   20.10    1.50
   8   1   1   19.50    1.10
   8   1   1   20.40    1.50
  -8   1  -1   21.30    1.20
   8   1   1   19.70    1.10
   9  -1   1    0.30    0.70
   9  -1   1    0.10    0.70
   9  -1   1    1.30    0.50
   9  -1   1   -0.30    0.40
   9  -1   1    0.30    0.60
   9   1   1    0.70    0.40
   9   1   1    1.10    0.70
   9   1   1    0.50    0.50
   9   1   1    0.80    0.70
  -9   1  -1    0.30    0.50
   9   1   1    0.10    0.40
  10  -1   1   22.40    1.80
  10  -1   1   23.40    1.50
  10  -1   1   26.30    1.90
  10  -1   1   23.10    1.60
  10   1   1   21.50    1.40
  10   1   1   22.10    1.80
  10   1   1   21.90    1.40
  10   1   1   23.10    1.80
  11  -1   1    1.40    0.90
  11  -1   1    1.20    0.80
  11  -1   1    3.60    0.90
  11   1   1    3.00    1.00
  11   1   1    2.80    0.70
  11   1   1    1.60    0.90
  12  -1   1    0.70    0.90
  12  -1   1    0.60    0.80
  12  -1   1    0.60    0.90
  12   1   1    0.90    0.70
  12   1   1   -0.40    0.80
  12   1   1    0.00    0.80
  13  -1   1    1.70    0.90
  13  -1   1    2.90    1.20
  13  -1   1    1.90    1.10
  13  -1   1    3.00    1.10
  13   1   1    2.10    1.10
  13   1   1    2.70    1.20
  13   1   1    3.30    1.10
  14  -2  -1    1.80    1.10
  14  -2  -1    1.20    1.10
  14  -2  -1    0.70    1.00
  14  -2  -1    2.60    1.00
  14   2  -1    0.90    1.10
  14   2  -1    1.10    1.00
  13  -2  -1   12.60    1.70
  13  -2  -1   13.20    1.70
  13  -2  -1   11.00    1.40
  13  -2  -1   11.30    1.70
  13   2  -1   12.10    1.60
  13   2  -1   11.80    1.70
  13   2  -1    9.40    1.50
  12  -2  -1    5.10    1.20
  12  -2  -1    4.60    1.10
  12  -2  -1    4.50    1.10
  12   2  -1    4.20    1.10
  12   2  -1    8.00    1.30
  12   2  -1    7.80    1.40
  11  -2  -1    2.20    1.00
  11  -2  -1    3.90    1.00
  11  -2  -1    2.60    0.90
  11  -2  -1    2.60    0.90
  11   2  -1    1.30    0.80
  11   2  -1    3.60    0.70
  11   2  -1    1.50    0.80
  11   2  -1    1.80    0.90
  10  -2  -1    6.30    1.10
  10  -2  -1    5.90    1.00
  10  -2  -1    6.00    1.00
  10  -2  -1    5.40    1.00
  10   2  -1    6.40    1.10
  10   2  -1    7.30    1.10
  10   2  -1    5.30    0.70
  10   2  -1    4.40    1.00
 -10   2   1    5.00    0.90
   9  -2  -1   42.90    2.20
   9  -2  -1   44.70    2.20
   9  -2  -1   43.90    2.30
   9  -2  -1   49.90    2.30
   9   2  -1   46.10    2.30
   9   2  -1   45.60    2.30
   9   2  -1   44.20    2.20
   9   2  -1   45.10    1.80
  -9   2   1   48.00    2.20
   8  -2  -1    4.60    0.80
   8  -2  -1    4.80    0.90
   8  -2  -1    5.30    0.50
   8  -2  -1    4.00    0.80
   8  -2  -1    4.60    0.80
   8   2  -1    4.50    0.50
   8   2  -1    3.70    0.50
   8   2  -1    4.40    0.70
  -8   2   1    4.50    0.80
   8   2  -1    4.10    0.90
   8   2  -1    4.70    0.60
   8   2  -1    3.40    0.70
   7  -2  -1   85.09    2.50
   7  -2  -1   89.79    3.10
   7  -2  -1   83.29    3.10
   7  -2  -1   88.69    3.10
   7  -2  -1   86.59    2.90
   7   2  -1   91.99    2.80
  -7   2   1   88.19    3.10
   7   2  -1   90.89    3.30
   7   2  -1   87.09    2.80
   7   2  -1   93.49    3.20
   7   2  -1   90.19    2.70
   7   2  -1   90.69    2.80
   6  -2  -1   17.40    1.10
   6  -2  -1   18.80    0.70
   6  -2  -1   18.30    1.20
   6  -2  -1   17.60    1.00
   6  -2  -1   17.30    1.20
   6   2  -1   20.30    0.80
  -6   2   1   18.70    1.00
   6   2  -1   17.40    0.90
   6   2  -1   18.70    0.90
   6   2  -1   19.00    0.90
   6   2  -1   19.80    1.20
   6   2  -1   19.10    1.10
  -6   2   1   19.20    1.10
   5  -2  -1  235.08    6.70
  -5  -2   1  228.78    6.90
   5  -2  -1  234.18    6.80
   5  -2  -1  240.28    6.80
   5  -2  -1  243.58    6.60
   5  -2  -1  240.28    6.30
   5   2  -1  241.88    6.40
   5   2  -1  225.28    6.80
   5   2  -1  255.57    6.80
   5   2  -1  228.68    6.40
   5   2  -1  238.68    6.50
   5   2  -1  239.98    6.40
  -5   2   1  239.98    6.70
  -5   2   1  243.88    6.80
   4  -2  -1  106.99    3.20
   4  -2  -1  110.49    2.90
   4  -2  -1  104.59    3.20
   4  -2  -1  100.69    3.20
   4  -2  -1  103.59    3.30
  -4  -2   1  101.89    3.30
  -4   2   1  104.99    3.20
   4   2  -1  102.89    2.90
   4   2  -1  105.79    2.90
   4   2  -1  102.29    3.20
   4   2  -1  103.99    3.00
   4   2  -1  104.69    3.20
  -4   2   1  109.79    3.20
   4   2  -1  103.89    2.90
   3  -2  -1  549.74   14.80
  -3  -2   1  555.14   14.90
   3  -2  -1  578.64   14.60
   3  -2  -1  577.04   14.90
   3  -2  -1  558.44   14.90
   3  -2  -1  562.64   14.90
   3   2  -1  539.35   15.00
   3   2  -1  570.94   14.70
   3   2  -1  581.24   14.70
  -3   2   1  571.04   15.00
  -3   2   1  576.54   15.00
   3   2  -1  579.24   15.00
  -3   2   1  565.84   15.00
   3   2  -1  571.54   15.00
   2  -2  -1  170.78    4.80
   2  -2  -1  171.78    4.70
   2  -2  -1  180.08    4.70
  -2  -2   1  166.58    4.70
   2  -2  -1  174.28    4.60
   2  -2  -1  169.88    4.70
   2   2  -1  177.88    4.70
  -2   2   1  169.38    4.80
   2   2  -1  169.08    4.50
   2   2  -1  166.88    4.70
   2   2  -1  180.88    4.60
  -2   2   1  181.28    4.80
  -2   2   1  172.88    4.70
   1  -2  -1 1525.55   40.50
  -1  -2   1 1483.05   40.20
  -1  -2   1 1624.24   40.70
   1  -2  -1 1499.75   40.40
   1  -2  -1 1563.24   40.80
   1  -2  -1 1619.64   40.80
  -1   2   1 1448.26   39.30
   1   2  -1 1532.85   39.10
   1   2  -1 1496.65   38.80
  -1   2   1 1462.45   38.80
   1   2  -1 1436.06   39.20
  -1   2   1 1495.75   38.80
   1   2  -1 1562.74   38.80
  -1   2   1 1507.75   39.20
   0  -2   1  170.28    4.50
   0  -2   1  167.58    4.50
   0  -2   1  162.88    4.40
   0  -2  -1  167.18    4.40
   0  -2   1  168.08    4.50
   0  -2   1  166.58    4.30
   0  -2  -1  167.78    4.50
   0  -2  -1  170.68    4.40
   0  -2  -1  163.08    4.60
   0  -2  -1  171.28    4.50
   0   2  -1  164.28    4.50
   0   2  -1  170.48    4.50
   0   2   1  163.88    4.30
   0   2  -1  170.98    4.50
   0   2  -1  155.58    4.30
   0   2  -1  161.78    4.50
   0   2   1  171.38    4.50
   0   2   1  175.28    4.40
   0   2  -1  166.08    4.40
   0   2   1  169.48    4.40
  -1  -2  -1 1583.04   40.90
   1  -2   1 1566.44   40.90
   1  -2   1 1580.54   40.90
   1  -2   1 1546.05   40.80
   1  -2   1 1556.14   41.10
  -1   2  -1 1554.64   41.30
  -1   2  -1 1594.74   41.80
  -1   2  -1 1591.64   41.70
   1   2   1 1711.23   41.40
  -1   2  -1 1575.14   41.30
   1   2   1 1554.24   41.50
   1   2   1 1517.55   41.20
   1   2   1 1582.04   41.20
  -1   2  -1 1553.14   41.40
   2  -2   1  323.77    8.80
  -2  -2  -1  311.87    8.60
   2  -2   1  324.97    8.90
   2  -2   1  336.37    8.90
  -2  -2  -1  354.76    9.00
   2  -2   1  339.07    8.80
   2   2   1  328.47    8.50
  -2   2  -1  335.27    8.70
  -2   2  -1  322.67    8.60
   2   2   1  319.67    8.50
  -2   2  -1  325.17    8.70
   2   2   1  325.47    8.70
   3  -2   1  102.09    3.00
  -3  -2  -1  100.89    2.70
   3  -2   1  100.89    3.10
  -3  -2  -1   96.09    3.10
   3  -2   1   97.99    2.90
   3  -2   1   97.89    3.00
  -3   2  -1   98.49    2.90
   3   2   1   99.99    2.80
   3   2   1  101.59    3.10
  -3   2  -1   98.29    3.00
   3   2   1   99.39    3.00
  -3   2  -1   99.09    3.00
   3   2   1  105.09    2.80
  -3   2  -1   99.19    3.00
   4  -2   1   56.89    2.10
   4  -2   1   55.59    1.90
   4  -2   1   54.79    1.80
   4  -2   1   53.79    2.00
  -4  -2  -1   57.89    2.10
  -4  -2  -1   53.79    1.70
  -4   2  -1   56.29    1.90
   4   2   1   55.99    1.70
  -4   2  -1   54.79    1.90
   4   2   1   57.39    1.90
   4   2   1   57.49    1.70
   4   2   1   55.59    2.10
  -4   2  -1   55.79    1.90
  -4   2  -1   54.19    2.00
   5  -2   1   92.79    3.10
  -5  -2  -1   97.59    2.80
   5  -2   1   95.79    2.90
   5  -2   1   94.19    3.20
  -5  -2  -1   93.59    3.30
   5  -2   1   96.49    3.10
   5  -2   1   93.29    3.20
  -5   2  -1  101.49    3.30
   5   2   1  100.59    2.90
   5   2   1  101.09    3.30
  -5   2  -1   98.29    3.10
   5   2   1   99.39    3.10
  -5   2  -1   96.49    3.10
   5   2   1   97.39    3.30
  -5   2  -1   96.19    3.10
   5   2   1  102.69    2.90
  -6  -2  -1   16.90    0.80
   6  -2   1   19.30    1.10
   6  -2   1   19.80    1.30
  -6  -2  -1   17.90    1.30
   6  -2   1   21.90    1.40
   6  -2   1   21.30    1.30
   6  -2   1   21.10    1.00
   6   2   1   18.20    0.90
   6   2   1   17.70    0.80
  -6   2  -1   21.10    1.30
   6   2   1   19.40    0.90
   6   2   1   17.80    1.20
   6   2   1   17.30    1.00
  -6   2  -1   19.50    1.10
   6   2   1   18.80    1.30
   7  -2   1   12.80    1.00
   7  -2   1   12.00    0.80
   7  -2   1   11.50    1.10
   7  -2   1   13.70    1.20
   7  -2   1   13.60    1.20
   7   2   1   13.80    1.20
  -7   2  -1   11.30    0.90
   7   2   1   12.70    0.80
   7   2   1   12.30    0.80
   7   2   1   12.20    0.90
   7   2   1    9.80    1.10
   8  -2   1   11.40    1.30
   8  -2   1    9.00    1.00
   8  -2   1    7.30    1.10
   8  -2   1   10.50    1.10
   8  -2   1    9.60    0.80
  -8   2  -1   10.40    1.00
   8   2   1    9.80    0.80
   8   2   1   10.70    1.20
   8   2   1   10.00    0.80
   8   2   1    8.30    1.10
   8   2   1   11.10    0.90
   9  -2   1   26.60    1.80
   9  -2   1   25.80    1.60
   9  -2   1   28.40    1.90
   9  -2   1   27.00    1.70
   9   2   1   29.30    1.90
   9   2   1   29.20    1.40
  -9   2  -1   28.90    1.60
   9   2   1   27.30    1.90
   9   2   1   29.00    1.50
   9   2   1   31.00    1.50
  10  -2   1   11.30    1.20
  10  -2   1   14.60    1.60
  10  -2   1   13.80    1.40
  10  -2   1   12.60    1.50
  10   2   1   13.80    1.60
  10   2   1   13.50    1.10
  10   2   1   13.10    1.50
 -10   2  -1   13.30    1.20
  10   2   1   12.70    1.10
  11  -2   1    2.70    1.00
  11  -2   1    3.70    0.90
  11  -2   1    3.80    1.10
  11   2   1    3.60    1.10
  11   2   1    2.90    0.70
  11   2   1    4.50    1.10
  12  -2   1    5.20    1.10
  12  -2   1    4.10    1.20
  12  -2   1    5.00    1.20
  12   2   1    5.30    1.20
  12   2   1    5.20    1.20
  13  -2   1    3.50    1.10
  13  -2   1    1.60    1.00
  13  -2   1    2.70    1.20
  13  -2   1    1.60    1.00
  13   2   1    1.20    1.00
  13   2   1    1.60    1.00
  13   2   1    2.80    1.00
  14  -3  -1    0.30    1.00
  14  -3  -1   -0.40    0.90
  14  -3  -1    1.30    1.00
  14  -3  -1   -0.60    0.90
  14   3  -1   -0.40    0.90
  14   3  -1    0.30    1.00
  13  -3  -1    2.50    1.10
  13  -3  -1    1.30    1.00
  13  -3  -1    1.40    1.00
  13  -3  -1    0.70    0.90
  13   3  -1    2.30    1.10
  13   3  -1    2.20    1.00
  13   3  -1    2.40    1.10
  12  -3  -1    1.60    0.90
  12  -3  -1    1.40    0.90
  12  -3  -1    0.40    0.80
  12  -3  -1    2.20    0.90
  12   3  -1    1.20    0.90
  12   3  -1    3.70    1.10
  12   3  -1    2.50    0.90
  11  -3  -1    9.70    1.40
  11  -3  -1   12.00    1.40
  11  -3  -1    9.30    1.40
  11  -3  -1    9.70    1.40
  11   3  -1   10.80    1.40
  11   3  -1   10.30    1.40
 -11   3   1   12.20    1.40
  11   3  -1    9.50    1.40
  10  -3  -1    5.70    1.00
  10  -3  -1    3.70    0.90
  10  -3  -1    5.20    1.10
  10  -3  -1    3.70    1.00
 -10   3   1    6.40    1.00
  10   3  -1    5.00    1.00
  10   3  -1    6.00    1.10
  10   3  -1    5.90    0.60
  10   3  -1    3.90    1.00
   9  -3  -1   30.80    1.80
   9  -3  -1   34.20    2.00
   9  -3  -1   28.80    1.80
   9  -3  -1   29.60    1.90
   9   3  -1   31.80    1.90
  -9   3   1   30.60    1.70
   9   3  -1   31.70    1.50
   9   3  -1   33.30    1.90
   9   3  -1   32.60    1.80
   9   3  -1   31.70    1.30
   8  -3  -1    7.20    1.00
   8  -3  -1    6.90    1.00
   8  -3  -1    7.80    0.70
   8  -3  -1    9.60    1.00
   8  -3  -1    9.20    1.10
   8   3  -1    9.60    0.70
   8   3  -1    8.60    1.00
   8   3  -1   10.00    1.20
  -8   3   1    8.40    1.00
   8   3  -1    8.10    1.00
   8   3  -1    8.90    0.80
   7  -3  -1   14.70    1.20
   7  -3  -1   13.40    1.10
   7  -3  -1   15.90    0.70
   7  -3  -1   14.70    1.10
   7  -3  -1   16.90    1.20
   7  -3  -1   15.40    1.20
   7   3  -1   15.70    1.20
   7   3  -1   14.80    1.10
   7   3  -1   15.80    0.70
   7   3  -1   16.10    0.80
  -7   3   1   16.60    1.10
   7   3  -1   14.80    0.90
   7   3  -1   15.90    0.70
   7   3  -1   16.00    1.20
   6  -3  -1    2.10    0.60
   6  -3  -1    1.40    0.50
   6  -3  -1    0.80    0.50
   6  -3  -1    2.10    0.30
   6  -3  -1    1.80    0.40
  -6  -3   1    3.30    0.70
   6   3  -1    2.40    0.30
  -6   3   1    2.30    0.50
   6   3  -1    0.80    0.40
   6   3  -1    1.20    0.50
   6   3  -1    1.70    0.30
  -6   3   1    1.80    0.50
   6   3  -1    1.90    0.40
   6   3  -1    1.90    0.20
  -5  -3   1  503.25   14.30
   5  -3  -1  505.75   14.30
   5  -3  -1  539.95   13.80
   5  -3  -1  539.95   14.30
   5  -3  -1  535.25   14.20
   5  -3  -1  536.55   14.30
   5   3  -1  520.35   13.70
   5   3  -1  524.85   13.80
   5   3  -1  506.35   14.20
  -5   3   1  540.95   14.30
  -5   3   1  560.14   14.20
   5   3  -1  537.35   13.70
   5   3  -1  517.85   14.30
   5   3  -1  527.25   14.10
  -4  -3   1   19.70    1.00
   4  -3  -1   17.50    0.90
   4  -3  -1   16.10    1.00
   4  -3  -1   15.20    0.70
   4  -3  -1   15.40    1.00
   4  -3  -1   17.10    1.00
   4   3  -1   19.20    1.00
  -4   3   1   15.50    0.90
   4   3  -1   17.10    0.90
  -4   3   1   16.00    0.90
  -4   3   1   15.80    0.90
   4   3  -1   19.00    0.60
   4   3  -1   21.20    1.00
   3  -3  -1  114.89    3.40
   3  -3  -1  116.19    3.30
   3  -3  -1  120.99    3.50
  -3  -3   1  113.89    3.50
   3  -3  -1  113.29    3.50
   3   3  -1  112.69    3.30
   3   3  -1  112.79    3.30
  -3   3   1  113.39    3.40
  -3   3   1  111.79    3.40
  -3   3   1  122.39    3.40
   2  -3  -1   10.70    0.80
   2  -3  -1   11.60    0.70
   2  -3  -1   10.10    0.60
   2  -3  -1   11.40    0.50
  -2  -3   1   10.70    0.60
   2   3  -1   11.20    0.40
   2   3  -1   11.90    0.60
  -2   3   1   10.80    0.60
  -2   3   1   11.00    0.70
   2   3  -1   10.80    0.40
  -2   3   1   10.90    0.60
   2   3  -1   11.10    0.60
   1  -3  -1  198.38    5.50
  -1  -3   1  209.48    5.50
  -1  -3   1  195.28    5.40
   1  -3  -1  196.48    5.30
   1  -3  -1  209.88    5.40
   1  -3  -1  197.48    5.50
   1   3  -1  202.88    5.30
  -1   3   1  198.78    5.20
   1   3  -1  189.08    5.30
   1   3  -1  197.88    5.20
  -1   3   1  192.98    5.30
   1   3  -1  198.08    5.20
   1   3  -1  194.38    5.20
  -1   3   1  204.88    5.40
  -1   3   1  188.18    5.20
   0  -3  -1  223.88    6.10
   0  -3   1  226.08    5.90
   0  -3  -1  227.48    6.10
   0  -3  -1  220.18    5.90
   0  -3  -1  228.68    5.90
   0  -3   1  229.98    6.10
   0  -3   1  225.38    6.10
   0  -3   1  225.58    5.90
   0  -3   1  227.88    6.10
   0   3  -1  216.38    5.80
   0   3   1  229.28    6.00
   0   3  -1  226.38    6.00
   0   3  -1  218.48    6.00
   0   3   1  230.58    6.00
   0   3  -1  225.28    6.00
   0   3   1  228.28    5.80
   0   3  -1  218.78    5.80
   0   3   1  224.18    5.80
   0   3  -1  217.78    6.00
   0   3   1  225.28    6.20
   1  -3   1    1.40    0.40
   1  -3   1    1.90    0.30
  -1  -3  -1    1.80    0.30
  -1  -3  -1    1.50    0.40
   1  -3   1    1.90    0.40
   1  -3   1    1.90    0.40
  -1   3  -1    2.40    0.30
   1   3   1    1.80    0.20
   1   3   1    1.60    0.30
  -1   3  -1    1.10    0.30
   1   3   1    2.20    0.30
  -1   3  -1    1.50    0.30
   1   3   1    1.80    0.30
  -1   3  -1    1.50    0.40
  -1   3  -1    1.60    0.20
   2  -3   1  311.57    8.30
  -2  -3  -1  305.57    8.00
  -2  -3  -1  286.77    8.30
   2  -3   1  310.07    8.20
   2  -3   1  310.17    8.20
   2  -3   1  312.67    8.30
   2   3   1  311.37    8.10
  -2   3  -1  293.97    8.20
   2   3   1  312.47    8.30
   2   3   1  318.17    8.20
  -2   3  -1  318.37    8.30
   2   3   1  304.37    8.10
  -2   3  -1  300.77    8.30
   3  -3   1   40.80    1.60
   3  -3   1   38.30    1.40
   3  -3   1   42.90    1.60
  -3  -3  -1   43.80    1.70
   3  -3   1   41.10    1.50
  -3  -3  -1   42.50    1.20
   3   3   1   44.90    1.30
   3   3   1   43.20    1.60
   3   3   1   45.20    1.60
  -3   3  -1   42.80    1.60
   3   3   1   44.30    1.30
  -3   3  -1   39.30    1.60
  -3   3  -1   41.70    1.60
  -3   3  -1   42.70    1.50
   4  -3   1   41.30    1.60
  -4  -3  -1   40.80    1.30
   4  -3   1   42.50    1.70
   4  -3   1   41.30    1.50
   4  -3   1   41.20    1.80
  -4  -3  -1   42.90    1.80
  -4   3  -1   39.80    1.50
  -4   3  -1   38.50    1.60
   4   3   1   41.90    1.20
   4   3   1   42.00    1.60
  -4   3  -1   39.10    1.60
  -4   3  -1   41.90    1.60
   4   3   1   42.20    1.30
   4   3   1   41.10    1.70
  -5  -3  -1   53.89    1.70
   5  -3   1   60.99    1.90
   5  -3   1   55.89    2.10
   5  -3   1   55.19    2.10
  -5  -3  -1   54.39    2.20
   5  -3   1   54.89    2.20
   5  -3   1   54.29    2.20
   5   3   1   54.09    1.70
   5   3   1   54.99    1.70
   5   3   1   52.79    2.20
  -5   3  -1   57.79    2.10
   5   3   1   55.09    2.20
  -5   3  -1   55.69    2.00
  -5   3  -1   56.39    2.00
   5   3   1   54.69    1.60
   5   3   1   56.29    2.00
  -5   3  -1   55.39    2.10
   6  -3   1    5.60    0.70
   6  -3   1    6.40    0.90
   6  -3   1    5.60    0.80
   6  -3   1    5.70    0.80
   6  -3   1    5.40    0.60
  -6  -3  -1    5.40    0.80
   6   3   1    5.20    0.60
  -6   3  -1    6.10    0.70
   6   3   1    5.30    0.50
   6   3   1    5.10    0.80
   6   3   1    7.80    0.90
   6   3   1    5.50    0.50
   6   3   1    5.50    0.40
  -6   3  -1    6.00    0.80
   7  -3   1   13.80    0.90
   7  -3   1   14.00    1.10
   7  -3   1   14.10    1.30
   7  -3   1   13.40    1.30
   7  -3   1   13.90    1.20
  -7  -3  -1   13.10    1.20
  -7   3  -1   13.10    1.00
  -7   3  -1   11.80    1.10
   7   3   1   13.30    0.90
   7   3   1   12.50    0.80
   7   3   1   12.40    1.20
   7   3   1   11.20    0.70
   7   3   1   13.50    1.20
   8  -3   1   24.20    1.60
   8  -3   1   23.70    1.60
   8  -3   1   21.40    1.10
   8  -3   1   23.10    1.40
   8  -3   1   21.10    1.60
  -8   3  -1   21.60    1.30
   8   3   1   24.70    1.70
   8   3   1   26.80    1.70
   8   3   1   23.20    1.10
   8   3   1   24.80    1.30
   8   3   1   22.30    1.10
   9  -3   1   17.20    1.50
   9  -3   1   15.00    1.60
   9  -3   1   12.90    1.20
   9  -3   1   15.00    1.60
   9   3   1   15.70    1.60
  -9   3  -1   15.30    1.20
   9   3   1   14.50    1.10
   9   3   1   14.50    1.50
   9   3   1   14.20    0.90
   9   3   1   14.50    1.00
  10  -3   1    2.30    0.90
  10  -3   1    2.40    0.90
  10  -3   1    2.80    1.00
  10   3   1    1.80    0.80
  10   3   1    2.70    0.60
  10   3   1    2.30    0.50
  10   3   1    2.10    0.90
 -10   3  -1    2.70    0.70
  11  -3   1    2.60    1.00
  11  -3   1    2.40    0.90
  11  -3   1    1.60    1.00
 -11   3  -1    2.60    0.80
  11   3   1    2.20    0.90
  11   3   1    3.40    1.00
  12  -3   1    0.80    0.90
  12  -3   1    1.50    1.00
  12  -3   1    1.40    1.00
  12   3   1    1.30    1.00
  12   3   1    1.90    1.00
  13  -3   1    4.30    1.30
  13  -3   1    5.20    1.40
  13  -3   1    6.80    1.30
  13  -3   1    5.70    1.30
  13   3   1    7.50    1.50
  13   3   1    7.60    1.50
  13   3   1    4.70    1.30
  13  -4  -1    5.50    1.30
  13  -4  -1    7.50    1.50
  13  -4  -1    4.70    1.20
  13  -4  -1    5.00    1.30
  13   4  -1    4.70    1.30
  13   4  -1    5.60    1.20
  13   4  -1    6.20    1.40
  12  -4  -1    1.00    0.90
  12  -4  -1    0.90    0.90
  12  -4  -1    3.00    1.00
  12  -4  -1    1.40    0.90
  12   4  -1    0.70    0.90
 -12   4   1    1.10    0.70
  12   4  -1   -0.30    0.80
  12   4  -1    1.30    0.90
  11  -4  -1    4.60    1.10
  11  -4  -1    4.90    1.10
  11  -4  -1    4.80    1.10
  11  -4  -1    4.10    1.00
  11   4  -1    4.70    1.10
 -11   4   1    6.20    1.00
  11   4  -1    7.50    1.30
  11   4  -1    6.30    1.10
  10  -4  -1    1.90    0.80
  10  -4  -1    3.20    0.90
  10  -4  -1    1.60    0.90
  10  -4  -1    2.70    0.90
 -10   4   1    2.40    0.70
  10   4  -1    2.30    0.80
  10   4  -1    2.70    0.90
  10   4  -1    2.50    0.80
   9  -4  -1   13.70    1.40
   9  -4  -1   13.60    1.40
   9  -4  -1   17.20    1.60
   9  -4  -1   16.00    1.40
   9   4  -1   13.40    1.30
   9   4  -1   14.00    1.50
   9   4  -1   13.80    0.60
   9   4  -1   13.70    1.40
  -9   4   1   14.40    1.30
   9   4  -1   13.60    1.00
   8  -4  -1   15.60    1.40
   8  -4  -1   20.30    1.50
   8  -4  -1   18.30    1.40
   8  -4  -1   17.70    1.30
  -8   4   1   18.70    1.30
   8   4  -1   16.70    1.40
   8   4  -1   16.80    0.70
   8   4  -1   14.60    1.30
   8   4  -1   17.00    1.10
   8   4  -1   18.50    1.30
   7  -4  -1   24.40    1.00
  -7  -4   1   23.40    1.50
   7  -4  -1   24.40    1.40
   7  -4  -1   23.70    1.50
   7  -4  -1   23.90    1.50
   7  -4  -1   24.60    1.50
   7   4  -1   21.10    1.40
   7   4  -1   21.40    0.80
   7   4  -1   19.30    1.10
   7   4  -1   20.20    1.30
   7   4  -1   17.70    1.20
  -7   4   1   23.20    1.30
   6  -4  -1   11.60    0.70
   6  -4  -1   12.80    1.10
  -6  -4   1   15.40    1.10
   6  -4  -1   12.80    1.00
   6  -4  -1   12.40    0.90
   6  -4  -1   11.10    1.00
   6   4  -1   13.50    0.60
  -6   4   1   11.90    1.00
   6   4  -1   11.30    0.90
   6   4  -1   11.80    1.00
  -6   4   1    9.90    0.90
   6   4  -1   13.20    0.90
   6   4  -1   12.30    0.90
   5  -4  -1   16.80    1.10
   5  -4  -1   15.60    0.90
   5  -4  -1   15.10    1.10
  -5  -4   1   16.50    1.00
   5  -4  -1   15.30    1.10
   5  -4  -1   16.10    0.70
  -5   4   1   14.00    1.00
  -5   4   1   15.20    1.00
   5   4  -1   16.70    0.60
   5   4  -1   16.50    1.00
   5   4  -1   18.10    1.00
   5   4  -1   17.40    0.90
  -5   4   1   17.10    1.10
   5   4  -1   18.10    1.10
  -4  -4   1   57.49    2.10
   4  -4  -1   55.59    1.90
   4  -4  -1   55.59    2.10
   4  -4  -1   56.99    2.20
   4  -4  -1   54.39    2.00
  -4   4   1   57.89    2.00
  -4   4   1   56.29    2.00
  -4   4   1   54.69    2.00
   4   4  -1   54.59    1.90
   4   4  -1   52.59    1.90
   4   4  -1   52.69    1.90
   3  -4  -1  150.68    4.40
   3  -4  -1  147.29    4.50
   3  -4  -1  148.69    4.30
   3  -4  -1  147.29    4.10
  -3  -4   1  150.88    4.40
  -3   4   1  149.09    4.40
   3   4  -1  150.98    4.30
  -3   4   1  150.78    4.30
   3   4  -1  150.28    4.30
  -3   4   1  152.38    4.40
   2  -4  -1    3.50    0.30
   2  -4  -1    3.60    0.50
   2  -4  -1    3.10    0.40
   2  -4  -1    2.40    0.40
  -2  -4   1    3.50    0.40
   2   4  -1    3.20    0.40
  -2   4   1    3.70    0.50
  -2   4   1    2.60    0.40
   2   4  -1    3.30    0.30
   2   4  -1    3.10    0.30
   2   4  -1    3.20    0.30
   2   4  -1    3.00    0.40
  -2   4   1    3.00    0.40
   1  -4  -1  277.77    7.50
  -1  -4   1  272.27    7.40
   1  -4  -1  272.47    7.10
  -1  -4   1  273.87    7.30
   1  -4  -1  277.77    7.40
   1  -4  -1  265.57    7.30
   1   4  -1  278.17    7.20
   1   4  -1  273.97    7.30
  -1   4   1  269.67    7.20
   1   4  -1  265.47    7.30
  -1   4   1  272.97    7.40
  -1   4   1  272.87    7.40
  -1   4   1  270.67    7.10
   1   4  -1  272.97    7.10
   1   4  -1  270.97    7.20
   0  -4   1   96.99    2.80
   0  -4   1   95.69    2.80
   0  -4   1   99.29    2.60
   0  -4  -1   91.79    2.80
   0  -4  -1   91.79    2.90
   0  -4  -1   97.69    2.80
   0  -4   1   99.09    2.60
   0  -4  -1   99.49    2.90
   0  -4  -1   98.49    2.60
   0   4  -1   97.89    2.80
   0   4  -1   93.99    2.80
   0   4   1  100.69    2.60
   0   4   1   94.69    2.80
   0   4   1   96.39    2.60
   0   4  -1   97.09    2.80
   0   4  -1   93.69    2.60
   0   4   1   99.29    2.80
   0   4  -1   94.49    2.80
   1  -4   1    3.50    0.40
   1  -4   1    5.00    0.40
   1  -4   1    3.20    0.40
   1  -4   1    3.80    0.50
  -1  -4  -1    5.80    0.60
  -1  -4  -1    4.60    0.40
  -1   4  -1    4.20    0.50
  -1   4  -1    2.90    0.40
   1   4   1    2.40    0.30
  -1   4  -1    3.80    0.40
  -1   4  -1    3.20    0.30
  -1   4  -1    3.80    0.40
   1   4   1    3.50    0.30
   1   4   1    3.20    0.40
   1   4   1    3.40    0.30
   2  -4   1   13.90    0.80
   2  -4   1   14.40    0.80
  -2  -4  -1   14.40    0.60
   2  -4   1   14.40    0.90
  -2  -4  -1   13.90    0.80
   2  -4   1   14.60    0.70
   2   4   1   15.60    0.60
  -2   4  -1   14.60    0.80
   2   4   1   16.30    0.70
  -2   4  -1   14.10    0.80
  -2   4  -1   16.60    0.80
   2   4   1   15.80    0.90
   2   4   1   14.60    0.60
  -2   4  -1   15.60    0.80
  -3  -4  -1  164.78    4.30
  -3  -4  -1  166.08    4.90
   3  -4   1  163.28    4.60
   3  -4   1  163.48    4.80
   3  -4   1  165.68    4.70
   3  -4   1  155.38    4.70
   3   4   1  158.18    4.70
  -3   4  -1  156.68    4.60
   3   4   1  163.48    4.50
  -3   4  -1  165.38    4.60
  -3   4  -1  160.18    4.70
  -3   4  -1  158.08    4.70
   3   4   1  158.28    4.30
   3   4   1  166.08    4.30
   4  -4   1   60.59    2.30
   4  -4   1   61.29    2.20
   4  -4   1   57.29    2.30
   4  -4   1   59.29    2.00
  -4  -4  -1   62.19    1.90
   4  -4   1   61.49    2.20
  -4  -4  -1   64.69    2.30
   4   4   1   56.89    1.70
  -4   4  -1   58.29    2.10
   4   4   1   61.39    2.20
  -4   4  -1   61.59    2.10
  -4   4  -1   60.49    2.20
  -4   4  -1   62.89    2.20
   4   4   1   60.99    2.20
  -5  -4  -1   47.90    2.10
   5  -4   1   47.60    1.90
   5  -4   1   45.80    1.70
   5  -4   1   48.00    2.00
   5  -4   1   46.60    2.00
   5  -4   1   47.50    1.90
   5   4   1   44.80    1.40
   5   4   1   47.00    2.00
   5   4   1   47.60    1.40
   5   4   1   45.80    1.80
  -5   4  -1   46.20    1.80
   5   4   1   47.10    1.30
  -5   4  -1   47.30    1.90
  -5   4  -1   44.10    1.80
   6  -4   1    6.30    0.80
   6  -4   1    5.00    0.80
   6  -4   1    3.80    0.80
   6  -4   1    4.70    0.60
   6  -4   1    4.40    0.80
  -6  -4  -1    5.60    0.90
   6   4   1    5.30    0.80
   6   4   1    5.60    0.70
  -6   4  -1    3.90    0.60
   6   4   1    5.50    0.80
   6   4   1    5.50    0.50
   6   4   1    4.80    0.40
   6   4   1    5.50    0.30
  -6   4  -1    5.10    0.80
  -7  -4  -1   14.20    1.30
   7  -4   1   16.00    1.00
   7  -4   1   14.00    1.20
   7  -4   1   16.10    1.40
   7  -4   1   15.10    1.30
   7  -4   1   15.90    1.30
   7   4   1   15.50    0.80
   7   4   1   17.20    1.30
   7   4   1   13.80    1.20
   7   4   1   14.60    0.70
   7   4   1   14.20    1.00
  -7   4  -1   14.90    1.20
  -7   4  -1   15.70    1.10
   8  -4   1   24.30    1.80
   8  -4   1   27.00    1.70
  -8  -4  -1   25.80    1.80
   8  -4   1   24.60    1.70
   8  -4   1   28.60    1.60
   8  -4   1   25.60    1.30
   8   4   1   28.90    1.80
  -8   4  -1   27.80    1.80
   8   4   1   27.90    1.50
   8   4   1   29.80    1.80
   8   4   1   25.00    1.20
   8   4   1   26.00    1.00
  -8   4  -1   24.00    1.50
   9  -4   1   18.10    1.60
   9  -4   1   16.30    1.40
   9  -4   1   18.60    1.70
   9  -4   1   19.00    1.60
   9   4   1   18.30    1.30
   9   4   1   16.80    1.00
   9   4   1   18.70    0.90
   9   4   1   20.10    1.70
  -9   4  -1   18.40    1.30
   9   4   1   18.30    1.60
  10  -4   1    9.40    1.30
  10  -4   1    8.60    1.30
  10  -4   1    9.00    1.40
  10   4   1    8.50    0.80
  10   4   1    7.80    1.20
 -10   4  -1    9.60    1.10
  10   4   1    8.20    1.30
  11  -4   1    1.10    0.90
  11  -4   1    1.50    0.90
  11  -4   1    0.10    0.90
  11   4   1    1.30    0.90
  11   4   1    0.80    0.80
 -11   4  -1    1.40    0.70
  12  -4   1    2.00    1.00
  12  -4   1    2.30    1.10
  12  -4   1    1.30    0.80
  12  -4   1    0.90    1.00
  12   4   1    1.00    1.00
  12   4   1    1.70    1.00
  12   4   1    1.20    0.90
  13  -4   1    5.40    1.50
  13  -4   1    8.60    1.50
  13  -4   1    5.50    1.40
  13  -4   1    8.70    1.50
  13   4   1    7.00    1.40
  13   4   1    7.90    1.60
  13   4   1    6.60    1.40
  13  -5  -1    0.60    1.00
  13  -5  -1   -1.30    0.80
  13  -5  -1    0.30    0.90
  13  -5  -1    0.50    1.00
  13   5  -1    1.00    1.00
 -13   5   1   -0.60    0.70
  13   5  -1    1.10    1.00
  12  -5  -1    1.90    1.00
  12  -5  -1    0.80    1.00
  12  -5  -1    2.90    1.10
  12  -5  -1    3.70    1.10
  12   5  -1    3.40    1.00
  12   5  -1    2.90    1.10
  12   5  -1    3.30    1.10
 -12   5   1    2.30    0.90
  11  -5  -1    2.90    0.90
  11  -5  -1    2.30    1.00
  11  -5  -1    1.40    0.90
  11  -5  -1    1.70    0.90
  11   5  -1    1.80    0.80
  11   5  -1    1.30    0.90
 -11   5   1    3.20    0.90
  11   5  -1    2.10    0.90
  10  -5  -1   21.60    1.80
  10  -5  -1   21.20    1.70
  10  -5  -1   21.10    1.80
  10  -5  -1   19.50    1.60
 -10   5   1   20.30    1.60
  10   5  -1   21.50    1.70
  10   5  -1   21.80    1.70
  10   5  -1   23.20    1.80
   9  -5  -1   34.90    2.10
   9  -5  -1   31.90    2.00
   9  -5  -1   31.90    2.00
   9  -5  -1   30.80    1.80
   9   5  -1   32.20    2.00
   9   5  -1   30.00    1.60
  -9   5   1   33.40    1.90
   9   5  -1   32.00    1.90
   9   5  -1   34.80    1.90
  -8  -5   1    5.90    1.00
   8  -5  -1    5.20    0.90
   8  -5  -1    6.70    0.90
   8  -5  -1    5.40    1.00
   8  -5  -1    6.00    1.00
  -8   5   1    5.90    0.90
   8   5  -1    7.10    1.10
   8   5  -1    6.00    0.80
   8   5  -1    6.30    0.90
   8   5  -1    6.10    0.90
   7  -5  -1   66.69    2.70
   7  -5  -1   64.79    2.70
   7  -5  -1   68.59    2.50
  -7  -5   1   60.19    2.70
   7  -5  -1   58.79    2.60
   7   5  -1   61.19    2.50
   7   5  -1   63.19    2.30
   7   5  -1   63.69    2.50
   7   5  -1   62.69    2.60
  -7   5   1   63.79    2.50
   6  -5  -1    5.70    0.70
   6  -5  -1    3.90    0.70
   6  -5  -1    5.70    0.90
  -6  -5   1    6.10    0.80
   6  -5  -1    4.40    0.70
  -6   5   1    5.80    0.80
  -6   5   1    4.60    0.70
   6   5  -1    4.50    0.60
  -6   5   1    5.20    0.70
   6   5  -1    4.00    0.70
   6   5  -1    3.90    0.60
   6   5  -1    3.50    0.60
   5  -5  -1    2.60    0.50
  -5  -5   1    2.80    0.60
   5  -5  -1    1.30    0.50
   5  -5  -1    2.10    0.60
   5  -5  -1    2.10    0.60
  -5   5   1    2.40    0.50
  -5   5   1    3.00    0.60
   5   5  -1    2.80    0.50
  -5   5   1    3.50    0.60
   5   5  -1    2.40    0.50
   5   5  -1    3.70    0.60
   4  -5  -1   78.89    2.90
   4  -5  -1   79.49    2.70
   4  -5  -1   80.49    2.80
   4  -5  -1   83.89    2.50
  -4  -5   1   82.79    2.80
   4   5  -1   83.89    2.60
  -4   5   1   80.79    2.60
   4   5  -1   79.19    2.50
  -4   5   1   77.79    2.70
   4   5  -1   74.79    2.60
  -4   5   1   76.39    2.70
  -3  -5   1   43.00    1.70
   3  -5  -1   43.40    1.40
  -3  -5   1   45.80    1.40
   3  -5  -1   45.70    1.80
   3  -5  -1   41.80    1.80
   3  -5  -1   45.70    1.60
   3   5  -1   44.60    1.50
  -3   5   1   45.30    1.70
  -3   5   1   41.00    1.70
   3   5  -1   45.70    1.70
  -3   5   1   44.50    1.60
   3   5  -1   46.10    1.30
   3   5  -1   45.30    1.60
  -2  -5   1  111.59    3.20
   2  -5  -1  101.39    3.20
   2  -5  -1  100.19    3.10
   2  -5  -1  104.39    2.90
   2  -5  -1  101.79    3.30
   2   5  -1  104.79    2.80
  -2   5   1  102.79    3.10
   2   5  -1  102.59    2.90
   2   5  -1  102.39    3.10
   2   5  -1  101.39    3.00
  -2   5   1  102.09    3.00
  -2   5   1   96.19    3.10
  -1  -5   1    7.10    0.60
   1  -5  -1    7.90    0.50
   1  -5  -1    7.60    0.30
  -1  -5   1    7.70    0.60
   1  -5  -1    7.00    0.70
   1  -5  -1    7.30    0.60
   1   5  -1    6.80    0.40
  -1   5   1    7.40    0.60
  -1   5   1    7.40    0.40
   1   5  -1    7.80    0.50
   1   5  -1    8.90    0.60
   1   5  -1    7.30    0.50
   1   5  -1    7.30    0.50
  -1   5   1    7.90    0.60
   0  -5   1   78.59    2.40
   0  -5  -1   79.99    2.50
   0  -5  -1   78.99    2.60
   0  -5  -1   81.09    2.50
   0  -5   1   78.89    2.20
   0  -5   1   81.89    2.50
   0  -5  -1   81.59    2.40
   0  -5   1   80.69    2.20
   0   5  -1   76.89    2.40
   0   5   1   78.69    2.40
   0   5  -1   79.49    2.50
   0   5  -1   80.09    2.40
   0   5   1   78.19    2.10
   0   5   1   79.09    2.40
   0   5  -1   79.29    2.10
   0   5   1   82.39    2.20
   0   5  -1   80.59    2.40
   1  -5   1  153.08    4.50
  -1  -5  -1  158.28    4.40
   1  -5   1  160.58    4.30
   1  -5   1  158.78    4.50
   1  -5   1  155.88    4.50
  -1  -5  -1  150.58    4.60
   1   5   1  162.68    4.50
  -1   5  -1  161.68    4.50
   1   5   1  157.98    4.40
  -1   5  -1  156.68    4.50
  -1   5  -1  156.28    4.50
   1   5   1  155.48    4.40
  -1   5  -1  159.98    4.50
   1   5   1  163.48    4.30
  -1   5  -1  153.98    4.50
   2  -5   1   50.39    1.80
   2  -5   1   47.70    1.70
   2  -5   1   46.00    1.80
  -2  -5  -1   47.20    1.50
   2  -5   1   48.30    1.60
  -2  -5  -1   52.79    1.90
   2   5   1   49.10    1.50
   2   5   1   50.19    1.50
  -2   5  -1   46.80    1.70
  -2   5  -1   48.20    1.70
  -2   5  -1   47.70    1.70
  -2   5  -1   46.80    1.80
   2   5   1   48.90    1.50
   2   5   1   48.10    1.60
   3  -5   1   57.79    2.30
   3  -5   1   61.59    2.10
   3  -5   1   60.39    2.10
   3  -5   1   60.99    2.20
   3  -5   1   63.49    2.30
  -3  -5  -1   65.09    2.30
  -3  -5  -1   60.69    1.70
   3   5   1   62.79    1.80
   3   5   1   62.39    2.00
  -3   5  -1   60.79    2.10
   3   5   1   63.29    1.80
  -3   5  -1   62.79    2.20
  -3   5  -1   66.29    2.20
   3   5   1   61.99    2.20
  -3   5  -1   58.69    2.20
   4  -5   1   18.50    1.20
  -4  -5  -1   14.70    1.10
   4  -5   1   19.50    1.10
   4  -5   1   17.90    1.00
   4  -5   1   19.40    1.10
   4  -5   1   18.30    1.20
   4   5   1   20.10    0.90
  -4   5  -1   19.00    1.10
  -4   5  -1   17.80    1.10
  -4   5  -1   19.00    1.00
   4   5   1   17.60    0.70
   4   5   1   17.80    1.10
   5  -5   1   57.19    2.40
  -5  -5  -1   66.69    2.60
   5  -5   1   62.29    2.40
   5  -5   1   60.39    2.50
   5  -5   1   62.19    2.10
   5  -5   1   62.09    2.30
   5   5   1   64.89    2.20
   5   5   1   65.09    2.40
   5   5   1   66.49    1.80
   5   5   1   62.59    2.40
  -5   5  -1   59.99    2.30
  -5   5  -1   61.49    2.40
  -5   5  -1   62.59    2.40
   6  -5   1   13.10    1.10
   6  -5   1    9.30    1.00
  -6  -5  -1   17.40    1.30
   6  -5   1   11.20    1.20
   6  -5   1   11.80    0.90
   6  -5   1   12.60    1.20
  -6   5  -1   14.30    1.10
  -6   5  -1   12.80    1.00
   6   5   1   14.80    1.10
   6   5   1   14.40    1.10
   6   5   1   13.80    0.60
   7  -5   1   44.20    2.20
   7  -5   1   46.80    2.10
   7  -5   1   46.90    2.30
  -7  -5  -1   42.00    2.30
   7  -5   1   46.00    2.10
   7  -5   1   46.20    1.80
   7   5   1   44.80    2.00
   7   5   1   41.60    2.10
   7   5   1   46.10    1.50
  -7   5  -1   45.40    2.10
  -7   5  -1   47.00    2.00
   7   5   1   44.10    2.10
  -8  -5  -1    4.40    0.90
   8  -5   1    3.30    0.60
   8  -5   1    4.40    1.00
   8  -5   1    3.90    0.80
   8  -5   1    3.40    0.90
   8  -5   1    3.50    0.90
   8   5   1    4.70    0.90
   8   5   1    4.00    0.70
  -8   5  -1    4.30    0.80
   8   5   1    3.20    0.40
  -8   5  -1    4.00    0.90
   8   5   1    3.40    0.90
  -9  -5  -1   39.10    2.50
   9  -5   1   41.60    2.30
   9  -5   1   42.50    2.40
   9  -5   1   40.60    2.40
   9   5   1   41.20    2.30
   9   5   1   41.20    1.50
  -9   5  -1   41.20    2.00
   9   5   1   39.10    2.30
   9   5   1   38.10    1.90
  10  -5   1   17.10    1.80
  10  -5   1   16.00    1.80
  10  -5   1   15.90    1.70
  10   5   1   15.70    1.70
 -10   5  -1   14.50    1.30
  10   5   1   15.80    2.00
  10   5   1   17.20    1.80
  11  -5   1    0.90    0.90
  11  -5   1    2.10    1.00
  11  -5   1    2.40    1.00
  11   5   1    2.00    0.90
 -11   5  -1    2.00    0.80
  11   5   1    1.70    0.90
  12  -5   1    3.20    1.20
  12  -5   1    5.10    1.20
  12  -5   1    3.50    1.20
  12  -5   1    3.70    1.10
  12   5   1    4.40    1.20
  12   5   1    2.20    1.10
  12   5   1    5.20    1.20
  13  -5   1    4.80    1.30
  13  -5   1    7.60    1.50
  13  -5   1    6.40    1.40
  13  -5   1    4.10    1.30
  13   5   1    5.40    1.30
  13   5   1    5.10    1.30
  13   5   1    4.80    1.30
  13  -6  -1   12.00    1.80
  13  -6  -1    8.50    1.50
  13  -6  -1   10.50    1.70
  13  -6  -1   10.80    1.70
  13   6  -1    9.80    1.60
 -13   6   1   13.50    1.70
  13   6  -1   12.70    1.80
  12  -6  -1    7.30    1.30
  12  -6  -1    8.20    1.40
  12  -6  -1    8.60    1.50
  12  -6  -1    6.20    1.50
 -12   6   1    7.70    1.30
  12   6  -1    8.00    1.40
  12   6  -1    7.20    1.30
  12   6  -1    3.80    1.20
  11  -6  -1    0.50    0.90
  11  -6  -1    0.20    0.80
  11  -6  -1    1.20    1.00
  11  -6  -1    1.20    0.80
  11   6  -1    1.20    0.80
  11   6  -1    1.40    0.90
  11   6  -1    1.40    0.90
 -11   6   1    1.90    0.80
  10  -6  -1    2.50    0.90
  10  -6  -1    2.50    1.00
  10  -6  -1    2.30    0.80
  10  -6  -1    2.20    0.90
  10   6  -1    1.60    0.90
  10   6  -1    1.10    0.80
  10   6  -1    2.70    0.80
 -10   6   1    3.50    0.90
   9  -6  -1   19.50    1.60
   9  -6  -1   17.00    1.40
  -9  -6   1   15.60    1.50
   9  -6  -1   18.70    1.80
   9  -6  -1   23.20    1.70
   9   6  -1   18.40    1.50
   9   6  -1   21.70    1.70
   9   6  -1   18.00    1.20
  -9   6   1   18.00    1.50
   9   6  -1   17.90    1.50
   8  -6  -1    5.60    1.10
   8  -6  -1    5.00    0.90
   8  -6  -1    3.90    0.80
  -8  -6   1    4.80    1.00
   8  -6  -1    5.70    1.00
   8   6  -1    5.30    1.00
   8   6  -1    3.00    0.80
   8   6  -1    3.90    0.80
  -8   6   1    5.00    0.90
   8   6  -1    4.70    0.80
   7  -6  -1   50.19    2.30
   7  -6  -1   49.99    2.00
   7  -6  -1   46.70    2.40
   7  -6  -1   48.90    2.20
  -7  -6   1   45.70    2.30
  -7   6   1   49.80    2.20
  -7   6   1   52.59    2.30
   7   6  -1   48.40    2.20
   7   6  -1   50.49    2.10
   7   6  -1   45.80    2.10
   7   6  -1   46.60    2.10
  -6  -6   1   62.99    2.50
   6  -6  -1   59.89    2.50
   6  -6  -1   56.99    2.40
   6  -6  -1   54.89    2.10
   6  -6  -1   62.99    2.60
   6   6  -1   56.29    2.20
  -6   6   1   56.99    2.30
  -6   6   1   58.79    2.40
   6   6  -1   59.99    2.30
  -6   6   1   58.69    2.40
   6   6  -1   59.69    2.30
   6   6  -1   56.59    2.20
   6   6  -1   62.19    2.30
   5  -6  -1   24.50    1.40
   5  -6  -1   24.10    1.40
   5  -6  -1   23.50    1.10
   5  -6  -1   25.70    1.30
  -5  -6   1   24.60    1.40
   5   6  -1   24.50    1.20
   5   6  -1   25.70    1.30
  -5   6   1   25.60    1.30
  -5   6   1   25.30    1.40
  -5   6   1   24.70    1.40
   5   6  -1   24.20    1.30
   5   6  -1   22.40    1.20
   4  -6  -1    2.60    0.50
   4  -6  -1    2.90    0.40
   4  -6  -1    2.60    0.50
  -4  -6   1    1.70    0.40
   4  -6  -1    2.50    0.60
   4   6  -1    3.10    0.50
  -4   6   1    2.40    0.50
  -4   6   1    1.90    0.50
  -4   6   1    3.10    0.60
   4   6  -1    2.90    0.50
   4   6  -1    2.70    0.50
  -3  -6   1  196.88    5.20
  -3  -6   1  198.18    5.70
   3  -6  -1  188.18    5.70
   3  -6  -1  193.58    5.50
   3  -6  -1  196.28    5.80
   3  -6  -1  195.68    5.30
   3   6  -1  194.08    5.50
   3   6  -1  200.18    5.30
  -3   6   1  193.48    5.60
   3   6  -1  196.88    5.60
  -3   6   1  194.08    5.70
  -3   6   1  196.38    5.70
   3   6  -1  199.68    5.40
   2  -6  -1    7.90    0.80
  -2  -6   1    9.30    0.60
  -2  -6   1    9.10    0.70
   2  -6  -1    9.30    0.40
   2  -6  -1    8.60    0.80
   2  -6  -1    9.10    0.70
  -2   6   1    7.60    0.70
   2   6  -1    8.40    0.50
   2   6  -1    8.40    0.50
  -2   6   1    7.00    0.70
  -2   6   1    8.80    0.60
   2   6  -1    8.80    0.60
   2   6  -1    8.90    0.70
  -1  -6   1  128.89    3.70
   1  -6  -1  121.19    3.80
   1  -6  -1  116.09    3.70
  -1  -6   1  123.69    3.60
   1  -6  -1  122.49    3.60
  -1  -6   1  127.19    3.70
  -1   6   1  118.99    3.40
   1   6  -1  122.39    3.30
   1   6  -1  125.29    3.70
   1   6  -1  124.19    3.50
  -1   6   1  118.29    3.70
  -1   6   1  126.19    3.70
   1   6  -1  121.59    3.50
   0  -6   1  131.89    3.80
   0  -6   1  127.89    3.40
   0  -6   1  129.19    3.50
   0  -6  -1  128.39    3.80
   0  -6  -1  126.49    3.90
   0  -6  -1  122.19    3.70
   0  -6  -1  129.69    3.90
   0  -6   1  125.69    3.80
   0   6  -1  123.79    3.80
   0   6   1  128.89    3.70
   0   6   1  130.29    3.50
   0   6  -1  123.49    3.70
   0   6   1  119.69    3.70
   0   6  -1  133.19    3.70
   1  -6   1  401.76   11.00
   1  -6   1  400.16   11.00
  -1  -6  -1  433.36   11.10
   1  -6   1  404.36   10.90
  -1  -6  -1  397.46   10.80
  -1  -6  -1  401.66   10.80
   1  -6   1  393.26   10.70
  -1   6  -1  400.56   10.80
   1   6   1  398.96   10.40
  -1   6  -1  408.06   10.80
  -1   6  -1  398.46   10.70
   1   6   1  398.36   10.70
  -1   6  -1  398.36   10.60
  -1   6  -1  384.36   10.70
   1   6   1  389.76   10.60
   1   6   1  401.86   10.70
   2  -6   1  237.58    7.00
   2  -6   1  250.47    7.00
  -2  -6  -1  269.67    7.20
   2  -6   1  244.08    7.10
   2  -6   1  244.78    6.70
  -2  -6  -1  248.28    6.70
   2  -6   1  244.38    7.00
   2   6   1  253.47    6.60
  -2   6  -1  243.28    6.80
   2   6   1  234.48    6.50
  -2   6  -1  248.68    6.90
  -2   6  -1  241.38    6.80
   2   6   1  251.77    6.60
   2   6   1  234.98    6.70
   3  -6   1  122.09    3.80
  -3  -6  -1  122.89    3.40
   3  -6   1  126.39    3.90
   3  -6   1  129.09    3.70
  -3  -6  -1  124.89    4.00
   3  -6   1  122.39    3.90
   3  -6   1  123.39    4.00
  -3   6  -1  129.29    3.80
   3   6   1  129.09    3.60
  -3   6  -1  123.79    3.90
   3   6   1  126.99    3.70
  -3   6  -1  119.79    3.80
   3   6   1  125.79    3.50
   3   6   1  125.29    4.00
  -4  -6  -1   64.09    2.50
   4  -6   1   61.59    2.20
   4  -6   1   67.99    2.40
   4  -6   1   61.19    2.20
   4  -6   1   62.99    2.40
   4  -6   1   64.59    2.50
  -4   6  -1   67.79    2.40
   4   6   1   63.09    2.10
   4   6   1   65.99    2.20
  -4   6  -1   66.99    2.40
   4   6   1   65.49    2.40
   4   6   1   63.49    1.90
  -4   6  -1   62.49    2.40
   5  -6   1    8.60    1.00
   5  -6   1    7.40    0.70
   5  -6   1    8.00    0.90
  -5  -6  -1    8.00    1.00
   5  -6   1    6.70    0.90
   5  -6   1    8.20    0.90
   5   6   1    7.50    0.40
   5   6   1    8.10    0.70
  -5   6  -1    8.20    0.90
   5   6   1    8.80    1.00
  -5   6  -1    9.00    0.80
  -5   6  -1    7.00    0.80
   5   6   1    7.60    0.90
   6  -6   1    5.00    0.90
   6  -6   1    3.70    0.80
   6  -6   1    5.30    0.80
  -6  -6  -1    3.90    0.80
   6  -6   1    4.10    0.60
   6  -6   1    3.40    0.70
   6   6   1    5.50    0.80
   6   6   1    4.30    0.40
  -6   6  -1    4.60    0.70
   6   6   1    4.90    0.60
   6   6   1    5.40    0.80
  -6   6  -1    3.90    0.80
   7  -6   1   53.89    2.00
   7  -6   1   54.69    2.60
   7  -6   1   52.59    2.30
   7  -6   1   54.49    2.50
  -7  -6  -1   48.10    2.50
   7  -6   1   56.09    2.40
  -7   6  -1   53.79    2.50
  -7   6  -1   54.59    2.30
   7   6   1   56.29    2.50
   7   6   1   58.49    2.20
   7   6   1   57.39    2.40
   7   6   1   58.29    2.50
   7   6   1   53.79    1.70
   8  -6   1    0.70    0.70
   8  -6   1    1.70    0.60
   8  -6   1    2.10    0.80
   8  -6   1    0.20    0.70
  -8  -6  -1    1.10    0.70
   8  -6   1    1.40    0.50
   8   6   1    1.00    0.70
   8   6   1    1.10    0.60
   8   6   1    0.10    0.60
   8   6   1    0.50    0.30
  -8   6  -1    0.40    0.50
  -8   6  -1    1.20    0.70
   9  -6   1   49.00    2.60
  -9  -6  -1   45.40    2.60
   9  -6   1   42.40    2.40
   9  -6   1   46.40    2.50
   9   6   1   48.00    1.70
  -9   6  -1   46.70    2.30
  -9   6  -1   45.90    2.50
   9   6   1   51.09    2.30
   9   6   1   49.50    2.60
   9   6   1   53.09    2.60
  10  -6   1   11.20    1.50
  10  -6   1    7.90    1.40
 -10  -6  -1    8.00    1.40
  10  -6   1    7.00    1.20
  10   6   1    7.20    1.30
 -10   6  -1    7.90    1.10
  10   6   1    8.30    1.40
  10   6   1    7.40    1.00
  11  -6   1    3.50    1.20
  11  -6   1    3.20    1.00
  11  -6   1    3.40    1.20
 -11   6  -1    3.00    0.90
  11   6   1    3.00    1.00
  11   6   1    4.00    1.20
  12  -6   1   12.90    1.60
  12  -6   1    9.50    1.60
  12  -6   1   10.90    1.60
  12  -6   1   12.10    1.70
  12   6   1   12.20    1.70
  12   6   1    8.60    1.50
  12   6   1   10.80    1.50
  13  -6   1    1.40    1.10
  13  -6   1    2.20    1.20
  13  -6   1    2.70    1.20
  13  -6   1    2.20    1.10
  13   6   1    3.30    1.10
  13   6   1    2.20    1.20
  13   6   1    3.10    1.20
  13  -7  -1    1.60    1.00
  13  -7  -1    1.30    1.10
  13  -7  -1    1.00    1.10
  13  -7  -1    1.00    1.10
  13   7  -1    0.00    1.00
  13   7  -1    3.00    1.20
 -13   7   1    0.60    0.90
  12  -7  -1    4.80    1.30
  12  -7  -1    3.40    1.10
  12  -7  -1    4.60    1.10
  12  -7  -1    6.10    1.50
  12   7  -1    4.80    1.20
  12   7  -1    2.90    1.10
  12   7  -1    4.00    1.10
  11  -7  -1   32.50    2.10
  11  -7  -1   30.70    2.30
  11  -7  -1   27.40    2.20
  11  -7  -1   32.70    2.30
  11   7  -1   30.20    2.20
  11   7  -1   27.60    2.10
 -11   7   1   22.10    1.80
  11   7  -1   30.40    2.00
  10  -7  -1   14.90    1.70
  10  -7  -1   14.90    1.60
  10  -7  -1   15.40    1.50
  10  -7  -1   15.30    1.80
  10   7  -1   15.50    1.60
  10   7  -1   16.70    1.70
 -10   7   1   13.30    1.50
  10   7  -1   12.40    1.50
   9  -7  -1    6.60    1.20
  -9  -7   1    6.90    1.20
   9  -7  -1    6.10    1.10
   9  -7  -1    7.50    1.30
   9  -7  -1    9.50    1.10
   9   7  -1    6.90    1.10
  -9   7   1    7.50    1.10
   9   7  -1    6.20    1.00
   9   7  -1    9.30    1.00
   9   7  -1    6.40    1.00
   8  -7  -1   21.00    1.60
   8  -7  -1   23.40    1.80
   8  -7  -1   19.50    1.60
   8  -7  -1   21.90    1.40
  -8  -7   1   24.00    1.70
   8   7  -1   20.00    1.50
   8   7  -1   24.20    1.50
  -8   7   1   18.90    1.50
   8   7  -1   24.30    1.60
   8   7  -1   24.10    1.60
   8   7  -1   22.40    1.50
   7  -7  -1   54.19    2.20
   7  -7  -1   53.69    2.50
   7  -7  -1   48.80    2.50
  -7  -7   1   52.39    2.40
   7  -7  -1   55.99    2.40
   7   7  -1   55.99    2.40
   7   7  -1   55.09    2.30
   7   7  -1   53.19    2.30
   7   7  -1   58.39    2.40
   7   7  -1   56.29    2.30
  -7   7   1   57.09    2.50
  -7   7   1   55.49    2.50
   7   7  -1   57.29    2.40
   6  -7  -1    8.00    1.00
   6  -7  -1    8.00    0.90
   6  -7  -1    7.10    0.70
   6  -7  -1    8.10    1.10
  -6  -7   1    7.30    0.90
   6   7  -1    5.80    0.80
  -6   7   1    5.30    0.80
   6   7  -1    7.90    0.90
   6   7  -1    9.00    0.90
  -6   7   1    6.40    0.90
   6   7  -1    8.40    0.90
   6   7  -1    6.80    0.80
   6   7  -1    8.00    0.90
  -6   7   1    7.80    0.90
  -5  -7   1   53.79    2.30
   5  -7  -1   54.09    2.30
   5  -7  -1   52.29    1.90
   5  -7  -1   54.29    2.40
   5  -7  -1   54.89    2.20
  -5   7   1   54.49    2.30
  -5   7   1   54.39    2.20
   5   7  -1   54.89    2.00
   5   7  -1   56.99    2.10
   5   7  -1   50.69    2.10
   5   7  -1   54.59    2.00
  -5   7   1   53.89    2.20
  -4  -7   1    9.40    0.90
   4  -7  -1   11.20    0.90
   4  -7  -1   11.00    0.70
   4  -7  -1   10.90    1.10
   4  -7  -1   11.20    1.10
  -4   7   1    9.70    0.90
  -4   7   1    9.90    0.80
   4   7  -1   11.10    0.80
   4   7  -1   10.50    0.80
   4   7  -1   10.80    0.70
   4   7  -1   10.80    0.50
  -4   7   1   11.70    1.00
   3  -7  -1    4.00    0.70
   3  -7  -1    4.70    0.40
   3  -7  -1    5.20    0.70
  -3  -7   1    3.80    0.60
   3  -7  -1    3.70    0.60
  -3  -7   1    4.70    0.40
  -3   7   1    3.10    0.60
   3   7  -1    4.90    0.60
   3   7  -1    5.30    0.50
  -3   7   1    4.60    0.60
   3   7  -1    4.80    0.40
   3   7  -1    5.70    0.50
  -3   7   1    5.30    0.60
   2  -7  -1   21.10    1.30
   2  -7  -1   22.60    0.70
   2  -7  -1   23.00    1.20
  -2  -7   1   22.50    1.00
  -2  -7   1   21.50    1.10
   2  -7  -1   22.70    1.10
  -2   7   1   23.10    1.20
   2   7  -1   22.50    0.90
   2   7  -1   23.80    1.00
   2   7  -1   23.30    1.20
   2   7  -1   22.20    1.00
  -2   7   1   22.80    1.00
  -2   7   1   22.90    1.20
   1  -7  -1  947.31   24.70
  -1  -7   1  920.91   24.50
   1  -7  -1  950.20   24.50
  -1  -7   1  944.81   24.60
   1  -7  -1  948.91   24.70
  -1  -7   1  902.91   24.70
  -1   7   1  919.41   24.20
  -1   7   1  948.01   24.20
   1   7  -1  911.51   24.20
   1   7  -1  895.21   24.10
  -1   7   1  922.61   24.00
   1   7  -1  891.71   23.80
  -1   7   1  938.01   24.20
   1   7  -1  894.31   24.00
   1   7  -1  964.00   24.10
   0  -7  -1  288.87    7.90
   0  -7   1  276.27    8.00
   0  -7  -1  287.57    8.00
   0  -7   1  280.67    8.00
   0  -7  -1  287.47    7.80
   0  -7  -1  291.47    8.10
   0  -7   1  283.77    8.00
   0  -7   1  290.17    7.60
   0   7  -1  283.57    8.00
   0   7  -1  283.77    7.80
   0   7   1  289.47    7.90
   0   7  -1  290.17    7.90
   0   7  -1  286.47    7.90
   0   7   1  292.27    8.00
   0   7   1  286.27    7.70
   1  -7   1  377.66   10.50
  -1  -7  -1  371.46   10.30
   1  -7   1  376.96   10.50
   1  -7   1  387.26   10.10
  -1  -7  -1  386.16   10.30
  -1  -7  -1  387.96   10.60
  -1   7  -1  382.56   10.20
  -1   7  -1  381.86   10.30
   1   7   1  365.26   10.30
  -1   7  -1  382.96   10.40
  -1   7  -1  380.36   10.30
   1   7   1  378.66   10.20
   1   7   1  383.06   10.00
   2  -7   1   58.89    2.20
   2  -7   1   62.09    2.30
  -2  -7  -1   56.29    2.20
  -2  -7  -1   57.89    1.90
   2  -7   1   57.69    2.10
   2  -7   1   60.49    1.90
   2   7   1   59.69    1.90
  -2   7  -1   58.79    2.20
   2   7   1   63.59    2.10
  -2   7  -1   58.09    2.20
   2   7   1   59.09    1.90
  -2   7  -1   60.09    2.10
   3  -7   1   28.50    1.50
   3  -7   1   27.10    1.20
  -3  -7  -1   25.60    1.40
  -3  -7  -1   26.10    1.00
   3  -7   1   30.70    1.40
   3  -7   1   28.60    1.50
   3  -7   1   25.80    1.40
   3   7   1   27.30    1.00
   3   7   1   28.40    1.10
  -3   7  -1   29.20    1.40
  -3   7  -1   29.60    1.40
  -3   7  -1   27.40    1.30
   3   7   1   28.10    1.20
  -4  -7  -1    9.10    1.00
   4  -7   1   10.10    1.10
   4  -7   1    8.90    1.00
   4  -7   1    7.00    0.80
   4  -7   1    7.60    0.80
   4  -7   1    7.40    0.70
   4   7   1    7.90    0.60
  -4   7  -1   10.50    1.00
   4   7   1    8.90    0.50
  -4   7  -1    9.50    0.90
   4   7   1    7.90    0.90
   4   7   1    7.30    0.70
  -4   7  -1   10.10    0.90
  -5  -7  -1   93.29    3.50
   5  -7   1   92.09    3.10
   5  -7   1   96.39    3.10
   5  -7   1   88.59    3.40
   5  -7   1   94.39    3.30
   5  -7   1   92.19    3.50
   5   7   1   96.19    3.00
   5   7   1   90.09    3.00
  -5   7  -1   95.59    3.30
  -5   7  -1   92.69    3.20
   5   7   1   92.79    2.60
  -5   7  -1   90.19    3.20
   5   7   1   90.79    3.30
   6  -7   1    3.90    0.70
   6  -7   1    3.00    0.60
   6  -7   1    3.30    0.70
   6  -7   1    3.00    0.80
  -6  -7  -1    3.90    0.90
   6  -7   1    3.20    0.80
  -6   7  -1    3.50    0.70
  -6   7  -1    2.60    0.70
   6   7   1    3.30    0.70
  -6   7  -1    1.30    0.80
   6   7   1    3.10    0.70
   6   7   1    4.50    0.60
   7  -7   1   65.29    3.00
   7  -7   1   67.09    2.70
   7  -7   1   65.19    2.40
   7  -7   1   72.99    3.00
  -7  -7  -1   62.39    2.90
   7   7   1   72.79    2.90
  -7   7  -1   67.29    2.70
   7   7   1   72.39    2.50
  -7   7  -1   67.39    2.80
   7   7   1   62.29    2.80
   7   7   1   67.89    2.70
   8  -7   1   13.80    1.50
   8  -7   1   12.20    1.50
  -8  -7  -1   16.50    1.60
   8  -7   1   11.80    1.00
   8  -7   1   10.90    1.30
   8   7   1   11.60    1.40
  -8   7  -1   14.30    1.50
   8   7   1   12.50    0.60
   8   7   1   15.40    1.50
  -8   7  -1   10.30    1.20
   8   7   1   14.70    1.20
   8   7   1   15.80    1.10
   9  -7   1    6.80    1.20
  -9  -7  -1    6.90    1.30
   9  -7   1    5.50    1.10
   9  -7   1    5.10    1.10
   9   7   1    7.20    1.10
   9   7   1    5.10    1.10
  -9   7  -1    6.70    1.10
  -9   7  -1    7.30    1.20
   9   7   1    8.10    1.20
   9   7   1    5.50    0.90
  10  -7   1    9.90    1.50
  10  -7   1   11.10    1.40
  10  -7   1    9.90    1.60
 -10  -7  -1   12.20    1.70
 -10   7  -1    8.90    1.20
  10   7   1   10.00    1.20
  10   7   1    8.10    1.30
  10   7   1    6.70    1.20
  11  -7   1   10.70    1.50
  11  -7   1   12.10    1.50
  11  -7   1   13.30    1.70
  11  -7   1   16.20    1.90
 -11   7  -1   13.40    1.50
  11   7   1   14.40    1.70
  11   7   1   13.70    1.70
  11   7   1   11.60    1.60
  12  -7   1    1.30    1.10
  12  -7   1    1.00    1.10
  12  -7   1    1.70    1.20
  12  -7   1    2.00    1.00
  12   7   1    0.70    0.90
  12   7   1    0.50    0.90
  12   7   1    0.30    0.90
  12  -8  -1    5.60    1.30
  12  -8  -1    4.80    1.30
  12  -8  -1    3.40    1.10
  12  -8  -1    8.60    1.70
  12   8  -1    3.00    1.10
  12   8  -1    5.30    1.20
  12   8  -1    6.70    1.30
 -12   8   1    4.60    1.10
  11  -8  -1   -0.40    0.70
  11  -8  -1    0.20    0.80
  11  -8  -1    0.50    0.90
  11  -8  -1    0.20    1.10
  11   8  -1    0.90    0.90
  11   8  -1    0.00    0.70
  11   8  -1    0.70    0.80
 -11   8   1   -1.40    0.60
  11   8  -1    0.60    0.80
  10  -8  -1    2.50    1.00
  10  -8  -1    1.90    0.90
 -10  -8   1    5.40    1.20
  10  -8  -1    2.70    0.80
  10  -8  -1    3.30    1.20
  10   8  -1    5.20    0.90
  10   8  -1    2.70    0.80
  10   8  -1    2.40    0.80
  10   8  -1    3.70    1.00
  10   8  -1    5.10    1.00
 -10   8   1    3.70    0.90
   9  -8  -1    7.40    1.00
   9  -8  -1    6.00    1.10
   9  -8  -1    7.80    1.30
  -9  -8   1    6.20    1.20
   9  -8  -1    5.90    1.20
   9   8  -1    8.30    1.20
  -9   8   1    9.30    1.20
   9   8  -1    8.30    1.10
   9   8  -1    8.10    1.10
   9   8  -1    7.10    1.00
   9   8  -1    9.00    1.20
   9   8  -1    7.30    1.10
  -8  -8   1   11.60    1.40
   8  -8  -1   14.00    1.60
   8  -8  -1   12.90    1.50
   8  -8  -1   11.80    1.30
   8  -8  -1   12.70    1.20
   8   8  -1   15.60    1.40
   8   8  -1   11.70    1.20
   8   8  -1   12.60    1.30
   8   8  -1   12.70    1.20
  -8   8   1   12.30    1.40
   8   8  -1   12.50    1.30
  -8   8   1   11.60    1.30
   8   8  -1   10.60    1.10
  -7  -8   1    7.70    1.10
   7  -8  -1    5.20    0.70
   7  -8  -1    6.00    1.10
   7  -8  -1    8.20    1.10
   7  -8  -1    5.70    1.00
  -7   8   1    5.90    1.00
   7   8  -1    7.70    0.90
  -7   8   1    5.50    1.00
   7   8  -1    7.20    1.00
   7   8  -1    6.80    1.00
   7   8  -1    6.70    0.90
   7   8  -1    5.10    0.80
   7   8  -1    6.60    0.90
   6  -8  -1    6.60    1.00
  -6  -8   1    7.40    1.00
   6  -8  -1    5.00    0.70
   6  -8  -1    4.30    1.00
   6  -8  -1    7.50    0.90
   6   8  -1    7.60    0.90
  -6   8   1    8.30    1.00
   6   8  -1    7.40    0.80
  -6   8   1    7.00    0.90
  -6   8   1    6.00    0.90
   6   8  -1    8.00    0.90
   6   8  -1    8.00    0.90
   5  -8  -1   34.20    1.90
  -5  -8   1   32.90    1.70
   5  -8  -1   33.10    1.60
   5  -8  -1   32.70    1.80
   5  -8  -1   34.30    1.40
  -5   8   1   33.50    1.60
  -5   8   1   31.20    1.70
  -5   8   1   34.30    1.70
   5   8  -1   33.20    1.50
   5   8  -1   36.60    1.70
   5   8  -1   32.00    1.10
   5   8  -1   37.30    1.50
   4  -8  -1   38.50    1.30
  -4  -8   1   39.40    1.80
   4  -8  -1   37.40    1.70
   4  -8  -1   36.50    1.80
   4  -8  -1   35.90    1.90
  -4   8   1   41.40    1.80
   4   8  -1   39.20    1.60
   4   8  -1   40.40    1.70
   4   8  -1   40.20    1.30
  -4   8   1   38.70    1.80
   4   8  -1   39.20    1.30
   4   8  -1   40.20    1.50
  -4   8   1   41.90    1.70
   3  -8  -1   16.90    1.30
  -3  -8   1   18.90    1.10
   3  -8  -1   19.50    1.20
  -3  -8   1   17.60    0.80
   3  -8  -1   16.90    1.00
   3  -8  -1   17.90    0.70
   3   8  -1   18.70    0.90
  -3   8   1   20.20    1.10
   3   8  -1   20.20    1.00
   3   8  -1   19.30    0.90
  -3   8   1   20.50    1.20
   3   8  -1   19.20    0.90
   3   8  -1   18.70    1.10
  -3   8   1   21.80    1.20
   2  -8  -1  175.48    5.40
   2  -8  -1  176.18    5.50
   2  -8  -1  189.38    5.20
  -2  -8   1  173.58    5.40
  -2  -8   1  177.38    5.10
  -2   8   1  188.28    5.40
  -2   8   1  169.98    5.30
   2   8  -1  182.98    5.00
   2   8  -1  179.68    4.80
   2   8  -1  176.58    5.10
   2   8  -1  174.48    5.30
   2   8  -1  178.88    5.00
  -2   8   1  175.48    5.10
  -1  -8   1  143.59    4.30
   1  -8  -1  136.09    4.50
   1  -8  -1  144.29    4.40
  -1  -8   1  143.99    4.40
  -1  -8   1  145.89    4.40
   1  -8  -1  141.19    4.40
   1  -8  -1  145.99    4.20
  -1   8   1  143.99    4.30
   1   8  -1  144.49    4.20
  -1   8   1  148.39    4.30
  -1   8   1  141.49    4.00
  -1   8   1  133.39    4.30
   1   8  -1  140.59    4.30
   1   8  -1  143.19    4.10
   1   8  -1  142.79    4.20
   1   8  -1  140.59    3.80
   0  -8   1   99.09    3.30
   0  -8  -1  100.09    3.40
   0  -8   1   99.19    2.90
   0  -8  -1  100.49    3.20
   0  -8   1   99.29    3.20
   0  -8  -1   94.89    3.00
   0  -8   1   97.09    3.20
   0   8  -1   98.59    3.10
   0   8  -1  103.39    3.20
   0   8   1  101.29    3.20
   0   8  -1   98.99    3.30
   0   8   1   98.59    3.10
   0   8   1   96.29    2.90
   0   8  -1  100.29    3.10
   1  -8   1  142.99    3.90
   1  -8   1  136.89    4.30
  -1  -8  -1  131.59    4.10
   1  -8   1  136.89    4.30
  -1  -8  -1  132.59    4.30
   1   8   1  134.09    3.80
  -1   8  -1  136.59    4.00
  -1   8  -1  137.19    4.10
  -1   8  -1  128.19    4.10
  -1   8  -1  131.19    4.10
   1   8   1  133.69    4.00
   1   8   1  133.99    4.10
   2  -8   1    7.80    0.60
   2  -8   1    7.70    0.80
   2  -8   1    8.10    0.90
  -2  -8  -1    7.20    0.90
  -2  -8  -1    7.40    0.60
   2   8   1    8.00    0.60
   2   8   1    8.10    0.50
  -2   8  -1    7.80    0.70
   2   8   1    8.40    0.80
  -2   8  -1    9.50    0.90
  -2   8  -1    8.00    0.80
   3  -8   1   59.69    2.10
   3  -8   1   61.09    2.40
  -3  -8  -1   62.89    1.90
  -3  -8  -1   58.09    2.40
   3  -8   1   58.79    2.50
   3   8   1   59.89    1.90
   3   8   1   62.59    2.20
   3   8   1   60.89    2.00
  -3   8  -1   59.59    2.30
  -3   8  -1   59.69    2.30
  -3   8  -1   59.09    2.20
   4  -8   1   10.30    0.90
   4  -8   1   11.50    1.20
  -4  -8  -1    9.70    1.10
   4  -8   1   11.40    1.10
   4   8   1   10.20    0.80
  -4   8  -1    9.90    1.00
   4   8   1   10.00    0.60
  -4   8  -1   11.10    1.00
   4   8   1   10.70    1.10
  -4   8  -1    9.90    1.00
   4   8   1    9.10    0.70
   5  -8   1   88.59    3.00
   5  -8   1   85.69    3.00
   5  -8   1   85.49    3.40
   5  -8   1   87.29    3.30
  -5  -8  -1   85.09    3.30
   5   8   1   79.09    2.40
   5   8   1   81.09    2.80
   5   8   1   79.69    2.70
   5   8   1   83.09    3.10
  -5   8  -1   86.29    3.00
  -5   8  -1   89.19    3.10
   6  -8   1   18.50    1.20
   6  -8   1   22.10    1.60
   6  -8   1   18.30    1.60
  -6  -8  -1   24.20    1.60
   6  -8   1   20.50    1.40
   6   8   1   19.40    1.40
  -6   8  -1   16.60    1.30
   6   8   1   18.20    1.10
   6   8   1   24.10    1.50
   6   8   1   20.50    1.20
  -6   8  -1   21.30    1.50
   7  -8   1    6.80    1.00
  -7  -8  -1    6.20    1.10
   7  -8   1    4.90    1.10
   7  -8   1    7.20    0.90
   7  -8   1    7.10    1.20
   7   8   1    5.90    0.90
  -7   8  -1    6.20    0.90
   7   8   1    7.40    0.80
   7   8   1    6.80    0.80
   7   8   1    6.80    1.10
  -7   8  -1    6.00    1.10
   8  -8   1    9.10    1.00
   8  -8   1    8.50    1.30
   8  -8   1   11.60    1.30
  -8  -8  -1   11.80    1.50
   8  -8   1    8.50    1.30
   8   8   1   12.50    1.30
  -8   8  -1    9.30    1.10
   8   8   1   11.10    1.40
  -8   8  -1   10.50    1.30
   8   8   1   10.00    1.00
   8   8   1    8.50    1.20
  -9  -8  -1    5.90    1.20
   9  -8   1    6.30    1.30
   9  -8   1    5.70    1.30
   9  -8   1    5.40    1.10
   9   8   1    7.40    1.20
  -9   8  -1    6.10    1.10
  -9   8  -1    6.80    1.10
   9   8   1    4.80    1.00
   9   8   1    5.00    0.90
  10  -8   1   16.50    1.60
  10  -8   1   15.70    2.00
 -10  -8  -1   14.00    1.80
  10  -8   1   15.00    1.60
  10  -8   1   17.00    1.90
  10   8   1   11.60    1.50
  10   8   1   13.80    1.70
  10   8   1   12.50    1.40
 -10   8  -1   16.30    1.80
 -10   8  -1   15.30    1.60
  10   8   1   19.00    1.80
  11  -8   1   29.80    2.70
  11  -8   1   25.90    1.90
  11  -8   1   24.10    2.10
  11  -8   1   27.30    2.30
 -11  -8  -1   27.80    2.40
  11   8   1   25.50    2.20
  11   8   1   22.70    2.00
  11   8   1   29.60    2.20
 -11   8  -1   22.00    1.80
  12  -8   1    7.00    1.40
  12  -8   1    6.10    1.50
  12  -8   1    5.80    1.20
  12  -8   1    4.20    1.30
  12   8   1    4.20    1.20
  12   8   1    7.20    1.40
  12   8   1    7.70    1.40
  12  -9  -1    1.70    1.30
  12  -9  -1    1.60    1.10
  12  -9  -1   -0.30    0.90
  12   9  -1    0.80    0.80
 -12   9   1    0.60    0.80
  12   9  -1    0.70    1.00
  12   9  -1    1.00    0.90
  11  -9  -1    3.20    1.30
  11  -9  -1    2.50    1.20
  11  -9  -1    1.80    1.00
 -11   9   1    3.90    1.10
  11   9  -1    2.90    1.00
  11   9  -1    3.50    1.00
  11   9  -1    1.80    1.00
  11   9  -1    3.30    0.90
  10  -9  -1    0.80    0.90
  10  -9  -1   -0.70    0.90
 -10  -9   1    1.60    0.90
  10  -9  -1    0.90    0.90
  10   9  -1    0.70    0.70
  10   9  -1    1.00    0.80
  10   9  -1    2.00    0.80
  10   9  -1   -0.10    0.60
 -10   9   1    0.50    0.70
  10   9  -1    1.60    0.70
   9  -9  -1    4.60    1.30
   9  -9  -1    3.70    0.80
  -9  -9   1    4.60    1.10
   9  -9  -1    3.30    1.00
   9  -9  -1    4.70    1.00
   9   9  -1    2.90    0.90
   9   9  -1    4.50    0.90
  -9   9   1    4.50    1.00
   9   9  -1    4.40    0.90
   9   9  -1    4.60    0.90
   9   9  -1    3.30    0.80
   9   9  -1    4.60    1.00
   8  -9  -1   57.69    2.60
   8  -9  -1   54.19    2.30
   8  -9  -1   56.59    2.80
   8  -9  -1   59.19    3.00
  -8  -9   1   61.29    2.90
   8   9  -1   57.39    2.60
  -8   9   1   56.69    2.70
   8   9  -1   57.19    2.40
  -8   9   1   55.79    2.70
   8   9  -1   60.99    2.60
   8   9  -1   60.49    2.60
   8   9  -1   57.29    2.60
   8   9  -1   58.19    2.60
   7  -9  -1   31.60    1.50
   7  -9  -1   37.00    2.30
   7  -9  -1   33.00    2.00
   7  -9  -1   30.90    1.80
  -7  -9   1   29.10    1.90
  -7   9   1   34.70    1.90
   7   9  -1   33.10    1.60
   7   9  -1   28.30    1.60
  -7   9   1   35.00    2.00
   7   9  -1   31.90    1.80
   7   9  -1   31.00    1.70
   7   9  -1   29.50    1.80
   7   9  -1   32.40    1.80
   6  -9  -1   47.70    1.80
   6  -9  -1   47.30    2.50
   6  -9  -1   45.90    2.30
   6  -9  -1   46.40    2.10
  -6  -9   1   49.00    2.30
   6   9  -1   47.20    2.00
   6   9  -1   47.70    2.00
   6   9  -1   50.19    2.20
   6   9  -1   47.10    2.10
  -6   9   1   43.80    2.20
  -6   9   1   44.50    2.20
  -6   9   1   54.09    3.10
   5  -9  -1   23.60    1.60
  -5  -9   1   24.90    1.50
   5  -9  -1   24.30    1.40
   5  -9  -1   23.40    1.70
   5  -9  -1   23.20    1.10
   5   9  -1   23.90    1.40
   5   9  -1   27.80    1.30
   5   9  -1   23.90    1.20
  -5   9   1   27.20    1.60
   5   9  -1   23.90    0.90
   5   9  -1   24.80    0.90
  -5   9   1   22.80    1.40
  -5   9   1   25.90    1.50
   4  -9  -1    7.50    0.60
   4  -9  -1    8.20    0.80
  -4  -9   1    9.90    1.10
   4  -9  -1    8.50    1.00
   4  -9  -1    7.70    1.00
   4   9  -1    8.10    0.70
   4   9  -1    9.80    0.60
   4   9  -1    8.70    0.70
  -4   9   1    8.60    1.00
  -4   9   1    8.50    0.90
   4   9  -1    8.20    0.60
  -4   9   1    9.90    0.90
   4   9  -1    9.40    0.90
   3  -9  -1   60.49    1.70
   3  -9  -1   56.09    2.40
   3  -9  -1   58.09    2.20
  -3  -9   1   63.49    2.40
   3  -9  -1   60.49    2.60
  -3   9   1   59.09    2.40
   3   9  -1   61.69    2.40
  -3   9   1   64.59    2.20
   3   9  -1   63.49    2.20
   3   9  -1   60.09    2.00
   3   9  -1   61.39    2.00
   3   9  -1   63.19    2.00
  -3   9   1   60.59    2.50
  -2  -9   1    0.10    0.40
   2  -9  -1    0.90    0.40
  -2  -9   1    0.10    0.30
   2  -9  -1    1.30    0.60
   2  -9  -1    0.20    0.50
  -2   9   1    0.80    0.40
  -2   9   1    0.40    0.40
   2   9  -1    0.70    0.30
   2   9  -1    0.50    0.20
   2   9  -1    0.80    0.30
  -2   9   1    0.40    0.40
   2   9  -1    0.20    0.40
   2   9  -1    0.00    0.30
   1  -9  -1    1.40    0.60
  -1  -9   1    2.60    0.50
   1  -9  -1    3.10    0.60
  -1  -9   1    3.20    0.60
   1  -9  -1    3.70    0.50
   1  -9  -1    3.50    0.60
  -1   9   1    2.60    0.50
  -1   9   1    3.00    0.40
   1   9  -1    3.10    0.50
  -1   9   1    2.60    0.60
   1   9  -1    2.60    0.50
  -1   9   1    2.90    0.60
   1   9  -1    2.30    0.40
   1   9  -1    2.70    0.60
   0  -9  -1   17.80    1.20
   0  -9   1   17.30    1.10
   0  -9  -1   18.70    1.00
   0  -9   1   19.90    0.80
   0  -9   1   17.40    1.20
   0  -9   1   17.40    1.20
   0  -9  -1   17.00    1.10
   0   9   1   19.10    0.90
   0   9  -1   19.60    1.10
   0   9   1   16.70    1.10
   0   9   1   21.10    1.10
   0   9  -1   18.10    1.10
   0   9  -1   19.90    1.00
   0   9   1   18.80    1.10
   0   9  -1   19.60    1.10
   1  -9   1    9.50    0.90
   1  -9   1   10.50    0.60
   1  -9   1   11.10    1.00
  -1  -9  -1   10.30    1.00
  -1  -9  -1    9.70    0.80
   1   9   1   10.30    0.60
   1   9   1    9.80    0.90
  -1   9  -1   12.20    0.90
  -1   9  -1    9.70    0.90
  -1   9  -1    9.90    0.90
   1   9   1   11.20    0.80
  -1   9  -1   12.00    0.80
   2  -9   1   41.30    1.50
   2  -9   1   40.60    1.90
  -2  -9  -1   39.90    1.60
   2  -9   1   39.60    1.90
  -2  -9  -1   40.80    1.90
  -2   9  -1   44.20    1.70
  -2   9  -1   42.00    1.90
   2   9   1   45.40    1.80
   2   9   1   41.30    1.50
  -2   9  -1   42.10    1.90
   2   9   1   42.10    1.60
   3  -9   1   71.19    2.80
  -3  -9  -1   63.09    2.70
   3  -9   1   68.89    2.30
   3  -9   1   71.59    2.70
  -3   9  -1   66.79    2.40
   3   9   1   66.19    2.40
  -3   9  -1   69.19    2.60
  -3   9  -1   70.39    2.60
   3   9   1   61.09    2.10
   3   9   1   60.99    2.10
  -4  -9  -1   73.99    2.90
   4  -9   1   69.69    2.90
   4  -9   1   63.39    2.80
   4  -9   1   70.69    2.50
   4   9   1   68.79    2.50
   4   9   1   67.09    2.30
   4   9   1   71.99    2.80
  -4   9  -1   68.09    2.70
  -4   9  -1   71.09    2.80
  -4   9  -1   66.19    2.60
   4   9   1   70.09    2.20
   5  -9   1   27.10    1.50
   5  -9   1   27.00    1.70
  -5  -9  -1   24.20    1.60
   5  -9   1   26.40    1.80
   5   9   1   25.20    1.20
  -5   9  -1   29.60    1.60
   5   9   1   26.30    1.40
  -5   9  -1   23.80    1.50
   5   9   1   23.10    1.60
   5   9   1   25.40    1.00
  -6  -9  -1   41.80    2.20
   6  -9   1   39.90    2.30
   6  -9   1   33.50    2.00
   6  -9   1   40.50    1.90
  -6   9  -1   40.40    2.00
   6   9   1   44.70    2.20
   6   9   1   38.20    1.70
  -6   9  -1   40.20    2.10
   6   9   1   38.30    1.80
   7  -9   1  108.79    4.30
  -7  -9  -1  117.19    4.50
   7  -9   1  117.09    4.00
   7  -9   1  110.69    4.40
   7   9   1  113.19    3.70
   7   9   1  114.69    3.70
  -7   9  -1  109.49    4.00
   7   9   1  108.29    4.10
   7   9   1  107.69    4.10
  -7   9  -1  111.09    4.10
   8  -9   1   34.50    2.00
   8  -9   1   36.40    2.40
   8  -9   1   32.00    2.20
  -8  -9  -1   41.30    2.40
   8   9   1   37.10    1.80
  -8   9  -1   34.20    2.10
   8   9   1   34.60    1.80
   8   9   1   35.00    2.00
  -8   9  -1   33.60    2.00
   8   9   1   34.80    2.10
   8   9   1   33.10    2.10
   9  -9   1    7.60    1.40
   9  -9   1    9.50    1.10
   9  -9   1    7.40    1.20
   9  -9   1    8.10    1.50
  -9  -9  -1    7.00    1.30
   9   9   1    6.80    1.20
   9   9   1    7.70    1.10
   9   9   1    7.90    1.00
  -9   9  -1    9.00    1.20
   9   9   1    8.40    1.20
  -9   9  -1    7.60    1.30
   9   9   1    8.00    1.30
  10  -9   1    5.00    1.20
  10  -9   1    6.60    1.40
 -10  -9  -1    5.30    1.30
  10  -9   1    4.90    1.10
  10   9   1    6.60    1.20
  10   9   1    7.10    1.30
  10   9   1    6.10    1.00
  10   9   1    7.30    1.20
  10   9   1    6.80    1.30
 -10   9  -1    7.20    1.30
 -10   9  -1    7.60    1.20
  11  -9   1    4.30    1.20
 -11  -9  -1    3.10    1.10
  11  -9   1    5.60    1.40
  11  -9   1    3.50    1.30
 -11   9  -1    5.40    1.20
  11   9   1    2.90    1.00
  11   9   1    5.70    1.30
  11   9   1    6.20    1.20
  12  -9   1    1.30    1.10
  12  -9   1    2.80    1.40
  12  -9   1    2.00    1.10
  12   9   1    3.30    1.20
  12   9   1    1.00    1.00
  12   9   1    2.00    1.00
  12 -10  -1    5.70    1.60
  12 -10  -1    5.60    1.40
  12 -10  -1    5.80    1.30
 -12  10   1    7.70    1.50
  12  10  -1    5.70    1.30
  12  10  -1    6.10    1.30
  12  10  -1    4.80    1.10
  11 -10  -1    0.70    1.20
 -11 -10   1    1.50    1.00
  11 -10  -1    2.90    1.10
  11 -10  -1    2.60    1.10
 -11  10   1    1.20    0.90
  11  10  -1    1.80    0.90
  11  10  -1    2.40    1.00
  11  10  -1    3.50    1.00
 -10 -10   1    9.30    1.50
  10 -10  -1   11.30    1.50
  10 -10  -1   10.30    1.50
  10 -10  -1   13.30    1.80
  10  10  -1   12.20    1.40
 -10  10   1   13.20    1.60
  10  10  -1   10.30    1.40
  10  10  -1   13.00    1.90
  10  10  -1   12.50    1.40
  10  10  -1   11.70    1.50
  10  10  -1   14.90    1.50
   9 -10  -1    3.10    0.90
  -9 -10   1    2.60    0.90
   9 -10  -1    1.50    1.00
   9 -10  -1    0.10    0.90
   9  10  -1    2.50    0.80
   9  10  -1    1.80    0.70
   9  10  -1    1.80    0.80
   9  10  -1    2.10    0.80
   9  10  -1    3.40    0.90
   9  10  -1    2.20    0.80
  -9  10   1    1.50    0.90
  -8 -10   1    6.70    1.20
   8 -10  -1    6.50    1.30
   8 -10  -1    5.90    1.20
   8 -10  -1    4.70    1.00
   8  10  -1    5.30    0.90
   8  10  -1    5.60    1.00
  -8  10   1    7.10    1.20
   8  10  -1    6.20    1.00
   8  10  -1    5.70    0.90
   8  10  -1    6.20    1.00
  -8  10   1    6.20    1.10
   8  10  -1    5.40    0.90
   7 -10  -1    4.70    0.90
   7 -10  -1    3.00    0.90
  -7 -10   1    3.50    0.90
   7 -10  -1    4.60    1.10
   7  10  -1    4.70    0.90
   7  10  -1    3.20    0.80
   7  10  -1    3.50    0.80
   7  10  -1    4.10    0.80
   7  10  -1    4.40    0.80
   7  10  -1    6.30    0.90
  -7  10   1    4.30    1.00
  -7  10   1    4.30    0.90
   6 -10  -1  136.09    4.40
   6 -10  -1  122.69    4.60
   6 -10  -1  132.99    4.90
  -6 -10   1  130.09    4.60
  -6  10   1  133.69    4.70
   6  10  -1  140.89    4.50
   6  10  -1  129.89    4.20
  -6  10   1  133.29    4.50
   6  10  -1  131.49    4.30
   6  10  -1  142.59    4.50
   5 -10  -1   45.80    2.30
  -5 -10   1   40.70    2.10
   5 -10  -1   41.40    2.30
   5 -10  -1   42.10    2.00
   5  10  -1   44.00    1.80
  -5  10   1   46.10    2.20
   5  10  -1   41.50    1.50
  -5  10   1   42.70    2.00
   5  10  -1   45.30    2.00
  -5  10   1   43.00    2.20
   5  10  -1   42.80    1.80
   5  10  -1   42.20    1.50
  -4 -10   1   10.40    1.10
   4 -10  -1    6.00    1.00
   4 -10  -1    7.50    1.10
   4 -10  -1    9.20    0.90
   4  10  -1    6.50    0.90
   4  10  -1    8.20    0.80
   4  10  -1    7.50    0.60
   4  10  -1    7.60    0.70
  -4  10   1    5.80    0.80
  -4  10   1    8.50    1.10
  -4  10   1    7.00    0.90
   4  10  -1    7.50    0.60
  -3 -10   1   15.70    1.20
   3 -10  -1   12.40    1.20
   3 -10  -1   13.50    1.00
   3 -10  -1   14.60    1.30
   3  10  -1   14.90    0.90
   3  10  -1   16.60    0.90
   3  10  -1   14.80    1.10
   3  10  -1   13.60    0.90
   3  10  -1   14.50    0.80
  -3  10   1   17.40    1.30
  -3  10   1   14.90    1.00
  -3  10   1   13.70    1.20
  -2 -10   1   29.10    1.50
   2 -10  -1   25.50    1.50
   2 -10  -1   25.20    1.60
   2 -10  -1   26.20    1.30
   2  10  -1   24.10    1.20
  -2  10   1   25.80    1.50
  -2  10   1   24.90    1.20
  -2  10   1   25.80    1.50
   2  10  -1   25.90    1.20
   2  10  -1   25.10    0.90
   2  10  -1   27.50    1.20
   2  10  -1   25.70    1.40
  -1 -10   1   19.80    1.20
   1 -10  -1   19.70    1.30
   1 -10  -1   20.10    1.40
  -1 -10   1   19.30    1.30
   1 -10  -1   19.80    1.30
   1 -10  -1   22.00    1.10
   1  10  -1   19.40    1.10
  -1  10   1   20.40    1.00
  -1  10   1   19.80    1.30
   1  10  -1   20.00    1.10
  -1  10   1   20.00    1.20
   1  10  -1   21.00    1.20
   1  10  -1   19.80    1.10
   0 -10   1   69.99    2.70
   0 -10   1   71.39    2.70
   0 -10   1   74.89    2.70
   0 -10  -1   71.29    2.60
   0 -10   1   72.09    2.30
   0 -10  -1   71.79    2.40
   0 -10  -1   66.59    2.80
   0  10   1   74.69    2.70
   0  10  -1   72.09    2.60
   0  10  -1   68.19    2.40
   0  10   1   73.69    2.60
   0  10   1   68.69    2.30
   0  10  -1   72.39    2.60
   0  10   1   68.89    2.50
   0  10  -1   68.89    2.60
   1 -10   1   10.50    1.00
  -1 -10  -1    9.40    0.90
  -1 -10  -1   11.20    1.00
   1 -10   1   10.40    1.10
   1 -10   1   10.50    0.90
   1 -10   1   10.70    0.70
  -1  10  -1   11.20    1.00
   1  10   1   10.50    0.80
   1  10   1   10.50    0.70
  -1  10  -1   10.80    0.80
   1  10   1   11.20    1.00
   1  10   1   10.30    0.80
  -1  10  -1   11.60    1.00
  -2 -10  -1    2.40    0.70
   2 -10   1    2.00    0.70
   2 -10   1    3.80    0.80
   2 -10   1    4.00    0.50
   2  10   1    4.30    0.50
  -2  10  -1    4.10    0.60
   2  10   1    3.60    0.50
  -2  10  -1    3.70    0.70
   2  10   1    4.90    0.60
  -2  10  -1    3.90    0.70
   2  10   1    4.50    0.40
   2  10   1    3.60    0.70
   3 -10   1   24.10    1.60
  -3 -10  -1   19.80    1.50
   3 -10   1   20.90    1.40
   3 -10   1   24.30    1.20
   3  10   1   23.10    1.30
   3  10   1   22.70    1.00
   3  10   1   22.80    1.00
  -3  10  -1   25.40    1.40
  -3  10  -1   24.00    1.50
  -3  10  -1   22.50    1.50
   3  10   1   20.30    1.10
   4 -10   1  225.58    6.40
  -4 -10  -1  231.18    7.00
   4 -10   1  215.48    6.80
   4 -10   1  206.98    6.90
  -4  10  -1  239.38    7.00
   4  10   1  228.68    6.70
   4  10   1  217.58    6.20
  -4  10  -1  228.98    6.80
   4  10   1  209.28    6.30
  -4  10  -1  229.58    6.90
   4  10   1  231.08    7.00
   4  10   1  225.08    6.40
   5 -10   1   61.79    2.80
  -5 -10  -1   60.29    2.80
   5 -10   1   62.09    2.40
   5 -10   1   61.79    2.90
   5  10   1   60.09    1.90
  -5  10  -1   61.19    2.50
   5  10   1   63.39    2.20
   5  10   1   58.59    2.40
  -5  10  -1   61.49    2.60
   5  10   1   57.39    2.70
   6 -10   1   30.10    2.10
  -6 -10  -1   33.30    2.10
   6 -10   1   27.20    1.90
   6 -10   1   30.20    1.70
   6  10   1   29.50    1.60
   6  10   1   31.20    1.10
  -6  10  -1   32.60    1.90
   6  10   1   31.60    1.50
   6  10   1   30.10    1.90
  -6  10  -1   30.10    1.80
  -7 -10  -1    1.40    0.80
   7 -10   1    2.40    0.90
   7 -10   1    2.00    0.80
   7 -10   1    3.30    1.00
   7  10   1    1.80    0.60
   7  10   1    2.20    0.80
  -7  10  -1    1.80    0.70
  -7  10  -1    1.60    0.80
   7  10   1    1.80    0.60
   7  10   1    2.20    0.60
   7  10   1    1.30    0.80
  -8 -10  -1    7.80    1.30
   8 -10   1    6.70    1.10
   8 -10   1   10.80    1.60
   8 -10   1    8.60    1.40
  -8  10  -1   10.70    1.30
   8  10   1   11.30    1.30
  -8  10  -1    6.60    1.20
   8  10   1    8.90    1.10
   8  10   1    9.00    1.30
   8  10   1    9.00    1.20
   8  10   1    7.90    1.00
   8  10   1    8.80    1.00
   9 -10   1   39.00    2.30
  -9 -10  -1   39.70    2.60
   9 -10   1   40.90    2.60
   9 -10   1   40.70    2.80
   9  10   1   37.90    2.40
   9  10   1   38.10    2.40
  -9  10  -1   41.10    2.40
  -9  10  -1   38.70    2.30
   9  10   1   39.40    2.20
   9  10   1   37.90    2.30
  10 -10   1    1.50    1.20
  10 -10   1   -0.20    1.00
 -10 -10  -1    1.20    0.90
  10 -10   1    0.10    0.90
  10  10   1   -0.50    0.80
 -10  10  -1    0.10    0.80
  10  10   1    0.00    0.80
 -10  10  -1    1.00    0.80
  10  10   1    0.70    0.80
  10  10   1    0.40    0.70
  11 -10   1    1.80    1.30
 -11 -10  -1    3.50    1.20
  11 -10   1    4.00    1.30
  11 -10   1    1.80    1.10
  11  10   1    4.10    1.20
  11  10   1    2.40    1.00
  11  10   1    2.60    1.00
 -11  10  -1    3.70    1.10
  11 -11  -1    4.10    1.30
 -11 -11   1    3.90    1.30
  11 -11  -1    2.80    1.10
  11 -11  -1    3.50    1.40
 -11  11   1    6.20    1.40
  11  11  -1    3.10    1.10
  11  11  -1    4.10    1.10
  10 -11  -1    0.10    0.80
 -10 -11   1    1.80    1.00
  10 -11  -1    1.40    1.20
  10 -11  -1    1.10    1.00
  10  11  -1   -0.50    0.80
  10  11  -1    0.30    0.80
  10  11  -1    0.00    0.70
 -10  11   1    0.40    0.80
  10  11  -1    2.20    0.90
  10  11  -1    0.00    0.70
  10  11  -1    1.00    0.80
   9 -11  -1   -0.10    0.90
   9 -11  -1    1.00    1.10
   9 -11  -1    2.80    0.90
  -9 -11   1    2.70    1.00
  -9  11   1    2.50    1.00
   9  11  -1    1.30    0.70
   9  11  -1    1.80    0.80
   9  11  -1    2.20    0.90
   9  11  -1    2.80    0.80
   9  11  -1    1.30    0.70
   9  11  -1    2.10    0.80
  -9  11   1    2.40    1.00
  -8 -11   1   28.30    2.00
   8 -11  -1   29.50    2.30
   8 -11  -1   24.00    2.00
   8 -11  -1   28.10    1.90
   8  11  -1   29.50    1.80
  -8  11   1   28.60    2.00
   8  11  -1   28.60    1.70
   8  11  -1   29.70    1.70
   8  11  -1   28.30    1.90
   8  11  -1   28.00    1.80
   8  11  -1   32.30    2.00
  -8  11   1   32.00    2.10
   7 -11  -1    6.10    1.20
   7 -11  -1    8.20    1.10
  -7 -11   1    7.70    1.20
   7 -11  -1    8.80    1.40
  -7  11   1    8.00    1.10
   7  11  -1    8.20    1.10
   7  11  -1    7.10    0.90
   7  11  -1    8.20    1.10
  -7  11   1    9.30    1.30
   7  11  -1    7.20    0.90
   7  11  -1    6.80    1.10
   6 -11  -1   14.40    1.70
  -6 -11   1   14.30    1.50
   6 -11  -1   15.80    1.60
   6 -11  -1   14.60    1.30
   6  11  -1   14.30    0.70
   6  11  -1   13.80    1.30
   6  11  -1   14.10    1.10
   6  11  -1   15.70    1.10
   6  11  -1   11.00    1.10
  -6  11   1   14.00    1.50
  -6  11   1   14.00    1.30
   5 -11  -1   17.70    1.60
   5 -11  -1   18.60    1.80
  -5 -11   1   16.30    1.40
   5 -11  -1   18.90    1.30
   5  11  -1   16.50    1.10
  -5  11   1   17.70    1.50
  -5  11   1   16.80    1.30
  -5  11   1   18.40    1.50
   5  11  -1   17.70    1.10
   5  11  -1   17.80    1.40
   5  11  -1   17.90    0.90
   5  11  -1   17.50    0.90
   4 -11  -1   36.60    2.10
   4 -11  -1   37.70    1.70
  -4 -11   1   36.30    2.00
   4 -11  -1   37.20    2.20
  -4  11   1   37.10    2.00
  -4  11   1   30.70    1.60
   4  11  -1   36.30    1.50
  -4  11   1   31.00    1.80
   4  11  -1   31.90    1.80
   4  11  -1   32.60    1.40
   4  11  -1   34.80    1.40
   3 -11  -1   14.70    1.40
   3 -11  -1   15.70    1.50
  -3 -11   1   12.00    1.20
   3 -11  -1   15.30    1.10
   3  11  -1   15.30    1.20
   3  11  -1   17.10    1.00
   3  11  -1   14.70    0.90
   3  11  -1   14.60    1.00
  -3  11   1   17.20    1.40
  -3  11   1   15.00    1.20
  -3  11   1   16.20    1.10
  -2 -11   1   49.99    2.20
   2 -11  -1   46.30    2.20
   2 -11  -1   50.79    2.00
   2 -11  -1   47.10    2.30
  -2  11   1   49.99    1.90
  -2  11   1   46.40    2.10
  -2  11   1   44.90    2.10
   2  11  -1   47.20    1.90
   2  11  -1   52.89    2.20
   2  11  -1   47.50    1.90
   2  11  -1   46.40    2.10
   1 -11  -1    6.70    1.00
  -1 -11   1    8.90    1.00
   1 -11  -1    7.40    1.00
   1 -11  -1    8.30    0.80
   1 -11  -1    8.40    1.00
  -1  11   1    8.50    0.90
  -1  11   1    8.50    1.00
   1  11  -1    8.80    0.80
  -1  11   1    8.50    0.70
   1  11  -1    8.50    0.90
   1  11  -1    7.70    1.00
   0 -11   1  110.59    3.80
   0 -11  -1  108.79    3.50
   0 -11   1  113.59    3.30
   0 -11  -1   99.29    3.90
   0 -11  -1  113.09    3.80
   0 -11   1  108.49    3.80
   0 -11   1  108.59    3.70
   0  11  -1  105.49    3.50
   0  11   1  105.99    3.30
   0  11   1  108.29    3.70
   0  11   1  111.19    3.70
   0  11  -1  108.09    3.70
   0  11  -1  112.59    3.70
   1 -11   1   78.99    3.10
   1 -11   1   77.19    3.10
   1 -11   1   79.19    3.10
  -1 -11  -1   81.19    3.20
   1 -11   1   83.59    2.60
  -1  11  -1   79.39    2.70
  -1  11  -1   76.29    2.90
   1  11   1   81.79    2.50
  -1  11  -1   76.39    3.00
   1  11   1   75.39    2.90
   1  11   1   72.29    2.70
  -2 -11  -1   21.80    1.60
   2 -11   1   21.20    1.50
   2 -11   1   22.50    1.10
  -2  11  -1   22.10    1.50
   2  11   1   21.30    1.00
  -2  11  -1   22.60    1.30
  -2  11  -1   19.60    1.40
   2  11   1   23.60    1.20
   2  11   1   20.50    1.40
   2  11   1   24.10    1.40
   3 -11   1   53.89    2.50
   3 -11   1   51.99    1.90
   3 -11   1   50.59    2.40
  -3 -11  -1   48.60    2.50
   3  11   1   56.49    2.30
  -3  11  -1   60.69    2.30
   3  11   1   56.39    2.10
   3  11   1   56.89    2.00
  -3  11  -1   52.69    2.40
   3  11   1   54.29    2.00
  -4 -11  -1   10.40    1.30
   4 -11   1    7.30    1.10
   4 -11   1   12.30    1.40
   4 -11   1   12.50    1.00
   4  11   1   10.80    0.80
   4  11   1   12.00    1.30
  -4  11  -1    8.50    1.10
   4  11   1   12.10    0.80
  -4  11  -1   14.00    1.30
   4  11   1   12.40    1.10
   4  11   1   11.00    0.80
   5 -11   1    2.30    0.90
  -5 -11  -1    4.70    1.00
   5 -11   1    3.60    0.70
   5 -11   1    6.00    1.20
   5  11   1    4.10    0.50
   5  11   1    4.20    0.60
  -5  11  -1    5.20    1.00
   5  11   1    5.00    0.80
  -5  11  -1    4.00    0.80
   5  11   1    4.20    0.50
   5  11   1    4.80    0.60
   5  11   1    4.20    0.90
  -5  11  -1    5.90    1.00
  -6 -11  -1   61.49    3.00
   6 -11   1   62.09    2.50
   6 -11   1   59.19    2.90
   6 -11   1   64.19    3.10
   6  11   1   56.79    2.50
   6  11   1   62.99    1.90
  -6  11  -1   62.89    2.80
   6  11   1   61.79    2.90
   6  11   1   60.79    1.90
  -6  11  -1   63.09    2.80
   6  11   1   60.09    2.40
   6  11   1   58.79    2.50
   7 -11   1   16.60    1.40
   7 -11   1   16.90    1.70
   7 -11   1   17.30    1.90
  -7 -11  -1   14.80    1.70
  -7  11  -1   18.40    1.60
   7  11   1   16.00    1.60
   7  11   1   17.00    1.30
   7  11   1   14.60    1.30
  -7  11  -1   16.60    1.60
   7  11   1   14.50    1.60
   8 -11   1    0.50    1.00
  -8 -11  -1   -0.60    0.60
   8 -11   1   -1.10    0.70
   8 -11   1    0.10    0.70
   8  11   1   -0.60    0.60
  -8  11  -1    0.80    0.80
   8  11   1   -0.10    0.50
   8  11   1   -0.20    0.60
   8  11   1    0.60    0.70
  -8  11  -1    0.90    0.80
   8  11   1   -0.10    0.90
   9 -11   1    2.70    1.20
  -9 -11  -1    3.80    1.10
   9 -11   1    4.90    1.40
   9 -11   1    5.60    1.10
   9  11   1    5.50    1.10
  -9  11  -1    3.90    1.10
   9  11   1    3.90    1.00
   9  11   1    4.90    1.10
  -9  11  -1    3.30    1.10
   9  11   1    4.60    1.10
  10 -11   1   12.70    1.60
  10 -11   1   18.90    2.30
  10 -11   1    9.40    1.60
 -10 -11  -1   14.50    1.90
  10  11   1   14.70    1.90
 -10  11  -1   13.40    1.70
  10  11   1   12.10    1.50
  10  11   1   14.60    1.70
 -10  11  -1   12.20    1.60
  10  11   1   11.10    1.60
  11 -11   1    5.20    1.50
 -11 -11  -1    4.80    1.40
  11 -11   1    4.40    1.50
  11 -11   1    5.60    1.30
  11  11   1    4.00    1.20
  11  11   1    6.30    1.40
  11  11   1    4.10    1.10
 -11  11  -1    8.30    1.50
 -11 -12   1    6.50    1.50
  11 -12  -1    6.70    1.40
  11 -12  -1    5.80    1.60
  11 -12  -1    7.10    1.50
 -11  12   1    3.30    1.10
  10 -12  -1   -1.60    0.90
  10 -12  -1   -0.30    0.90
  10 -12  -1   -0.10    1.00
 -10 -12   1   -0.10    0.80
 -10  12   1    1.20    0.90
  10  12  -1    0.10    0.70
   9 -12  -1   17.00    1.90
   9 -12  -1   22.30    2.30
   9 -12  -1   21.10    1.80
  -9 -12   1   15.80    1.90
   9  12  -1   15.00    1.70
  -9  12   1   17.60    1.90
   9  12  -1   19.80    1.60
   9  12  -1   21.70    2.00
  -9  12   1   17.10    1.80
   8 -12  -1    0.10    0.90
   8 -12  -1    0.90    0.80
   8 -12  -1    1.90    1.10
  -8 -12   1    0.00    0.70
  -8  12   1    2.40    0.90
   8  12  -1    0.90    0.70
   8  12  -1    1.70    0.80
  -8  12   1    0.20    0.80
   8  12  -1    1.00    0.80
   8  12  -1    1.90    0.70
   8  12  -1    1.30    1.00
   7 -12  -1    2.10    1.00
  -7 -12   1    4.40    1.00
   7 -12  -1    4.90    1.00
   7 -12  -1    4.50    1.30
   7  12  -1    2.80    0.80
  -7  12   1    4.30    0.90
   7  12  -1    3.00    0.80
   7  12  -1    4.80    1.00
   7  12  -1    4.90    0.80
  -7  12   1    4.20    1.00
   6 -12  -1   25.60    2.10
   6 -12  -1   21.20    1.80
  -6 -12   1   23.40    1.80
   6 -12  -1   23.60    1.60
   6  12  -1   24.50    1.00
  -6  12   1   25.90    1.80
   6  12  -1   22.60    1.40
   6  12  -1   23.30    1.00
   6  12  -1   21.90    1.60
  -6  12   1   25.70    1.70
   5 -12  -1   15.50    1.30
   5 -12  -1   14.10    1.60
   5 -12  -1   16.10    1.70
  -5 -12   1   13.60    1.50
   5  12  -1   12.90    1.30
  -5  12   1   15.00    1.40
  -5  12   1   17.50    1.60
   5  12  -1   14.20    1.10
   5  12  -1   15.50    0.90
  -5  12   1   15.90    1.30
   5  12  -1   14.50    0.90
   4 -12  -1   26.20    1.50
   4 -12  -1   26.80    1.90
  -4 -12   1   25.10    1.60
   4 -12  -1   26.50    1.80
  -4  12   1   25.10    1.50
   4  12  -1   26.40    1.40
  -4  12   1   29.50    1.80
  -4  12   1   27.00    1.80
   4  12  -1   24.20    1.60
   4  12  -1   26.40    1.30
   3 -12  -1   12.60    1.40
   3 -12  -1   10.90    1.30
  -3 -12   1   11.60    1.30
   3 -12  -1   12.70    1.10
   3  12  -1   13.10    1.00
   3  12  -1   12.30    1.20
   3  12  -1   13.80    1.00
  -3  12   1   12.10    1.20
  -3  12   1   11.30    1.20
  -3  12   1   14.00    1.10
  -2 -12   1   16.50    1.30
   2 -12  -1   16.90    1.10
   2 -12  -1   18.20    1.50
   2 -12  -1   17.10    1.50
   2 -12  -1   11.40    1.30
  -2  12   1   17.10    1.40
   2  12  -1   18.80    1.10
  -2  12   1   18.30    1.40
  -2  12   1   18.60    1.10
   2  12  -1   15.60    1.30
   1 -12  -1   25.60    1.80
   1 -12  -1   29.50    1.70
   1 -12  -1   28.60    1.40
   1 -12  -1   27.80    1.80
  -1 -12   1   28.10    1.70
   1  12  -1   29.00    1.60
  -1  12   1   30.00    1.70
  -1  12   1   30.70    1.70
   1  12  -1   28.50    1.40
  -1  12   1   28.50    1.30
   0 -12   1   94.59    3.00
   0 -12  -1   84.09    2.90
   0 -12   1   92.09    3.40
   0 -12  -1   84.29    3.40
   0 -12   1   80.49    3.30
   0  12   1   85.99    3.10
   0  12  -1   84.59    2.90
   0  12  -1   78.59    3.20
   0  12   1   87.69    3.20
   0  12   1   85.09    2.70
   1 -12   1   93.59    3.00
   1 -12   1   92.89    3.50
   1 -12   1   91.09    3.50
  -1 -12  -1   91.09    3.60
   1 -12   1   93.49    3.50
   1  12   1   90.19    3.20
  -1  12  -1   90.79    3.10
   1  12   1   87.49    3.30
  -1  12  -1   88.19    3.40
   1  12   1   91.29    2.90
   2 -12   1   32.60    1.90
   2 -12   1   36.10    2.00
   2 -12   1   33.60    1.50
  -2 -12  -1   36.10    2.00
   2  12   1   31.50    1.60
  -2  12  -1   38.00    1.70
   2  12   1   33.40    1.80
   2  12   1   35.20    1.40
  -2  12  -1   35.90    1.90
  -3 -12  -1    6.00    1.10
   3 -12   1    6.90    0.70
   3 -12   1    6.90    1.00
   3 -12   1    8.20    1.20
   3  12   1    7.50    1.00
   3  12   1    6.60    0.70
  -3  12  -1    6.60    1.00
  -3  12  -1    8.60    1.00
   3  12   1    7.00    1.00
   4 -12   1   -0.10    0.80
   4 -12   1    1.40    0.60
   4 -12   1    0.60    0.70
  -4 -12  -1    0.70    0.60
  -4  12  -1    0.60    0.60
  -4  12  -1    0.90    0.60
   4  12   1    1.20    0.60
   4  12   1    0.60    0.40
  -4  12  -1    1.60    0.70
  -5 -12  -1   20.70    1.70
   5 -12   1   19.10    1.70
   5 -12   1   20.50    1.30
   5 -12   1   21.00    1.80
   5  12   1   20.20    1.00
  -5  12  -1   19.80    1.60
  -5  12  -1   20.10    1.50
   5  12   1   19.50    1.60
  -5  12  -1   20.40    1.60
   5  12   1   17.40    1.30
   5  12   1   20.80    1.00
   6 -12   1   20.50    1.90
   6 -12   1   20.90    1.50
  -6 -12  -1   22.50    1.90
   6 -12   1   21.80    1.90
  -6  12  -1   21.60    1.70
   6  12   1   22.30    1.80
   6  12   1   21.50    1.00
   6  12   1   20.00    1.50
  -6  12  -1   23.10    1.70
   6  12   1   20.70    0.90
   7 -12   1   22.30    2.00
   7 -12   1   21.00    1.60
  -7 -12  -1   23.80    1.90
   7 -12   1   26.60    2.40
   7  12   1   20.60    1.90
  -7  12  -1   23.60    1.80
  -7  12  -1   24.00    1.80
   7  12   1   22.60    1.80
   7  12   1   24.30    1.60
  -8 -12  -1    3.00    1.10
   8 -12   1    1.20    1.00
   8 -12   1    2.00    1.20
   8 -12   1    1.60    0.90
   8  12   1    2.70    0.90
  -8  12  -1    1.00    0.80
  -8  12  -1    2.00    0.90
   8  12   1    2.30    0.90
   8  12   1    0.40    0.70
   9 -12   1    0.60    0.80
  -9 -12  -1    1.20    0.90
   9 -12   1    0.40    1.00
   9 -12   1   -0.80    1.00
   9  12   1    1.10    0.80
   9  12   1    1.00    0.80
  -9  12  -1    2.00    1.00
  -9  12  -1    1.90    0.90
   9  12   1    1.20    0.80
 -10 -12  -1    0.70    1.00
  10 -12   1    4.20    1.50
  10 -12   1    2.10    1.20
  10  12   1    2.70    1.00
  10  12   1    2.90    1.10
 -10  12  -1    3.40    1.20
 -10  12  -1    3.40    1.10
  10  12   1    2.10    0.90
 -10 -13   1    1.40    1.00
  10 -13  -1    2.30    1.20
  10 -13  -1    1.30    1.30
  10 -13  -1    1.00    1.00
 -10  13   1    3.80    1.20
  10  13  -1    2.80    1.00
  -9 -13   1    3.60    1.10
   9 -13  -1    2.00    1.20
   9 -13  -1    4.40    1.30
   9 -13  -1    2.50    1.00
   9  13  -1    1.30    0.80
  -9  13   1    2.80    1.10
   9  13  -1    3.40    1.00
   9  13  -1    1.30    0.80
  -9  13   1    2.80    1.10
   8 -13  -1   11.80    1.80
  -8 -13   1   12.50    1.70
   8 -13  -1    9.80    1.50
   8 -13  -1   13.50    1.50
  -8  13   1    9.70    1.40
   8  13  -1    9.30    1.30
   8  13  -1   12.10    1.50
   8  13  -1   12.20    1.40
  -8  13   1   10.60    1.40
   7 -13  -1    7.60    1.10
   7 -13  -1    7.90    1.50
  -7 -13   1    8.50    1.40
   7 -13  -1    6.80    1.30
   7  13  -1    7.10    1.20
  -7  13   1    8.70    1.20
   7  13  -1    6.30    1.10
  -7  13   1    7.10    1.30
   6 -13  -1    8.00    1.10
   6 -13  -1    6.10    1.30
  -6 -13   1    6.40    1.20
   6 -13  -1    7.00    1.20
   6  13  -1    6.80    1.10
  -6  13   1    8.40    1.30
   6  13  -1    6.00    0.60
  -6  13   1    6.80    1.10
   6  13  -1    5.50    1.00
   5 -13  -1   10.00    1.10
   5 -13  -1    6.60    1.10
  -5 -13   1    9.40    1.30
   5 -13  -1    7.50    1.40
  -5  13   1    8.50    1.20
  -5  13   1    6.90    1.10
   5  13  -1    7.60    0.70
   5  13  -1    8.00    0.90
   5  13  -1    6.50    1.10
  -5  13   1    6.80    1.00
   4 -13  -1    4.80    0.90
   4 -13  -1    5.40    0.80
   4 -13  -1    4.20    1.10
  -4 -13   1    4.80    1.00
   4  13  -1    2.70    0.60
  -4  13   1    5.50    0.90
   4  13  -1    3.50    0.90
  -4  13   1    4.50    1.00
   4  13  -1    4.10    0.60
  -4  13   1    5.60    1.00
   3 -13  -1    9.40    1.30
   3 -13  -1    9.40    1.30
   3 -13  -1   10.20    1.00
  -3 -13   1   10.00    1.30
   3  13  -1    6.60    0.80
  -3  13   1    9.10    1.20
   3  13  -1    8.70    1.20
  -3  13   1   10.30    1.30
  -3  13   1    8.50    1.00
   3  13  -1    9.80    0.90
   2 -13  -1   10.10    1.30
   2 -13  -1    7.80    1.20
   2 -13  -1   10.90    1.00
   2 -13  -1   11.40    1.40
  -2 -13   1   11.00    1.30
  -2  13   1   10.40    0.90
   2  13  -1    8.50    1.10
  -2  13   1    8.80    1.10
   2  13  -1   10.10    0.90
   2  13  -1   10.70    1.00
  -2  13   1    9.60    1.20
   1 -13  -1   20.20    1.20
  -1 -13   1   19.20    1.50
   1 -13  -1   20.50    1.60
   1  13  -1   23.00    1.30
   1  13  -1   20.50    1.50
   1  13  -1   21.20    1.40
  -1  13   1   20.70    1.20
  -1  13   1   22.10    1.50
  -1  13   1   20.50    1.50
   0 -13  -1   39.00    2.10
   0 -13   1   30.50    1.90
   0 -13  -1   33.00    1.60
   0  13   1   33.00    1.70
   0  13   1   32.80    1.80
   0  13   1   33.60    1.90
   0  13  -1   33.90    1.90
   0  13  -1   32.80    1.60
   1 -13   1   72.49    3.00
   1 -13   1   74.29    3.10
  -1 -13  -1   68.09    3.10
   1  13   1   72.09    2.80
   1  13   1   73.49    3.00
  -1  13  -1   71.29    3.00
  -1  13  -1   75.19    2.70
   2 -13   1    4.70    1.00
   2 -13   1    3.30    0.90
  -2 -13  -1    4.60    1.00
   2 -13   1    3.50    0.90
   2  13   1    3.80    0.70
   2  13   1    3.90    0.80
  -2  13  -1    3.60    0.90
  -2  13  -1    3.80    0.70
  -2  13  -1    2.20    0.70
   3 -13   1    2.80    1.00
   3 -13   1    3.10    0.90
  -3 -13  -1    4.30    1.00
   3  13   1    4.00    0.80
  -3  13  -1    4.80    1.00
   3  13   1    3.70    0.60
  -3  13  -1    3.50    0.80
  -3  13  -1    4.10    0.90
   4 -13   1    4.90    1.10
  -4 -13  -1    7.60    1.30
   4 -13   1    6.00    1.30
  -4  13  -1    5.00    0.90
  -4  13  -1    7.60    1.10
   4  13   1    6.80    1.00
   4  13   1    4.80    0.60
  -4  13  -1    5.90    1.10
   5 -13   1    2.60    1.00
   5 -13   1    1.40    1.00
  -5 -13  -1    2.10    0.90
   5  13   1    2.20    0.70
  -5  13  -1    3.10    0.80
   5  13   1    2.40    0.50
  -5  13  -1    1.30    0.80
   5  13   1    2.10    0.90
  -6 -13  -1    9.30    1.50
   6 -13   1    6.60    1.30
   6 -13   1    9.10    1.50
  -6  13  -1    8.20    1.20
   6  13   1    6.10    1.20
  -6  13  -1    8.80    1.30
   6  13   1   10.00    1.20
   6  13   1    7.40    0.60
   7 -13   1   13.10    1.90
   7 -13   1   10.90    1.60
  -7 -13  -1   12.10    1.70
  -7  13  -1   13.40    1.50
   7  13   1   13.20    1.60
  -7  13  -1   12.30    1.50
   7  13   1   11.70    1.30
   8 -13   1    5.20    1.30
   8 -13   1    6.60    1.50
  -8 -13  -1    8.10    1.60
   8  13   1    6.80    1.30
   8  13   1    5.00    1.10
  -8  13  -1    6.60    1.30
  -8  13  -1    5.30    1.20
   8  13   1    3.40    1.00
   9 -13   1    2.80    1.20
  -9 -13  -1    1.30    1.00
   9 -13   1    0.50    1.20
   9  13   1    1.90    0.90
   9  13   1    1.60    0.90
  -9  13  -1    2.40    1.10
  -9  13  -1    3.20    1.10
   9  13   1    0.20    0.80
  10 -13   1    4.70    1.50
 -10 -13  -1    2.20    1.20
  10 -13   1    1.30    1.20
 -10  13  -1    3.50    1.20
 -10  13  -1    4.40    1.20
  10  13   1    5.30    1.60
  10  13   1    2.00    1.00
  10  13   1    3.90    1.20
   9 -14  -1   -1.90    0.90
  -9 -14   1    1.80    0.90
   9 -14  -1    1.20    1.30
   9  14  -1    1.80    1.30
  -9  14   1    1.30    0.90
   9  14  -1    1.40    0.90
  -9  14   1    1.20    0.90
   8 -14  -1    3.50    1.20
   8 -14  -1    1.20    1.20
  -8 -14   1    4.00    1.20
  -8  14   1    4.20    1.20
   8  14  -1    2.70    0.90
  -8  14   1    2.60    1.00
   8  14  -1    3.20    1.00
   8  14  -1    1.60    0.90
   7 -14  -1    7.80    1.40
  -7 -14   1   10.10    1.50
   7 -14  -1    9.90    1.90
   7 -14  -1    9.60    1.70
   7  14  -1   12.70    1.60
   7  14  -1    8.20    1.30
  -7  14   1   11.60    1.40
  -7  14   1   10.20    1.60
  -6 -14   1   24.10    1.90
   6 -14  -1   24.40    2.00
   6 -14  -1   22.00    1.70
   6 -14  -1   21.00    2.10
  -6  14   1   23.20    1.80
   6  14  -1   25.50    1.20
  -6  14   1   22.60    1.90
   6  14  -1   25.10    1.80
   5 -14  -1    9.70    1.20
  -5 -14   1    9.70    1.40
   5 -14  -1   10.10    1.50
   5 -14  -1    9.60    1.40
   5  14  -1    8.30    0.80
   5  14  -1    7.80    1.20
  -5  14   1    8.80    1.80
  -5  14   1    8.20    1.30
  -5  14   1    8.10    1.10
  -4 -14   1    0.90    0.70
   4 -14  -1    0.50    0.60
   4 -14  -1    0.50    0.90
   4 -14  -1   -0.20    0.70
  -4  14   1    1.30    0.80
  -4  14   1    0.70    0.60
  -4  14   1    0.30    0.70
   4  14  -1    0.70    0.40
   4  14  -1    1.00    0.80
   3 -14  -1    0.60    0.80
   3 -14  -1    1.40    0.90
   3 -14  -1    1.10    0.60
  -3 -14   1    1.30    0.70
  -3  14   1    1.00    0.60
  -3  14   1    1.50    0.80
   3  14  -1    2.50    0.90
  -3  14   1    1.40    0.80
   3  14  -1    0.90    0.50
   3  14  -1    0.80    0.50
   2 -14  -1   22.50    1.80
  -2 -14   1   23.30    1.70
   2 -14  -1   20.90    1.80
   2 -14  -1   25.80    1.70
   2  14  -1   21.70    1.60
  -2  14   1   20.90    1.60
  -2  14   1   21.00    1.70
   2  14  -1   21.70    1.30
   2  14  -1   23.30    1.40
   1 -14  -1    9.20    1.30
  -1 -14   1    7.00    1.10
   1  14  -1    8.60    1.20
  -1  14   1   10.20    1.20
   1  14  -1    7.60    1.00
   1  14  -1    9.60    1.00
  -1  14   1    9.20    1.20
   0 -14  -1    4.90    1.10
   0 -14   1    4.30    0.90
   0  14  -1    6.20    0.90
   0  14   1    6.00    0.90
   0  14  -1    5.20    1.00
   0  14   1    5.70    1.00
   0  14  -1    6.80    0.90
  -1 -14  -1    2.00    0.80
   1 -14   1    2.30    0.80
   1 -14   1    0.70    0.70
  -1  14  -1    3.10    0.70
  -1  14  -1    1.60    0.80
   1  14   1    1.20    0.80
   1  14   1    1.20    0.60
  -1  14  -1    1.20    0.70
  -2 -14  -1    9.60    1.40
   2 -14   1    7.70    1.20
   2 -14   1   10.30    1.40
  -2  14  -1    8.10    1.20
  -2  14  -1    7.90    1.00
   2  14   1    9.10    1.00
  -2  14  -1    7.80    1.20
   2  14   1    7.60    1.10
   3 -14   1    5.20    1.20
  -3 -14  -1    6.70    1.20
   3 -14   1    4.20    1.00
  -3  14  -1    6.70    1.10
  -3  14  -1    6.00    0.90
   3  14   1    4.70    0.80
   3  14   1    5.90    1.00
  -3  14  -1    6.70    1.10
   4 -14   1    8.30    1.30
  -4 -14  -1    8.30    1.40
   4 -14   1   10.40    1.50
   4  14   1    8.40    0.90
  -4  14  -1    9.10    1.30
  -4  14  -1    9.00    1.10
   4  14   1    5.80    1.00
   4  14   1    6.80    1.20
  -4  14  -1    8.90    1.30
   5 -14   1    1.40    1.00
   5 -14   1    3.20    1.10
  -5 -14  -1    0.90    0.80
   5  14   1    1.20    0.70
  -5  14  -1    1.20    0.70
  -5  14  -1    1.10    0.80
   5  14   1    1.40    0.40
   5  14   1    1.20    0.80
   6 -14   1    1.50    1.00
  -6 -14  -1    4.10    1.10
   6 -14   1    2.50    1.20
   6  14   1    3.00    0.50
   6  14   1    2.50    1.00
   6  14   1    3.40    0.80
  -6  14  -1    2.90    0.90
  -6  14  -1    2.70    1.00
   7 -14   1    0.60    1.10
   7 -14   1    1.00    1.00
  -7 -14  -1    1.70    0.90
  -7  14  -1    4.40    1.10
  -7  14  -1    2.10    1.00
   7  14   1    2.20    1.00
   7  14   1    1.20    1.00
  -8 -14  -1    8.30    1.60
   8 -14   1    7.60    1.60
   8 -14   1    4.80    1.40
   8  14   1    4.50    1.10
   8  14   1    6.00    1.30
  -8  14  -1    8.00    1.40
  -8  14  -1    6.20    1.30
   9 -14   1   10.20    1.70
  -9 -14  -1   13.80    1.90
   9 -14   1   11.40    1.90
   9  14   1   13.40    1.80
  -9  14  -1   14.00    1.80
   9  14   1   11.60    1.70
  -9  14  -1   13.20    1.70
   9 -15  -1    6.90    1.60
   9 -15  -1    7.00    1.80
  -9  15   1    8.10    1.50
   9  15  -1    8.50    1.50
  -8 -15   1    9.30    1.60
   8 -15  -1    7.00    1.50
   8 -15  -1   12.60    2.00
   8  15  -1   13.10    1.80
   8  15  -1    8.90    1.30
  -8  15   1    7.80    1.50
   8  15  -1   10.20    1.50
  -8  15   1    8.40    1.50
  -7 -15   1    7.60    1.40
   7 -15  -1   12.90    1.90
   7 -15  -1   11.10    1.60
  -7  15   1    8.40    1.40
   7  15  -1   11.60    1.60
  -7  15   1    8.10    2.00
   7  15  -1    8.90    1.30
   6 -15  -1    2.60    1.10
   6 -15  -1    1.50    1.20
  -6 -15   1    2.40    1.00
   6  15  -1    1.00    0.40
   6  15  -1    1.10    0.80
  -6  15   1    1.80    0.90
  -5 -15   1    3.50    1.00
   5 -15  -1    5.30    1.40
   5 -15  -1    3.80    1.20
   5  15  -1    3.60    0.60
  -5  15   1    3.60    1.10
   5  15  -1    3.70    1.00
  -4 -15   1   34.80    2.20
   4 -15  -1   36.30    2.40
   4  15  -1   33.30    2.10
  -4  15   1   29.40    2.10
  -4  15   1   35.20    2.20
   4  15  -1   33.00    1.60
   3 -15  -1    5.30    1.20
   3 -15  -1    4.70    1.20
  -3 -15   1    5.30    1.10
   3  15  -1    7.40    1.20
   3  15  -1    6.80    0.90
  -3  15   1    6.20    1.20
  -3  15   1    6.40    1.10
   2 -15  -1    2.40    1.00
   2 -15  -1    3.60    1.00
  -2 -15   1    2.90    0.90
   2  15  -1    2.40    0.70
  -2  15   1    2.10    0.80
  -2  15   1    2.70    0.90
   2  15  -1    1.70    0.80
  -1 -15   1    2.90    0.90
   1 -15  -1    1.20    0.80
   1  15  -1    2.20    0.80
  -1  15   1    0.80    0.80
   1  15  -1    1.20    0.60
  -1  15   1    0.20    0.60
   0 -15  -1   26.50    2.00
   0 -15   1   24.20    1.80
   0  15   1   23.10    1.70
   0  15   1   23.70    1.60
   0  15  -1   24.10    1.60
   0  15  -1   22.80    1.80
   0  15  -1   23.40    1.50
   1 -15   1   -0.60    0.70
  -1 -15  -1    0.40    0.80
   1 -15   1    0.70    0.80
  -1  15  -1    0.60    0.80
  -1  15  -1    0.10    0.50
  -1  15  -1   -0.30    0.60
   1  15   1    0.90    0.70
   1  15   1   -0.40    0.50
   2 -15   1    7.60    1.20
  -2 -15  -1   10.00    1.40
   2 -15   1    6.60    1.20
  -2  15  -1    8.90    1.10
   2  15   1    8.60    1.20
  -2  15  -1    9.00    1.40
  -2  15  -1    8.40    1.20
   2  15   1    8.60    1.00
  -3 -15  -1   17.30    1.60
   3 -15   1   13.70    1.60
   3 -15   1   18.80    1.90
   3  15   1   17.80    1.60
  -3  15  -1   17.60    1.80
   3  15   1   15.50    1.20
  -3  15  -1   17.30    1.40
  -3  15  -1   16.70    1.70
  -4 -15  -1   11.00    1.60
   4 -15   1    9.00    1.40
   4  15   1   10.50    1.00
  -4  15  -1   11.40    1.50
   4  15   1   11.30    1.30
  -4  15  -1   11.50    1.50
  -4  15  -1    8.40    1.20
   4  15   1    9.50    1.40
   5 -15   1    1.30    1.00
   5 -15   1    0.00    0.90
  -5 -15  -1   -0.10    0.70
   5  15   1    1.20    0.70
  -5  15  -1    1.70    0.80
   5  15   1    0.60    0.40
   5  15   1    1.40    0.90
  -5  15  -1    1.60    0.90
   6 -15   1    7.90    1.60
   6 -15   1    6.20    1.40
  -6 -15  -1    8.50    1.50
  -6  15  -1    9.60    1.40
  -6  15  -1   11.70    1.60
   6  15   1    9.00    0.80
   6  15   1    5.40    1.20
   6  15   1    9.50    1.30
   7 -15   1    2.80    1.20
  -7 -15  -1    1.30    1.00
   7 -15   1    4.20    1.30
  -7  15  -1    2.30    1.00
  -7  15  -1    3.70    1.10
   7  15   1    2.60    1.10
  -8 -15  -1    4.80    1.30
   8 -15   1    1.80    1.40
   8 -15   1    1.50    1.20
   8  15   1    1.80    1.00
   8  15   1    2.20    1.10
  -8  15  -1    2.90    1.20
  -8  15  -1    3.30    1.10
   8 -16  -1    4.00    1.40
   8 -16  -1    5.60    1.70
  -8 -16   1    2.80    1.20
  -8  16   1    4.10    1.40
   8  16  -1    2.40    1.20
   8  16  -1    5.00    1.20
  -7 -16   1    2.60    1.00
   7 -16  -1    1.00    1.20
   7 -16  -1    2.50    1.30
  -7  16   1    0.50    1.00
   7  16  -1    1.60    0.90
   7  16  -1    0.20    0.30
   7  16  -1    0.10    0.90
   6 -16  -1    7.20    1.40
  -6 -16   1   11.90    1.60
   6 -16  -1    9.80    2.70
   6  16  -1   10.10    0.90
   6  16  -1    8.00    1.30
  -6  16   1    9.40    1.60
   5 -16  -1    1.60    1.10
  -5 -16   1    1.20    0.90
  -5  16   1    3.00    1.10
   5  16  -1   -0.20    0.80
   5  16  -1    1.20    0.50
  -4 -16   1    7.40    1.30
   4 -16  -1    6.10    1.20
   4 -16  -1    7.80    1.50
  -4  16   1    6.70    1.20
  -4  16   1    9.00    1.40
   4  16  -1    6.80    1.20
   4  16  -1    5.70    0.80
  -3 -16   1    7.20    1.30
   3 -16  -1    6.10    1.40
  -3  16   1    5.60    1.10
  -3  16   1    6.30    1.20
   3  16  -1    7.30    1.20
   3  16  -1    5.30    0.90
  -2 -16   1   45.00    2.50
   2 -16  -1   41.80    2.60
   2  16  -1   43.40    2.20
  -2  16   1   45.80    2.60
   2  16  -1   45.50    2.60
  -2  16   1   45.20    2.50
  -1 -16   1    5.10    1.10
   1 -16  -1    3.70    1.10
   1  16  -1    2.60    0.80
  -1  16   1    5.90    1.20
  -1  16   1    4.30    1.00
   1  16  -1    1.90    0.90
   0 -16   1    4.10    1.00
   0 -16  -1    4.00    1.10
   0  16   1    3.70    0.90
   0  16   1    6.00    1.10
   0  16  -1    3.30    0.90
   0  16  -1    3.70    0.90
  -1 -16  -1    1.30    0.90
   1 -16   1    1.20    0.80
  -1  16  -1    0.20    0.70
   1  16   1    0.90    0.60
  -1  16  -1    0.20    0.80
   1  16   1    0.40    0.80
   2 -16   1   37.50    2.40
  -2 -16  -1   33.30    2.30
   2 -16   1   34.80    2.30
  -2  16  -1   36.90    2.30
   2  16   1   35.00    2.20
  -2  16  -1   35.20    2.20
   2  16   1   36.30    2.00
   3 -16   1    5.90    1.30
  -3 -16  -1    7.30    1.40
   3 -16   1    5.50    1.30
  -3  16  -1    5.70    1.30
   3  16   1    6.50    0.90
  -3  16  -1    7.70    1.60
  -3  16  -1    6.20    1.20
   3  16   1    7.60    1.20
  -4 -16  -1    0.60    0.90
   4 -16   1    1.00    0.90
   4 -16   1    0.10    0.90
   4  16   1    2.60    1.00
  -4  16  -1    1.10    0.80
   4  16   1    1.00    0.80
   4  16   1    2.00    0.60
  -4  16  -1    2.30    0.90
  -4  16  -1    3.40    1.10
  -5 -16  -1    7.70    1.50
   5 -16   1    9.20    1.60
  -5  16  -1   10.90    1.40
   5  16   1    9.50    1.50
   5  16   1    8.80    0.90
  -5  16  -1   11.10    1.60
   5  16   1    7.20    1.20
   6 -16   1    1.30    1.20
  -6 -16  -1    0.20    0.90
   6 -16   1    1.10    1.00
  -6  16  -1    1.00    0.90
   6  16   1    1.00    1.00
   6  16   1    0.60    0.40
   6  16   1    0.30    0.80
  -6  16  -1    1.00    0.90
   7 -16   1    2.60    1.40
  -7 -16  -1    1.50    1.00
   7 -16   1    1.60    1.20
  -7  16  -1    1.90    1.00
   7  16   1    1.20    1.10
  -7  16  -1    0.10    1.00
   6 -17  -1   -0.40    1.10
  -6 -17   1   -0.20    0.80
   6  17  -1    0.30    0.90
   6  17  -1    0.70    0.40
   6  17  -1    0.70    1.00
  -6  17   1    1.20    1.00
  -5 -17   1    1.00    0.90
   5 -17  -1    1.40    1.10
   5 -17  -1    2.80    1.20
   5  17  -1    0.60    0.90
   5  17  -1    1.50    0.60
  -5  17   1   -0.20    1.00
   4 -17  -1   13.30    1.80
   4 -17  -1   12.40    1.90
  -4 -17   1   11.00    1.60
  -4  17   1   11.00    1.50
   4  17  -1   12.40    1.20
  -4  17   1   14.70    1.90
   4  17  -1   12.20    1.50
  -3 -17   1   -0.30    0.70
   3 -17  -1    1.60    1.10
   3 -17  -1    1.10    1.10
  -3  17   1    0.90    0.90
  -3  17   1    1.20    0.80
   3  17  -1    0.60    0.90
   3  17  -1    0.20    0.60
   2 -17  -1    0.10    0.90
  -2 -17   1    0.30    0.80
  -2  17   1   -0.20    0.70
  -2  17   1    0.10    0.80
   2  17  -1    0.70    0.70
   2  17  -1    1.00    0.90
   1 -17  -1    1.20    0.80
  -1 -17   1    0.10    0.70
  -1  17   1    0.60    0.80
   1  17  -1    0.40    0.60
  -1  17   1    0.00    0.70
   1  17  -1    1.50    0.90
   0 -17  -1   29.60    2.20
   0 -17   1   27.70    2.10
   0  17   1   30.80    2.20
   0  17   1   28.50    2.00
   0  17  -1   26.40    2.10
   0  17  -1   27.50    2.00
   1 -17   1    7.50    1.40
  -1 -17  -1    6.70    1.40
   1  17   1    4.40    1.10
  -1  17  -1    5.90    1.10
   1  17   1    6.10    1.00
  -1  17  -1    5.30    1.20
   2 -17   1    0.70    0.90
  -2 -17  -1    0.00    0.80
   2 -17   1    0.60    1.00
   2  17   1    2.20    0.70
   2  17   1    0.90    0.90
  -2  17  -1    1.50    0.90
  -2  17  -1    0.70    1.00
  -3 -17  -1    2.40    1.00
   3 -17   1    4.00    1.10
   3 -17   1    4.50    1.30
  -3  17  -1    3.70    1.20
   3  17   1    2.70    1.00
   3  17   1    3.00    0.80
  -3  17  -1    3.80    1.10
   4 -17   1    7.00    1.50
   4 -17   1    3.50    1.20
  -4 -17  -1    6.70    1.40
   4  17   1    7.70    1.50
   4  17   1    5.00    0.90
   4  17   1    3.70    1.10
  -4  17  -1    2.80    1.10
   5 -17   1    1.60    1.20
  -5 -17  -1   -0.20    0.80
   5  17   1    1.00    1.10
  -5  17  -1    1.20    1.00
   5  17   1    0.10    0.40
   5  17   1   -0.40    0.90
  -6 -17  -1    5.30    1.30
   6 -17   1    6.30    1.50
   6  17   1    4.00    0.60
  -6  17  -1    3.90    1.20
   6  17   1    7.00    1.50
   5 -18  -1    6.40    1.60
   5 -18  -1    7.50    1.70
   5  18  -1    6.70    1.40
  -5  18   1    4.80    1.40
   5  18  -1    6.10    0.90
   4 -18  -1    2.60    1.30
   4 -18  -1    4.00    1.40
   4  18  -1    3.10    1.20
  -4  18   1    2.20    1.10
   4  18  -1    2.70    0.80
   3 -18  -1    1.70    1.20
  -3 -18   1    1.80    1.00
  -3  18   1    0.60    0.90
   3  18  -1    1.70    0.70
  -3  18   1    2.10    1.10
   3  18  -1    1.60    1.00
   2 -18  -1   17.10    2.10
  -2 -18   1   20.60    2.00
  -2  18   1   22.10    2.00
   2  18  -1   21.20    1.70
   2  18  -1   21.90    2.00
  -2  18   1   21.90    2.20
  -1 -18   1    4.00    1.20
   1 -18  -1    5.70    1.30
   1  18  -1    3.10    1.10
  -1  18   1    7.40    1.30
  -1  18   1    5.70    1.40
   1  18  -1    6.20    1.10
   0 -18  -1    1.30    1.00
   0 -18   1    1.60    0.90
   0  18   1    1.10    1.00
   0  18   1    1.50    0.80
   0  18  -1    1.40    0.80
   0  18  -1    0.60    1.00
  -1 -18  -1    8.70    1.60
   1 -18   1    4.50    1.20
   1  18   1    5.10    1.20
   1  18   1    8.00    1.20
  -1  18  -1    4.30    1.20
  -1  18  -1    7.00    1.30
   2 -18   1   12.30    1.70
  -2 -18  -1    9.70    1.60
  -2  18  -1   13.20    1.70
   2  18   1   11.70    1.60
   2  18   1    9.80    1.30
  -2  18  -1    9.50    1.40
   3 -18   1   12.30    1.80
  -3 -18  -1   18.10    2.20
   3 -18   1   13.60    1.80
  -3  18  -1   11.30    1.60
  -3  18  -1   13.00    1.80
   3  18   1   15.50    2.00
   3  18   1   13.40    1.70
   3  18   1   14.60    1.40
   4 -18   1    1.80    1.20
  -4 -18  -1    2.70    1.20
   4 -18   1    0.70    1.10
  -4  18  -1    2.10    1.10
   4  18   1    5.10    1.40
   4  18   1    2.90    0.70
   4  18   1    1.90    1.00
   2 -19  -1   18.10    2.20
  -2  19   1   18.30    1.90
   2  19  -1   16.60    1.90
  -2  19   1   20.30    2.10
   2  19  -1   16.80    1.70
   1 -19  -1    5.60    1.40
  -1  19   1    6.30    1.30
  -1  19   1    6.40    1.40
   1  19  -1    5.80    1.10
   1  19  -1    6.20    1.50
   0 -19   1   14.10    2.30
   0 -19  -1    9.30    1.60
   0  19   1    7.60    1.30
   0  19  -1   10.50    1.40
   0  19   1    8.70    1.60
   0  19  -1    7.30    1.40
   1 -19   1    1.30    1.00
  -1 -19  -1    3.90    1.30
   1  19   1    2.30    0.90
  -1  19  -1    2.30    1.00
   1  19   1    3.50    1.20
  -1  19  -1    3.40    1.30
   2 -19   1    2.60    1.20
  -2 -19  -1    3.30    1.20
   2  19   1    3.00    1.20
  -2  19  -1    2.50    1.00
   2  19   1    3.50    1.00
  -2  19  -1    3.60    1.30
  14   0  -2    2.00    1.10
  14   0  -2    2.50    1.10
  13   0  -2    0.40    0.70
  13   0  -2    1.70    1.00
  13   0  -2    1.30    1.00
  13   0  -2    1.20    0.90
  12   0  -2    8.90    1.30
  12   0  -2    7.70    1.40
  12   0  -2   11.60    1.20
  12   0  -2    7.70    1.30
  11   0  -2   11.20    1.40
  11   0  -2    6.00    1.10
  11   0  -2    8.50    1.00
  11   0  -2    8.10    1.30
  10   0  -2    0.40    0.80
  10   0  -2    1.50    0.80
  10   0  -2    0.10    0.60
  10   0  -2    1.20    0.60
   9   0  -2    3.70    0.80
   9   0  -2    6.80    1.00
   9   0  -2    4.80    0.80
   9   0  -2    5.40    1.00
   8   0  -2    9.50    0.80
   8   0  -2    7.60    1.00
   8   0  -2   11.10    1.10
   8   0  -2   11.60    1.10
   8   0  -2    9.30    0.60
   8   0  -2   12.10    1.00
   7   0  -2    3.00    0.30
   7   0  -2    2.50    0.70
   7   0  -2    3.30    0.70
   7   0  -2    3.10    0.60
   7   0  -2    3.50    0.60
   6   0  -2  286.37    7.40
   6   0  -2  278.07    7.70
  -6   0   2  270.67    7.90
   6   0  -2  283.87    7.90
   6   0  -2  271.97    8.00
   6   0  -2  283.77    7.90
   6   0  -2  283.87    7.80
  -5   0   2   12.70    0.90
   5   0  -2   13.20    0.50
   5   0  -2   12.60    0.90
   5   0  -2   13.50    0.80
   5   0  -2   15.00    1.00
   5   0  -2   13.60    0.80
   5   0  -2   14.90    0.90
   4   0  -2   58.19    2.00
   4   0  -2   57.19    1.90
   4   0  -2   57.59    1.90
  -4   0   2   58.59    2.00
   4   0  -2   59.49    1.90
   4   0  -2   59.69    2.00
   3   0  -2    0.40    0.30
   3   0  -2    0.80    0.30
   3   0  -2    1.20    0.30
   3   0  -2    1.50    0.30
  -3   0   2    1.30    0.30
  -3   0   2    1.00    0.30
   3   0  -2    0.90    0.30
   3   0  -2    1.10    0.10
  -2   0   2   65.09    1.80
  -2   0   2   65.59    1.90
   2   0  -2   64.39    1.90
   2   0  -2   63.59    1.90
   2   0  -2   62.99    1.90
  -2   0   2   64.39    1.80
   2   0  -2   64.59    2.00
   2   0  -2   68.09    1.80
   2   0  -2   65.09    1.80
  -2   0   2   62.99    2.00
   1   0  -2    0.80    0.20
   1   0  -2    1.10    0.20
  -1   0   2    1.00    0.20
  -1   0   2    1.20    0.20
   1   0  -2    0.70    0.20
  -1   0   2    1.30    0.10
   1   0  -2    1.10    0.20
   1   0  -2    1.30    0.20
   0   0  -2  142.79    3.90
   0   0   2  145.59    4.00
   0   0   2  144.79    3.90
   0   0  -2  140.89    3.90
   0   0   2  145.99    3.90
   0   0  -2  140.49    3.90
   0   0  -2  145.89    3.90
   0   0   2  139.59    4.00
   0   0  -2  141.29    4.00
   1   0   2    3.30    0.40
   1   0   2    2.30    0.40
  -1   0  -2    2.80    0.30
  -1   0  -2    1.90    0.30
   1   0   2    2.40    0.20
  -1   0  -2    2.40    0.30
  -1   0  -2    2.70    0.20
   1   0   2    2.00    0.30
  -1   0  -2    2.40    0.30
  -2   0  -2  997.20   25.60
   2   0   2 1005.90   25.60
   2   0   2 1003.90   25.80
  -2   0  -2  946.31   25.60
  -2   0  -2  980.90   25.70
   2   0   2  985.30   25.70
  -2   0  -2  969.40   25.60
  -2   0  -2 1010.90   25.70
   2   0   2  973.70   25.60
  -3   0  -2    3.10    0.50
  -3   0  -2    2.40    0.40
   3   0   2    3.20    0.40
   3   0   2    3.00    0.40
  -3   0  -2    3.80    0.30
  -3   0  -2    3.20    0.40
   3   0   2    2.90    0.60
  -4   0  -2   78.59    2.50
   4   0   2   72.29    2.40
  -4   0  -2   70.09    2.30
   4   0   2   78.29    2.60
  -4   0  -2   75.09    2.20
   4   0   2   73.69    2.40
   4   0   2   74.09    2.50
   5   0   2    0.30    0.40
   5   0   2    0.90    0.50
  -5   0  -2    0.50    0.30
   5   0   2    0.40    0.30
  -5   0  -2   -0.20    0.40
   5   0   2    0.10    0.30
  -5   0  -2    0.10    0.20
  -6   0  -2  244.08    6.70
   6   0   2  230.08    6.70
   6   0   2  249.28    6.80
   6   0   2  237.38    7.20
   6   0   2  238.88    7.10
  -6   0  -2  230.68    6.70
  -7   0  -2    9.00    0.80
   7   0   2    8.30    1.10
   7   0   2    8.80    1.10
   7   0   2    7.00    0.80
   7   0   2    6.30    0.70
   7   0   2    7.00    0.80
   8   0   2    5.10    0.70
   8   0   2    4.10    0.90
   8   0   2    5.60    1.00
   8   0   2    5.20    0.70
   8   0   2    6.30    0.80
   9   0   2   25.30    1.40
   9   0   2   23.40    1.80
   9   0   2   22.90    1.40
   9   0   2   25.50    1.80
   9   0   2   22.50    1.50
  10   0   2   42.90    2.40
  10   0   2   37.90    1.90
  10   0   2   42.50    2.50
  10   0   2   37.90    2.00
  11   0   2    1.80    0.70
  11   0   2    2.00    1.00
  11   0   2    1.80    0.90
  11   0   2    0.20    0.50
  12   0   2    0.70    0.90
  12   0   2   -0.80    0.80
  12   0   2   -0.70    0.70
  13   0   2   13.60    1.50
  13   0   2   15.10    2.00
  13   0   2   13.00    1.90
  14  -1  -2   11.10    1.60
  14  -1  -2    7.50    1.30
  14  -1  -2    6.50    1.50
  14   1  -2    7.90    1.60
  14   1  -2    8.20    1.40
  13  -1  -2   -0.40    0.90
  13  -1  -2    1.50    0.80
  13  -1  -2    0.10    0.80
  13  -1  -2    0.30    0.90
  13   1  -2    0.40    0.90
  13   1  -2    1.70    0.90
  13   1  -2    1.20    0.90
  12  -1  -2    3.30    1.00
  12  -1  -2    4.10    1.10
  12  -1  -2    2.50    1.00
  12  -1  -2    3.00    0.90
  12   1  -2    2.90    0.70
  12   1  -2    2.00    0.90
  12   1  -2    3.40    1.10
  12   1  -2    1.70    0.90
  11  -1  -2    2.00    0.90
  11  -1  -2    2.30    0.80
  11  -1  -2    0.90    0.80
  11  -1  -2    2.10    0.90
  11   1  -2    1.80    0.60
  11   1  -2    2.70    0.90
  11   1  -2    2.00    0.90
  11   1  -2    1.80    0.80
  10  -1  -2    5.00    1.00
  10  -1  -2    4.40    1.00
  10  -1  -2    4.30    0.90
  10  -1  -2    5.50    1.00
  10   1  -2    4.10    0.70
  10   1  -2    4.70    0.90
  10   1  -2    6.10    1.10
  10   1  -2    5.00    1.00
   9  -1  -2    0.90    0.60
   9  -1  -2   -0.20    0.60
   9  -1  -2    1.10    0.60
   9  -1  -2    1.50    0.70
   9   1  -2    1.10    0.60
   9   1  -2    0.10    0.40
   9   1  -2   -0.40    0.60
   9   1  -2    1.30    0.70
   8  -1  -2   10.20    1.10
   8  -1  -2    8.70    1.00
   8  -1  -2   10.00    1.00
   8  -1  -2   10.20    1.00
   8   1  -2    7.90    0.80
   8   1  -2   10.90    1.10
   8   1  -2   10.30    1.10
   8   1  -2   11.30    1.10
   8   1  -2   10.60    0.80
  -8   1   2   11.10    1.00
   8   1  -2    8.60    0.60
   7  -1  -2    5.80    0.80
   7  -1  -2    5.20    0.60
   7  -1  -2    5.10    0.70
   7  -1  -2    5.60    0.70
   7  -1  -2    5.70    0.80
   7   1  -2    5.90    0.80
  -7   1   2    4.50    0.70
   7   1  -2    6.20    0.80
   7   1  -2    6.20    0.90
   7   1  -2    6.00    0.50
   7   1  -2    5.00    0.60
   6  -1  -2   66.19    2.30
   6  -1  -2   67.49    2.50
   6  -1  -2   65.59    2.40
   6  -1  -2   63.39    2.30
   6  -1  -2   67.89    2.40
   6   1  -2   69.19    2.40
   6   1  -2   64.09    2.10
   6   1  -2   66.99    2.20
   6   1  -2   61.79    2.40
   6   1  -2   65.99    2.30
   6   1  -2   67.49    2.10
   6   1  -2   64.99    2.00
  -6   1   2   63.99    2.40
   5  -1  -2   40.70    1.70
   5  -1  -2   41.50    1.50
   5  -1  -2   40.40    1.60
   5  -1  -2   40.60    1.60
  -5   1   2   41.10    1.70
   5   1  -2   42.30    1.70
  -5   1   2   39.90    1.50
   5   1  -2   42.50    1.40
   5   1  -2   42.20    1.60
   5   1  -2   41.20    1.50
   5   1  -2   38.50    1.70
   5   1  -2   41.20    1.30
   4  -1  -2   18.20    0.90
   4  -1  -2   16.90    0.90
   4  -1  -2   15.70    0.80
   4  -1  -2   15.30    0.90
   4  -1  -2   17.90    0.90
   4   1  -2   18.10    0.80
   4   1  -2   16.40    0.80
   4   1  -2   18.40    0.80
  -4   1   2   15.40    0.90
   4   1  -2   16.80    0.90
  -4   1   2   15.80    0.80
   4   1  -2   17.50    0.90
   3  -1  -2    9.50    0.60
   3  -1  -2   11.50    0.70
   3  -1  -2   11.60    0.70
   3  -1  -2   12.40    0.60
   3  -1  -2   12.20    0.70
  -3   1   2   11.20    0.70
   3   1  -2   12.10    0.70
   3   1  -2   11.50    0.60
   3   1  -2   10.00    0.50
   3   1  -2    9.50    0.50
   3   1  -2   10.90    0.70
  -3   1   2   11.90    0.70
   2  -1  -2   69.29    1.90
   2  -1  -2   69.59    2.10
   2  -1  -2   70.39    2.20
  -2  -1   2   73.69    2.00
   2  -1  -2   68.79    2.10
   2  -1  -2   70.09    2.00
  -2  -1   2   71.59    2.00
   2  -1  -2   71.19    2.10
   2   1  -2   72.49    2.20
  -2   1   2   73.09    2.20
   2   1  -2   73.29    2.10
  -2   1   2   73.49    2.00
   2   1  -2   74.29    2.10
   2   1  -2   72.29    2.00
   2   1  -2   73.49    2.20
   2   1  -2   73.99    2.10
  -2   1   2   70.69    2.20
   1  -1  -2  141.99    3.90
  -1  -1   2  138.69    3.70
  -1  -1   2  135.99    3.90
   1  -1  -2  141.49    3.90
   1  -1  -2  145.49    3.80
   1  -1  -2  143.79    3.90
  -1  -1   2  142.39    3.90
  -1  -1   2  144.69    3.90
   1   1  -2  141.39    3.80
   1   1  -2  143.89    3.80
   1   1  -2  139.99    3.90
   1   1  -2  132.99    3.70
  -1   1   2  140.59    3.80
  -1   1   2  140.29    3.90
   1   1  -2  140.49    3.90
   1   1  -2  148.49    3.90
  -1   1   2  142.89    3.90
   0  -1   2  317.17    8.40
   0  -1  -2  313.17    8.30
   0  -1  -2  344.87    8.40
   0  -1   2  324.47    8.30
   0  -1   2  323.17    8.40
   0  -1  -2  312.47    8.30
   0  -1   2  312.87    8.20
   0  -1   2  312.47    8.20
   0  -1  -2  299.07    8.40
   0  -1  -2  307.57    8.20
   0  -1  -2  311.07    8.30
   0   1   2  312.27    8.20
   0   1  -2  302.97    8.20
   0   1  -2  312.17    8.20
   0   1   2  311.37    8.00
   0   1  -2  313.37    8.10
   0   1   2  306.87    8.10
   0   1  -2  312.27    8.30
   0   1  -2  290.87    8.10
   0   1   2  315.57    8.20
  -1  -1  -2   57.79    1.80
  -1  -1  -2   60.59    1.80
  -1  -1  -2   61.19    1.80
  -1  -1  -2   56.89    1.70
   1  -1   2   57.49    1.90
   1  -1   2   57.89    1.80
   1  -1   2   57.29    1.80
  -1   1  -2   58.79    1.80
   1   1   2   60.49    1.80
   1   1   2   59.89    1.90
  -1   1  -2   55.89    1.70
   1   1   2   58.39    1.90
  -1   1  -2   65.89    1.80
  -1   1  -2   57.69    1.80
   2  -1   2  381.06   10.20
  -2  -1  -2  390.16   10.30
  -2  -1  -2  391.66   10.10
  -2  -1  -2  375.66   10.20
  -2  -1  -2  378.66   10.10
   2  -1   2  375.66   10.20
   2  -1   2  386.26   10.30
   2   1   2  375.06   10.00
   2   1   2  379.26   10.10
  -2   1  -2  390.46   10.10
  -2   1  -2  358.26    9.90
   2   1   2  381.86   10.20
   2   1   2  397.66   10.10
  -2   1  -2  380.36   10.10
   2   1   2  376.06    9.80
  -2   1  -2  375.46   10.10
   3  -1   2   21.70    1.10
   3  -1   2   22.60    1.00
   3  -1   2   23.70    1.00
  -3  -1  -2   22.80    1.00
  -3  -1  -2   20.60    0.90
  -3  -1  -2   20.70    1.10
   3  -1   2   22.30    1.00
  -3   1  -2   22.80    1.00
   3   1   2   19.90    1.10
  -3   1  -2   22.50    1.00
  -3   1  -2   21.60    0.80
   3   1   2   22.20    0.90
   3   1   2   19.60    1.00
   4  -1   2   18.70    1.00
  -4  -1  -2   22.10    1.20
   4  -1   2   19.20    1.00
   4  -1   2   20.10    1.20
  -4  -1  -2   19.30    0.90
   4  -1   2   20.30    1.10
  -4  -1  -2   19.70    1.00
   4   1   2   19.90    1.20
  -4   1  -2   18.30    0.80
  -4   1  -2   17.50    0.90
   4   1   2   19.50    1.00
   4   1   2   19.40    0.90
  -4   1  -2   19.30    1.00
   5  -1   2   73.89    2.60
   5  -1   2   67.69    2.60
   5  -1   2   66.19    2.30
  -5  -1  -2   69.69    2.70
   5  -1   2   71.89    2.40
  -5  -1  -2   71.09    2.20
   5   1   2   69.89    2.30
  -5   1  -2   67.89    2.50
   5   1   2   74.49    2.40
   5   1   2   75.59    2.70
   5   1   2   71.29    2.60
  -5   1  -2   70.89    2.30
  -5   1  -2   68.09    2.20
  -5   1  -2   67.49    2.30
   6  -1   2   28.50    1.30
   6  -1   2   27.40    1.60
   6  -1   2   29.60    1.40
   6  -1   2   30.40    1.60
  -6  -1  -2   33.50    1.30
  -6   1  -2   30.00    1.40
  -6   1  -2   30.50    1.30
   6   1   2   32.50    1.40
   6   1   2   31.50    1.60
   6   1   2   34.60    1.50
  -6   1  -2   30.30    1.60
   6   1   2   31.00    1.70
   7  -1   2    7.40    0.90
   7  -1   2    7.40    1.10
  -7  -1  -2    6.40    0.80
   7  -1   2    7.20    0.70
   7  -1   2    6.60    0.80
   7  -1   2    6.30    1.00
  -7   1  -2    8.30    0.70
   7   1   2    7.20    1.00
   7   1   2    8.40    1.10
   7   1   2    7.50    0.80
  -7   1  -2    6.40    0.70
   7   1   2    6.60    0.80
   7   1   2    8.50    0.80
   8  -1   2    1.90    0.50
   8  -1   2    2.60    0.80
   8  -1   2    3.10    0.60
   8  -1   2    2.30    0.70
   8  -1   2    2.00    0.80
  -8   1  -2    1.70    0.50
   8   1   2    2.80    0.90
   8   1   2    2.70    0.90
   8   1   2    2.30    0.50
   8   1   2    1.40    0.50
   8   1   2    2.20    0.60
   9  -1   2   16.20    1.30
   9  -1   2   13.80    1.10
   9  -1   2   16.50    1.30
   9  -1   2   14.30    1.60
   9  -1   2   15.90    1.60
   9   1   2   14.50    1.50
   9   1   2   16.20    1.20
   9   1   2   18.50    1.60
   9   1   2   14.80    1.10
   9   1   2   14.50    1.20
  10  -1   2    6.60    1.20
  10  -1   2   10.60    1.20
  10  -1   2    7.80    1.00
  10  -1   2    8.30    1.30
  10   1   2    9.30    1.10
  10   1   2    6.70    1.20
  10   1   2    7.80    1.20
  10   1   2    7.90    0.90
  11  -1   2   10.60    1.60
  11  -1   2   14.90    1.40
  11  -1   2    9.10    1.40
  11  -1   2   12.00    1.30
  11   1   2   13.00    1.60
  11   1   2   10.70    1.20
  11   1   2   12.70    1.60
  11   1   2   12.80    1.30
  12  -1   2   19.40    1.70
  12  -1   2   24.20    2.10
  12  -1   2   21.30    2.10
  12   1   2   19.80    2.20
  12   1   2   21.70    1.60
  12   1   2   23.80    2.30
  13  -1   2    5.30    1.40
  13  -1   2    5.20    1.40
  13  -1   2    4.30    1.00
  13   1   2    4.90    1.40
  13   1   2    4.70    1.30
  14  -2  -2   -0.20    1.00
  14  -2  -2    1.20    1.00
  14  -2  -2    0.30    0.90
  14  -2  -2    1.00    1.00
  14   2  -2   -0.20    1.00
  14   2  -2    1.40    1.10
  13  -2  -2    0.70    0.90
  13  -2  -2    0.60    0.90
  13  -2  -2   -0.60    0.90
  13  -2  -2    2.10    1.10
  13   2  -2    1.80    1.00
  13   2  -2    0.80    0.90
  13   2  -2    2.70    1.60
  12  -2  -2    2.20    1.10
  12  -2  -2    1.60    0.80
  12  -2  -2    2.90    1.00
  12  -2  -2    3.10    1.00
  12   2  -2    2.10    0.90
  12   2  -2    0.80    0.80
  12   2  -2    2.60    1.00
  11  -2  -2    5.80    1.20
  11  -2  -2    8.80    1.30
  11  -2  -2    8.80    1.20
  11  -2  -2    7.20    1.20
  11   2  -2    8.20    1.70
  11   2  -2    8.20    0.90
  11   2  -2   10.50    1.30
  11   2  -2    7.50    1.20
  10  -2  -2   13.50    1.40
  10  -2  -2   16.60    1.70
  10  -2  -2   17.10    1.50
  10  -2  -2   15.30    1.50
  10   2  -2   13.20    1.40
  10   2  -2   17.10    1.40
  10   2  -2   14.60    1.60
  10   2  -2   14.60    1.00
 -10   2   2   15.80    1.40
   9  -2  -2    7.40    1.20
   9  -2  -2    5.00    0.90
   9  -2  -2    7.80    1.00
   9  -2  -2    7.20    1.00
  -9   2   2    7.00    1.00
   9   2  -2    6.60    1.00
   9   2  -2    6.90    1.10
   9   2  -2    8.00    1.00
   9   2  -2    8.50    0.80
   8  -2  -2   51.49    2.20
   8  -2  -2   52.39    2.30
   8  -2  -2   48.50    2.20
   8  -2  -2   53.29    2.40
   8   2  -2   53.59    1.80
   8   2  -2   50.09    1.90
   8   2  -2   53.29    2.20
   8   2  -2   51.29    1.90
   8   2  -2   51.79    2.30
   8   2  -2   54.89    2.40
  -8   2   2   51.39    2.20
   7  -2  -2   79.99    2.90
   7  -2  -2   83.59    2.90
   7  -2  -2   78.49    3.00
   7  -2  -2   81.99    2.80
   7  -2  -2   83.19    2.90
   7   2  -2   83.79    2.60
   7   2  -2   80.69    2.50
   7   2  -2   80.79    2.90
   7   2  -2   79.69    3.00
  -7   2   2   76.49    2.90
   7   2  -2   84.59    2.50
   7   2  -2   81.89    2.90
   7   2  -2   84.69    2.60
   6  -2  -2   45.90    1.70
   6  -2  -2   41.00    1.80
   6  -2  -2   41.90    1.80
   6  -2  -2   41.70    1.90
   6  -2  -2   42.90    1.80
   6   2  -2   40.80    1.80
   6   2  -2   42.60    1.50
   6   2  -2   42.50    1.80
  -6   2   2   42.30    1.70
   6   2  -2   44.50    1.40
   6   2  -2   42.50    1.50
   6   2  -2   44.90    1.70
  -6   2   2   40.50    1.80
   6   2  -2   44.20    1.50
   5  -2  -2   12.90    0.80
   5  -2  -2   11.40    0.90
   5  -2  -2   11.40    0.80
   5  -2  -2   11.60    0.90
   5  -2  -2   10.80    0.90
  -5   2   2   14.70    0.90
  -5   2   2   11.40    0.80
   5   2  -2   12.00    0.80
   5   2  -2   12.50    0.60
   5   2  -2   12.20    0.90
   5   2  -2   11.60    0.60
   5   2  -2   12.50    0.70
   5   2  -2   12.40    0.90
   4  -2  -2   71.19    2.30
   4  -2  -2   70.69    2.40
   4  -2  -2   69.79    2.30
   4  -2  -2   69.79    2.40
   4  -2  -2   71.59    2.30
   4   2  -2   80.49    2.40
   4   2  -2   76.39    2.50
   4   2  -2   80.29    2.30
  -4   2   2   74.19    2.50
   4   2  -2   77.19    2.30
  -4   2   2   76.79    2.60
   4   2  -2   80.79    2.50
   3  -2  -2  100.89    3.00
  -3  -2   2   94.89    2.90
   3  -2  -2  100.99    3.00
   3  -2  -2   98.39    2.90
   3  -2  -2   98.79    2.90
   3  -2  -2   97.59    3.00
   3   2  -2   94.39    2.90
   3   2  -2   96.79    2.90
  -3   2   2   97.99    2.90
  -3   2   2   98.19    2.60
   3   2  -2   97.49    2.70
   3   2  -2  100.39    2.70
  -3   2   2  101.99    3.00
   3   2  -2   96.19    2.80
   2  -2  -2   21.40    0.80
  -2  -2   2   18.90    0.80
  -2  -2   2   20.20    0.80
   2  -2  -2   20.50    0.80
   2  -2  -2   20.10    1.00
   2  -2  -2   19.50    0.90
   2   2  -2   18.30    0.70
  -2   2   2   18.60    0.90
   2   2  -2   18.70    0.70
   2   2  -2   18.80    0.70
  -2   2   2   20.70    0.90
   2   2  -2   19.60    0.80
   2   2  -2   17.80    0.80
  -2   2   2   18.60    0.70
   1  -2  -2  100.39    2.70
  -1  -2   2   97.39    2.70
   1  -2  -2   96.19    2.80
  -1  -2   2   96.79    2.60
   1  -2  -2   96.89    2.70
   1  -2  -2   92.89    2.80
  -1  -2   2   95.59    2.60
  -1  -2   2   98.19    2.80
  -1  -2   2   99.19    2.60
  -1   2   2   97.79    2.70
   1   2  -2   97.49    2.70
   1   2  -2   94.39    2.70
  -1   2   2   99.69    2.80
   1   2  -2   97.29    2.60
   1   2  -2   96.49    2.70
   1   2  -2  100.09    2.80
  -1   2   2   93.69    2.70
   1   2  -2   94.39    2.60
   0  -2  -2 1712.83   42.50
   0  -2   2 1599.34   41.70
   0  -2   2 1584.54   41.80
   0  -2   2 1573.04   41.90
   0  -2  -2 1609.54   41.60
   0  -2  -2 1585.04   42.00
   0  -2  -2 1521.75   42.40
   0   2  -2 1551.24   41.50
   0   2   2 1583.84   41.10
   0   2  -2 1577.94   41.40
   0   2   2 1620.44   41.30
   0   2  -2 1515.75   41.00
   0   2   2 1623.34   41.10
   0   2  -2 1548.55   41.40
   0   2  -2 1579.94   40.90
  -1  -2  -2  131.29    3.60
  -1  -2  -2  134.09    3.50
  -1  -2  -2  130.39    3.50
  -1  -2  -2  127.79    3.80
  -1  -2  -2  136.89    3.70
   1  -2   2  135.49    3.80
   1  -2   2  134.19    3.70
   1  -2   2  134.59    3.80
   1  -2   2  128.89    3.60
  -1   2  -2  134.69    3.60
   1   2   2  129.19    3.50
   1   2   2  135.89    3.80
  -1   2  -2  133.39    3.70
   1   2   2  130.29    3.50
   1   2   2  128.19    3.60
  -1   2  -2  136.29    3.70
   1   2   2  136.09    3.70
  -2  -2  -2  306.27    8.10
   2  -2   2  301.47    8.30
   2  -2   2  300.87    8.20
  -2  -2  -2  314.87    8.30
   2  -2   2  301.27    8.20
   2  -2   2  300.77    8.20
   2   2   2  315.47    8.30
  -2   2  -2  304.27    8.10
   2   2   2  304.37    8.30
   2   2   2  305.67    8.10
   2   2   2  294.67    7.90
  -2   2  -2  293.77    8.20
  -2   2  -2  307.27    8.20
   2   2   2  318.07    8.10
  -2   2  -2  295.27    8.10
   3  -2   2  279.77    7.70
  -3  -2  -2  285.67    7.90
  -3  -2  -2  288.37    7.50
   3  -2   2  278.67    7.70
   3  -2   2  280.77    7.90
   3  -2   2  282.07    7.70
   3   2   2  287.97    7.60
  -3   2  -2  283.67    7.80
   3   2   2  285.67    7.90
  -3   2  -2  280.67    7.60
   3   2   2  281.07    7.80
  -3   2  -2  279.77    7.80
   3   2   2  289.47    7.60
   4  -2   2   72.29    2.40
  -4  -2  -2   75.69    2.60
   4  -2   2   71.39    2.50
   4  -2   2   70.89    2.60
   4  -2   2   71.19    2.40
  -4  -2  -2   76.79    2.20
   4   2   2   75.19    2.50
   4   2   2   77.49    2.70
  -4   2  -2   73.79    2.50
   4   2   2   75.69    2.20
   4   2   2   78.19    2.30
  -4   2  -2   72.99    2.40
  -4   2  -2   74.69    2.30
  -4   2  -2   70.59    2.40
   5  -2   2   12.20    1.00
   5  -2   2   11.70    1.10
   5  -2   2   13.60    0.90
  -5  -2  -2   10.60    0.60
   5  -2   2   13.90    0.90
  -5  -2  -2   10.80    1.00
   5   2   2   12.20    0.90
  -5   2  -2   13.40    0.90
   5   2   2   12.50    0.70
   5   2   2   13.90    1.10
  -5   2  -2   13.00    0.90
   5   2   2   13.30    0.70
  -5   2  -2   12.30    1.00
  -5   2  -2   11.90    0.80
  -6  -2  -2  107.89    3.20
  -6  -2  -2  110.49    3.80
   6  -2   2  102.59    3.80
   6  -2   2  107.39    3.70
   6  -2   2  112.49    3.40
   6  -2   2  107.69    3.50
   6   2   2  100.99    3.60
   6   2   2  111.39    3.20
  -6   2  -2  108.19    3.40
  -6   2  -2  106.39    3.30
  -6   2  -2  109.69    3.40
   6   2   2  104.79    3.40
   6   2   2  100.29    3.20
   6   2   2  104.99    3.70
  -6   2  -2  106.39    3.60
   7  -2   2    7.40    1.00
   7  -2   2    8.10    1.00
   7  -2   2    9.10    1.10
   7  -2   2    8.10    0.80
   7  -2   2    8.00    0.90
   7   2   2    9.50    1.10
   7   2   2    9.30    0.80
   7   2   2    7.90    0.80
  -7   2  -2    8.00    1.00
   7   2   2    8.90    0.80
  -7   2  -2    6.40    0.80
  -7   2  -2    8.60    0.80
   7   2   2    7.80    1.00
   8  -2   2   81.39    3.00
   8  -2   2   83.59    3.10
   8  -2   2   81.89    3.30
   8  -2   2   79.09    2.80
   8  -2   2   82.09    3.40
   8   2   2   86.99    3.40
   8   2   2   83.19    2.90
  -8   2  -2   80.19    2.90
   8   2   2   84.29    2.80
   8   2   2   76.99    3.20
   8   2   2   80.69    2.80
   9  -2   2    1.60    0.80
   9  -2   2    2.00    0.70
   9  -2   2    1.40    0.80
   9  -2   2    1.10    0.50
   9  -2   2    0.80    0.60
   9   2   2    0.70    0.70
  -9   2  -2    0.80    0.50
   9   2   2    0.40    0.70
   9   2   2    1.30    0.50
   9   2   2    0.40    0.50
   9   2   2    0.80    0.50
  10  -2   2   29.50    2.10
  10  -2   2   33.30    2.20
  10  -2   2   30.50    1.90
  10  -2   2   32.00    1.90
  10   2   2   31.60    1.60
  10   2   2   30.60    1.60
  10   2   2   32.40    2.20
  10   2   2   31.00    2.10
  11  -2   2    4.60    1.20
  11  -2   2    4.10    1.00
  11  -2   2    3.20    1.10
  11  -2   2    4.80    0.90
  11   2   2    2.40    1.00
  11   2   2    4.70    0.80
  11   2   2    2.80    0.70
  11   2   2    6.00    1.30
  12  -2   2    0.80    1.00
  12  -2   2    2.30    0.90
  12  -2   2    0.20    1.00
  12   2   2    1.60    1.00
  12   2   2    1.10    1.00
  13  -2   2    3.70    1.20
  13  -2   2    4.80    1.10
  13  -2   2    1.70    1.10
  13   2   2    4.40    1.30
  13   2   2    6.10    1.50
  14  -3  -2    8.90    1.70
  14  -3  -2    9.40    1.40
  14  -3  -2    7.90    1.50
  14  -3  -2    7.70    1.50
  14   3  -2    7.70    1.60
  14   3  -2    7.20    1.40
  13  -3  -2    5.00    1.30
  13  -3  -2    6.10    1.30
  13  -3  -2    6.20    1.20
  13  -3  -2    4.70    1.20
  13   3  -2    4.70    1.20
  13   3  -2    6.20    1.40
  12  -3  -2    4.00    1.10
  12  -3  -2    5.30    1.20
  12  -3  -2    3.60    1.10
  12  -3  -2    5.30    1.10
  12   3  -2    5.10    1.20
  12   3  -2    4.80    1.10
  12   3  -2    4.60    1.20
  11  -3  -2    2.70    0.90
  11  -3  -2    3.70    1.00
  11  -3  -2    3.90    1.10
  11  -3  -2    4.60    1.00
 -11   3   2    4.90    1.00
  11   3  -2    4.60    1.00
  11   3  -2    6.10    1.10
  11   3  -2    5.70    1.20
  10  -3  -2    3.30    0.90
  10  -3  -2    4.20    1.00
  10  -3  -2    4.70    1.00
  10  -3  -2    4.20    0.90
  10   3  -2    4.30    1.00
  10   3  -2    3.10    0.80
 -10   3   2    3.30    0.80
  10   3  -2    4.30    0.90
  10   3  -2    3.90    0.50
   9  -3  -2   18.50    1.50
   9  -3  -2   16.60    1.40
   9  -3  -2   17.30    1.50
   9  -3  -2   16.30    1.40
   9   3  -2   16.50    1.30
   9   3  -2   15.40    0.90
   9   3  -2   17.60    1.50
   9   3  -2   17.10    1.60
  -9   3   2   15.30    1.30
   9   3  -2   17.90    1.00
   8  -3  -2    6.00    0.90
   8  -3  -2    5.80    0.90
   8  -3  -2    8.30    1.00
   8  -3  -2    7.10    1.00
   8   3  -2    6.90    0.70
   8   3  -2    7.20    0.90
  -8   3   2    6.10    0.90
   8   3  -2    8.00    1.00
   8   3  -2    7.00    1.00
   8   3  -2    6.20    0.60
   8   3  -2    6.90    0.60
   7  -3  -2   41.80    1.90
   7  -3  -2   43.00    1.90
   7  -3  -2   39.90    1.90
   7  -3  -2   40.00    1.80
   7  -3  -2   40.80    1.90
   7   3  -2   47.30    1.90
   7   3  -2   44.50    2.00
   7   3  -2   43.90    1.50
  -7   3   2   43.10    1.90
   7   3  -2   43.10    1.60
   7   3  -2   46.10    1.50
   7   3  -2   43.90    1.50
   7   3  -2   44.10    2.00
   6  -3  -2   54.59    2.10
   6  -3  -2   55.79    2.10
   6  -3  -2   52.59    2.10
   6  -3  -2   54.99    2.10
   6  -3  -2   51.69    2.20
   6   3  -2   54.79    1.70
   6   3  -2   52.29    2.10
   6   3  -2   55.69    1.70
   6   3  -2   55.49    1.60
   6   3  -2   53.79    2.10
  -6   3   2   50.59    2.00
   6   3  -2   55.99    1.80
   6   3  -2   51.89    2.00
  -6   3   2   51.19    2.10
  -5  -3   2    3.00    0.60
   5  -3  -2    3.10    0.60
   5  -3  -2    3.20    0.60
   5  -3  -2    3.00    0.60
   5  -3  -2    2.90    0.60
   5  -3  -2    2.60    0.50
   5   3  -2    3.10    0.30
   5   3  -2    3.20    0.50
   5   3  -2    3.50    0.60
  -5   3   2    4.20    0.60
   5   3  -2    2.80    0.50
   5   3  -2    2.80    0.30
  -5   3   2    3.80    0.60
   4  -3  -2   16.70    0.90
   4  -3  -2   14.90    0.80
   4  -3  -2   14.10    0.90
   4  -3  -2   15.70    1.00
  -4  -3   2   16.40    0.90
   4   3  -2   17.60    0.90
  -4   3   2   15.50    0.90
   4   3  -2   18.80    0.70
  -4   3   2   16.60    0.90
   4   3  -2   16.80    0.80
   4   3  -2   13.90    0.90
   4   3  -2   17.80    0.60
   3  -3  -2  113.39    3.30
  -3  -3   2  107.49    3.30
   3  -3  -2  108.09    3.20
   3  -3  -2  113.79    3.30
   3  -3  -2  113.59    3.40
   3   3  -2  111.49    3.00
   3   3  -2  115.49    3.30
   3   3  -2  107.19    3.20
  -3   3   2  110.19    3.30
   3   3  -2  113.79    3.00
   3   3  -2  105.19    3.20
  -3   3   2  107.69    3.30
   2  -3  -2   65.19    2.00
   2  -3  -2   56.99    2.00
  -2  -3   2   60.99    1.90
   2  -3  -2   60.49    1.80
   2  -3  -2   59.69    1.90
   2   3  -2   61.79    1.90
  -2   3   2   62.69    2.00
   2   3  -2   58.89    1.80
  -2   3   2   60.89    2.00
   2   3  -2   64.49    1.90
   2   3  -2   62.59    1.80
   2   3  -2   60.79    1.80
   1  -3  -2    3.70    0.30
   1  -3  -2    4.00    0.50
  -1  -3   2    4.10    0.30
  -1  -3   2    4.10    0.40
  -1  -3   2    4.00    0.40
  -1  -3   2    4.10    0.40
   1  -3  -2    3.90    0.40
   1  -3  -2    4.30    0.40
  -1   3   2    3.70    0.40
  -1   3   2    3.50    0.40
   1   3  -2    4.70    0.40
   1   3  -2    3.90    0.30
  -1   3   2    3.50    0.40
   1   3  -2    5.00    0.40
   1   3  -2    4.00    0.40
   1   3  -2    3.70    0.40
   1   3  -2    3.80    0.20
   0  -3  -2  111.59    3.00
   0  -3   2  107.29    3.20
   0  -3   2  110.59    3.10
   0  -3  -2  108.99    3.10
   0  -3  -2  100.09    3.10
   0  -3  -2  113.09    3.20
   0  -3   2  107.59    3.10
   0   3  -2  112.29    3.10
   0   3  -2  110.69    3.00
   0   3  -2  106.69    3.10
   0   3  -2  106.99    3.10
   0   3  -2  108.89    3.10
   0   3   2  103.09    3.00
   0   3   2  107.59    3.10
   0   3   2  109.79    3.10
   1  -3   2    4.20    0.50
   1  -3   2    3.10    0.40
   1  -3   2    4.50    0.50
  -1  -3  -2    3.80    0.40
   1  -3   2    3.70    0.30
  -1  -3  -2    4.60    0.40
  -1  -3  -2    4.00    0.50
   1   3   2    4.60    0.40
   1   3   2    3.70    0.30
  -1   3  -2    4.10    0.30
  -1   3  -2    2.90    0.40
   1   3   2    4.10    0.40
   1   3   2    4.10    0.30
  -1   3  -2    3.50    0.40
   1   3   2    4.90    0.50
  -1   3  -2    4.40    0.40
   2  -3   2    4.00    0.60
  -2  -3  -2    5.00    0.40
   2  -3   2    4.70    0.50
   2  -3   2    4.20    0.50
   2  -3   2    3.70    0.50
  -2  -3  -2    5.30    0.60
   2   3   2    3.80    0.40
   2   3   2    3.80    0.30
   2   3   2    4.00    0.50
  -2   3  -2    3.90    0.40
  -2   3  -2    3.40    0.40
  -2   3  -2    4.60    0.50
  -2   3  -2    4.20    0.40
   2   3   2    5.60    0.40
  -3  -3  -2   15.40    0.70
   3  -3   2   15.50    0.90
   3  -3   2   17.90    1.10
   3  -3   2   15.30    0.90
  -3  -3  -2   13.90    1.00
   3  -3   2   16.20    0.90
   3   3   2   14.80    0.70
   3   3   2   12.90    0.90
   3   3   2   13.80    0.60
   3   3   2   14.20    0.90
  -3   3  -2   15.00    0.90
  -3   3  -2   15.60    0.70
   3   3   2   14.10    0.60
  -3   3  -2   16.20    0.90
  -4  -3  -2  275.07    8.10
   4  -3   2  295.07    7.90
   4  -3   2  287.17    8.10
   4  -3   2  284.67    7.90
   4  -3   2  281.87    7.90
  -4  -3  -2  284.17    7.60
  -4   3  -2  292.17    8.10
   4   3   2  290.17    8.10
   4   3   2  286.27    7.80
   4   3   2  285.97    8.20
  -4   3  -2  290.37    7.90
   4   3   2  298.37    7.70
  -4   3  -2  284.97    8.00
  -4   3  -2  288.57    8.10
   5  -3   2    7.00    0.80
   5  -3   2    4.60    0.80
   5  -3   2    5.40    0.60
  -5  -3  -2    8.90    1.00
  -5  -3  -2    8.10    0.50
   5  -3   2    7.20    0.80
  -5   3  -2    6.20    0.70
   5   3   2    7.00    0.50
  -5   3  -2    7.30    0.70
   5   3   2    7.70    0.80
   5   3   2    6.50    0.50
  -5   3  -2    6.70    0.80
  -5   3  -2    5.80    0.60
   5   3   2    7.60    0.90
  -6  -3  -2   78.39    3.20
   6  -3   2   86.89    2.80
   6  -3   2   85.89    3.20
  -6  -3  -2   78.89    2.50
   6  -3   2   91.59    3.10
   6  -3   2   84.69    3.00
  -6   3  -2   87.99    3.10
   6   3   2   87.89    2.60
   6   3   2   78.29    2.90
  -6   3  -2   88.59    3.00
   6   3   2   84.09    2.70
  -6   3  -2   89.49    2.90
   6   3   2   83.19    3.20
  -6   3  -2   86.99    3.00
   6   3   2   91.59    3.20
   7  -3   2   24.80    1.60
   7  -3   2   25.50    1.30
   7  -3   2   25.90    1.50
   7  -3   2   24.20    1.50
   7  -3   2   24.50    1.60
  -7  -3  -2   27.30    1.70
   7   3   2   22.80    1.10
   7   3   2   23.50    1.50
  -7   3  -2   25.80    1.30
  -7   3  -2   25.50    1.40
   7   3   2   25.90    1.20
   7   3   2   25.70    1.70
   7   3   2   25.90    1.40
  -7   3  -2   25.80    1.50
   8  -3   2   91.29    3.50
  -8  -3  -2   83.09    3.60
   8  -3   2   93.79    3.70
   8  -3   2   92.09    3.40
   8  -3   2   95.59    3.10
   8  -3   2   94.19    3.60
  -8   3  -2   91.59    3.50
  -8   3  -2   91.49    3.10
   8   3   2   89.49    3.50
   8   3   2   85.29    3.50
   8   3   2   89.99    2.90
   8   3   2   87.99    2.90
   8   3   2   91.39    3.20
   9  -3   2   18.10    1.40
   9  -3   2   17.50    1.70
   9  -3   2   17.90    1.60
   9  -3   2   15.20    1.50
   9  -3   2   15.90    1.20
   9   3   2   15.50    1.70
  -9   3  -2   16.70    1.20
   9   3   2   15.80    1.60
   9   3   2   17.10    1.10
   9   3   2   17.10    1.10
   9   3   2   15.40    1.20
  10  -3   2   25.70    2.00
  10  -3   2   30.40    2.20
  10  -3   2   27.10    1.80
  10  -3   2   25.20    1.90
  10   3   2   23.10    1.90
  10   3   2   23.60    1.90
  10   3   2   22.80    1.30
  10   3   2   25.90    1.30
  10   3   2   23.70    1.90
 -10   3  -2   25.70    1.80
  11  -3   2   10.60    1.30
  11  -3   2   10.30    1.60
  11  -3   2   11.70    1.50
  11  -3   2   10.00    1.50
  11   3   2    8.10    1.40
  11   3   2    8.40    0.90
  11   3   2   11.40    1.60
  12  -3   2    1.00    0.90
  12  -3   2    2.50    1.10
  12  -3   2    1.50    0.90
  12   3   2    1.90    0.90
  12   3   2    1.20    0.90
  13  -3   2    0.70    0.90
  13  -3   2    0.00    1.00
  13  -3   2    1.60    1.10
  13   3   2    0.10    1.00
  13   3   2    1.40    1.00
  14  -4  -2   -0.90    0.90
  14  -4  -2    0.50    1.10
  14  -4  -2    1.40    1.00
  14  -4  -2   -0.30    0.90
  14   4  -2    0.00    0.90
  14   4  -2    1.10    1.00
  13  -4  -2    2.70    1.00
  13  -4  -2    1.60    1.00
  13  -4  -2    2.20    1.10
  13  -4  -2    1.20    1.00
  13   4  -2    2.70    1.10
  13   4  -2    1.60    1.00
  12  -4  -2   12.30    1.50
  12  -4  -2   11.30    1.50
  12  -4  -2   13.70    1.70
  12  -4  -2   10.90    1.50
  12   4  -2   11.50    1.40
 -12   4   2   12.30    1.50
  12   4  -2   15.20    1.80
  12   4  -2   11.90    1.60
  11  -4  -2   -0.20    0.80
  11  -4  -2    2.20    0.90
  11  -4  -2    1.00    0.90
  11  -4  -2    0.50    0.80
  11   4  -2    1.40    0.80
 -11   4   2    1.00    0.70
  11   4  -2    2.80    1.00
  11   4  -2    1.40    0.70
  10  -4  -2   14.50    1.50
  10  -4  -2   14.10    1.40
  10  -4  -2   16.80    1.60
  10  -4  -2   11.30    1.40
  10   4  -2   14.40    1.40
  10   4  -2   15.70    1.50
  10   4  -2   16.90    1.70
 -10   4   2   17.00    1.50
   9  -4  -2   10.40    1.30
   9  -4  -2   13.40    1.40
   9  -4  -2   14.90    1.30
   9  -4  -2   11.70    1.30
   9   4  -2   15.80    0.90
   9   4  -2   13.60    1.30
   9   4  -2   13.60    0.70
   9   4  -2   17.30    1.60
  -9   4   2   15.10    1.30
   9   4  -2   14.30    1.20
   8  -4  -2   57.19    2.50
   8  -4  -2   56.19    2.50
   8  -4  -2   57.39    2.60
   8  -4  -2   61.69    2.40
   8   4  -2   57.59    2.50
   8   4  -2   59.69    2.20
   8   4  -2   61.89    2.60
  -8   4   2   61.49    2.50
   8   4  -2   60.69    1.80
   8   4  -2   58.89    1.90
   8   4  -2   58.59    2.40
   7  -4  -2    3.40    0.70
   7  -4  -2    3.60    0.70
   7  -4  -2    3.70    0.80
   7  -4  -2    3.40    0.80
   7   4  -2    3.80    0.30
   7   4  -2    4.30    0.60
  -7   4   2    4.30    0.70
   7   4  -2    2.70    0.70
   7   4  -2    4.10    0.40
   7   4  -2    4.10    0.30
   7   4  -2    3.70    0.70
   7   4  -2    4.50    0.70
   6  -4  -2    5.40    0.80
   6  -4  -2    5.00    0.80
   6  -4  -2    5.20    0.70
   6  -4  -2    5.60    0.80
  -6  -4   2    4.60    0.70
   6   4  -2    4.30    0.50
   6   4  -2    5.50    0.70
  -6   4   2    6.10    0.70
   6   4  -2    4.20    0.30
   6   4  -2    4.30    0.40
   6   4  -2    4.60    0.70
   6   4  -2    4.40    0.70
  -6   4   2    4.70    0.70
   5  -4  -2   62.09    2.10
   5  -4  -2   59.69    2.30
   5  -4  -2   61.19    2.20
  -5  -4   2   55.49    2.20
   5  -4  -2   57.89    2.20
   5   4  -2   56.29    2.10
   5   4  -2   59.09    1.60
   5   4  -2   59.39    2.10
   5   4  -2   60.99    1.70
   5   4  -2   59.19    2.10
  -5   4   2   59.89    2.20
  -4  -4   2   11.90    0.80
   4  -4  -2   13.60    0.80
   4  -4  -2   12.50    0.90
   4  -4  -2   12.70    1.00
   4  -4  -2   12.70    0.90
  -4   4   2   11.20    0.80
   4   4  -2   11.30    0.70
   4   4  -2   11.60    0.50
   4   4  -2   10.90    0.40
   4   4  -2   10.70    0.70
   4   4  -2   11.80    0.80
  -4   4   2    9.70    0.80
   3  -4  -2   61.79    2.10
   3  -4  -2   59.69    2.20
   3  -4  -2   62.19    2.00
  -3  -4   2   59.09    2.00
   3  -4  -2   58.09    1.90
  -3   4   2   59.09    2.00
   3   4  -2   57.39    1.70
   3   4  -2   57.79    1.90
   3   4  -2   60.29    2.00
   3   4  -2   59.49    1.70
  -3   4   2   59.99    2.10
   3   4  -2   57.99    1.90
  -3   4   2   57.19    1.90
   2  -4  -2  339.67    9.20
   2  -4  -2  342.67    9.10
  -2  -4   2  321.57    9.00
   2  -4  -2  349.87    8.90
   2  -4  -2  335.57    9.10
   2   4  -2  328.47    8.80
  -2   4   2  331.37    9.00
  -2   4   2  336.47    8.90
   2   4  -2  354.46    9.00
  -2   4   2  334.57    9.10
   2   4  -2  335.17    8.90
   2   4  -2  332.77    8.80
   2   4  -2  335.67    8.80
   2   4  -2  325.97    9.10
   1  -4  -2  305.07    9.20
  -1  -4   2  355.26    9.10
   1  -4  -2  354.46    9.30
   1  -4  -2  349.96    9.30
  -1  -4   2  344.87    9.30
  -1  -4   2  351.96    9.20
  -1  -4   2  345.17    9.10
   1  -4  -2  348.07    9.00
  -1   4   2  339.07    9.10
   1   4  -2  361.56    9.00
   1   4  -2  337.47    9.10
  -1   4   2  342.67    9.30
   1   4  -2  351.46    9.20
   1   4  -2  345.37    9.30
  -1   4   2  349.27    9.40
   1   4  -2  352.26    9.40
   1   4  -2  351.86    9.20
   0  -4  -2    1.00    0.20
   0  -4  -2    1.30    0.10
   0  -4   2    0.90    0.10
   0  -4  -2    0.70    0.40
   0  -4  -2    0.70    0.30
   0  -4   2    0.60    0.30
   0  -4   2    0.80    0.30
   0  -4   2    0.30    0.30
   0  -4  -2    0.90    0.30
   0   4   2    0.80    0.30
   0   4   2    0.90    0.10
   0   4  -2    0.90    0.10
   0   4   2    1.30    0.30
   0   4  -2    0.70    0.30
   0   4  -2    0.90    0.30
   0   4  -2    0.60    0.30
   0   4   2    0.40    0.30
   0   4  -2    0.90    0.20
   0   4  -2    0.60    0.30
   1  -4   2   25.30    0.90
  -1  -4  -2   23.20    1.10
   1  -4   2   24.50    1.10
  -1  -4  -2   25.20    0.90
   1  -4   2   25.20    1.10
  -1  -4  -2   25.60    1.00
   1  -4   2   27.20    1.10
  -1   4  -2   25.20    0.90
  -1   4  -2   25.90    1.10
   1   4   2   24.50    0.90
   1   4   2   25.60    1.00
   1   4   2   24.70    1.00
   1   4   2   23.80    1.10
  -1   4  -2   25.90    1.00
   1   4   2   24.10    0.70
  -1   4  -2   25.30    1.00
  -2  -4  -2  396.66   10.70
  -2  -4  -2  447.56   11.20
   2  -4   2  403.96   11.00
   2  -4   2  405.86   10.80
   2  -4   2  399.76   11.10
   2  -4   2  398.36   11.00
  -2   4  -2  394.26   10.50
  -2   4  -2  403.46   10.70
   2   4   2  395.76   10.50
  -2   4  -2  393.86   10.70
   2   4   2  406.16   10.80
  -2   4  -2  393.16   10.60
   2   4   2  387.46   10.50
   2   4   2  408.56   10.50
   3  -4   2   28.00    1.20
  -3  -4  -2   26.90    1.40
   3  -4   2   31.20    1.30
   3  -4   2   29.00    1.30
   3  -4   2   28.90    1.40
  -3  -4  -2   30.60    1.00
   3   4   2   27.80    1.00
   3   4   2   28.10    1.00
  -3   4  -2   27.10    1.20
  -3   4  -2   28.80    1.20
  -3   4  -2   27.20    1.30
   3   4   2   28.00    1.30
   3   4   2   28.90    1.00
   4  -4   2   52.39    2.00
  -4  -4  -2   55.79    2.20
   4  -4   2   54.29    2.00
   4  -4   2   53.79    2.20
  -4  -4  -2   52.79    1.60
   4  -4   2   55.79    2.10
  -4   4  -2   56.79    2.10
  -4   4  -2   55.99    2.00
  -4   4  -2   54.59    1.90
   4   4   2   51.99    1.70
   4   4   2   52.09    1.70
   4   4   2   51.79    2.10
   4   4   2   53.09    2.00
   4   4   2   53.69    1.60
  -4   4  -2   54.89    2.00
   5  -4   2  121.89    3.90
  -5  -4  -2  114.79    3.30
   5  -4   2  125.09    3.70
   5  -4   2  120.89    4.00
   5  -4   2  120.89    3.80
  -5  -4  -2  113.49    4.00
   5   4   2  116.69    4.00
  -5   4  -2  120.09    3.70
  -5   4  -2  121.09    3.80
  -5   4  -2  118.09    3.90
   5   4   2  116.79    3.80
   5   4   2  120.69    3.30
  -5   4  -2  117.39    3.80
   5   4   2  119.59    3.40
   6  -4   2   28.70    1.70
   6  -4   2   29.90    1.70
   6  -4   2   29.40    1.60
  -6  -4  -2   31.70    1.70
   6  -4   2   32.10    1.40
   6  -4   2   32.60    1.70
  -6   4  -2   30.80    1.50
  -6   4  -2   28.10    1.50
   6   4   2   32.40    1.70
   6   4   2   29.70    1.20
  -6   4  -2   32.80    1.80
   6   4   2   30.40    1.50
  -6   4  -2   31.30    1.40
   6   4   2   33.30    1.10
   7  -4   2    6.40    0.80
   7  -4   2    6.70    1.00
   7  -4   2    8.10    1.00
  -7  -4  -2    8.40    1.10
   7  -4   2    7.40    1.00
   7  -4   2    6.50    0.90
   7   4   2    8.90    1.10
   7   4   2    6.90    0.60
   7   4   2    7.60    0.60
   7   4   2    6.40    1.00
  -7   4  -2    7.60    1.00
   7   4   2    8.10    0.90
  -7   4  -2    7.40    0.80
   8  -4   2    4.90    1.00
   8  -4   2    6.80    0.80
   8  -4   2    6.40    0.90
  -8  -4  -2    6.60    1.10
   8  -4   2    7.50    1.10
   8  -4   2    7.50    1.10
  -8   4  -2    6.50    1.10
   8   4   2    6.10    1.10
   8   4   2    5.60    0.80
  -8   4  -2    6.00    0.80
   8   4   2    7.00    1.10
   8   4   2    5.70    0.60
   8   4   2    6.50    0.60
   9  -4   2   -0.30    0.80
   9  -4   2    0.80    0.70
   9  -4   2    0.80    0.80
   9  -4   2    0.30    0.70
   9  -4   2    0.80    0.60
   9   4   2   -0.20    0.70
   9   4   2    0.50    0.40
   9   4   2    0.70    0.40
  -9   4  -2    1.50    0.80
   9   4   2    0.40    0.70
   9   4   2   -0.30    0.50
  -9   4  -2    0.90    0.50
  10  -4   2    8.40    1.30
  10  -4   2    9.90    1.20
  10  -4   2    6.80    1.30
  10  -4   2    8.90    1.30
 -10   4  -2    9.30    1.10
  10   4   2    8.80    1.40
  10   4   2   10.90    1.20
  10   4   2   10.40    1.50
  10   4   2    9.80    0.90
  11  -4   2    1.60    0.80
  11  -4   2    0.30    0.90
  11  -4   2    2.50    1.10
  11  -4   2    1.80    0.90
  11   4   2    1.20    0.90
  11   4   2   -0.40    0.70
  11   4   2    1.60    0.50
  12  -4   2    1.70    1.10
  12  -4   2    1.90    1.00
  12  -4   2    0.70    0.90
  12   4   2    1.50    1.00
  12   4   2    0.90    0.90
  13  -4   2    2.90    1.30
  13  -4   2    4.30    1.30
  13  -4   2    3.70    1.20
  13   4   2    2.00    1.10
  13   4   2    1.90    1.10
  13  -5  -2    2.20    1.00
  13  -5  -2    0.80    1.00
  13  -5  -2    1.40    1.10
  13  -5  -2    2.50    1.10
  13   5  -2    3.00    1.20
  13   5  -2    1.00    1.00
 -13   5   2    2.10    1.00
  12  -5  -2    3.90    1.10
  12  -5  -2    4.80    1.20
  12  -5  -2    4.00    1.20
  12  -5  -2    2.50    1.10
  12   5  -2    5.10    1.20
 -12   5   2    5.10    1.10
  12   5  -2    3.80    1.10
  11  -5  -2   11.60    1.50
  11  -5  -2    8.10    1.30
  11  -5  -2    8.10    1.30
  11  -5  -2   10.30    1.30
  11   5  -2    7.40    1.20
  11   5  -2   10.00    1.50
  11   5  -2    9.40    1.30
 -11   5   2   10.50    1.40
  10  -5  -2   16.80    1.50
  10  -5  -2   11.00    1.40
  10  -5  -2   14.30    1.60
  10  -5  -2   15.20    1.60
 -10   5   2   14.80    1.50
  10   5  -2   14.90    1.50
  10   5  -2   16.50    1.60
  10   5  -2   16.20    1.40
   9  -5  -2    7.60    1.20
   9  -5  -2    8.30    1.20
   9  -5  -2    7.60    1.00
   9  -5  -2    8.60    1.20
   9   5  -2    9.20    0.90
   9   5  -2   10.70    1.20
   9   5  -2    6.90    1.00
  -9   5   2    8.10    1.10
   9   5  -2    9.20    1.30
   8  -5  -2   27.10    1.80
   8  -5  -2   30.60    1.80
   8  -5  -2   34.60    1.80
   8  -5  -2   28.30    1.60
   8   5  -2   29.10    1.60
   8   5  -2   29.90    1.10
   8   5  -2   28.20    1.40
   8   5  -2   29.50    1.70
   8   5  -2   31.10    1.70
  -8   5   2   29.20    1.70
   7  -5  -2   29.40    1.70
   7  -5  -2   27.10    1.50
   7  -5  -2   29.00    1.70
  -7  -5   2   35.00    1.80
   7  -5  -2   26.30    1.60
   7   5  -2   30.90    1.50
   7   5  -2   30.10    1.60
  -7   5   2   25.70    1.60
   7   5  -2   30.30    1.00
   7   5  -2   30.70    1.60
   7   5  -2   29.60    1.40
  -6  -5   2   35.90    1.80
   6  -5  -2   40.20    1.80
   6  -5  -2   39.20    1.60
   6  -5  -2   38.40    1.90
   6  -5  -2   43.20    1.90
   6   5  -2   39.80    1.70
   6   5  -2   38.70    1.70
   6   5  -2   37.60    1.60
  -6   5   2   42.20    1.80
  -6   5   2   40.20    1.80
   6   5  -2   37.80    1.20
   5  -5  -2    4.30    0.70
  -5  -5   2    3.30    0.60
   5  -5  -2    3.30    0.50
   5  -5  -2    3.30    0.60
   5  -5  -2    2.90    0.60
  -5   5   2    4.20    0.60
   5   5  -2    3.30    0.50
  -5   5   2    3.90    0.60
   5   5  -2    3.10    0.50
   5   5  -2    3.80    0.30
   5   5  -2    3.20    0.50
   5   5  -2    2.70    0.60
   4  -5  -2   10.80    0.90
   4  -5  -2   10.50    0.70
   4  -5  -2   10.00    0.80
  -4  -5   2   10.40    0.80
   4  -5  -2   10.80    0.80
   4   5  -2   11.70    0.80
  -4   5   2   12.50    0.90
   4   5  -2   12.00    0.80
  -4   5   2   12.00    0.90
   4   5  -2   11.50    0.50
  -4   5   2   10.90    0.80
   4   5  -2   10.90    0.70
   3  -5  -2   65.99    2.30
   3  -5  -2   68.49    2.30
   3  -5  -2   69.59    2.00
  -3  -5   2   65.99    2.20
   3  -5  -2   65.39    2.40
  -3   5   2   69.09    2.20
   3   5  -2   69.29    2.00
  -3   5   2   73.49    2.40
  -3   5   2   70.59    2.40
   3   5  -2   69.59    2.30
   3   5  -2   66.69    2.20
   3   5  -2   68.89    2.00
   3   5  -2   70.79    2.40
   3   5  -2   69.99    2.20
   2  -5  -2    8.80    0.80
   2  -5  -2    8.90    0.50
  -2  -5   2    9.50    0.60
   2  -5  -2    8.60    0.70
   2  -5  -2    8.10    0.70
  -2   5   2    8.30    0.70
  -2   5   2    9.40    0.70
   2   5  -2    9.10    0.50
  -2   5   2    9.60    0.60
   2   5  -2   10.10    0.60
   2   5  -2   10.30    0.70
   2   5  -2    9.10    0.70
   2   5  -2    9.70    0.50
  -1  -5   2   36.10    1.40
   1  -5  -2   37.10    1.50
   1  -5  -2   38.80    1.10
   1  -5  -2   39.10    1.50
  -1  -5   2   38.80    1.40
   1  -5  -2   38.20    1.40
  -1   5   2   36.30    1.20
  -1   5   2   37.00    1.40
   1   5  -2   38.20    1.10
   1   5  -2   35.70    1.30
   1   5  -2   36.70    1.30
   1   5  -2   35.90    1.40
   1   5  -2   39.70    1.40
   1   5  -2   37.90    1.20
  -1   5   2   37.80    1.40
   0  -5   2  461.65   12.00
   0  -5   2  465.45   12.30
   0  -5  -2  471.65   12.60
   0  -5  -2  480.85   12.10
   0  -5  -2  433.36   12.30
   0  -5   2  463.15   12.40
   0  -5  -2  474.05   12.40
   0  -5  -2  479.45   12.20
   0  -5   2  456.15   12.50
   0   5  -2  472.65   12.60
   0   5   2  481.05   12.60
   0   5  -2  475.35   12.50
   0   5  -2  460.05   12.30
   0   5  -2  485.55   12.30
   0   5  -2  473.75   12.60
   0   5  -2  459.55   12.50
   0   5   2  471.65   12.50
   0   5   2  469.95   12.20
   1  -5   2   24.20    1.10
  -1  -5  -2   22.10    1.10
   1  -5   2   21.90    0.80
  -1  -5  -2   20.70    1.00
  -1  -5  -2   23.10    1.00
   1  -5   2   19.90    1.00
   1  -5   2   24.20    1.10
  -1   5  -2   23.80    1.10
  -1   5  -2   21.80    0.80
   1   5   2   20.10    1.10
   1   5   2   22.70    0.70
  -1   5  -2   24.30    1.10
   1   5   2   22.00    0.90
  -1   5  -2   21.50    1.30
  -1   5  -2   22.60    1.00
   1   5   2   21.60    0.90
   2  -5   2  105.39    3.00
   2  -5   2  108.59    3.30
   2  -5   2  103.19    3.20
   2  -5   2  106.99    3.30
  -2  -5  -2  107.19    3.00
  -2  -5  -2   93.99    3.30
   2   5   2  104.99    3.00
   2   5   2  103.49    3.30
  -2   5  -2  109.39    3.20
  -2   5  -2  101.09    3.20
   2   5   2  106.19    3.00
   2   5   2  105.29    2.90
  -2   5  -2  106.19    3.20
   2   5   2  103.59    3.00
   3  -5   2   38.30    1.60
   3  -5   2   40.70    1.70
  -3  -5  -2   35.40    1.70
   3  -5   2   40.70    1.50
   3  -5   2   36.90    1.60
  -3  -5  -2   41.00    1.30
  -3   5  -2   37.20    1.60
  -3   5  -2   41.10    1.60
   3   5   2   38.90    1.30
  -3   5  -2   41.50    1.60
   3   5   2   37.00    1.60
   3   5   2   39.90    1.30
   3   5   2   39.80    1.40
  -3   5  -2   38.90    1.60
   4  -5   2    8.70    0.80
   4  -5   2    6.60    0.80
  -4  -5  -2    8.00    0.50
  -4  -5  -2    7.50    0.90
   4  -5   2    7.70    0.90
   4  -5   2    7.70    0.70
  -4   5  -2    8.00    0.80
   4   5   2    8.90    0.90
   4   5   2    8.80    0.50
  -4   5  -2    8.00    0.80
  -4   5  -2    9.10    0.70
   4   5   2    8.20    0.50
   4   5   2    9.60    1.00
  -4   5  -2    8.20    0.80
   4   5   2    9.70    0.60
   5  -5   2   14.40    1.10
  -5  -5  -2   15.20    1.20
  -5  -5  -2   14.90    0.60
   5  -5   2   13.00    1.10
   5  -5   2   16.30    1.10
   5  -5   2   15.20    1.00
  -5   5  -2   13.70    1.00
   5   5   2   14.90    0.80
  -5   5  -2   15.70    1.10
   5   5   2   15.50    1.10
   5   5   2   16.20    1.20
   5   5   2   14.80    0.60
   5   5   2   15.60    0.70
  -5   5  -2   15.00    0.90
  -5   5  -2   15.80    1.00
   6  -5   2    1.00    0.70
   6  -5   2    0.90    0.50
   6  -5   2    1.10    0.60
  -6  -5  -2    0.70    0.50
   6  -5   2    1.20    0.60
   6  -5   2    0.90    0.60
   6   5   2    0.70    0.50
  -6   5  -2    1.60    0.50
   6   5   2    0.60    0.20
  -6   5  -2    1.00    0.40
   6   5   2    0.70    0.30
   6   5   2    1.30    0.60
  -6   5  -2    1.90    0.60
   6   5   2    0.80    0.30
   7  -5   2    4.10    0.80
   7  -5   2    3.60    0.80
   7  -5   2    2.60    0.60
   7  -5   2    3.60    0.80
   7  -5   2    2.00    0.80
  -7  -5  -2    1.80    0.70
   7   5   2    2.80    0.30
   7   5   2    2.60    0.40
  -7   5  -2    2.50    0.60
   7   5   2    2.50    0.60
   7   5   2    3.00    0.80
   7   5   2    3.40    0.80
  -7   5  -2    3.00    0.80
   8  -5   2   19.50    1.60
   8  -5   2   20.10    1.50
   8  -5   2   23.40    1.80
   8  -5   2   20.60    1.60
   8  -5   2   21.30    1.30
  -8  -5  -2   19.40    1.70
  -8   5  -2   21.00    1.60
  -8   5  -2   21.20    1.40
   8   5   2   20.30    1.60
   8   5   2   20.80    1.00
   8   5   2   20.60    1.40
   8   5   2   19.90    0.80
   8   5   2   18.10    1.60
   9  -5   2    7.20    1.00
   9  -5   2    7.50    1.20
   9  -5   2    6.60    1.10
   9  -5   2    6.80    1.30
  -9  -5  -2    7.90    1.40
   9   5   2    7.70    1.20
   9   5   2    5.30    0.90
   9   5   2    6.80    1.10
  -9   5  -2    8.80    1.30
  -9   5  -2    6.80    0.90
   9   5   2    5.70    0.60
  10  -5   2    8.10    1.30
  10  -5   2    7.30    1.10
  10  -5   2    8.60    1.40
  10  -5   2    7.10    1.30
  10   5   2    6.20    0.70
 -10   5  -2    8.40    1.10
  10   5   2    8.20    1.30
  10   5   2    7.10    1.00
  10   5   2    5.40    1.10
  11  -5   2    9.80    1.60
  11  -5   2   14.30    1.70
  11  -5   2   13.10    1.70
  11   5   2   12.30    1.00
  11   5   2   14.70    1.80
  11   5   2   13.50    1.80
  12  -5   2    3.90    1.20
  12  -5   2    3.70    1.30
  12  -5   2    3.20    1.20
  12   5   2    2.20    1.00
  12   5   2    3.00    1.10
  13  -5   2    2.30    1.20
  13  -5   2    1.90    1.20
  13  -5   2    3.10    1.10
  13  -5   2    1.10    1.10
  13   5   2    2.90    1.20
  13   5   2    4.70    1.40
  13   5   2    2.00    1.10
  13  -6  -2    6.90    1.40
  13  -6  -2    6.40    1.50
  13  -6  -2    4.90    1.40
 -13   6   2    7.60    1.40
  13   6  -2    6.60    1.50
  13   6  -2    9.00    1.50
  12  -6  -2    7.40    1.30
  12  -6  -2    7.00    1.30
  12  -6  -2    8.00    1.50
  12  -6  -2    7.70    1.40
  12   6  -2    6.60    1.30
 -12   6   2    5.40    1.10
  12   6  -2    4.80    1.20
  11  -6  -2    7.50    1.30
  11  -6  -2    6.90    1.20
  11  -6  -2    7.50    1.30
  11  -6  -2    6.20    1.20
  11   6  -2    6.30    1.10
  11   6  -2    8.30    1.30
 -11   6   2    7.90    1.30
  11   6  -2    8.60    1.40
  10  -6  -2    1.10    0.70
  10  -6  -2    0.30    0.80
  10  -6  -2   -0.30    0.70
  10  -6  -2    0.00    0.80
  10   6  -2    0.80    0.70
 -10   6   2    1.40    0.70
  10   6  -2    1.50    0.70
  10   6  -2    0.90    0.70
   9  -6  -2   14.80    1.30
   9  -6  -2   13.30    1.40
   9  -6  -2   15.80    1.50
   9  -6  -2   15.30    1.60
   9   6  -2   11.80    1.40
  -9   6   2   16.20    1.50
   9   6  -2   14.20    1.40
   9   6  -2   13.60    1.10
   9   6  -2   15.00    1.30
   8  -6  -2   53.59    2.20
   8  -6  -2   47.10    2.50
   8  -6  -2   53.19    2.40
  -8  -6   2   48.20    2.40
   8  -6  -2   49.99    2.40
   8   6  -2   50.99    2.10
   8   6  -2   50.99    1.60
   8   6  -2   50.99    2.30
   8   6  -2   49.80    2.30
   8   6  -2   52.79    2.30
  -8   6   2   50.19    2.40
  -7  -6   2    8.70    1.00
   7  -6  -2    7.50    1.10
   7  -6  -2    7.60    0.90
   7  -6  -2    5.90    0.90
   7  -6  -2    7.10    0.90
   7   6  -2    7.10    0.90
  -7   6   2    7.60    1.00
   7   6  -2    7.70    0.80
   7   6  -2    7.90    0.90
   7   6  -2    7.80    0.90
   7   6  -2    7.60    0.90
   6  -6  -2   24.50    1.60
   6  -6  -2   21.70    1.20
   6  -6  -2   19.80    1.30
  -6  -6   2   23.20    1.40
   6  -6  -2   20.60    1.40
  -6   6   2   22.50    1.40
   6   6  -2   22.00    1.30
   6   6  -2   21.10    1.30
  -6   6   2   22.30    1.40
   6   6  -2   20.70    1.20
   6   6  -2   22.70    1.30
   5  -6  -2   23.80    1.40
  -5  -6   2   26.10    1.40
   5  -6  -2   28.10    1.50
   5  -6  -2   27.20    1.20
   5  -6  -2   26.20    1.40
   5   6  -2   29.00    1.30
   5   6  -2   24.90    0.90
  -5   6   2   25.40    1.30
  -5   6   2   27.10    1.40
  -5   6   2   27.10    1.40
   5   6  -2   28.10    1.30
   5   6  -2   27.50    1.30
  -4  -6   2    0.60    0.40
   4  -6  -2   -0.10    0.40
   4  -6  -2    0.40    0.30
   4  -6  -2    0.80    0.50
   4  -6  -2    0.40    0.40
   4   6  -2    0.50    0.30
  -4   6   2    0.20    0.40
   4   6  -2    0.40    0.20
   4   6  -2    0.10    0.40
  -4   6   2   -0.10    0.30
  -4   6   2    0.20    0.40
   4   6  -2    0.50    0.30
   4   6  -2    0.50    0.30
   3  -6  -2   70.69    2.60
  -3  -6   2   72.99    2.50
   3  -6  -2   72.09    2.50
   3  -6  -2   74.79    2.50
   3  -6  -2   74.79    2.20
  -3   6   2   72.79    2.50
   3   6  -2   71.59    2.20
  -3   6   2   70.89    2.50
   3   6  -2   75.09    2.30
   3   6  -2   71.69    2.40
   3   6  -2   71.49    2.50
   3   6  -2   72.19    2.10
  -3   6   2   71.99    2.30
   3   6  -2   73.29    2.10
   2  -6  -2  398.56   11.10
  -2  -6   2  420.56   11.00
   2  -6  -2  394.96   10.90
   2  -6  -2  403.06   11.00
   2  -6  -2  409.96   10.60
   2   6  -2  383.16   10.50
   2   6  -2  407.26   10.60
  -2   6   2  375.16   10.70
   2   6  -2  404.36   10.50
   2   6  -2  393.56   10.70
  -2   6   2  399.16   10.50
   2   6  -2  399.46   10.40
  -2   6   2  398.56   10.80
  -1  -6   2   14.20    0.80
   1  -6  -2   10.70    0.80
   1  -6  -2   13.50    0.90
   1  -6  -2   12.40    0.80
   1  -6  -2   12.80    0.50
  -1  -6   2   13.20    0.80
   1   6  -2   11.80    0.50
  -1   6   2    9.70    0.80
  -1   6   2   11.60    0.70
   1   6  -2   13.00    0.80
   1   6  -2   10.90    0.70
   1   6  -2   11.90    0.70
   1   6  -2   12.40    0.70
  -1   6   2   11.00    0.60
   0  -6  -2  394.36   10.60
   0  -6   2  400.56   10.30
   0  -6   2  397.06   10.70
   0  -6  -2  402.86   10.30
   0  -6  -2  404.16   10.70
   0  -6   2  394.06   10.60
   0  -6  -2  363.86   10.80
   0   6  -2  387.16   10.70
   0   6  -2  405.76   10.70
   0   6  -2  387.86   10.40
   0   6   2  403.96   10.70
   0   6  -2  396.16   10.80
   0   6   2  387.96   10.40
   0   6  -2  416.66   10.70
   0   6   2  398.26   10.70
   1  -6   2   53.09    1.90
  -1  -6  -2   52.29    1.80
   1  -6   2   54.29    1.90
   1  -6   2   52.19    1.60
  -1  -6  -2   52.09    1.80
   1  -6   2   51.49    1.90
  -1  -6  -2   53.49    2.00
  -1   6  -2   51.69    1.60
  -1   6  -2   53.09    1.90
   1   6   2   54.09    1.80
  -1   6  -2   51.39    1.80
  -1   6  -2   49.70    1.90
  -1   6  -2   54.99    2.00
   1   6   2   51.79    1.80
   1   6   2   53.19    1.50
  -2  -6  -2  228.28    6.20
  -2  -6  -2  208.88    6.60
   2  -6   2  232.58    6.50
   2  -6   2  231.38    6.20
   2  -6   2  230.88    6.50
   2  -6   2  236.98    6.60
   2   6   2  229.38    6.10
  -2   6  -2  232.78    6.50
   2   6   2  232.28    6.30
  -2   6  -2  227.28    6.60
   2   6   2  228.58    6.30
  -2   6  -2  231.78    6.50
   2   6   2  229.78    6.60
   2   6   2  230.58    6.30
   3  -6   2   65.29    2.30
   3  -6   2   59.29    2.40
  -3  -6  -2   63.79    1.90
   3  -6   2   60.29    2.20
  -3  -6  -2   63.49    2.40
   3  -6   2   63.59    2.10
   3   6   2   61.49    1.90
  -3   6  -2   59.79    2.30
   3   6   2   60.09    1.90
   3   6   2   60.79    2.00
  -3   6  -2   60.29    2.20
   3   6   2   62.79    2.30
  -3   6  -2   60.89    2.20
  -3   6  -2   60.29    2.20
   3   6   2   63.69    1.90
   4  -6   2   35.70    1.80
   4  -6   2   37.30    1.50
  -4  -6  -2   35.40    1.80
   4  -6   2   35.70    1.60
   4  -6   2   38.50    1.70
  -4   6  -2   34.90    1.60
   4   6   2   37.70    1.40
  -4   6  -2   37.80    1.70
  -4   6  -2   39.10    1.60
   4   6   2   38.10    1.30
   4   6   2   39.30    1.20
   4   6   2   39.10    1.80
  -4   6  -2   39.00    1.70
   5  -6   2   11.70    1.10
   5  -6   2   12.10    1.00
   5  -6   2   13.20    1.20
   5  -6   2   11.70    1.20
   5  -6   2   13.30    1.00
  -5  -6  -2   13.10    1.10
   5   6   2   11.60    1.00
  -5   6  -2   11.00    1.10
  -5   6  -2   12.50    1.00
   5   6   2   10.20    0.60
  -5   6  -2   12.50    1.10
   5   6   2   11.20    0.70
  -5   6  -2   12.00    0.90
   5   6   2   13.50    1.30
   6  -6   2   35.10    2.00
   6  -6   2   36.50    1.80
   6  -6   2   37.80    2.00
  -6  -6  -2   29.00    1.90
   6  -6   2   37.10    1.60
   6  -6   2   35.80    1.80
   6   6   2   33.70    1.20
   6   6   2   30.90    1.70
   6   6   2   33.50    1.80
  -6   6  -2   33.30    1.70
   6   6   2   37.50    1.50
  -6   6  -2   34.40    1.60
   7  -6   2   30.40    1.90
   7  -6   2   27.80    1.70
  -7  -6  -2   31.70    1.90
   7  -6   2   28.80    1.70
   7  -6   2   26.30    1.80
   7  -6   2   31.90    1.50
   7   6   2   30.40    1.80
   7   6   2   31.00    1.70
  -7   6  -2   28.80    1.70
   7   6   2   28.80    1.10
   7   6   2   29.60    1.40
  -7   6  -2   29.90    1.60
   8  -6   2   13.70    1.10
   8  -6   2   15.50    1.60
  -8  -6  -2   13.80    1.60
   8  -6   2   13.20    1.50
   8  -6   2   13.20    1.40
   8  -6   2   14.40    1.40
  -8   6  -2   13.10    1.10
  -8   6  -2   11.30    1.30
   8   6   2   13.70    1.00
   8   6   2   10.90    1.20
   8   6   2   12.80    0.80
   8   6   2   15.10    1.50
   8   6   2   15.70    1.60
  -9  -6  -2    5.90    1.20
   9  -6   2    6.80    1.30
   9  -6   2    4.80    1.20
   9  -6   2    5.20    1.10
   9  -6   2    6.00    1.10
   9   6   2    7.00    1.20
  -9   6  -2    7.00    1.20
   9   6   2    6.10    0.60
   9   6   2    3.90    0.80
   9   6   2    6.90    1.20
  -9   6  -2    6.80    1.00
 -10  -6  -2    4.80    1.20
  10  -6   2    2.00    1.00
  10  -6   2    3.20    1.10
  10  -6   2    3.60    0.90
  10  -6   2    4.60    1.10
  10   6   2    4.20    1.10
 -10   6  -2    4.40    1.10
  10   6   2    4.80    0.90
  10   6   2    3.80    1.10
  10   6   2    4.90    0.60
 -10   6  -2    5.30    1.00
  11  -6   2    1.80    1.00
  11  -6   2    0.70    1.00
  11  -6   2    4.00    1.20
  11   6   2    1.00    0.90
  11   6   2    0.00    0.80
  11   6   2    1.30    0.50
  12  -6   2    3.00    1.10
  12  -6   2    1.50    1.10
  12  -6   2    1.20    1.10
  12   6   2    1.30    1.00
  12   6   2    1.20    1.00
  13  -7  -2    9.80    1.60
  13  -7  -2   10.80    1.70
  13  -7  -2    9.40    1.70
  13  -7  -2   10.20    1.50
  13   7  -2   12.90    1.80
  13   7  -2   12.00    1.60
 -13   7   2    9.40    1.50
  13   7  -2   12.70    1.80
  12  -7  -2    1.70    1.00
  12  -7  -2    1.60    1.10
  12  -7  -2    1.60    1.00
  12  -7  -2    1.40    0.90
  12   7  -2    0.80    0.90
  12   7  -2    0.80    0.90
  12   7  -2    0.20    0.80
 -12   7   2    1.40    0.90
  11  -7  -2    1.60    0.80
  11  -7  -2    2.00    1.00
  11  -7  -2    1.00    1.00
  11  -7  -2    1.50    0.90
  11   7  -2    1.10    0.80
  11   7  -2    0.70    0.80
 -11   7   2    1.30    0.80
  11   7  -2    0.60    0.80
  11   7  -2    1.20    0.90
  10  -7  -2    5.00    1.10
  10  -7  -2    7.50    1.10
  10  -7  -2    7.60    1.40
  10  -7  -2    6.60    1.20
  10   7  -2    7.80    1.20
  10   7  -2    5.90    1.10
  10   7  -2    6.20    1.10
  10   7  -2    8.40    1.20
 -10   7   2    6.80    1.10
  -9  -7   2    4.90    1.00
   9  -7  -2    4.10    1.00
   9  -7  -2    4.00    0.80
   9  -7  -2    4.60    1.00
   9  -7  -2    4.90    1.10
   9   7  -2    6.10    1.00
  -9   7   2    6.50    1.10
   9   7  -2    4.30    0.90
   9   7  -2    5.20    0.80
   9   7  -2    6.10    1.00
   9   7  -2    4.50    0.90
  -8  -7   2   51.89    2.50
   8  -7  -2   46.40    2.40
   8  -7  -2   51.19    2.60
   8  -7  -2   49.60    2.20
   8  -7  -2   56.39    2.50
   8   7  -2   54.59    2.30
   8   7  -2   49.30    2.30
  -8   7   2   50.79    2.40
   8   7  -2   49.99    2.20
   8   7  -2   49.00    2.30
   8   7  -2   53.69    2.40
  -7  -7   2   23.60    1.60
   7  -7  -2   23.20    1.70
   7  -7  -2   22.30    1.30
   7  -7  -2   21.10    1.50
   7  -7  -2   20.70    1.50
  -7   7   2   19.50    1.50
   7   7  -2   25.50    1.40
   7   7  -2   21.80    1.40
   7   7  -2   23.50    1.40
   7   7  -2   22.70    1.40
   7   7  -2   22.60    1.40
   6  -7  -2  223.28    6.90
   6  -7  -2  225.68    6.70
  -6  -7   2  212.98    6.70
   6  -7  -2  217.48    6.60
   6  -7  -2  221.88    6.30
   6   7  -2  229.78    6.60
   6   7  -2  225.08    6.60
  -6   7   2  215.78    6.80
   6   7  -2  232.58    6.70
   6   7  -2  220.58    6.70
  -6   7   2  234.48    6.90
  -6   7   2  229.48    6.70
   6   7  -2  218.78    6.60
   5  -7  -2    0.70    0.50
  -5  -7   2    0.70    0.40
   5  -7  -2    1.20    0.40
   5  -7  -2    1.00    0.60
   5  -7  -2    0.80    0.60
  -5   7   2    0.80    0.50
   5   7  -2    0.70    0.40
   5   7  -2    0.50    0.40
  -5   7   2    1.00    0.50
  -5   7   2    1.00    0.50
   5   7  -2    1.10    0.20
   5   7  -2    0.70    0.40
   5   7  -2    0.90    0.40
  -4  -7   2   23.90    1.30
   4  -7  -2   25.00    1.50
   4  -7  -2   23.90    1.00
   4  -7  -2   22.40    1.30
   4  -7  -2   24.50    1.30
   4   7  -2   26.30    1.30
  -4   7   2   23.50    1.20
  -4   7   2   23.40    1.30
  -4   7   2   24.40    1.40
   4   7  -2   24.10    1.10
   4   7  -2   23.80    1.10
   4   7  -2   25.20    1.20
   4   7  -2   23.90    0.90
   3  -7  -2    8.70    0.50
   3  -7  -2    7.10    0.80
  -3  -7   2    7.20    0.70
   3  -7  -2    7.50    0.80
   3  -7  -2    7.80    0.70
   3   7  -2    8.10    0.50
  -3   7   2    8.10    0.80
   3   7  -2    7.90    0.70
  -3   7   2    7.10    0.80
  -3   7   2    7.80    0.70
   3   7  -2    7.10    0.50
   3   7  -2    8.30    0.80
   2  -7  -2    1.50    0.50
   2  -7  -2    2.50    0.20
   2  -7  -2    2.30    0.40
  -2  -7   2    2.00    0.40
   2  -7  -2    2.00    0.60
   2   7  -2    2.00    0.40
  -2   7   2    2.60    0.50
   2   7  -2    2.40    0.30
   2   7  -2    2.70    0.40
  -2   7   2    1.90    0.50
  -2   7   2    2.30    0.40
   2   7  -2    2.90    0.40
   2   7  -2    1.80    0.50
   1  -7  -2   13.20    0.80
  -1  -7   2   15.60    0.90
  -1  -7   2   14.40    0.90
   1  -7  -2   13.00    1.00
   1  -7  -2   12.70    0.50
   1  -7  -2   12.30    1.00
   1  -7  -2   14.70    1.00
  -1   7   2   12.40    0.60
   1   7  -2   12.90    0.50
   1   7  -2   12.40    0.80
   1   7  -2   14.90    0.80
   1   7  -2   12.50    0.80
   1   7  -2   14.40    0.90
  -1   7   2   12.20    0.80
  -1   7   2   12.60    0.90
   0  -7  -2   70.09    2.40
   0  -7  -2   77.09    2.70
   0  -7   2   72.79    2.40
   0  -7   2   70.89    2.50
   0  -7   2   72.99    2.40
   0  -7   2   70.89    2.10
   0  -7  -2   73.09    2.50
   0   7   2   70.49    2.40
   0   7  -2   72.29    2.40
   0   7   2   70.59    2.00
   0   7   2   68.69    2.30
   0   7  -2   69.59    2.00
   0   7  -2   69.19    2.40
   0   7  -2   71.29    2.30
   0   7  -2   70.89    2.40
  -1  -7  -2    7.60    0.70
   1  -7   2    6.50    0.50
   1  -7   2    6.80    0.80
   1  -7   2    6.30    0.60
   1  -7   2    6.90    0.80
  -1  -7  -2    7.40    0.80
  -1  -7  -2    7.70    0.70
   1   7   2    6.60    0.40
   1   7   2    7.50    0.60
  -1   7  -2    8.20    0.70
  -1   7  -2    6.30    0.60
  -1   7  -2    6.60    0.70
  -1   7  -2    6.50    0.70
  -1   7  -2    6.00    0.40
   1   7   2    8.10    0.60
   2  -7   2  114.49    3.50
   2  -7   2  109.99    3.20
  -2  -7  -2  112.89    3.20
   2  -7   2  109.09    3.50
   2  -7   2  104.59    3.50
  -2  -7  -2  100.49    3.60
   2   7   2  106.79    3.30
   2   7   2  112.29    3.20
  -2   7  -2  117.49    3.60
  -2   7  -2  113.19    3.60
   2   7   2  117.49    3.50
  -2   7  -2  115.39    3.60
   2   7   2  108.09    3.70
   2   7   2  114.19    3.40
  -2   7  -2  117.79    3.60
   3  -7   2   12.40    1.00
  -3  -7  -2   13.00    0.70
   3  -7   2   12.30    1.00
   3  -7   2   11.10    0.80
  -3  -7  -2   11.10    1.00
   3  -7   2   11.30    0.90
   3   7   2   12.50    0.70
   3   7   2   11.50    0.70
  -3   7  -2   10.70    0.90
   3   7   2   11.40    0.90
   3   7   2   11.80    0.80
  -3   7  -2   14.70    1.00
  -3   7  -2   12.10    0.90
   3   7   2   12.60    0.60
  -3   7  -2   13.60    0.90
   4  -7   2   58.29    2.30
   4  -7   2   53.69    2.40
   4  -7   2   59.09    2.20
   4  -7   2   58.19    2.40
   4  -7   2   56.49    2.10
  -4  -7  -2   58.89    2.50
  -4   7  -2   61.39    2.30
   4   7   2   54.79    1.80
   4   7   2   55.59    1.90
  -4   7  -2   55.39    2.20
   4   7   2   57.39    1.70
  -4   7  -2   59.19    2.20
  -4   7  -2   54.49    2.20
   4   7   2   54.59    2.30
   4   7   2   58.29    2.00
   5  -7   2   16.30    1.40
   5  -7   2   14.50    1.20
   5  -7   2   17.20    1.10
   5  -7   2   15.90    1.30
  -5  -7  -2   14.20    1.20
   5  -7   2   16.90    1.10
  -5   7  -2   14.60    1.10
   5   7   2   16.40    0.70
  -5   7  -2   15.50    1.20
   5   7   2   17.00    1.20
  -5   7  -2   14.00    1.20
   5   7   2   15.80    0.90
   6  -7   2   12.40    1.20
   6  -7   2   14.30    1.00
  -6  -7  -2   12.90    1.40
   6  -7   2   13.80    1.20
   6  -7   2   14.40    1.40
   6  -7   2   14.90    1.50
   6   7   2   13.70    1.30
   6   7   2   13.00    0.90
  -6   7  -2   15.50    1.10
  -6   7  -2   13.20    1.20
   6   7   2   15.50    1.50
   6   7   2   11.60    0.60
   7  -7   2   12.80    1.30
  -7  -7  -2   15.30    1.50
   7  -7   2   11.00    1.30
   7  -7   2   13.00    1.30
   7  -7   2   10.20    1.00
   7  -7   2   10.20    1.30
   7   7   2   11.70    1.20
  -7   7  -2   11.00    1.20
   7   7   2   13.40    0.90
   7   7   2   14.30    1.50
  -7   7  -2   11.40    1.10
   7   7   2   12.50    0.70
   8  -7   2   47.90    2.40
   8  -7   2   48.20    2.50
  -8  -7  -2   47.80    2.70
   8  -7   2   49.99    2.70
   8  -7   2   48.90    2.10
   8  -7   2   49.00    2.60
   8   7   2   50.49    2.60
   8   7   2   47.70    1.60
   8   7   2   48.30    2.30
  -8   7  -2   49.10    2.30
   8   7   2   46.60    2.40
  -8   7  -2   50.59    2.50
   9  -7   2   20.20    2.00
   9  -7   2   22.80    1.90
   9  -7   2   18.70    1.70
  -9  -7  -2   23.20    1.90
   9  -7   2   23.10    1.80
   9   7   2   20.30    1.80
  -9   7  -2   22.30    2.00
   9   7   2   20.90    2.00
  -9   7  -2   22.50    1.50
   9   7   2   21.50    1.00
   9   7   2   19.80    1.60
  10  -7   2    1.50    1.00
  10  -7   2    1.20    0.90
  10  -7   2    0.90    0.90
 -10  -7  -2   -0.20    0.80
 -10   7  -2    1.00    0.70
  10   7   2    1.60    0.70
  10   7   2    1.00    0.40
  10   7   2    1.60    0.90
  10   7   2    0.90    0.80
 -10   7  -2    2.10    0.90
  11  -7   2   10.70    1.70
  11  -7   2   11.00    1.80
  11  -7   2    8.40    1.50
  11   7   2   10.50    1.60
  11   7   2    9.50    1.60
  12  -7   2    9.30    1.60
  12  -7   2    5.30    1.50
  12  -7   2    7.50    1.50
  12  -7   2   10.20    1.50
  12   7   2    9.20    1.70
  12   7   2    8.50    1.50
  13  -8  -2    2.50    1.30
  13  -8  -2   -0.10    1.00
  13  -8  -2    2.00    1.20
  13   8  -2    3.70    1.20
  13   8  -2    1.30    1.10
  13   8  -2    3.50    1.20
 -13   8   2    3.30    1.10
  12  -8  -2   21.70    1.90
  12  -8  -2   17.10    2.00
  12  -8  -2   26.70    2.50
  12  -8  -2   20.00    2.10
  12   8  -2   17.70    1.80
  12   8  -2   18.00    2.00
 -12   8   2   22.70    2.00
  12   8  -2   22.30    2.00
  11  -8  -2   13.30    1.70
  11  -8  -2   14.90    1.50
  11  -8  -2   15.70    1.70
  11  -8  -2   15.20    1.90
  11   8  -2   14.20    1.70
  11   8  -2   16.20    1.50
  11   8  -2   16.30    1.70
 -11   8   2   12.70    1.60
  11   8  -2   14.60    1.60
  10  -8  -2    5.80    1.30
  10  -8  -2    5.00    0.90
  10  -8  -2    5.00    1.10
  10  -8  -2    2.40    1.00
  10   8  -2    5.60    1.00
  10   8  -2    6.00    1.10
  10   8  -2    4.30    1.00
  10   8  -2    5.60    1.10
 -10   8   2    5.00    1.10
  10   8  -2    4.70    0.90
   9  -8  -2   11.40    1.40
   9  -8  -2   15.20    1.70
   9  -8  -2   11.80    1.40
   9  -8  -2   11.70    1.20
  -9  -8   2   13.40    1.60
   9   8  -2   11.70    1.30
   9   8  -2   14.60    1.30
   9   8  -2   13.50    1.30
   9   8  -2   12.50    1.30
   9   8  -2   15.60    1.60
  -9   8   2   15.00    1.60
   9   8  -2   15.10    1.40
   8  -8  -2   15.90    1.20
  -8  -8   2   16.30    1.50
   8  -8  -2   13.40    1.40
   8  -8  -2   18.00    1.50
   8  -8  -2   19.10    1.80
   8   8  -2   14.80    1.30
   8   8  -2   15.20    1.30
   8   8  -2   16.90    1.20
   8   8  -2   17.60    1.40
   8   8  -2   14.90    1.30
  -8   8   2   16.50    1.50
   8   8  -2   17.40    1.30
   7  -8  -2   24.30    1.60
   7  -8  -2   22.90    1.30
  -7  -8   2   22.20    1.60
   7  -8  -2   22.30    1.60
   7  -8  -2   26.70    1.90
   7   8  -2   23.60    1.50
  -7   8   2   24.10    1.60
   7   8  -2   23.40    1.40
   7   8  -2   22.10    1.40
   7   8  -2   22.50    1.40
  -7   8   2   25.30    1.60
   7   8  -2   24.10    1.50
   7   8  -2   23.40    1.50
  -6  -8   2   20.10    1.40
   6  -8  -2   19.50    1.10
   6  -8  -2   21.00    1.50
   6  -8  -2   20.40    1.40
   6  -8  -2   18.80    1.70
  -6   8   2   23.10    1.50
   6   8  -2   22.20    1.40
   6   8  -2   20.90    1.30
  -6   8   2   19.00    1.50
   6   8  -2   23.50    1.30
  -6   8   2   20.50    1.40
   6   8  -2   22.20    1.30
  -5  -8   2   56.79    2.30
   5  -8  -2   53.59    2.50
   5  -8  -2   53.09    2.30
   5  -8  -2   56.69    1.90
   5  -8  -2   53.69    2.20
   5   8  -2   53.09    2.20
   5   8  -2   53.89    1.60
  -5   8   2   49.40    2.30
  -5   8   2   53.29    2.30
   5   8  -2   57.59    2.10
  -5   8   2   49.40    2.10
   5   8  -2   53.89    2.10
   5   8  -2   52.09    2.00
   4  -8  -2   77.39    2.80
  -4  -8   2   78.39    2.90
   4  -8  -2   77.59    2.90
   4  -8  -2   84.69    3.10
   4  -8  -2   79.59    2.40
   4   8  -2   79.69    2.50
   4   8  -2   78.59    2.80
   4   8  -2   79.99    2.70
  -4   8   2   80.69    2.70
  -4   8   2   74.19    2.80
  -4   8   2   80.39    2.90
   4   8  -2   76.29    2.30
  -3  -8   2    2.20    0.40
   3  -8  -2    1.90    0.50
   3  -8  -2    1.30    0.60
  -3  -8   2    1.60    0.50
   3  -8  -2    2.60    0.60
   3  -8  -2    1.80    0.30
  -3   8   2    2.80    0.60
   3   8  -2    1.40    0.50
  -3   8   2    1.70    0.50
   3   8  -2    2.30    0.40
   3   8  -2    1.70    0.40
   3   8  -2    1.70    0.30
  -3   8   2    1.90    0.40
   2  -8  -2   36.20    1.10
  -2  -8   2   36.60    1.60
   2  -8  -2   38.30    1.50
   2  -8  -2   35.20    1.70
   2   8  -2   32.60    1.50
  -2   8   2   36.40    1.60
  -2   8   2   33.30    1.50
  -2   8   2   34.90    1.30
   2   8  -2   34.20    1.10
   2   8  -2   32.20    1.30
   2   8  -2   35.80    1.40
  -1  -8   2   19.10    1.10
   1  -8  -2   19.60    1.00
   1  -8  -2   18.30    1.20
   1  -8  -2   19.10    1.20
   1  -8  -2   18.00    1.20
  -1  -8   2   19.40    1.10
  -1   8   2   21.60    1.20
   1   8  -2   20.10    0.70
   1   8  -2   20.80    1.00
   1   8  -2   20.00    1.10
  -1   8   2   18.40    0.80
   1   8  -2   20.10    1.00
   1   8  -2   20.20    1.00
  -1   8   2   20.00    1.10
   0  -8   2    2.50    0.50
   0  -8  -2    3.40    0.60
   0  -8  -2    2.30    0.60
   0  -8  -2    3.40    0.50
   0  -8   2    3.10    0.30
   0  -8   2    3.30    0.60
   0  -8   2    1.90    0.40
   0   8  -2    3.50    0.50
   0   8  -2    3.30    0.50
   0   8   2    3.00    0.50
   0   8   2    3.10    0.30
   0   8  -2    3.90    0.50
   0   8  -2    3.30    0.60
   0   8  -2    3.30    0.30
   0   8   2    3.00    0.50
  -1  -8  -2  234.68    6.90
   1  -8   2  231.18    6.70
   1  -8   2  232.98    6.60
   1  -8   2  227.78    6.20
  -1  -8  -2  232.98    6.50
  -1  -8  -2  225.98    6.50
  -1   8  -2  221.98    6.70
  -1   8  -2  240.88    6.70
  -1   8  -2  232.78    6.70
   1   8   2  228.68    6.20
   1   8   2  239.08    6.60
   1   8   2  229.88    6.60
  -1   8  -2  239.78    6.60
  -1   8  -2  226.48    6.60
   2  -8   2  221.68    6.60
  -2  -8  -2  220.38    6.70
   2  -8   2  225.28    6.10
  -2  -8  -2  222.88    6.20
   2  -8   2  219.08    6.50
  -2   8  -2  214.38    6.30
   2   8   2  225.18    6.20
  -2   8  -2  224.78    6.50
  -2   8  -2  229.18    6.50
   2   8   2  217.98    6.30
   2   8   2  214.78    6.00
   2   8   2  216.88    6.20
  -2   8  -2  227.58    6.50
   3  -8   2  102.09    3.10
  -3  -8  -2  106.29    3.70
   3  -8   2  104.99    3.50
   3  -8   2   98.09    3.50
   3  -8   2  102.49    3.40
   3  -8   2  100.59    3.60
  -3  -8  -2  100.69    3.00
  -3   8  -2  100.59    3.40
   3   8   2  105.19    3.60
  -3   8  -2  105.39    3.50
   3   8   2  103.79    3.10
  -3   8  -2  103.89    3.50
   3   8   2  102.69    3.10
  -3   8  -2  103.09    3.50
   3   8   2  104.79    3.30
   3   8   2  103.59    3.00
  -4  -8  -2    5.50    0.90
   4  -8   2    6.80    0.80
   4  -8   2    6.20    0.80
   4  -8   2    6.50    0.90
   4  -8   2    7.60    1.00
   4  -8   2    5.50    0.70
  -4   8  -2    8.10    1.00
   4   8   2    6.10    0.50
   4   8   2    4.80    0.50
  -4   8  -2    7.90    0.90
   4   8   2    7.20    0.70
   4   8   2    6.50    0.90
   4   8   2    6.40    0.60
  -4   8  -2    6.20    0.80
   5  -8   2   52.99    2.40
   5  -8   2   48.90    2.50
   5  -8   2   50.69    2.20
  -5  -8  -2   51.69    2.50
   5  -8   2   50.79    2.30
   5  -8   2   53.09    2.10
  -5   8  -2   52.09    2.20
   5   8   2   51.19    2.00
   5   8   2   49.70    1.70
   5   8   2   53.09    1.90
  -5   8  -2   51.59    2.20
  -5   8  -2   54.39    2.30
   5   8   2   53.09    2.40
   6  -8   2   29.50    1.60
   6  -8   2   30.10    1.80
   6  -8   2   27.90    1.60
  -6  -8  -2   27.50    1.80
   6  -8   2   27.00    1.80
   6  -8   2   25.40    1.80
   6   8   2   28.50    1.70
   6   8   2   27.10    1.40
  -6   8  -2   27.00    1.70
   6   8   2   29.00    1.10
   6   8   2   29.90    1.80
   6   8   2   27.80    1.40
  -6   8  -2   31.60    1.70
   7  -8   2    8.10    1.20
   7  -8   2    8.60    1.00
   7  -8   2    8.60    1.10
   7  -8   2    5.90    1.00
   7  -8   2    9.30    1.30
  -7  -8  -2    7.10    1.20
   7   8   2    8.30    0.80
   7   8   2    7.00    1.10
  -7   8  -2    8.20    1.00
   7   8   2    8.30    0.60
   7   8   2    7.80    1.10
  -7   8  -2   11.30    1.30
   8  -8   2    5.30    1.10
   8  -8   2    8.00    1.40
   8  -8   2    8.10    1.00
   8  -8   2    6.30    1.00
   8  -8   2    5.30    1.10
  -8  -8  -2    8.90    1.30
   8   8   2    7.80    1.20
   8   8   2    7.90    1.10
   8   8   2    7.60    0.60
   8   8   2    6.90    1.20
  -8   8  -2    6.60    1.20
  -8   8  -2    7.80    1.10
   9  -8   2   22.90    1.90
  -9  -8  -2   24.20    2.10
   9  -8   2   23.00    2.00
   9  -8   2   25.10    1.80
   9   8   2   20.80    0.90
  -9   8  -2   21.30    1.60
  -9   8  -2   21.90    1.80
   9   8   2   17.80    1.90
   9   8   2   23.90    1.90
   9   8   2   22.00    1.70
  10  -8   2    1.10    1.00
  10  -8   2    2.20    1.10
 -10  -8  -2    0.80    1.00
  10  -8   2    0.50    0.90
 -10   8  -2    1.20    0.70
  10   8   2    0.40    0.80
  10   8   2    1.20    0.90
  10   8   2    1.40    0.30
  10   8   2    0.60    0.70
 -10   8  -2    1.50    0.80
  11  -8   2    2.10    1.10
  11  -8   2    2.20    1.20
 -11  -8  -2    0.30    0.90
  11  -8   2    0.20    1.00
  11   8   2    1.40    1.00
  11   8   2    1.50    1.00
  12  -8   2    0.30    1.20
  12  -8   2    0.80    0.90
  12  -8   2    1.80    1.30
  12  -8   2    1.90    1.10
  12   8   2    0.20    0.90
  12   8   2    1.30    1.00
  12   8   2    0.20    0.90
  12  -9  -2    2.10    1.00
  12  -9  -2    3.30    1.40
  12  -9  -2    3.30    1.20
 -12   9   2    2.50    1.00
  12   9  -2    1.50    0.90
  12   9  -2    3.30    1.10
  12   9  -2    2.80    1.10
  11  -9  -2    2.30    1.10
  11  -9  -2    3.20    1.00
  11  -9  -2    1.70    1.20
 -11   9   2    3.00    1.10
  11   9  -2    1.80    0.90
  11   9  -2    1.80    0.90
  11   9  -2    2.20    0.80
  11   9  -2    2.00    0.90
 -10  -9   2   20.30    1.80
  10  -9  -2   22.20    1.80
  10  -9  -2   25.80    2.40
  10  -9  -2   21.60    1.90
 -10   9   2   22.40    1.90
  10   9  -2   23.60    1.70
  10   9  -2   24.80    1.70
  10   9  -2   24.10    1.80
  10   9  -2   20.00    1.70
  10   9  -2   24.40    1.70
   9  -9  -2    7.20    1.20
   9  -9  -2   10.90    1.50
  -9  -9   2   10.60    1.40
   9  -9  -2    9.80    1.10
   9  -9  -2   12.40    1.70
  -9   9   2   10.70    1.40
   9   9  -2   11.50    1.20
   9   9  -2    9.70    1.20
   9   9  -2   12.90    1.40
   9   9  -2   12.00    1.30
   9   9  -2   11.40    1.30
   9   9  -2   10.30    1.20
   8  -9  -2   12.00    1.30
  -8  -9   2   12.10    1.40
   8  -9  -2   12.30    1.10
   8  -9  -2   14.20    1.50
   8  -9  -2   13.60    1.60
   8   9  -2   13.70    1.30
   8   9  -2   12.60    1.20
   8   9  -2   13.50    1.40
  -8   9   2   13.20    1.50
   8   9  -2   13.10    1.20
   8   9  -2   14.30    1.40
   8   9  -2   14.30    1.40
   7  -9  -2   19.80    1.80
   7  -9  -2   16.10    1.60
  -7  -9   2   20.60    1.50
   7  -9  -2   16.20    1.10
   7  -9  -2   16.60    1.40
   7   9  -2   21.20    1.40
  -7   9   2   18.70    1.50
   7   9  -2   19.30    1.40
   7   9  -2   18.60    1.40
  -7   9   2   15.40    1.40
   7   9  -2   19.40    1.30
   7   9  -2   16.50    1.30
   6  -9  -2   45.30    2.40
   6  -9  -2   45.50    2.10
   6  -9  -2   44.30    2.20
   6  -9  -2   44.70    1.70
  -6  -9   2   39.10    2.00
   6   9  -2   46.80    2.00
  -6   9   2   47.10    2.30
  -6   9   2   49.40    2.50
   6   9  -2   48.10    2.00
  -6   9   2   43.20    2.10
   6   9  -2   45.40    2.10
   6   9  -2   45.10    2.00
   5  -9  -2    9.00    1.20
   5  -9  -2    7.80    1.10
   5  -9  -2    8.50    0.70
  -5  -9   2   10.90    1.10
   5   9  -2    8.30    1.00
  -5   9   2    9.20    1.10
  -5   9   2   10.00    1.00
   5   9  -2    9.50    0.80
   5   9  -2    8.80    0.90
   5   9  -2    8.70    0.90
  -5   9   2    7.20    0.90
   5   9  -2    8.80    0.60
   4  -9  -2   56.29    2.30
   4  -9  -2   51.19    2.30
   4  -9  -2   53.09    2.10
  -4  -9   2   48.70    2.10
   4  -9  -2   50.39    1.70
   4   9  -2   55.09    2.00
  -4   9   2   50.29    2.20
  -4   9   2   51.69    2.20
  -4   9   2   49.50    2.00
   4   9  -2   54.19    2.20
   4   9  -2   48.50    1.70
   4   9  -2   51.89    1.80
   3  -9  -2  143.69    4.80
   3  -9  -2  135.49    4.40
   3  -9  -2  152.38    3.90
  -3  -9   2  144.59    4.60
   3  -9  -2  143.59    4.70
  -3   9   2  141.99    4.60
  -3   9   2  143.89    4.30
   3   9  -2  148.59    4.20
   3   9  -2  144.89    4.60
  -3   9   2  141.39    4.60
   3   9  -2  138.39    4.30
   3   9  -2  145.09    4.10
   2  -9  -2   49.80    1.90
  -2  -9   2   50.19    2.00
   2  -9  -2   50.09    2.10
  -2  -9   2   51.39    1.90
   2  -9  -2   49.99    2.20
  -2   9   2   47.80    1.70
   2   9  -2   50.49    1.90
  -2   9   2   50.59    2.10
  -2   9   2   52.29    2.10
   2   9  -2   48.90    1.50
   2   9  -2   48.70    1.80
   2   9  -2   46.60    2.00
   1  -9  -2    4.00    0.70
  -1  -9   2    5.40    0.70
   1  -9  -2    4.80    0.60
   1  -9  -2    3.40    0.70
  -1  -9   2    3.90    0.60
  -1  -9   2    4.50    0.70
   1  -9  -2    4.20    0.70
  -1   9   2    3.10    0.60
   1   9  -2    3.00    0.60
   1   9  -2    4.60    0.30
   1   9  -2    4.70    0.60
  -1   9   2    3.30    0.60
  -1   9   2    3.90    0.40
   1   9  -2    4.00    0.60
   0  -9  -2   69.59    2.50
   0  -9   2   71.79    2.60
   0  -9   2   71.59    2.10
   0  -9  -2   70.89    2.40
   0  -9   2   72.49    2.60
   0  -9  -2   65.39    2.70
   0  -9   2   73.09    2.60
   0   9  -2   72.09    2.50
   0   9  -2   70.39    2.60
   0   9   2   74.39    2.60
   0   9   2   74.59    2.60
   0   9  -2   73.09    2.50
   0   9  -2   70.39    2.50
   0   9   2   69.19    2.20
  -1  -9  -2  209.08    5.90
   1  -9   2  205.88    6.10
  -1  -9  -2  203.28    5.90
   1  -9   2  201.28    5.60
  -1  -9  -2  198.78    6.30
   1  -9   2  207.98    6.20
  -1   9  -2  212.88    6.10
   1   9   2  198.78    5.60
  -1   9  -2  207.38    6.10
   1   9   2  212.38    6.00
   1   9   2  198.88    5.90
  -1   9  -2  201.58    5.90
  -1   9  -2  209.18    6.10
  -2  -9  -2    8.30    1.00
   2  -9   2    7.90    0.90
   2  -9   2    7.10    0.60
  -2  -9  -2    8.00    0.70
   2  -9   2    8.20    1.00
   2  -9   2    7.10    0.80
   2   9   2    7.90    0.70
  -2   9  -2    7.70    0.90
   2   9   2    8.70    0.80
   2   9   2    7.10    0.50
  -2   9  -2    7.20    0.80
  -2   9  -2    6.90    0.80
   3  -9   2    2.70    0.70
  -3  -9  -2    3.70    0.80
   3  -9   2    3.60    0.70
   3  -9   2    4.00    0.80
   3  -9   2    3.70    0.50
   3   9   2    3.30    0.50
   3   9   2    2.50    0.70
  -3   9  -2    3.60    0.70
  -3   9  -2    4.80    0.80
   3   9   2    5.60    0.50
   3   9   2    3.80    0.60
  -3   9  -2    3.00    0.60
   4  -9   2   18.20    1.30
  -4  -9  -2   19.30    1.50
   4  -9   2   20.00    1.50
   4  -9   2   16.90    1.30
   4  -9   2   17.30    1.40
   4  -9   2   19.30    1.10
   4   9   2   19.70    0.90
   4   9   2   21.20    1.20
  -4   9  -2   17.40    1.30
  -4   9  -2   20.70    1.30
   4   9   2   20.00    1.00
   4   9   2   22.10    1.50
  -4   9  -2   19.40    1.30
   5  -9   2    2.30    0.80
   5  -9   2    1.40    0.80
   5  -9   2    0.50    0.60
  -5  -9  -2    1.50    0.70
   5  -9   2    0.90    0.60
   5  -9   2    1.60    0.60
  -5   9  -2    2.20    0.70
   5   9   2    1.70    0.70
  -5   9  -2    1.90    0.70
   5   9   2    2.70    0.60
   5   9   2    2.10    0.40
  -5   9  -2    2.50    0.80
   5   9   2    1.10    0.40
   6  -9   2   21.40    1.40
  -6  -9  -2   19.50    1.60
   6  -9   2   18.20    1.60
   6  -9   2   19.80    1.80
   6  -9   2   20.70    1.40
   6  -9   2   18.30    1.60
  -6   9  -2   19.40    1.50
   6   9   2   18.20    0.80
   6   9   2   19.60    1.50
   6   9   2   17.10    1.50
   6   9   2   17.30    1.10
  -6   9  -2   17.50    1.30
   6   9   2   19.40    1.10
   7  -9   2   46.90    2.30
   7  -9   2   43.40    2.50
   7  -9   2   48.00    2.20
  -7  -9  -2   48.10    2.60
   7  -9   2   49.40    2.70
   7   9   2   50.09    2.50
   7   9   2   48.00    1.50
  -7   9  -2   46.80    2.40
   7   9   2   48.30    2.00
   7   9   2   48.60    2.00
   7   9   2   49.00    2.40
  -7   9  -2   50.19    2.30
   8  -9   2    4.70    1.00
   8  -9   2    7.10    1.30
   8  -9   2    7.00    1.00
   8  -9   2    7.20    1.40
  -8  -9  -2    5.40    1.10
   8   9   2    8.50    1.00
  -8   9  -2    7.70    1.10
   8   9   2    5.80    1.00
   8   9   2    5.10    1.10
  -8   9  -2    7.30    1.20
   8   9   2    5.60    1.10
   9  -9   2    5.80    1.10
   9  -9   2    4.30    1.20
  -9  -9  -2    4.90    1.20
   9  -9   2    3.40    1.20
   9   9   2    5.40    1.10
   9   9   2    5.40    1.10
   9   9   2    5.80    1.10
  -9   9  -2    5.20    1.20
  -9   9  -2    4.30    0.90
  10  -9   2    4.20    1.20
 -10  -9  -2    4.20    1.20
  10  -9   2    4.60    1.30
  10  -9   2    1.10    0.90
 -10   9  -2    2.10    1.00
  10   9   2    2.10    0.90
 -10   9  -2    2.90    0.90
  10   9   2    3.40    1.10
  10   9   2    2.50    1.00
 -11  -9  -2    3.00    1.20
  11  -9   2    4.30    1.50
  11  -9   2    2.10    1.20
  11  -9   2    3.80    1.20
 -11   9  -2    4.10    1.50
  11   9   2    3.60    1.10
  11   9   2    3.60    1.10
  11   9   2    1.60    1.10
  12 -10  -2    1.10    1.20
  12 -10  -2    1.70    1.10
  12 -10  -2   -0.80    0.90
  12  10  -2    1.50    1.00
  12  10  -2    2.80    1.00
 -12  10   2    1.30    0.90
  12  10  -2    3.00    1.10
  11 -10  -2    4.10    1.30
  11 -10  -2    5.40    1.50
  11 -10  -2    3.60    1.10
  11  10  -2    6.00    1.10
  11  10  -2    4.50    1.10
  11  10  -2    5.50    1.10
 -11  10   2    4.70    1.20
  11  10  -2    2.20    0.90
  10 -10  -2    1.20    0.90
  10 -10  -2    1.50    1.00
 -10 -10   2    1.10    0.80
  10 -10  -2    3.20    1.20
  10  10  -2    3.40    0.90
  10  10  -2    4.20    0.90
 -10  10   2    2.40    0.90
  10  10  -2    1.90    0.80
  10  10  -2    2.90    0.90
  -9 -10   2    9.80    1.40
   9 -10  -2   10.10    1.30
   9 -10  -2    9.60    1.60
   9 -10  -2    8.50    1.40
  -9  10   2    9.40    1.40
   9  10  -2    9.90    1.20
   9  10  -2    8.50    1.20
   9  10  -2    9.40    1.10
   9  10  -2    6.10    1.00
   9  10  -2    8.40    1.20
   9  10  -2    6.60    1.10
  -8 -10   2   19.90    1.60
   8 -10  -2   22.20    1.80
   8 -10  -2   22.80    1.70
   8 -10  -2   25.70    2.10
   8  10  -2   24.30    1.70
   8  10  -2   25.90    1.60
   8  10  -2   24.00    1.60
  -8  10   2   25.90    1.90
   8  10  -2   24.70    1.70
   8  10  -2   27.00    1.70
   8  10  -2   23.60    1.60
   7 -10  -2    0.70    0.90
  -7 -10   2    1.00    0.60
   7 -10  -2    0.90    0.70
   7 -10  -2    0.60    0.80
  -7  10   2    0.20    0.70
   7  10  -2    0.80    0.50
   7  10  -2    1.30    0.60
   7  10  -2   -0.10    0.50
   7  10  -2    0.50    0.60
  -7  10   2    0.50    0.60
   7  10  -2    0.40    0.50
   6 -10  -2   38.90    2.30
   6 -10  -2   37.00    2.00
   6 -10  -2   37.60    2.10
  -6 -10   2   34.80    2.00
  -6  10   2   35.20    1.90
   6  10  -2   37.00    1.90
   6  10  -2   38.40    1.80
  -6  10   2   37.10    2.10
   6  10  -2   32.40    1.20
   6  10  -2   34.30    1.20
   6  10  -2   36.60    1.70
   6  10  -2   37.40    1.70
   5 -10  -2  154.58    5.20
   5 -10  -2  151.48    5.30
  -5 -10   2  159.68    5.10
   5 -10  -2  153.58    4.90
  -5  10   2  147.49    4.80
   5  10  -2  156.28    5.00
   5  10  -2  155.98    4.30
   5  10  -2  152.98    4.60
   5  10  -2  156.88    4.70
  -5  10   2  154.98    5.10
  -5  10   2  148.09    5.00
   5  10  -2  150.78    4.70
   5  10  -2  149.99    4.30
   4 -10  -2   79.69    3.30
   4 -10  -2   81.29    2.90
  -4 -10   2   80.19    3.00
   4 -10  -2   79.89    3.10
  -4  10   2   76.49    2.80
   4  10  -2   84.49    2.80
   4  10  -2   74.39    2.50
   4  10  -2   79.89    2.50
   4  10  -2   80.39    3.00
  -4  10   2   83.29    3.10
  -4  10   2   83.09    3.20
   4  10  -2   81.09    2.60
  -3 -10   2   64.49    2.50
   3 -10  -2   64.89    2.70
   3 -10  -2   58.89    2.30
   3 -10  -2   64.09    2.60
   3  10  -2   65.69    2.10
  -3  10   2   63.19    2.30
   3  10  -2   70.19    2.40
   3  10  -2   64.79    2.60
  -3  10   2   61.19    2.60
  -3  10   2   67.69    2.70
   3  10  -2   70.89    2.30
   3  10  -2   65.79    2.20
   2 -10  -2   70.29    2.80
   2 -10  -2   70.09    2.50
   2 -10  -2   66.49    2.70
  -2 -10   2   68.89    2.60
   2  10  -2   68.69    2.40
   2  10  -2   67.79    2.40
   2  10  -2   71.39    2.70
  -2  10   2   67.29    2.60
  -2  10   2   68.59    2.30
   2  10  -2   67.79    2.30
  -2  10   2   68.99    2.70
   2  10  -2   68.99    2.00
   1 -10  -2   28.30    1.60
   1 -10  -2   29.90    1.60
  -1 -10   2   30.70    1.60
   1 -10  -2   31.70    1.50
   1 -10  -2   32.10    1.80
  -1 -10   2   30.90    1.50
  -1 -10   2   33.40    1.60
   1  10  -2   29.50    0.90
  -1  10   2   30.70    1.60
  -1  10   2   32.50    1.20
   1  10  -2   31.00    1.60
   1  10  -2   28.40    1.40
   1  10  -2   31.90    1.40
  -1  10   2   29.60    1.60
   1  10  -2   30.80    1.50
   0 -10   2   39.00    1.80
   0 -10  -2   37.00    1.90
   0 -10  -2   36.50    1.70
   0 -10   2   34.70    1.80
   0 -10   2   37.50    1.30
   0 -10   2   37.70    1.70
   0 -10  -2   38.40    1.60
   0  10   2   37.70    1.70
   0  10   2   39.30    1.80
   0  10  -2   39.70    1.90
   0  10   2   37.70    1.40
   0  10  -2   38.80    1.60
   0  10  -2   37.90    1.70
   1 -10   2   36.30    1.80
  -1 -10  -2   38.80    1.70
   1 -10   2   36.50    1.90
  -1 -10  -2   36.90    1.90
   1 -10   2   39.40    1.40
   1  10   2   38.30    1.60
   1  10   2   38.40    1.30
  -1  10  -2   35.90    1.80
  -1  10  -2   38.40    1.80
   1  10   2   36.30    1.70
  -1  10  -2   38.20    1.60
   2 -10   2    1.00    0.40
   2 -10   2    0.70    0.60
  -2 -10  -2    1.70    0.70
   2 -10   2    1.30    0.60
  -2  10  -2    1.00    0.50
  -2  10  -2    0.30    0.50
  -2  10  -2    1.10    0.50
   2  10   2    0.90    0.40
   2  10   2    1.30    0.30
   2  10   2    1.90    0.50
   3 -10   2   39.40    2.10
   3 -10   2   39.10    2.00
   3 -10   2   43.40    1.60
  -3 -10  -2   41.40    2.10
   3  10   2   45.80    1.90
   3  10   2   42.50    1.70
   3  10   2   40.30    1.50
  -3  10  -2   43.30    2.10
  -3  10  -2   44.40    2.00
  -3  10  -2   42.40    1.90
   3  10   2   47.60    2.20
  -4 -10  -2   30.60    1.90
   4 -10   2   30.70    1.90
   4 -10   2   31.50    1.50
   4 -10   2   29.80    2.00
   4  10   2   32.60    1.30
  -4  10  -2   29.50    1.70
  -4  10  -2   32.60    1.90
   4  10   2   34.10    1.60
   4  10   2   37.30    2.00
  -4  10  -2   31.40    1.70
   4  10   2   31.30    1.30
   5 -10   2   22.90    1.80
   5 -10   2   21.00    1.30
  -5 -10  -2   18.60    1.60
   5 -10   2   20.70    1.70
  -5  10  -2   17.90    1.40
   5  10   2   21.40    1.10
  -5  10  -2   19.20    1.60
  -5  10  -2   20.30    1.40
   5  10   2   18.60    0.90
   5  10   2   19.50    1.20
   5  10   2   22.10    1.60
  -6 -10  -2   19.80    1.70
   6 -10   2   21.40    1.80
   6 -10   2   18.90    1.80
   6 -10   2   20.90    1.40
   6  10   2   17.80    1.60
   6  10   2   17.80    0.80
   6  10   2   19.60    1.20
  -6  10  -2   21.30    1.50
  -6  10  -2   19.20    1.50
  -7 -10  -2   19.40    1.80
   7 -10   2   20.20    1.90
   7 -10   2   17.80    1.90
   7 -10   2   19.60    1.50
   7  10   2   21.80    1.70
   7  10   2   20.90    1.40
  -7  10  -2   21.10    1.60
   7  10   2   20.50    0.80
   7  10   2   21.30    1.70
  -7  10  -2   20.80    1.60
  -8 -10  -2    2.50    1.00
   8 -10   2    2.40    1.10
   8 -10   2    0.70    0.80
   8 -10   2    1.00    0.80
  -8  10  -2    0.70    0.70
  -8  10  -2    1.50    0.90
   8  10   2   -0.40    0.60
   8  10   2    1.20    0.70
   9 -10   2   22.40    2.30
  -9 -10  -2   28.10    2.30
   9 -10   2   24.90    1.90
   9 -10   2   29.00    2.30
   9  10   2   25.50    2.10
   9  10   2   24.60    2.00
  -9  10  -2   26.70    1.90
  -9  10  -2   27.30    2.10
   9  10   2   24.30    1.90
  10 -10   2    2.30    1.00
  10 -10   2    2.90    1.30
 -10 -10  -2    2.00    1.10
  10 -10   2    2.10    1.20
  10  10   2    1.40    0.80
  10  10   2    1.00    0.90
  10  10   2    2.40    1.00
 -10  10  -2    2.30    0.90
 -10  10  -2    1.90    1.00
  10  10   2    3.00    0.90
  11 -10   2    2.60    1.30
  11 -10   2    3.70    1.50
 -11 -10  -2    4.80    1.40
  11 -10   2    1.70    1.00
 -11  10  -2    3.40    1.10
  11  10   2    3.50    1.20
  11  10   2    2.50    1.10
  11  10   2    2.60    1.00
 -11  10  -2    3.40    1.10
 -11 -11   2    0.20    0.90
  11 -11  -2   -0.20    0.90
  11 -11  -2    0.90    1.00
  11 -11  -2    1.20    1.20
  11  11  -2    0.30    0.80
  11  11  -2   -0.20    0.80
 -11  11   2   -0.50    0.70
  10 -11  -2    8.10    1.60
  10 -11  -2    5.90    1.20
  10 -11  -2    5.50    1.30
 -10 -11   2    3.80    1.10
  10  11  -2    7.80    1.20
  10  11  -2    7.50    1.10
  10  11  -2    6.20    1.10
 -10  11   2    6.60    1.30
   9 -11  -2    1.30    1.20
   9 -11  -2    1.30    1.00
   9 -11  -2    1.90    0.90
  -9 -11   2    1.70    0.90
   9  11  -2    1.60    0.70
   9  11  -2    2.70    1.00
   9  11  -2    0.70    0.60
   9  11  -2    1.60    0.70
   9  11  -2    2.30    0.80
  -9  11   2    1.90    0.90
   9  11  -2    2.30    0.80
   8 -11  -2    1.80    1.10
  -8 -11   2    2.50    0.80
   8 -11  -2    0.50    0.90
   8 -11  -2    1.30    0.80
   8  11  -2    2.30    0.80
   8  11  -2    2.10    0.70
   8  11  -2    4.70    0.90
  -8  11   2    2.40    0.90
   8  11  -2    1.90    0.70
   8  11  -2    4.30    0.90
   8  11  -2    3.10    0.80
   7 -11  -2   22.80    1.90
   7 -11  -2   23.90    1.80
   7 -11  -2   22.30    1.60
  -7 -11   2   25.00    1.80
   7  11  -2   20.40    1.40
   7  11  -2   22.30    1.60
   7  11  -2   22.30    1.40
   7  11  -2   22.50    1.50
  -7  11   2   21.40    1.60
  -7  11   2   24.90    1.80
   6 -11  -2   22.10    1.50
   6 -11  -2   21.10    1.90
   6 -11  -2   24.60    1.80
  -6 -11   2   18.90    1.50
   6  11  -2   20.40    0.90
   6  11  -2   21.90    1.60
  -6  11   2   21.90    1.50
   6  11  -2   19.70    1.30
   6  11  -2   21.00    1.20
  -6  11   2   22.90    1.60
   6  11  -2   18.10    0.90
   6  11  -2   20.00    1.30
   5 -11  -2   56.59    2.70
   5 -11  -2   59.69    2.90
  -5 -11   2   61.49    2.60
   5 -11  -2   57.19    2.40
   5  11  -2   58.09    2.30
   5  11  -2   55.59    2.50
   5  11  -2   58.59    1.90
  -5  11   2   55.19    2.40
   5  11  -2   57.89    2.20
   5  11  -2   58.09    1.90
  -5  11   2   59.39    2.70
  -5  11   2   55.09    2.60
   5  11  -2   55.79    2.10
   4 -11  -2   12.70    1.30
   4 -11  -2   12.80    1.10
  -4 -11   2   13.00    1.10
   4 -11  -2   11.60    1.40
   4  11  -2   13.30    0.90
  -4  11   2   11.70    1.20
   4  11  -2   13.30    1.30
  -4  11   2   13.10    1.30
   4  11  -2   13.00    1.00
   4  11  -2   12.20    1.00
   4  11  -2   12.90    0.80
  -4  11   2   10.30    1.00
   3 -11  -2   46.10    1.90
  -3 -11   2   43.50    2.00
   3 -11  -2   42.50    2.20
   3 -11  -2   40.00    2.10
   3  11  -2   41.80    1.70
  -3  11   2   42.70    1.80
   3  11  -2   43.80    1.80
   3  11  -2   41.40    2.00
  -3  11   2   42.40    2.10
   3  11  -2   42.90    1.70
  -3  11   2   41.30    2.10
   2 -11  -2    8.00    1.10
   2 -11  -2   10.50    1.20
   2 -11  -2    9.70    1.00
  -2 -11   2    9.20    1.00
   2 -11  -2    9.10    1.20
   2  11  -2    8.40    1.00
   2  11  -2    9.30    0.90
  -2  11   2    9.90    0.80
  -2  11   2   10.60    1.10
   2  11  -2    9.20    0.90
  -2  11   2    9.90    1.10
  -1 -11   2   25.10    1.50
  -1 -11   2   25.90    1.50
   1 -11  -2   26.10    1.60
   1 -11  -2   22.90    1.60
   1 -11  -2   25.90    1.40
   1  11  -2   24.30    1.40
  -1  11   2   26.50    1.50
  -1  11   2   27.00    1.50
   1  11  -2   25.50    1.30
   1  11  -2   24.40    1.50
  -1  11   2   24.60    1.10
   0 -11  -2   75.69    2.60
   0 -11  -2   67.09    3.00
   0 -11   2   74.99    2.90
   0 -11   2   77.39    2.90
   0 -11  -2   74.89    2.80
   0 -11   2   77.49    2.90
   0  11   2   72.99    2.80
   0  11  -2   70.59    2.80
   0  11   2   68.29    2.70
   0  11   2   73.99    2.30
   0  11  -2   74.59    2.60
   0  11  -2   77.29    2.80
   1 -11   2   34.20    1.90
  -1 -11  -2   37.40    2.00
   1 -11   2   34.80    1.80
   1 -11   2   35.70    1.40
   1 -11   2   33.30    1.80
   1  11   2   33.00    1.20
  -1  11  -2   35.80    1.80
   1  11   2   32.00    1.70
  -1  11  -2   32.20    1.80
  -1  11  -2   32.00    1.60
   1  11   2   33.40    1.60
   2 -11   2   32.90    1.90
   2 -11   2   32.60    1.90
   2 -11   2   34.50    1.40
  -2 -11  -2   36.70    2.00
   2  11   2   35.80    1.70
   2  11   2   33.50    1.30
  -2  11  -2   30.20    1.70
  -2  11  -2   32.70    1.70
   2  11   2   34.20    1.50
  -2  11  -2   31.50    1.80
  -3 -11  -2    9.10    1.20
   3 -11   2    9.20    0.80
   3 -11   2    7.70    1.10
   3 -11   2    8.20    1.10
   3  11   2    7.90    0.80
  -3  11  -2   11.60    1.20
   3  11   2    9.30    1.00
  -3  11  -2    9.10    1.00
  -3  11  -2    7.90    1.10
   3  11   2    8.90    1.20
   4 -11   2    4.20    0.60
   4 -11   2    2.40    0.90
  -4 -11  -2    2.00    0.80
   4 -11   2    2.60    0.90
   4  11   2    2.30    0.40
  -4  11  -2    4.80    0.90
   4  11   2    2.90    0.60
   4  11   2    2.10    0.70
  -4  11  -2    3.30    0.80
  -4  11  -2    3.80    0.90
   5 -11   2    8.60    1.30
   5 -11   2    9.10    1.00
  -5 -11  -2    9.50    1.40
   5 -11   2    7.40    1.20
   5  11   2    5.90    0.90
  -5  11  -2    5.80    1.00
   5  11   2    6.90    0.60
  -5  11  -2    4.60    0.90
  -5  11  -2    8.40    1.10
   5  11   2    8.10    1.20
  -6 -11  -2   21.80    1.90
   6 -11   2   24.70    1.50
   6 -11   2   25.30    2.10
   6 -11   2   22.30    1.90
   6  11   2   24.50    1.80
  -6  11  -2   23.50    1.70
   6  11   2   21.40    1.00
  -6  11  -2   23.50    1.70
   6  11   2   21.30    1.40
   7 -11   2   28.60    2.10
  -7 -11  -2   30.40    2.20
   7 -11   2   27.20    2.10
   7 -11   2   32.80    1.90
  -7  11  -2   28.20    1.90
   7  11   2   29.50    2.10
   7  11   2   29.10    2.00
  -7  11  -2   32.50    2.10
  -8 -11  -2    5.30    1.30
   8 -11   2    5.50    1.10
   8 -11   2    4.60    1.30
   8 -11   2    6.00    1.20
   8  11   2    4.40    1.00
  -8  11  -2    6.30    1.10
  -8  11  -2    7.60    1.20
   8  11   2    5.20    1.10
  -9 -11  -2   27.60    2.30
   9 -11   2   28.10    2.00
   9 -11   2   26.50    2.30
   9 -11   2   29.40    2.50
   9  11   2   26.10    2.00
  -9  11  -2   31.50    2.10
  -9  11  -2   26.20    2.10
   9  11   2   27.80    2.10
   9  11   2   30.10    2.20
   9  11   2   29.30    2.00
 -10 -11  -2    1.10    1.00
  10 -11   2    0.80    1.20
  10 -11   2    1.30    1.20
  10 -11   2    0.40    0.90
 -10  11  -2    0.80    1.00
  10  11   2    1.30    0.90
  10  11   2    1.50    0.80
  10  11   2    2.30    1.00
 -10  11  -2    0.40    0.80
  10  11   2    1.50    1.00
  11 -11   2    2.30    1.40
 -11 -11  -2    2.90    1.30
  11 -11   2    1.60    1.30
  11  11   2    2.30    1.20
 -11  11  -2    4.40    1.20
  11  11   2    3.10    1.10
 -11  11  -2    1.70    1.10
  11  11   2    3.00    1.10
 -11 -12   2   14.70    1.90
  11 -12  -2   15.60    2.20
  11 -12  -2   13.40    1.70
  11 -12  -2   16.80    2.00
 -11  12   2   18.20    2.10
  10 -12  -2    1.70    1.10
  10 -12  -2    2.30    1.10
 -10 -12   2    2.80    1.10
  10 -12  -2    2.40    1.30
 -10  12   2    1.40    1.00
  10  12  -2    2.00    0.80
  10  12  -2    2.80    0.90
   9 -12  -2    5.50    1.20
   9 -12  -2    7.30    1.50
   9 -12  -2    6.20    1.30
  -9 -12   2    7.00    1.30
  -9  12   2    5.50    1.20
   9  12  -2    7.00    1.10
   9  12  -2    7.10    1.20
   9  12  -2    5.00    1.00
   8 -12  -2   10.20    1.70
  -8 -12   2    7.50    1.20
   8 -12  -2    7.60    1.20
   8 -12  -2    8.60    1.40
   8  12  -2    8.30    1.20
   8  12  -2    6.50    1.10
  -8  12   2    6.10    1.10
   8  12  -2    7.60    1.10
   8  12  -2    5.00    1.00
  -8  12   2    6.10    1.20
   7 -12  -2    1.90    0.80
   7 -12  -2    1.60    1.10
  -7 -12   2    3.20    0.90
   7 -12  -2    0.90    0.90
   7  12  -2    2.30    0.80
  -7  12   2    1.20    0.80
  -7  12   2    3.10    0.90
   7  12  -2    1.50    0.60
   6 -12  -2    8.10    1.10
   6 -12  -2    9.90    1.40
   6 -12  -2    7.80    1.20
  -6 -12   2   11.70    1.40
   6  12  -2    8.50    0.60
  -6  12   2    8.30    1.10
  -6  12   2    9.80    1.30
   6  12  -2    8.40    0.60
   6  12  -2    9.20    1.00
   6  12  -2    9.30    1.20
   5 -12  -2   33.70    1.80
   5 -12  -2   34.00    2.10
   5 -12  -2   33.60    2.20
  -5 -12   2   33.50    1.90
  -5  12   2   33.70    1.80
  -5  12   2   31.90    2.00
  -5  12   2   34.60    2.00
   5  12  -2   32.90    1.40
   5  12  -2   33.80    1.50
   5  12  -2   31.70    1.90
   5  12  -2   34.20    1.70
   4 -12  -2   13.00    1.20
   4 -12  -2    8.90    1.30
  -4 -12   2   11.10    1.30
   4 -12  -2    9.40    1.20
  -4  12   2    8.20    1.10
   4  12  -2   10.30    1.00
  -4  12   2   11.80    1.10
  -4  12   2    8.40    1.10
   4  12  -2   10.90    1.20
   4  12  -2    9.80    0.80
   3 -12  -2    6.90    1.10
   3 -12  -2    8.10    0.90
   3 -12  -2    7.50    1.10
  -3 -12   2    7.10    1.00
  -3  12   2    8.90    0.90
   3  12  -2    6.10    0.80
   3  12  -2    7.10    0.80
  -3  12   2    5.70    0.90
   3  12  -2    6.60    1.00
  -3  12   2    6.60    0.90
  -2 -12   2   18.90    1.30
   2 -12  -2   16.50    1.50
   2 -12  -2   18.60    1.50
   2 -12  -2   19.10    1.20
   2 -12  -2   18.30    1.50
  -2  12   2   17.30    1.40
   2  12  -2   17.90    1.10
   2  12  -2   16.60    1.30
   2  12  -2   14.00    1.10
  -2  12   2   16.30    1.30
  -2  12   2   18.30    1.10
   1 -12  -2   34.60    1.90
   1 -12  -2   35.00    1.60
  -1 -12   2   34.50    1.80
   1 -12  -2   34.10    2.00
   1  12  -2   36.40    1.70
  -1  12   2   30.40    1.80
   1  12  -2   35.00    1.60
  -1  12   2   36.80    1.90
  -1  12   2   35.60    1.40
   1  12  -2   31.70    1.80
   0 -12  -2   37.20    2.00
   0 -12  -2   34.10    1.60
   0 -12   2   31.70    1.80
   0 -12   2   32.30    1.80
   0  12  -2   34.00    1.90
   0  12   2   35.30    1.80
   0  12   2   35.10    1.80
   0  12  -2   37.20    1.70
   0  12  -2   33.10    1.80
  -1 -12  -2    8.50    1.20
   1 -12   2    8.60    1.10
   1 -12   2   10.80    1.20
   1 -12   2    7.30    1.10
  -1  12  -2   10.80    1.00
  -1  12  -2    8.10    1.10
  -1  12  -2   10.50    1.10
   1  12   2    9.30    1.00
   1  12   2   10.90    1.10
   2 -12   2   -0.10    0.60
   2 -12   2    0.80    0.70
  -2 -12  -2   -0.40    0.50
  -2  12  -2    0.20    0.50
  -2  12  -2    0.40    0.60
   2  12   2    0.20    0.50
   2  12   2   -0.10    0.40
  -2  12  -2    0.90    0.60
   3 -12   2    4.60    1.00
  -3 -12  -2    7.10    1.20
   3 -12   2    7.30    1.20
   3  12   2    7.10    0.90
   3  12   2    6.10    0.70
  -3  12  -2    6.50    1.00
   3  12   2    6.40    1.10
  -3  12  -2    5.80    0.90
  -3  12  -2    4.70    0.90
   4 -12   2    3.40    0.90
   4 -12   2    2.20    0.90
  -4 -12  -2    2.00    0.80
   4  12   2    1.70    0.40
   4  12   2    1.40    0.60
  -4  12  -2    2.10    0.80
   4  12   2    2.60    0.90
  -4  12  -2    2.70    0.80
  -4  12  -2    1.70    0.70
   5 -12   2   21.70    2.00
  -5 -12  -2   19.40    1.70
   5 -12   2   22.10    1.80
  -5  12  -2   17.00    1.50
   5  12   2   18.10    1.00
   5  12   2   19.70    1.70
  -5  12  -2   17.40    1.50
   5  12   2   18.90    1.30
  -6 -12  -2    7.50    1.40
   6 -12   2    8.30    1.40
   6 -12   2    7.00    1.30
   6  12   2    7.60    0.70
  -6  12  -2    8.00    1.20
   6  12   2    9.00    1.10
  -6  12  -2    8.60    1.20
   6  12   2    7.90    1.30
   7 -12   2   15.70    1.80
  -7 -12  -2   18.40    2.00
   7 -12   2   15.10    1.80
  -7  12  -2   16.80    1.60
  -7  12  -2   17.30    1.70
   7  12   2   17.30    1.80
   7  12   2   14.10    0.70
   7  12   2   16.20    1.80
   8 -12   2    4.90    1.40
   8 -12   2    5.80    1.30
  -8 -12  -2    6.60    1.40
  -8  12  -2    7.50    1.30
   8  12   2    6.30    1.20
  -8  12  -2    6.90    1.20
   8  12   2    7.90    1.40
  -9 -12  -2    2.60    1.10
   9 -12   2    1.60    1.10
   9 -12   2    1.90    1.20
   9  12   2    1.80    0.90
  -9  12  -2    3.60    1.10
   9  12   2    1.70    0.90
   9  12   2    2.70    1.10
  -9  12  -2    3.40    1.10
  10 -12   2    6.80    1.60
 -10 -12  -2    6.20    1.60
  10 -12   2    8.30    1.70
  10  12   2    7.10    1.50
 -10  12  -2    5.90    1.30
 -10  12  -2    7.60    1.40
  10  12   2    7.80    1.40
  10  12   2    8.40    1.50
  10 -13  -2    4.30    1.20
  10 -13  -2    4.40    1.50
 -10 -13   2    1.60    0.90
  10 -13  -2    3.50    1.20
 -10  13   2    4.30    1.30
  10  13  -2    3.00    1.00
   9 -13  -2   16.60    1.70
  -9 -13   2   14.90    1.80
   9 -13  -2   17.10    2.00
   9 -13  -2   18.50    2.20
   9  13  -2   15.80    1.80
  -9  13   2   18.20    2.00
   9  13  -2   16.60    1.70
  -8 -13   2    5.20    1.10
   8 -13  -2    4.20    1.20
   8 -13  -2    8.00    1.50
   8 -13  -2    4.70    1.10
  -8  13   2    5.50    1.10
   8  13  -2    6.40    1.20
   8  13  -2    5.40    1.10
   8  13  -2    5.50    1.00
   8  13  -2    7.50    1.10
  -8  13   2    6.30    1.30
   7 -13  -2    2.20    1.20
  -7 -13   2    2.20    0.90
   7 -13  -2    3.20    1.00
   7 -13  -2    1.60    1.00
   7  13  -2    4.30    0.90
  -7  13   2    5.10    1.00
   7  13  -2    3.70    0.80
  -7  13   2    3.20    1.00
   6 -13  -2   16.60    1.70
   6 -13  -2   13.40    1.70
   6 -13  -2   18.30    1.50
  -6 -13   2   15.70    1.50
  -6  13   2   16.60    1.50
  -6  13   2   19.20    1.70
   6  13  -2   17.00    1.50
   6  13  -2   15.90    1.20
   6  13  -2   13.60    0.80
  -5 -13   2    2.10    0.80
   5 -13  -2    2.80    1.00
   5 -13  -2    0.80    0.60
   5 -13  -2    0.40    0.90
   5  13  -2    0.50    0.40
  -5  13   2    2.40    0.80
  -5  13   2    2.00    0.70
   5  13  -2    1.70    0.60
  -5  13   2    0.70    0.80
   5  13  -2    1.20    0.70
   4 -13  -2    4.50    0.80
  -4 -13   2    3.00    0.80
   4 -13  -2    3.90    1.10
   4 -13  -2    3.60    1.00
   4  13  -2    3.90    0.90
  -4  13   2    3.80    0.90
   4  13  -2    4.60    0.80
  -4  13   2    5.30    1.00
  -4  13   2    4.40    0.80
   4  13  -2    3.10    0.60
   3 -13  -2   11.30    1.40
   3 -13  -2    7.50    1.20
  -3 -13   2    9.90    1.20
   3 -13  -2    7.50    1.10
   3 -13  -2    9.80    1.00
  -3  13   2    8.90    1.10
  -3  13   2    9.10    1.20
   3  13  -2    8.70    0.90
   3  13  -2    8.90    0.90
   3  13  -2    9.60    1.20
  -3  13   2    9.10    1.10
   2 -13  -2    9.50    1.40
  -2 -13   2    8.90    1.10
   2 -13  -2   10.80    1.10
   2 -13  -2    9.70    1.30
   2 -13  -2   10.40    1.40
   2  13  -2    9.40    1.00
  -2  13   2    8.60    1.10
  -2  13   2   10.20    1.20
   2  13  -2   10.10    1.00
   2  13  -2   10.80    1.20
  -1 -13   2   40.00    2.00
   1 -13  -2   37.00    2.20
   1 -13  -2   35.40    1.70
  -1  13   2   38.80    2.00
   1  13  -2   34.50    2.00
  -1  13   2   38.00    2.00
   1  13  -2   35.10    1.70
   1  13  -2   37.80    1.90
   0 -13  -2   70.09    3.10
   0 -13  -2   67.39    2.50
   0 -13   2   63.39    2.80
   0 -13   2   67.29    2.90
   0  13   2   59.39    2.60
   0  13  -2   61.29    2.50
   0  13  -2   63.99    2.60
   0  13  -2   67.69    2.90
   0  13   2   68.29    2.80
  -1 -13  -2   79.69    3.50
   1 -13   2   82.89    3.30
   1 -13   2   87.39    3.40
   1  13   2   89.39    3.20
  -1  13  -2   87.79    3.20
   1  13   2   90.49    3.30
  -1  13  -2   81.79    3.30
  -1  13  -2   85.69    3.40
  -2 -13  -2    1.50    0.80
   2 -13   2    2.00    0.80
   2 -13   2    3.00    0.80
   2 -13   2    4.10    1.00
  -2  13  -2    3.40    0.80
  -2  13  -2    3.00    0.80
  -2  13  -2    1.90    0.70
   2  13   2    2.70    0.80
   2  13   2    2.40    0.60
  -3 -13  -2   16.20    1.70
   3 -13   2   13.30    1.50
   3 -13   2   11.30    1.40
  -3  13  -2   11.70    1.30
  -3  13  -2   14.60    1.30
   3  13   2   13.50    1.00
   3  13   2   13.60    1.60
   3  13   2   15.20    1.40
   4 -13   2   26.40    1.90
  -4 -13  -2   22.80    1.80
   4 -13   2   29.00    2.10
   4  13   2   22.50    1.30
   4  13   2   24.50    1.90
  -4  13  -2   23.10    1.60
   4  13   2   23.00    1.50
  -4  13  -2   26.10    1.80
   5 -13   2    1.80    1.00
  -5 -13  -2    2.30    1.00
   5 -13   2    1.30    1.00
   5  13   2    1.60    0.90
  -5  13  -2    2.00    0.80
  -5  13  -2    1.60    0.80
   5  13   2    2.40    0.80
   5  13   2    2.30    0.50
   6 -13   2    5.00    1.30
  -6 -13  -2    4.60    1.10
   6 -13   2    2.70    1.10
  -6  13  -2    4.70    1.10
   6  13   2    3.00    1.00
   6  13   2    3.10    0.80
   6  13   2    3.90    0.50
  -6  13  -2    4.80    1.10
   7 -13   2    1.30    1.10
   7 -13   2   -0.90    0.90
  -7 -13  -2    2.10    1.00
   7  13   2    1.60    0.30
   7  13   2    2.00    0.90
  -7  13  -2    2.40    0.90
  -7  13  -2    0.90    0.80
   7  13   2    1.30    0.90
   8 -13   2    2.50    1.20
   8 -13   2    3.80    1.40
  -8 -13  -2    1.60    0.90
  -8  13  -2    2.20    0.90
   8  13   2    2.70    1.10
   8  13   2    1.10    0.90
  -8  13  -2    2.30    1.10
  -9 -13  -2    1.50    1.00
   9 -13   2   -0.30    1.20
   9 -13   2    2.80    1.20
  -9  13  -2    0.10    0.80
   9  13   2    0.50    0.80
  -9  13  -2    1.20    1.00
   9  13   2    1.40    0.90
   9  13   2    0.10    0.90
   9 -14  -2    5.40    1.60
  -9 -14   2    3.60    1.20
   9 -14  -2    4.10    1.10
   9 -14  -2    5.50    1.30
   9  14  -2    7.90    1.40
   9  14  -2    4.90    1.10
  -9  14   2    3.20    1.20
   8 -14  -2    9.10    1.80
   8 -14  -2    9.30    1.60
  -8 -14   2    8.80    1.50
   8 -14  -2   11.80    1.50
  -8  14   2    8.50    1.50
  -8  14   2    9.50    1.40
   8  14  -2   12.10    1.60
   8  14  -2   10.30    1.40
   7 -14  -2    1.70    1.00
   7 -14  -2    2.80    1.30
   7 -14  -2    3.00    0.90
  -7 -14   2    3.10    1.00
  -7  14   2    4.40    1.10
   7  14  -2    3.90    1.00
  -7  14   2    3.20    1.10
  -6 -14   2    4.30    1.00
   6 -14  -2    4.70    1.00
   6 -14  -2    7.20    1.50
   6 -14  -2    3.90    1.10
   6  14  -2    5.00    1.00
   6  14  -2    6.90    1.30
  -6  14   2    5.40    1.20
   6  14  -2    5.30    0.60
   5 -14  -2    7.80    1.10
   5 -14  -2    7.00    1.40
  -5 -14   2    9.50    1.30
   5 -14  -2    6.50    1.30
  -5  14   2    9.10    1.40
   5  14  -2    6.80    0.70
  -5  14   2    5.40    1.20
   5  14  -2    7.20    1.10
   5  14  -2    6.50    0.90
   4 -14  -2    2.60    0.70
   4 -14  -2    1.30    0.90
  -4 -14   2    2.20    0.80
   4 -14  -2    3.20    1.10
  -4  14   2    2.40    0.90
   4  14  -2    1.50    0.60
   4  14  -2    2.20    0.60
  -4  14   2    2.60    0.90
   4  14  -2    3.20    0.90
  -3 -14   2   -0.20    0.60
   3 -14  -2   -0.10    0.50
   3 -14  -2   -0.50    0.70
   3 -14  -2    0.10    0.80
   3  14  -2   -0.60    0.40
  -3  14   2   -0.40    0.60
   3  14  -2    0.90    0.70
   3  14  -2    0.10    0.50
  -3  14   2    0.80    0.70
  -2 -14   2   28.40    1.80
   2 -14  -2   26.70    1.90
   2 -14  -2   24.60    1.50
  -2  14   2   24.00    1.80
  -2  14   2   25.30    1.80
   2  14  -2   25.10    1.50
   2  14  -2   27.10    1.80
   1 -14  -2   10.50    1.40
  -1 -14   2   13.20    1.40
   1 -14  -2   10.50    1.10
   1  14  -2   12.70    1.40
  -1  14   2   12.80    1.30
  -1  14   2    9.20    1.20
   1  14  -2   10.20    1.10
   1  14  -2    9.00    1.10
   0 -14   2    3.40    0.90
   0 -14   2    4.00    0.90
   0 -14  -2    5.00    0.80
   0 -14  -2    4.00    1.00
   0  14  -2    4.00    0.70
   0  14   2    3.30    0.80
   0  14   2    2.90    0.90
   0  14  -2    3.80    0.90
   0  14  -2    4.90    0.90
   1 -14   2    3.00    0.90
  -1 -14  -2    3.30    1.00
   1 -14   2    4.70    0.90
   1  14   2    3.60    0.80
  -1  14  -2    4.40    0.80
  -1  14  -2    4.00    1.00
   1  14   2    4.00    0.90
  -1  14  -2    0.60    0.60
  -2 -14  -2    2.60    0.90
   2 -14   2    2.40    0.80
   2 -14   2    2.40    0.90
   2  14   2    3.10    0.80
  -2  14  -2    2.80    0.70
  -2  14  -2    1.90    0.80
   2  14   2    2.80    0.70
  -2  14  -2    2.00    0.70
   3 -14   2   18.30    1.70
   3 -14   2   19.20    1.90
  -3 -14  -2   22.80    1.80
   3  14   2   16.50    1.20
  -3  14  -2   18.60    1.70
   3  14   2   18.90    1.70
  -3  14  -2   17.70    1.50
   3  14   2   20.50    1.60
  -4 -14  -2    3.80    1.10
   4 -14   2    2.30    1.00
   4 -14   2    1.80    0.90
  -4  14  -2    1.30    0.70
  -4  14  -2    2.90    0.90
  -4  14  -2    4.00    0.90
   4  14   2    2.20    0.90
   4  14   2    2.10    0.60
   4  14   2    3.10    0.80
  -5 -14  -2    0.20    0.70
   5 -14   2    0.60    1.00
   5 -14   2    0.50    0.90
   5  14   2    1.10    0.40
   5  14   2    0.60    0.60
  -5  14  -2    0.40    0.80
   5  14   2    0.80    0.90
  -5  14  -2    0.30    0.80
  -6 -14  -2   15.10    1.80
   6 -14   2   16.40    1.90
   6 -14   2   14.90    1.90
  -6  14  -2   12.60    1.50
   6  14   2   17.30    1.90
   6  14   2   13.40    0.90
  -6  14  -2   20.10    1.90
   7 -14   2    8.60    1.60
   7 -14   2    7.50    1.50
  -7 -14  -2   10.80    1.70
  -7  14  -2    7.80    1.30
  -7  14  -2   10.10    1.50
   7  14   2    9.90    1.60
  -8 -14  -2    5.10    1.40
   8 -14   2    2.60    1.30
   8 -14   2    5.10    1.50
   8  14   2    3.90    1.20
   8  14   2    4.30    1.20
  -8  14  -2    4.30    1.20
  -8  14  -2    4.10    1.10
   9 -14   2    1.10    1.30
  -9 -14  -2    0.10    0.90
   9 -14   2   -0.10    1.10
  -9  14  -2    0.00    0.90
   9  14   2    0.70    0.90
   9  14   2    0.10    1.40
  -9  14  -2    0.60    1.00
   9  14   2    0.70    1.00
   9 -15  -2    2.70    1.40
   9 -15  -2    1.70    1.20
   9  15  -2    2.70    1.10
   9  15  -2    4.10    1.20
  -9  15   2    1.80    1.20
   8 -15  -2   -0.20    1.20
   8 -15  -2   -0.70    1.00
   8  15  -2    0.40    0.80
   8  15  -2    0.40    0.80
  -8  15   2   -0.10    0.90
  -7 -15   2    6.80    1.30
   7 -15  -2    7.40    1.40
   7 -15  -2    8.60    1.70
  -7  15   2    5.90    1.40
   7  15  -2    6.70    0.60
   7  15  -2    8.20    1.40
  -6 -15   2    1.70    0.90
   6 -15  -2    0.40    1.10
   6 -15  -2    0.80    1.00
   6  15  -2    1.50    0.90
   6  15  -2    0.40    0.40
  -6  15   2    0.80    0.80
  -5 -15   2    3.60    1.00
   5 -15  -2    4.00    1.20
   5 -15  -2    1.50    1.00
   5  15  -2    3.20    0.90
   5  15  -2    2.90    0.60
  -5  15   2    3.40    1.10
  -4 -15   2    4.80    1.00
   4 -15  -2    5.20    1.20
   4 -15  -2    5.80    1.30
   4  15  -2    5.50    1.10
  -4  15   2    3.90    1.00
  -4  15   2    3.90    1.00
   4  15  -2    3.80    0.70
   3 -15  -2   10.90    1.50
   3 -15  -2   12.20    1.70
  -3 -15   2   16.50    1.70
   3  15  -2   11.10    1.10
  -3  15   2   14.80    1.60
  -3  15   2   10.00    1.40
   3  15  -2   13.20    1.50
   3  15  -2   11.90    1.20
  -2 -15   2    2.20    0.80
   2 -15  -2    1.20    0.80
   2  15  -2    1.70    0.60
  -2  15   2    1.70    0.80
  -2  15   2    2.90    0.90
   2  15  -2    1.40    0.80
   2  15  -2    1.60    0.60
  -1 -15   2    3.80    0.90
   1 -15  -2    2.20    1.00
  -1  15   2    3.70    0.90
   1  15  -2    4.30    1.00
  -1  15   2    3.00    0.90
   1  15  -2    4.10    0.80
   1  15  -2    4.10    0.80
   0 -15  -2   19.30    1.90
   0 -15   2   19.50    1.60
   0  15  -2   19.50    1.40
   0  15   2   21.90    1.60
   0  15  -2   18.00    1.70
   0  15   2   18.90    1.60
   1 -15   2   23.90    1.80
   1 -15   2   21.70    1.80
  -1 -15  -2   21.60    1.80
   1  15   2   21.90    1.70
  -1  15  -2   18.30    1.40
   1  15   2   19.60    1.50
  -1  15  -2   18.90    1.70
   2 -15   2    5.70    1.10
   2 -15   2    6.70    1.30
  -2 -15  -2    7.30    1.30
  -2  15  -2    2.40    0.80
   2  15   2    4.80    1.00
   2  15   2    7.50    0.90
  -2  15  -2    6.70    1.00
  -2  15  -2    7.10    1.20
   3 -15   2    1.40    0.80
  -3 -15  -2    2.10    0.90
   3 -15   2    0.00    0.80
  -3  15  -2    1.30    0.70
  -3  15  -2    0.90    0.70
  -3  15  -2   -0.40    0.80
   3  15   2   -0.30    0.70
   3  15   2    0.50    0.50
   3  15   2    0.90    0.80
   4 -15   2    2.60    1.10
  -4 -15  -2    3.10    1.00
  -4  15  -2    5.00    1.10
  -4  15  -2    3.20    1.00
  -4  15  -2    3.50    0.90
   4  15   2    1.60    1.00
   4  15   2    3.70    0.70
   4  15   2    4.60    1.00
   5 -15   2   18.60    2.10
   5 -15   2   14.70    1.80
  -5 -15  -2   14.00    1.80
   5  15   2   15.90    1.90
   5  15   2   14.30    1.10
   5  15   2   15.20    1.50
  -5  15  -2   14.40    1.60
  -5  15  -2   14.30    1.70
   6 -15   2    1.70    1.10
  -6 -15  -2    1.50    1.00
   6 -15   2    2.80    1.30
  -6  15  -2    1.60    1.00
  -6  15  -2    1.50    0.90
   6  15   2    2.00    0.50
   6  15   2    2.50    1.00
   7 -15   2    0.60    1.10
   7 -15   2    1.50    1.20
  -7 -15  -2    2.70    1.20
  -7  15  -2    0.90    0.90
  -7  15  -2    1.90    1.00
   7  15   2    0.80    0.90
   7  15   2    2.40    0.40
   8 -15   2    1.50    1.30
  -8 -15  -2    2.20    1.20
   8 -15   2    1.90    1.30
  -8  15  -2    1.60    1.00
  -8  15  -2    3.40    1.20
   8  15   2    2.00    1.10
   8  15   2    1.70    1.00
   8 -16  -2    5.70    1.50
   8 -16  -2    7.30    1.70
   8  16  -2    2.90    1.20
   8  16  -2    4.90    1.20
  -8  16   2    2.40    1.30
   7 -16  -2   10.10    1.80
   7 -16  -2    7.00    1.50
   7  16  -2    8.60    1.50
  -7  16   2    6.00    1.50
   7  16  -2    6.80    1.30
   7  16  -2    8.30    0.70
   6 -16  -2    6.30    1.40
   6  16  -2    7.00    1.30
  -6  16   2    5.30    1.20
   6  16  -2    6.70    0.80
  -5 -16   2    5.10    1.30
   5 -16  -2    3.30    1.20
   5 -16  -2    3.90    1.20
  -5  16   2    3.50    1.00
   5  16  -2    4.50    1.10
   5  16  -2    4.20    0.70
   4 -16  -2    2.90    1.10
  -4 -16   2    3.60    1.00
   4 -16  -2    4.10    1.30
  -4  16   2    2.50    1.10
   4  16  -2    2.30    1.00
  -4  16   2    2.50    1.00
   4  16  -2    3.40    0.70
   3 -16  -2    0.50    0.90
  -3 -16   2    0.70    0.70
   3 -16  -2    0.40    0.80
  -3  16   2    0.50    0.80
  -3  16   2    0.20    0.70
   3  16  -2    0.50    0.60
   3  16  -2    1.50    0.90
  -2 -16   2    1.30    0.80
   2 -16  -2    2.30    1.10
   2  16  -2    0.40    0.80
  -2  16   2    2.40    1.00
  -2  16   2    0.60    0.70
   2  16  -2    2.30    0.70
  -1 -16   2   12.80    1.50
   1 -16  -2   17.90    2.00
   1  16  -2   11.60    1.30
  -1  16   2   10.60    1.40
  -1  16   2   12.00    1.40
   1  16  -2   10.80    1.40
   0 -16   2    3.50    0.90
   0 -16  -2    3.50    1.10
   0  16  -2    2.70    0.90
   0  16  -2    1.80    0.90
   0  16   2    3.20    1.00
   0  16  -2    3.00    0.80
   0  16   2    3.70    0.90
   1 -16   2   11.20    1.50
   1 -16   2   13.80    1.60
  -1 -16  -2   11.90    1.60
  -1  16  -2   14.60    1.40
   1  16   2   11.30    1.40
  -1  16  -2   12.80    1.60
   1  16   2   13.10    1.40
  -1  16  -2   10.70    1.40
   2 -16   2    9.60    1.40
   2 -16   2   10.40    1.40
  -2 -16  -2    6.90    1.30
   2  16   2    8.60    1.10
  -2  16  -2    8.70    1.40
  -2  16  -2    9.30    1.30
   2  16   2   10.10    1.40
  -2  16  -2    6.30    1.10
   3 -16   2   43.20    2.60
  -3 -16  -2   38.10    2.50
   3 -16   2   40.70    2.60
   3  16   2   45.00    2.40
  -3  16  -2   43.30    2.50
   3  16   2   43.20    2.70
  -3  16  -2   40.10    2.20
   3  16   2   40.20    2.00
  -3  16  -2   34.50    2.40
   4 -16   2    1.20    1.00
  -4 -16  -2    2.10    1.00
   4  16   2    3.70    1.00
  -4  16  -2    4.60    1.20
   4  16   2    2.50    1.10
  -4  16  -2    3.10    0.90
   4  16   2    2.70    0.70
  -4  16  -2    2.10    1.20
   5 -16   2    6.40    1.40
  -5 -16  -2    5.30    1.40
  -5  16  -2    4.60    1.20
   5  16   2    5.90    1.20
  -5  16  -2    5.00    1.10
   5  16   2    6.60    1.40
   5  16   2    4.90    0.70
   6 -16   2    2.60    1.40
   6 -16   2   -0.40    1.00
  -6 -16  -2    0.90    1.00
  -6  16  -2    0.90    1.00
   6  16   2    0.60    0.40
  -6  16  -2    0.90    0.90
   6  16   2    0.90    1.00
  -7 -16  -2   11.80    1.90
   7 -16   2   11.30    1.80
   7 -16   2    6.30    1.70
   7  16   2    9.20    0.70
   7  16   2    9.80    1.70
  -7  16  -2    9.40    1.50
  -7  16  -2   10.10    1.60
   6 -17  -2    3.20    1.30
   6  17  -2    2.60    0.60
  -6  17   2    3.50    1.20
   6  17  -2    4.00    1.10
   5 -17  -2    3.60    1.40
   5 -17  -2    5.00    1.40
  -5  17   2    3.30    1.20
   5  17  -2    4.30    0.70
   5  17  -2    4.50    1.20
   4 -17  -2   -0.80    1.00
   4 -17  -2    0.20    1.00
  -4  17   2    0.90    0.90
   4  17  -2   -1.00    0.80
  -4  17   2    0.20    0.90
   4  17  -2    0.20    0.50
   3 -17  -2   17.60    2.10
  -3  17   2   14.50    1.70
   3  17  -2   17.40    1.40
  -3  17   2   16.40    1.80
   3  17  -2   14.80    1.70
  -2 -17   2   13.20    2.10
   2 -17  -2   10.20    1.70
   2  17  -2   11.40    1.30
  -2  17   2   11.60    1.60
  -2  17   2   13.50    1.60
   2  17  -2   12.90    1.70
  -1 -17   2    2.10    0.90
   1 -17  -2    1.40    1.00
  -1  17   2    1.70    0.90
   1  17  -2    1.80    0.70
   1  17  -2    0.50    0.80
  -1  17   2    0.30    0.70
   0 -17   2   12.80    1.60
   0 -17  -2   18.20    2.10
   0  17  -2   18.40    1.90
   0  17  -2   12.50    1.40
   0  17   2   18.20    1.70
   0  17   2   16.00    1.70
   1 -17   2   10.30    1.50
  -1 -17  -2    9.70    1.60
   1  17   2    8.90    1.40
  -1  17  -2   10.20    1.40
  -1  17  -2   10.20    1.60
   1  17   2    7.80    1.20
   2 -17   2    7.10    1.40
   2 -17   2    6.40    1.30
  -2 -17  -2    7.70    1.50
   2  17   2    6.50    1.20
  -2  17  -2    3.50    1.00
   2  17   2    7.90    1.10
   2  17   2    5.00    1.30
  -2  17  -2    4.80    1.20
  -3 -17  -2    9.40    1.60
   3 -17   2    7.40    1.40
   3 -17   2    6.70    1.30
  -3  17  -2    5.50    1.20
  -3  17  -2    6.80    1.40
   3  17   2    7.70    1.30
   3  17   2    7.80    1.00
   3  17   2    7.40    1.40
  -4 -17  -2    1.60    1.10
   4 -17   2    0.10    1.10
   4 -17   2    0.60    1.00
   4  17   2    0.90    0.60
  -4  17  -2    0.80    1.10
   4  17   2    1.30    0.90
  -4  17  -2    0.90    1.00
   4  17   2    1.30    1.00
   5 -17   2   16.90    2.00
  -5 -17  -2   15.70    2.00
  -5  17  -2   15.60    1.90
  -5  17  -2   17.30    1.80
   5  17   2   15.80    1.20
   5  17   2   18.70    2.20
   6 -17   2    6.20    1.50
  -6 -17  -2    4.40    1.40
   6  17   2    3.90    1.40
   6  17   2    2.50    0.60
  -6  17  -2    5.60    1.30
  -6  17  -2    3.60    1.20
   5 -18  -2   10.80    1.90
   5 -18  -2   10.60    1.90
  -5  18   2    8.30    1.60
   5  18  -2   11.10    1.60
   5  18  -2   10.60    1.10
   4 -18  -2   10.10    1.80
   4  18  -2   12.10    1.70
  -4  18   2   11.20    1.60
  -4  18   2    9.00    1.90
   4  18  -2   11.80    1.20
   3 -18  -2    2.80    1.30
   3  18  -2    3.00    0.80
   3  18  -2    1.50    1.10
  -3  18   2    1.00    0.90
  -3  18   2    2.70    1.20
   2 -18  -2    1.70    1.20
  -2  18   2    0.80    0.90
  -2  18   2    0.20    0.80
   2  18  -2    0.20    0.70
   2  18  -2    0.90    1.00
   1 -18  -2   26.10    2.30
   1  18  -2   24.00    1.80
  -1  18   2   21.70    2.00
   1  18  -2   25.50    2.10
  -1  18   2   17.80    1.80
   0 -18  -2    1.90    1.10
   0  18   2    2.10    1.00
   0  18  -2    0.40    0.80
   0  18  -2    1.20    1.00
   0  18   2    1.30    0.80
  -1 -18  -2    8.60    1.60
  -1  18  -2    5.80    1.30
  -1  18  -2    8.00    1.30
   1  18   2    6.80    1.10
   1  18   2    7.00    1.30
  -2 -18  -2    4.50    1.30
   2 -18   2    2.50    1.20
   2  18   2    3.50    0.90
  -2  18  -2    3.80    1.10
  -2  18  -2    3.20    1.20
   2  18   2    2.40    1.10
   2  18   2    3.90    1.20
   3 -18   2   20.60    2.20
   3 -18   2   19.90    2.90
  -3 -18  -2   22.10    2.40
   3  18   2   23.80    1.70
  -3  18  -2   26.20    2.30
   3  18   2   24.80    2.10
   3  18   2   25.80    2.50
  -3  18  -2   26.30    2.20
  -4 -18  -2    2.30    1.10
   4 -18   2    2.70    1.30
   4 -18   2    1.70    1.30
   4  18   2    3.50    1.30
  -4  18  -2    2.70    1.20
   4  18   2    2.40    0.70
   4  18   2    1.40    1.00
   2 -19  -2   15.80    2.00
  -2  19   2   19.50    2.10
   2  19  -2   16.60    1.60
  -2  19   2   17.20    1.90
   2  19  -2   15.40    1.90
   1 -19  -2    0.00    1.10
  -1  19   2    2.60    1.00
  -1  19   2    3.20    1.20
   1  19  -2    2.40    0.90
   1  19  -2    1.70    1.10
   0 -19  -2    4.30    1.30
   0  19  -2    3.60    1.20
   0  19  -2    3.30    1.00
   0  19   2    2.40    0.90
   0  19   2    3.50    1.20
  -1 -19  -2   36.00    2.80
   1  19   2   36.00    2.30
  -1  19  -2   39.80    2.50
  -1  19  -2   35.60    2.60
   1  19   2   36.30    2.50
   1  19   2   31.10    2.70
  14   0  -3    2.20    1.00
  14   0  -3    1.90    1.10
  13   0  -3    0.90    0.90
  13   0  -3    0.90    0.70
  13   0  -3    2.20    1.10
  12   0  -3    0.50    0.60
  12   0  -3    1.00    0.80
  12   0  -3    0.20    0.80
  12   0  -3   -0.20    0.70
  11   0  -3   11.60    1.50
  11   0  -3   11.80    1.40
  11   0  -3   11.10    1.20
  11   0  -3   12.40    1.50
  10   0  -3    9.90    1.30
  10   0  -3   10.00    1.10
  10   0  -3    9.80    1.10
  10   0  -3    9.60    1.30
   9   0  -3    1.20    0.60
   9   0  -3    2.10    0.60
   9   0  -3    1.70    0.80
   9   0  -3    1.50    0.70
   8   0  -3    7.20    0.90
   8   0  -3    6.60    0.80
   8   0  -3    5.80    0.90
   8   0  -3    7.40    1.00
   8   0  -3    6.10    0.70
   7   0  -3  165.98    4.90
   7   0  -3  162.78    4.90
   7   0  -3  170.08    5.10
   7   0  -3  164.08    4.90
   7   0  -3  159.08    5.10
   6   0  -3    1.50    0.50
   6   0  -3    2.30    0.50
   6   0  -3    1.30    0.40
   6   0  -3    1.40    0.50
   6   0  -3    1.60    0.40
   5   0  -3  380.46   10.30
   5   0  -3  373.06   10.30
   5   0  -3  372.56   10.20
   5   0  -3  384.86   10.20
   5   0  -3  382.36   10.40
   4   0  -3    0.30    0.40
   4   0  -3    0.10    0.30
  -4   0   3    0.50    0.30
   4   0  -3    0.00    0.20
   4   0  -3    0.40    0.30
   4   0  -3    0.00    0.20
   4   0  -3    0.00    0.10
  -3   0   3    9.40    0.60
   3   0  -3    9.90    0.60
  -3   0   3    9.20    0.40
   3   0  -3   10.20    0.60
   3   0  -3    9.40    0.60
   3   0  -3    9.50    0.40
   3   0  -3    9.50    0.60
   2   0  -3   21.80    0.90
   2   0  -3   22.00    0.90
   2   0  -3   20.40    0.90
  -2   0   3   21.60    0.70
   2   0  -3   22.50    0.90
  -2   0   3   23.00    0.90
  -2   0   3   22.70    0.80
   2   0  -3   22.50    0.90
  -1   0   3 5179.88  131.39
   1   0  -3 5219.98  131.59
   1   0  -3 5154.78  131.19
   1   0  -3 4910.51  131.69
  -1   0   3 5029.00  131.49
   1   0  -3 4849.41  131.19
   0   0   3   -1.00    0.30
   0   0   3   -0.10    0.30
   0   0   3   -0.70    0.30
   0   0  -3   -1.00    0.30
   0   0  -3   -0.60    0.30
   0   0  -3   -0.90    0.20
   0   0  -3   -0.80    0.20
   0   0  -3   -0.30    0.30
   1   0   3 9598.84  253.67
   1   0   3 9658.13  253.27
  -1   0  -3 9869.61  253.37
   1   0   3 9999.00  253.77
   2   0   3   51.99    1.80
  -2   0  -3   55.49    1.80
  -2   0  -3   55.89    1.90
  -2   0  -3   55.39    1.50
   2   0   3   56.39    1.50
  -2   0  -3   55.49    1.80
   2   0   3   55.19    1.90
  -2   0  -3   54.19    1.80
   2   0   3   55.29    2.00
  -3   0  -3   89.19    2.50
   3   0   3   88.49    2.80
  -3   0  -3   91.19    2.80
   3   0   3   90.09    2.90
  -3   0  -3   92.09    3.00
  -3   0  -3   93.69    2.80
   3   0   3   89.89    3.00
   4   0   3   90.79    3.20
  -4   0  -3   93.59    2.70
  -4   0  -3   92.89    3.20
   4   0   3   94.79    3.00
  -4   0  -3   98.19    3.00
  -4   0  -3   91.29    2.90
   4   0   3   96.89    3.00
   5   0   3   57.79    2.30
   5   0   3   59.89    2.50
  -5   0  -3   64.99    2.30
   5   0   3   61.89    2.20
   5   0   3   65.49    2.30
  -5   0  -3   60.09    1.90
  -5   0  -3   57.99    2.10
   6   0   3   29.60    1.60
  -6   0  -3   31.20    1.40
  -6   0  -3   29.90    1.20
  -6   0  -3   29.90    1.50
   6   0   3   28.30    1.40
   6   0   3   29.50    1.40
   6   0   3   29.30    1.70
   7   0   3  227.88    7.00
   7   0   3  224.68    6.60
  -7   0  -3  224.58    6.50
   7   0   3  229.38    7.10
   7   0   3  226.98    6.60
   8   0   3   12.90    1.40
   8   0   3    8.10    1.20
   8   0   3   11.00    1.10
   8   0   3    9.80    1.00
   8   0   3    9.50    1.00
   9   0   3   12.10    1.10
   9   0   3   12.80    1.50
   9   0   3   10.90    1.20
   9   0   3   10.50    1.10
   9   0   3   11.90    1.40
  10   0   3    6.00    0.90
  10   0   3    4.90    0.90
  10   0   3    4.40    1.30
  10   0   3    3.80    1.00
  11   0   3    2.40    1.00
  11   0   3    0.50    0.90
  11   0   3    1.20    0.70
  11   0   3    0.90    0.70
  12   0   3   -0.20    0.70
  12   0   3   -0.40    0.90
  12   0   3    0.20    0.60
  12   0   3    2.00    1.10
  13   0   3   22.80    1.80
  13   0   3   19.60    2.30
  13   0   3   19.70    2.20
  14  -1  -3    7.50    1.60
  14  -1  -3    3.60    1.00
  14  -1  -3    4.20    1.20
  14   1  -3    4.20    1.30
  14   1  -3    4.50    1.20
  13  -1  -3    9.90    1.50
  13  -1  -3    9.30    1.60
  13  -1  -3   10.90    1.30
  13   1  -3    9.70    1.60
  13   1  -3   11.40    1.60
  13   1  -3   12.90    1.50
  12  -1  -3   13.20    1.40
  12  -1  -3   12.40    1.50
  12  -1  -3   13.90    1.70
  12  -1  -3   13.10    1.60
  12   1  -3   14.00    1.60
  12   1  -3   13.80    1.20
  12   1  -3   11.50    1.40
  12   1  -3   12.20    1.60
  11  -1  -3   40.00    2.20
  11  -1  -3   40.00    2.30
  11  -1  -3   34.00    2.30
  11  -1  -3   39.90    2.00
  11   1  -3   43.90    2.30
  11   1  -3   45.00    2.70
  11   1  -3   38.60    1.90
  11   1  -3   42.40    2.30
  10  -1  -3   25.30    1.70
  10  -1  -3   25.50    1.60
  10  -1  -3   23.90    1.80
  10  -1  -3   24.90    1.70
  10   1  -3   24.30    1.80
  10   1  -3   23.50    1.80
  10   1  -3   26.20    1.40
  10   1  -3   26.20    1.60
   9  -1  -3   17.80    1.30
   9  -1  -3   17.30    1.40
   9  -1  -3   16.00    1.30
   9  -1  -3   13.60    1.40
   9   1  -3   15.40    1.10
   9   1  -3   16.10    1.50
   9   1  -3   14.20    1.30
   9   1  -3   15.10    1.20
   8  -1  -3   10.80    1.00
   8  -1  -3    8.10    0.90
   8  -1  -3    9.50    1.10
   8  -1  -3    8.40    1.00
  -8   1   3   10.00    1.10
   8   1  -3    8.30    1.00
   8   1  -3   11.60    0.80
   8   1  -3   10.30    0.90
   8   1  -3   10.00    1.00
   8   1  -3   10.00    1.10
   7  -1  -3    4.40    0.60
   7  -1  -3    3.20    0.70
   7  -1  -3    4.80    0.70
   7  -1  -3    4.60    0.70
   7  -1  -3    3.90    0.60
   7   1  -3    5.00    0.60
   7   1  -3    4.50    0.70
  -7   1   3    6.10    0.80
   7   1  -3    5.70    0.70
   7   1  -3    5.80    0.70
   7   1  -3    4.80    0.60
   7   1  -3    5.80    0.40
   6  -1  -3   21.30    1.10
   6  -1  -3   23.00    1.20
   6  -1  -3   21.70    1.20
   6  -1  -3   20.80    1.30
   6  -1  -3   20.40    1.10
   6   1  -3   25.80    0.80
   6   1  -3   26.10    1.20
  -6   1   3   22.60    1.30
   6   1  -3   24.60    1.10
   6   1  -3   25.50    1.30
   6   1  -3   22.50    1.10
   6   1  -3   20.60    1.20
   5  -1  -3  669.23   17.80
   5  -1  -3  685.53   17.90
   5  -1  -3  659.53   17.90
   5  -1  -3  676.53   18.00
   5  -1  -3  682.43   17.90
   5   1  -3  692.33   18.00
   5   1  -3  682.03   18.20
   5   1  -3  699.43   18.00
  -5   1   3  669.13   18.00
  -5   1   3  704.23   18.30
   5   1  -3  691.43   18.00
   5   1  -3  644.94   18.20
   4  -1  -3   15.90    0.90
   4  -1  -3   14.10    0.70
   4  -1  -3   13.60    0.80
   4  -1  -3   17.30    0.90
   4  -1  -3   15.40    0.90
   4   1  -3   16.40    0.90
   4   1  -3   18.20    0.80
  -4   1   3   13.10    0.90
   4   1  -3   16.40    0.80
   4   1  -3   15.20    0.90
  -4   1   3   15.00    0.90
   4   1  -3   17.10    0.70
   3  -1  -3   80.09    2.40
  -3  -1   3   74.69    2.20
   3  -1  -3   74.79    2.40
  -3  -1   3   76.79    2.30
   3  -1  -3   74.09    2.20
   3  -1  -3   78.79    2.50
   3  -1  -3   76.19    2.10
  -3  -1   3   80.19    2.10
   3  -1  -3   80.79    2.40
   3   1  -3   77.69    2.40
  -3   1   3   80.99    2.20
  -3   1   3   76.09    2.40
  -3   1   3   79.29    2.50
   3   1  -3   79.59    2.40
   3   1  -3   79.29    2.40
   3   1  -3   77.09    2.20
   3   1  -3   78.39    2.40
   2  -1  -3   55.39    1.80
   2  -1  -3   54.09    1.70
   2  -1  -3   56.69    1.80
   2  -1  -3   56.19    1.60
   2  -1  -3   53.79    1.80
  -2  -1   3   60.79    1.70
  -2  -1   3   57.09    1.80
  -2   1   3   56.99    1.70
   2   1  -3   56.49    1.80
  -2   1   3   54.89    1.80
   2   1  -3   53.29    1.70
   2   1  -3   56.59    1.70
   2   1  -3   56.99    1.80
   2   1  -3   56.19    1.80
  -1  -1   3   59.99    1.90
   1  -1  -3   60.69    1.70
   1  -1  -3   58.39    1.90
  -1  -1   3   59.39    1.70
   1  -1  -3   57.69    1.80
  -1  -1   3   59.59    1.90
   1  -1  -3   58.19    1.80
  -1   1   3   57.19    1.80
   1   1  -3   55.49    1.80
  -1   1   3   57.79    1.80
   1   1  -3   56.79    1.50
   1   1  -3   55.99    1.60
   1   1  -3   57.49    1.70
   1   1  -3   56.19    1.80
  -1   1   3   55.59    1.70
   1   1  -3   52.69    1.70
   1   1  -3   53.59    1.60
   0  -1   3    1.00    0.20
   0  -1   3    1.60    0.30
   0  -1   3    1.40    0.30
   0  -1  -3    1.80    0.30
   0  -1  -3    1.40    0.30
   0  -1  -3    2.00    0.30
   0  -1  -3    1.50    0.30
   0  -1   3    1.30    0.40
   0  -1  -3    1.80    0.20
   0   1   3    1.60    0.20
   0   1  -3    1.20    0.30
   0   1  -3    1.80    0.30
   0   1   3    1.50    0.30
   0   1   3    0.90    0.30
   0   1  -3    2.30    0.30
   0   1  -3    1.10    0.20
  -1  -1  -3 1254.87   32.90
   1  -1   3 1261.77   32.80
  -1  -1  -3 1200.78   32.80
   1  -1   3 1296.57   32.80
  -1  -1  -3 1262.67   33.10
  -1  -1  -3 1273.67   33.00
   1  -1   3 1290.47   32.80
   1   1   3 1250.07   32.20
   1   1   3 1235.08   32.20
  -1   1  -3 1138.69   32.30
  -1   1  -3 1290.57   32.20
  -1   1  -3 1226.08   32.60
   1   1   3 1257.37   32.10
  -1   1  -3 1262.77   33.10
  -1   1  -3 1250.77   32.30
  -2  -1  -3  414.46   11.10
   2  -1   3  417.66   11.30
  -2  -1  -3  427.26   11.10
  -2  -1  -3  418.86   11.20
  -2  -1  -3  410.86   11.00
   2  -1   3  413.76   11.20
   2  -1   3  417.76   11.20
   2   1   3  385.26   10.80
  -2   1  -3  398.46   10.80
  -2   1  -3  403.56   10.80
   2   1   3  417.16   11.00
  -2   1  -3  412.96   10.80
  -2   1  -3  394.66   10.60
   2   1   3  425.16   10.90
   3  -1   3  455.85   12.20
   3  -1   3  438.16   12.10
  -3  -1  -3  458.65   12.30
   3  -1   3  463.55   12.30
  -3  -1  -3  453.35   12.00
  -3  -1  -3  442.16   12.00
   3   1   3  436.66   12.20
  -3   1  -3  464.55   12.00
  -3   1  -3  459.25   11.80
  -3   1  -3  451.15   12.00
   3   1   3  434.66   12.00
   3   1   3  445.96   12.10
   3   1   3  453.15   11.60
   4  -1   3    6.50    0.80
   4  -1   3    4.90    0.60
   4  -1   3    5.30    0.60
   4  -1   3    5.10    0.70
  -4  -1  -3    5.40    0.60
  -4  -1  -3    5.10    0.50
  -4  -1  -3    4.50    0.70
   4   1   3    3.50    0.70
   4   1   3    4.30    0.50
   4   1   3    3.40    0.60
  -4   1  -3    4.00    0.50
  -4   1  -3    6.80    0.60
  -4   1  -3    4.40    0.40
   5  -1   3  153.88    4.50
   5  -1   3  144.49    4.80
  -5  -1  -3  146.99    4.40
  -5  -1  -3  151.78    4.50
   5  -1   3  151.18    4.70
  -5  -1  -3  146.49    4.80
   5  -1   3  151.38    4.50
   5   1   3  146.99    4.40
  -5   1  -3  154.68    4.50
  -5   1  -3  149.49    4.60
   5   1   3  145.79    4.50
   5   1   3  150.18    4.80
  -5   1  -3  150.88    4.30
  -6  -1  -3   38.90    2.00
   6  -1   3   40.90    1.70
  -6  -1  -3   40.00    1.60
   6  -1   3   43.60    2.10
   6  -1   3   42.20    2.00
   6  -1   3   42.10    1.80
  -6   1  -3   40.50    1.50
   6   1   3   36.00    1.70
   6   1   3   40.80    1.70
  -6   1  -3   48.00    1.80
  -6   1  -3   43.40    1.90
   6   1   3   43.70    2.00
   6   1   3   38.10    2.00
   7  -1   3   45.20    1.90
   7  -1   3   45.60    2.00
   7  -1   3   40.90    2.20
   7  -1   3   46.90    2.20
  -7   1  -3   51.09    2.20
   7   1   3   47.90    2.40
  -7   1  -3   46.90    2.00
  -7   1  -3   47.20    1.80
   7   1   3   47.70    1.90
   7   1   3   49.50    2.00
   7   1   3   47.90    2.30
   8  -1   3    2.30    0.60
   8  -1   3    1.10    0.60
   8  -1   3    2.20    0.60
   8  -1   3    4.40    0.90
   8  -1   3    2.60    0.80
   8   1   3    0.80    0.70
   8   1   3    4.00    0.70
   8   1   3    1.50    0.60
  -8   1  -3    1.30    0.50
   8   1   3    0.70    0.70
   9  -1   3   15.80    1.20
   9  -1   3   17.30    1.80
   9  -1   3   17.40    1.50
   9  -1   3   19.30    1.80
   9  -1   3   15.80    1.30
   9   1   3   12.40    1.50
   9   1   3   13.20    1.20
   9   1   3   15.60    1.60
   9   1   3   14.60    1.20
   9   1   3   14.80    1.20
  10  -1   3    1.70    0.80
  10  -1   3    3.60    0.80
  10  -1   3    3.90    1.10
  10  -1   3    4.90    1.20
  10   1   3    4.10    0.80
  10   1   3    2.70    1.10
  10   1   3    2.70    1.00
  10   1   3    4.30    0.90
  10   1   3    3.30    1.00
  11  -1   3    8.20    1.40
  11  -1   3    5.40    1.00
  11  -1   3    6.20    1.10
  11  -1   3    8.70    1.50
  11   1   3    8.00    1.00
  11   1   3    7.50    1.10
  11   1   3    6.30    1.30
  11   1   3    4.20    1.20
  12  -1   3    6.40    1.40
  12  -1   3    6.80    1.40
  12  -1   3    5.90    1.00
  12  -1   3    4.70    1.10
  12   1   3    6.10    1.40
  12   1   3    5.50    1.00
  12   1   3    6.10    1.40
  12   1   3    5.80    0.90
  13  -1   3   13.00    2.00
  13  -1   3   12.30    1.50
  13  -1   3   11.20    1.80
  13   1   3   13.10    1.90
  13   1   3   13.10    1.90
  14  -2  -3    7.10    1.50
  14  -2  -3    4.80    1.10
  14  -2  -3    5.90    1.30
  14   2  -3    6.00    1.40
  14   2  -3    8.40    1.70
  13  -2  -3    6.40    1.30
  13  -2  -3    5.10    1.30
  13  -2  -3    4.80    1.30
  13  -2  -3    6.80    1.20
  13   2  -3    7.70    1.40
  13   2  -3    7.30    1.40
  12  -2  -3    1.00    0.90
  12  -2  -3    1.30    0.90
  12  -2  -3    1.70    0.80
  12  -2  -3    1.20    0.80
  12   2  -3    2.20    0.70
  12   2  -3    0.80    0.80
  12   2  -3    2.50    1.00
  11  -2  -3   17.20    1.60
  11  -2  -3   18.20    1.50
  11  -2  -3   19.30    1.60
  11  -2  -3   20.50    1.80
  11   2  -3   16.30    1.70
  11   2  -3   18.30    1.50
  11   2  -3   16.70    1.60
  11   2  -3   19.00    1.20
  10  -2  -3    0.50    0.70
  10  -2  -3    0.30    0.70
  10  -2  -3    1.90    0.80
  10  -2  -3    0.40    0.70
  10   2  -3    0.50    0.70
  10   2  -3    1.00    0.80
  10   2  -3    1.40    0.60
 -10   2   3    0.90    0.70
  10   2  -3    0.80    0.50
   9  -2  -3   53.09    2.30
   9  -2  -3   53.49    2.40
   9  -2  -3   51.79    2.50
   9  -2  -3   50.59    2.30
   9   2  -3   49.60    2.40
  -9   2   3   51.09    2.40
   9   2  -3   54.89    2.50
   9   2  -3   53.29    2.30
   9   2  -3   53.59    2.00
   8  -2  -3    1.60    0.60
   8  -2  -3    3.90    0.80
   8  -2  -3    2.20    0.60
   8  -2  -3    3.10    0.70
   8   2  -3    1.60    0.70
   8   2  -3    2.00    0.30
   8   2  -3    2.20    0.50
   8   2  -3    2.10    0.60
   8   2  -3    0.80    0.50
  -8   2   3    1.70    0.60
   8   2  -3    2.40    0.40
   7  -2  -3    4.10    0.60
   7  -2  -3    4.60    0.70
   7  -2  -3    3.50    0.70
   7  -2  -3    4.60    0.70
   7  -2  -3    4.50    0.80
   7   2  -3    3.20    0.70
   7   2  -3    5.80    0.80
   7   2  -3    3.40    0.50
  -7   2   3    3.40    0.60
   7   2  -3    4.10    0.40
   7   2  -3    4.50    0.60
   7   2  -3    4.10    0.50
   6  -2  -3    1.90    0.50
   6  -2  -3    3.00    0.60
   6  -2  -3    2.10    0.40
   6  -2  -3    2.40    0.60
   6  -2  -3    2.70    0.60
   6   2  -3    3.20    0.60
   6   2  -3    3.00    0.40
   6   2  -3    1.50    0.50
   6   2  -3    2.60    0.30
   6   2  -3    2.90    0.50
   6   2  -3    2.60    0.40
  -6   2   3    1.80    0.40
  -6   2   3    3.80    0.60
   5  -2  -3   44.10    1.80
   5  -2  -3   43.90    1.80
   5  -2  -3   46.20    1.70
   5  -2  -3   44.80    1.70
   5  -2  -3   47.10    1.80
  -5   2   3   47.00    1.80
   5   2  -3   46.10    1.60
   5   2  -3   47.70    1.80
   5   2  -3   47.10    1.60
   5   2  -3   45.70    1.60
  -5   2   3   43.10    1.70
   5   2  -3   47.70    1.80
   4  -2  -3  103.59    3.30
   4  -2  -3  110.09    3.20
   4  -2  -3  105.89    3.40
   4  -2  -3  106.09    3.30
   4  -2  -3  110.09    3.20
   4   2  -3  111.59    3.30
   4   2  -3  112.69    3.20
   4   2  -3  110.49    3.10
  -4   2   3  107.79    3.30
  -4   2   3  107.59    3.40
   4   2  -3  112.29    3.10
   4   2  -3  102.09    3.30
   3  -2  -3  214.88    6.00
  -3  -2   3  224.78    5.90
   3  -2  -3  218.28    5.90
   3  -2  -3  219.48    5.90
   3  -2  -3  204.68    6.10
   3   2  -3  215.88    5.80
   3   2  -3  210.88    5.70
   3   2  -3  212.68    5.90
  -3   2   3  203.28    5.90
  -3   2   3  214.08    5.90
   3   2  -3  210.48    5.60
  -3   2   3  215.58    5.60
   3   2  -3  211.18    5.70
   3   2  -3  202.48    5.80
  -2  -2   3   17.10    0.80
   2  -2  -3   17.40    0.80
   2  -2  -3   18.10    0.70
   2  -2  -3   17.10    0.70
   2  -2  -3   16.80    0.90
  -2  -2   3   16.40    0.80
  -2   2   3   18.80    0.90
   2   2  -3   16.60    0.80
  -2   2   3   17.70    0.80
  -2   2   3   17.30    0.70
   2   2  -3   17.80    0.80
   2   2  -3   17.40    0.80
   2   2  -3   17.70    0.50
   2   2  -3   16.40    0.70
   2   2  -3   15.80    0.80
   1  -2  -3   18.70    0.70
  -1  -2   3   18.80    0.90
  -1  -2   3   18.40    0.80
   1  -2  -3   19.00    0.90
   1  -2  -3   18.80    0.80
  -1  -2   3   18.30    0.70
   1   2  -3   19.20    0.80
  -1   2   3   18.60    0.80
  -1   2   3   20.00    0.80
   1   2  -3   19.30    0.90
   1   2  -3   20.70    0.80
  -1   2   3   20.90    0.90
   1   2  -3   19.00    0.60
   1   2  -3   18.70    0.80
   0  -2   3  112.99    3.30
   0  -2   3  112.89    3.30
   0  -2  -3  114.29    3.30
   0  -2   3  111.99    3.00
   0  -2  -3  110.69    3.20
   0  -2  -3  107.69    3.30
   0  -2   3  113.29    3.20
   0  -2  -3  112.79    3.00
   0  -2  -3  113.99    3.20
   0   2   3  114.49    3.10
   0   2  -3  110.29    3.10
   0   2  -3  111.99    3.20
   0   2   3  111.79    3.20
   0   2   3  113.29    3.00
   0   2   3  109.49    3.20
   0   2  -3  110.59    3.20
   0   2  -3  112.89    3.20
   0   2  -3  109.49    3.50
   1  -2   3 1072.59   27.30
   1  -2   3 1083.19   27.40
  -1  -2  -3 1063.69   27.20
  -1  -2  -3  997.90   27.40
   1  -2   3 1089.99   27.40
  -1  -2  -3  949.40   27.20
  -1  -2  -3 1058.19   28.00
  -1  -2  -3 1075.89   27.30
   1   2   3 1046.30   27.30
   1   2   3 1040.70   27.50
   1   2   3 1069.39   27.40
  -1   2  -3 1053.39   27.40
  -1   2  -3 1033.50   27.60
  -1   2  -3 1056.59   27.50
  -1   2  -3 1086.59   27.90
   2  -2   3   50.39    1.80
   2  -2   3   50.09    1.80
  -2  -2  -3   54.09    1.90
  -2  -2  -3   51.19    1.70
  -2  -2  -3   51.99    1.70
   2  -2   3   50.29    1.90
  -2  -2  -3   53.09    1.60
  -2   2  -3   50.69    1.70
  -2   2  -3   49.00    1.60
   2   2   3   51.79    1.70
   2   2   3   53.99    1.90
   2   2   3   52.49    1.80
  -2   2  -3   51.99    1.80
  -2   2  -3   53.39    1.80
   3  -2   3   17.20    1.00
  -3  -2  -3   17.00    0.80
  -3  -2  -3   18.40    0.90
   3  -2   3   16.30    0.90
  -3  -2  -3   19.50    1.10
   3  -2   3   17.60    1.00
   3  -2   3   17.60    1.10
   3   2   3   18.50    0.60
  -3   2  -3   20.40    1.00
   3   2   3   18.70    0.90
   3   2   3   18.40    0.60
   3   2   3   18.20    1.00
  -3   2  -3   19.50    1.00
   3   2   3   18.70    1.10
  -3   2  -3   19.00    0.80
   4  -2   3   42.80    1.70
  -4  -2  -3   39.00    1.40
  -4  -2  -3   38.70    1.50
   4  -2   3   42.20    1.80
   4  -2   3   41.20    1.70
   4  -2   3   41.30    1.60
  -4  -2  -3   34.20    1.70
   4   2   3   35.50    1.70
   4   2   3   37.30    1.40
   4   2   3   36.70    1.60
  -4   2  -3   38.00    1.30
  -4   2  -3   38.60    1.50
  -4   2  -3   38.80    1.60
   5  -2   3   50.69    2.20
   5  -2   3   46.30    1.90
  -5  -2  -3   53.49    2.20
   5  -2   3   49.20    2.00
  -5  -2  -3   50.89    1.70
   5  -2   3   50.79    2.10
  -5   2  -3   50.59    1.90
  -5   2  -3   50.09    1.80
   5   2   3   52.29    2.20
   5   2   3   50.39    1.80
   5   2   3   53.39    2.00
  -5   2  -3   49.80    2.00
   6  -2   3   25.10    1.30
   6  -2   3   26.10    1.60
  -6  -2  -3   21.80    1.50
  -6  -2  -3   25.30    1.10
   6  -2   3   23.60    1.30
   6  -2   3   25.30    1.50
  -6   2  -3   25.20    1.30
  -6   2  -3   25.80    1.50
   6   2   3   22.20    1.50
   6   2   3   25.60    1.50
  -6   2  -3   26.40    1.20
   6   2   3   25.20    1.40
   6   2   3   22.60    1.20
   7  -2   3   61.89    2.40
   7  -2   3   63.19    2.70
   7  -2   3   61.89    2.50
  -7  -2  -3   61.69    2.80
   7  -2   3   66.29    2.80
   7   2   3   57.49    2.20
   7   2   3   57.59    2.60
  -7   2  -3   63.39    2.40
   7   2   3   56.69    2.60
  -7   2  -3   61.29    2.20
   7   2   3   61.89    2.40
  -7   2  -3   57.99    2.50
   8  -2   3   17.60    1.30
   8  -2   3   15.50    1.20
   8  -2   3   17.70    1.40
   8  -2   3   13.90    1.50
   8  -2   3   14.40    1.50
   8   2   3   17.60    1.10
  -8   2  -3   15.60    1.10
   8   2   3   17.80    1.60
   8   2   3   14.50    1.50
   8   2   3   19.00    1.20
   8   2   3   17.40    1.30
  -8   2  -3   13.80    1.40
   9  -2   3    1.30    0.60
   9  -2   3    1.50    0.90
   9  -2   3    1.60    0.80
   9  -2   3    2.00    0.70
   9  -2   3    1.60    0.60
   9   2   3    1.20    0.60
   9   2   3    1.70    0.50
   9   2   3    1.30    0.60
   9   2   3    1.40    0.80
   9   2   3    1.10    0.80
  10  -2   3    2.30    0.80
  10  -2   3    0.80    0.80
  10  -2   3    0.80    0.90
  10  -2   3    1.50    0.90
  10   2   3    2.50    1.00
  10   2   3    1.30    0.60
  10   2   3    1.20    0.60
  10   2   3    1.30    0.80
  10   2   3    1.30    0.60
  11  -2   3    4.60    1.00
  11  -2   3    6.40    1.20
  11  -2   3    3.20    1.10
  11  -2   3    6.10    1.30
  11   2   3    4.50    0.80
  11   2   3    3.90    1.20
  11   2   3    4.30    1.20
  11   2   3    5.20    0.90
  12  -2   3    2.90    1.10
  12  -2   3    2.50    1.20
  12  -2   3    3.10    1.20
  12  -2   3    4.40    1.00
  12   2   3    4.00    0.80
  12   2   3    4.90    1.30
  12   2   3    5.00    1.30
  13  -2   3    0.10    0.90
  13  -2   3   -1.90    0.90
  13  -2   3   -0.60    1.00
  13   2   3    0.50    0.90
  13   2   3    0.60    1.00
  14  -3  -3    0.20    0.90
  14  -3  -3    2.00    1.00
  14  -3  -3    1.60    1.10
  14   3  -3    1.70    1.10
  14   3  -3    2.30    1.10
  13  -3  -3    0.20    0.80
  13  -3  -3    1.60    0.90
  13  -3  -3    2.50    1.10
  13  -3  -3    1.10    1.00
  13   3  -3   -0.90    0.80
  13   3  -3    1.50    1.00
  12  -3  -3    1.10    1.00
  12  -3  -3    2.40    0.90
  12  -3  -3    3.60    1.00
  12  -3  -3    1.70    0.90
  12   3  -3    2.20    1.00
  12   3  -3    2.00    1.00
  11  -3  -3    0.50    0.70
  11  -3  -3    0.00    0.80
  11  -3  -3    0.20    0.70
  11  -3  -3    0.10    0.70
  11   3  -3   -0.20    0.80
 -11   3   3   -0.30    0.60
  11   3  -3    1.30    0.80
  11   3  -3    0.00    0.60
  11   3  -3    0.40    0.40
  10  -3  -3    4.00    1.00
  10  -3  -3    4.40    0.90
  10  -3  -3    5.80    1.00
  10  -3  -3    4.70    1.00
  10   3  -3    4.80    1.00
  10   3  -3    4.10    0.60
 -10   3   3    4.90    0.90
  10   3  -3    5.20    1.00
  10   3  -3    4.30    0.80
   9  -3  -3   13.90    1.30
   9  -3  -3   12.80    1.40
   9  -3  -3   11.80    1.30
   9  -3  -3   11.10    1.20
   9   3  -3   14.10    1.20
   9   3  -3   14.60    1.40
   9   3  -3   15.30    1.40
   9   3  -3   14.50    0.90
  -9   3   3   15.10    1.30
   8  -3  -3   15.80    1.20
   8  -3  -3   19.60    1.30
   8  -3  -3   18.10    1.30
   8  -3  -3   16.20    1.40
   8   3  -3   20.20    1.40
   8   3  -3   18.50    0.90
   8   3  -3   19.30    0.90
   8   3  -3   19.30    1.20
   8   3  -3   18.60    1.30
   8   3  -3   16.70    0.90
  -8   3   3   20.10    1.40
   7  -3  -3    1.70    0.50
   7  -3  -3    1.60    0.50
   7  -3  -3    1.30    0.60
   7  -3  -3    1.60    0.60
   7   3  -3    1.70    0.30
   7   3  -3    1.20    0.30
   7   3  -3    1.40    0.30
   7   3  -3    0.80    0.50
   7   3  -3    1.70    0.60
   7   3  -3    1.90    0.50
  -7   3   3    2.40    0.60
   6  -3  -3   17.50    1.20
   6  -3  -3   15.60    1.00
   6  -3  -3   15.70    1.00
   6  -3  -3   15.90    1.00
   6  -3  -3   18.40    1.20
   6   3  -3   17.40    1.10
  -6   3   3   18.20    1.20
   6   3  -3   17.30    0.80
   6   3  -3   16.90    1.10
   6   3  -3   16.10    0.80
  -6   3   3   18.00    1.10
   6   3  -3   17.30    1.00
   5  -3  -3  242.48    6.50
   5  -3  -3  220.78    6.60
   5  -3  -3  230.68    6.40
   5  -3  -3  220.38    6.60
   5   3  -3  233.68    6.70
   5   3  -3  245.18    6.40
   5   3  -3  235.48    6.70
   5   3  -3  234.68    6.50
  -5   3   3  236.88    6.80
   5   3  -3  231.48    6.40
  -5   3   3  241.88    6.80
   4  -3  -3   32.40    1.30
  -4  -3   3   33.80    1.30
   4  -3  -3   31.60    1.30
   4  -3  -3   33.20    1.50
   4  -3  -3   33.90    1.40
   4   3  -3   36.80    1.50
   4   3  -3   34.10    1.20
   4   3  -3   33.10    1.20
   4   3  -3   32.90    1.20
  -4   3   3   34.00    1.40
  -4   3   3   33.00    1.10
   4   3  -3   34.20    1.30
  -4   3   3   33.60    1.40
   4   3  -3   33.10    1.40
   3  -3  -3   34.30    1.30
  -3  -3   3   32.70    1.20
   3  -3  -3   31.70    1.20
   3  -3  -3   32.50    1.20
   3  -3  -3   31.10    1.40
  -3   3   3   31.80    1.10
   3   3  -3   33.50    1.30
   3   3  -3   34.00    1.20
  -3   3   3   33.20    1.40
   3   3  -3   32.00    1.30
  -3   3   3   32.10    1.40
   3   3  -3   32.60    1.10
   3   3  -3   34.40    1.20
  -2  -3   3   28.10    0.90
  -2  -3   3   27.90    1.10
   2  -3  -3   28.00    1.00
   2  -3  -3   26.40    1.10
   2  -3  -3   28.20    1.10
   2  -3  -3   25.70    1.20
  -2   3   3   26.20    1.20
  -2   3   3   26.90    1.00
   2   3  -3   28.60    0.90
   2   3  -3   29.40    1.10
   2   3  -3   28.00    1.00
   2   3  -3   27.10    1.10
   2   3  -3   27.10    1.00
  -2   3   3   26.30    1.10
  -1  -3   3  127.39    3.40
   1  -3  -3  129.39    3.80
  -1  -3   3  130.59    3.40
   1  -3  -3  130.79    3.70
  -1  -3   3  129.89    3.50
  -1  -3   3  129.89    3.60
  -1  -3   3  126.69    3.70
   1  -3  -3  123.79    3.50
   1   3  -3  130.49    3.40
  -1   3   3  131.39    3.70
  -1   3   3  133.39    3.80
   1   3  -3  126.79    3.60
  -1   3   3  123.39    3.70
   1   3  -3  133.99    3.70
   1   3  -3  130.59    3.70
   1   3  -3  133.19    3.70
   1   3  -3  126.89    3.70
   0  -3  -3  256.87    6.80
   0  -3   3  243.88    6.50
   0  -3   3  245.68    6.90
   0  -3  -3  256.77    6.70
   0  -3  -3  252.67    6.80
   0  -3   3  238.98    6.80
   0  -3   3  242.18    6.70
   0  -3  -3  263.47    6.90
   0   3  -3  252.87    6.70
   0   3   3  250.07    6.60
   0   3  -3  243.38    6.60
   0   3  -3  244.28    6.70
   0   3   3  245.58    6.80
   0   3   3  252.37    6.70
   0   3  -3  239.68    6.70
   0   3  -3  237.68    6.70
   1  -3   3   33.90    1.30
   1  -3   3   32.70    1.30
   1  -3   3   33.80    1.10
  -1  -3  -3   35.50    1.20
  -1  -3  -3   35.40    1.30
  -1  -3  -3   32.30    1.00
   1  -3   3   33.50    1.30
  -1  -3  -3   35.50    1.40
   1   3   3   33.80    1.20
  -1   3  -3   36.20    1.30
   1   3   3   33.70    1.00
  -1   3  -3   35.40    1.30
  -1   3  -3   33.20    1.20
   1   3   3   33.20    1.40
  -1   3  -3   33.90    1.20
   1   3   3   31.30    1.00
   2  -3   3   45.70    1.80
  -2  -3  -3   48.80    1.60
  -2  -3  -3   45.60    1.60
   2  -3   3   47.00    1.70
   2  -3   3   47.20    1.70
   2  -3   3   46.70    1.60
  -2   3  -3   44.10    1.60
   2   3   3   46.50    1.60
   2   3   3   48.00    1.40
  -2   3  -3   46.40    1.50
  -2   3  -3   48.50    1.60
   2   3   3   44.70    1.70
   3  -3   3   39.10    1.60
   3  -3   3   40.00    1.70
  -3  -3  -3   39.20    1.70
  -3  -3  -3   38.10    1.40
   3  -3   3   42.30    1.60
   3  -3   3   39.30    1.50
   3   3   3   36.30    1.70
   3   3   3   40.10    1.40
  -3   3  -3   40.80    1.60
  -3   3  -3   42.10    1.60
  -3   3  -3   38.30    1.40
   3   3   3   40.10    1.60
   3   3   3   41.50    1.20
   3   3   3   41.20    1.40
   4  -3   3   29.90    1.40
  -4  -3  -3   31.80    1.20
  -4  -3  -3   30.80    1.50
   4  -3   3   32.00    1.40
   4  -3   3   28.50    1.40
   4  -3   3   27.20    1.50
  -4   3  -3   29.60    1.40
   4   3   3   31.40    1.20
   4   3   3   33.10    1.60
  -4   3  -3   30.90    1.40
   4   3   3   32.70    1.20
  -4   3  -3   29.60    1.20
   4   3   3   32.90    1.10
   4   3   3   33.40    1.50
  -5  -3  -3   45.60    2.10
  -5  -3  -3   41.50    1.50
   5  -3   3   44.00    1.80
   5  -3   3   45.80    1.80
   5  -3   3   41.00    1.80
   5  -3   3   41.70    2.00
   5   3   3   43.80    1.60
   5   3   3   40.90    2.00
   5   3   3   42.40    1.90
  -5   3  -3   44.80    1.90
   5   3   3   47.50    1.60
  -5   3  -3   46.40    1.90
  -5   3  -3   46.50    1.80
  -5   3  -3   42.20    1.60
  -6  -3  -3   68.39    2.80
   6  -3   3   66.89    2.60
   6  -3   3   64.89    2.70
   6  -3   3   62.19    2.40
   6  -3   3   66.79    2.50
  -6   3  -3   63.49    2.40
   6   3   3   64.29    2.20
   6   3   3   67.09    2.70
  -6   3  -3   62.39    2.20
   6   3   3   66.49    2.50
  -6   3  -3   64.89    2.60
  -7  -3  -3    8.40    1.20
   7  -3   3    7.40    0.90
   7  -3   3    8.40    1.20
   7  -3   3    7.70    0.90
   7  -3   3    8.60    1.10
   7   3   3    8.20    1.10
   7   3   3   10.60    1.20
   7   3   3    7.40    0.90
  -7   3  -3    8.20    0.80
   7   3   3    8.00    0.80
  -7   3  -3    7.30    0.90
  -7   3  -3    8.80    1.10
   8  -3   3    5.40    1.00
   8  -3   3    5.20    1.00
   8  -3   3    3.70    1.00
   8  -3   3    4.10    0.70
   8  -3   3    5.60    0.80
  -8  -3  -3    3.70    1.00
   8   3   3    5.50    0.70
   8   3   3    5.50    0.70
   8   3   3    4.20    0.80
   8   3   3    3.60    1.00
  -8   3  -3    4.70    0.70
   8   3   3    5.60    1.00
  -8   3  -3    4.30    0.80
  -8   3  -3    5.70    1.00
   9  -3   3   17.80    1.70
   9  -3   3   15.70    1.20
   9  -3   3   18.10    1.40
   9  -3   3   16.40    1.70
   9  -3   3   18.60    1.70
  -9   3  -3   18.70    1.60
   9   3   3   17.00    1.70
   9   3   3   18.20    1.40
   9   3   3   18.50    1.80
   9   3   3   17.10    1.20
   9   3   3   16.80    1.10
  10  -3   3   10.80    1.40
  10  -3   3    8.30    1.10
  10  -3   3   10.00    1.50
  10  -3   3    7.90    1.30
  10   3   3   12.30    1.30
  10   3   3   10.80    1.00
  10   3   3    9.10    1.40
  10   3   3   11.00    1.00
  10   3   3   11.60    1.60
  11  -3   3    0.80    0.80
  11  -3   3    2.90    1.10
  11  -3   3    1.40    1.00
  11  -3   3    2.30    0.80
  11   3   3    1.20    0.90
  11   3   3    3.80    1.10
  11   3   3    1.60    0.60
  12  -3   3    0.90    0.80
  12  -3   3    1.00    1.10
  12  -3   3    0.20    0.90
  12  -3   3   -0.20    0.90
  12   3   3    0.00    0.50
  12   3   3   -0.60    0.70
  12   3   3    1.10    1.00
  13  -3   3    2.30    1.10
  13  -3   3    1.20    1.00
  13  -3   3    2.20    1.20
  13   3   3    0.60    1.10
  13   3   3    2.00    1.20
  14  -4  -3    2.60    1.20
  14  -4  -3    1.70    1.10
  14  -4  -3    0.80    1.00
  14   4  -3    1.80    1.10
  14   4  -3    3.40    1.20
  13  -4  -3    1.10    1.00
  13  -4  -3    0.20    0.90
  13  -4  -3    0.70    1.00
  13  -4  -3   -0.40    0.80
  13   4  -3   -0.10    0.90
  13   4  -3    1.70    1.00
  12  -4  -3    1.20    0.90
  12  -4  -3   -1.10    0.70
  12  -4  -3    0.40    0.80
  12  -4  -3    1.90    0.90
 -12   4   3    0.40    0.70
  12   4  -3    0.50    0.80
  12   4  -3    0.60    0.80
  11  -4  -3    3.20    1.00
  11  -4  -3    4.50    1.10
  11  -4  -3    3.90    1.00
  11  -4  -3    3.80    1.00
  11   4  -3    5.40    1.00
 -11   4   3    4.20    0.90
  11   4  -3    3.80    1.00
  11   4  -3    3.60    1.00
  10  -4  -3    7.40    1.20
  10  -4  -3    5.80    1.00
  10  -4  -3    6.20    1.10
  10  -4  -3    6.90    1.10
  10   4  -3    5.70    1.00
  10   4  -3    6.40    1.10
 -10   4   3    7.30    1.10
  10   4  -3    6.10    1.00
   9  -4  -3    6.00    0.90
   9  -4  -3    2.90    0.90
   9  -4  -3    5.20    1.00
   9  -4  -3    4.80    0.90
  -9   4   3    4.80    0.90
   9   4  -3    3.80    0.90
   9   4  -3    5.50    0.80
   9   4  -3    6.00    0.90
   9   4  -3    5.00    0.50
   8  -4  -3   37.50    2.00
   8  -4  -3   36.20    2.00
   8  -4  -3   41.70    1.90
   8  -4  -3   33.90    1.80
   8   4  -3   39.90    1.60
   8   4  -3   38.60    1.40
   8   4  -3   37.40    1.80
   8   4  -3   37.50    1.30
  -8   4   3   36.00    1.90
   8   4  -3   38.00    1.90
   8   4  -3   40.70    2.00
   7  -4  -3   98.49    3.50
   7  -4  -3   99.29    3.60
   7  -4  -3  102.09    3.40
   7  -4  -3   98.39    3.30
   7   4  -3  108.39    3.50
   7   4  -3   96.79    3.40
   7   4  -3  100.19    3.00
   7   4  -3   99.69    2.90
   7   4  -3  101.49    3.30
   7   4  -3  100.49    3.10
  -7   4   3  100.59    3.50
   7   4  -3   97.49    2.90
   6  -4  -3   99.89    3.40
   6  -4  -3  103.09    3.50
   6  -4  -3   98.19    3.20
   6  -4  -3  100.89    3.30
   6   4  -3  103.29    3.20
  -6   4   3  106.19    3.50
   6   4  -3  100.29    3.40
   6   4  -3  103.49    3.00
   6   4  -3  101.99    3.40
   6   4  -3  104.29    2.90
  -6   4   3  100.69    3.40
   5  -4  -3   79.79    2.90
   5  -4  -3   80.69    2.80
  -5  -4   3   78.39    2.70
   5  -4  -3   78.69    2.60
   5  -4  -3   78.39    2.70
   5   4  -3   78.59    2.30
  -5   4   3   79.29    2.80
  -5   4   3   77.39    2.70
   5   4  -3   82.09    2.40
   5   4  -3   83.49    2.70
   5   4  -3   76.89    2.70
   5   4  -3   77.49    2.60
   5   4  -3   80.19    2.50
  -4  -4   3    4.70    0.50
   4  -4  -3    4.30    0.50
   4  -4  -3    4.90    0.70
   4  -4  -3    4.70    0.60
   4  -4  -3    5.60    0.60
   4   4  -3    5.00    0.40
  -4   4   3    5.20    0.60
   4   4  -3    5.10    0.50
   4   4  -3    7.10    0.70
   4   4  -3    4.50    0.40
   4   4  -3    4.50    0.50
  -4   4   3    6.20    0.70
   3  -4  -3  247.58    6.60
   3  -4  -3  239.28    6.70
   3  -4  -3  243.38    6.90
   3  -4  -3  239.78    6.70
  -3  -4   3  238.18    6.60
   3   4  -3  245.08    6.60
  -3   4   3  250.77    6.90
   3   4  -3  247.38    6.60
  -3   4   3  242.48    6.60
   3   4  -3  238.28    6.70
  -3   4   3  248.88    6.90
   3   4  -3  236.48    6.60
   3   4  -3  255.57    6.80
   2  -4  -3   18.60    0.90
  -2  -4   3   20.30    1.00
  -2  -4   3   19.00    0.80
   2  -4  -3   18.60    0.80
   2  -4  -3   18.90    1.00
   2  -4  -3   19.30    0.90
   2   4  -3   18.30    0.80
   2   4  -3   18.50    0.70
   2   4  -3   19.90    0.90
   2   4  -3   18.70    1.00
  -2   4   3   18.50    1.00
   2   4  -3   19.90    0.80
  -2   4   3   17.30    0.80
  -2   4   3   19.10    0.90
   2   4  -3   20.10    0.80
  -1  -4   3  176.68    4.80
   1  -4  -3  167.28    4.70
   1  -4  -3  186.98    4.80
  -1  -4   3  170.38    4.70
  -1  -4   3  172.68    4.80
   1  -4  -3  166.88    5.00
   1  -4  -3  180.58    4.90
  -1  -4   3  173.78    4.90
   1  -4  -3  169.68    5.00
   1   4  -3  171.08    4.70
   1   4  -3  171.08    4.80
   1   4  -3  168.08    4.70
  -1   4   3  171.98    4.80
  -1   4   3  167.78    4.70
   1   4  -3  170.48    4.60
  -1   4   3  164.68    4.80
   1   4  -3  169.48    4.80
   0  -4  -3    8.60    0.50
   0  -4   3    9.10    0.70
   0  -4  -3    7.70    0.60
   0  -4  -3    8.50    0.70
   0  -4   3    8.80    0.60
   0  -4  -3    8.60    0.60
   0  -4   3    8.70    0.70
   0   4   3    8.20    0.60
   0   4   3    8.50    0.70
   0   4   3    8.40    0.50
   0   4  -3    8.50    0.60
   0   4  -3    7.90    0.50
   0   4  -3    9.60    0.60
   0   4  -3    8.80    0.60
   0   4  -3    8.40    0.70
  -1  -4  -3   23.10    0.90
   1  -4   3   25.90    1.20
   1  -4   3   22.50    0.90
   1  -4   3   24.70    1.10
  -1  -4  -3   25.90    1.20
   1  -4   3   23.70    1.10
   1   4   3   26.00    1.20
   1   4   3   26.30    0.90
   1   4   3   24.80    1.10
  -1   4  -3   27.80    1.10
  -1   4  -3   29.30    1.20
  -1   4  -3   25.60    1.10
  -1   4  -3   25.20    1.00
   2  -4   3    5.10    0.60
  -2  -4  -3    5.10    0.50
  -2  -4  -3    5.50    0.50
   2  -4   3    5.10    0.50
   2  -4   3    4.50    0.60
   2  -4   3    5.00    0.60
  -2  -4  -3    5.50    0.70
  -2   4  -3    5.20    0.60
   2   4   3    4.00    0.40
  -2   4  -3    4.60    0.50
  -2   4  -3    5.30    0.50
  -2   4  -3    4.30    0.50
   2   4   3    5.00    0.60
   3  -4   3   44.50    1.60
   3  -4   3   44.20    1.90
   3  -4   3   47.00    1.80
  -3  -4  -3   43.80    1.50
   3  -4   3   43.70    1.70
  -3  -4  -3   39.20    1.80
   3   4   3   41.70    1.80
   3   4   3   43.00    1.50
  -3   4  -3   42.90    1.70
  -3   4  -3   43.70    1.70
   3   4   3   41.60    1.70
   3   4   3   45.50    1.50
   3   4   3   41.60    1.30
  -3   4  -3   42.50    1.60
   4  -4   3   26.70    1.40
   4  -4   3   26.20    1.30
   4  -4   3   26.80    1.30
   4  -4   3   26.80    1.50
  -4  -4  -3   25.30    1.00
  -4  -4  -3   31.10    1.50
  -4   4  -3   25.80    1.20
  -4   4  -3   26.20    1.30
   4   4   3   26.20    1.00
   4   4   3   27.50    1.50
   4   4   3   27.40    1.40
   4   4   3   26.80    1.10
  -4   4  -3   27.00    1.30
   4   4   3   27.90    1.10
   5  -4   3   75.69    2.70
   5  -4   3   69.79    2.60
  -5  -4  -3   75.89    2.90
   5  -4   3   68.29    2.80
   5  -4   3   71.79    2.60
  -5  -4  -3   75.09    2.30
   5   4   3   81.39    2.80
  -5   4  -3   73.89    2.70
   5   4   3   76.29    2.30
  -5   4  -3   69.99    2.70
   5   4   3   80.79    2.40
   5   4   3   76.79    2.30
  -5   4  -3   73.39    2.50
   5   4   3   73.39    2.90
  -5   4  -3   77.49    2.70
  -6  -4  -3    7.40    1.10
   6  -4   3    4.80    0.70
   6  -4   3    4.70    0.70
   6  -4   3    4.60    0.80
   6  -4   3    4.60    0.90
   6   4   3    6.50    0.90
  -6   4  -3    5.80    0.90
   6   4   3    6.80    0.60
  -6   4  -3    4.40    0.70
   6   4   3    6.00    0.50
   6   4   3    7.40    0.90
  -6   4  -3    6.20    0.70
   7  -4   3  113.89    3.90
   7  -4   3  117.89    4.30
   7  -4   3  117.49    4.00
   7  -4   3  109.29    3.70
  -7  -4  -3  110.89    4.30
  -7   4  -3  109.59    3.90
  -7   4  -3  109.69    3.60
   7   4   3  106.29    4.00
   7   4   3  109.59    3.40
   7   4   3  109.99    4.10
  -7   4  -3  115.89    3.80
   7   4   3  113.19    3.80
   8  -4   3   52.69    2.40
   8  -4   3   52.29    2.70
   8  -4   3   50.19    2.20
  -8  -4  -3   55.19    2.80
   8  -4   3   52.09    2.50
   8  -4   3   52.19    2.60
  -8   4  -3   54.69    2.40
   8   4   3   50.89    2.30
   8   4   3   52.09    2.00
  -8   4  -3   50.69    2.10
   8   4   3   50.09    2.50
   8   4   3   53.39    1.90
  -8   4  -3   49.10    2.50
   8   4   3   52.79    2.70
   9  -4   3   35.10    2.20
   9  -4   3   41.50    2.50
   9  -4   3   41.80    2.40
  -9  -4  -3   39.50    2.50
   9  -4   3   39.00    2.20
   9  -4   3   41.00    1.90
   9   4   3   36.80    1.70
  -9   4  -3   39.10    1.90
   9   4   3   43.80    2.50
   9   4   3   41.00    2.10
   9   4   3   39.00    2.30
  -9   4  -3   41.80    2.30
   9   4   3   41.50    1.70
  10  -4   3    3.80    0.90
  10  -4   3    3.70    1.20
  10  -4   3    6.80    1.20
  10  -4   3    6.00    1.20
  10   4   3    5.70    0.70
  10   4   3    5.10    0.90
  10   4   3    6.30    1.30
  10   4   3    5.20    1.10
  11  -4   3    5.40    1.10
  11  -4   3    6.30    1.30
  11  -4   3    6.60    1.30
  11  -4   3    4.90    1.20
  11   4   3    4.80    1.20
  11   4   3    3.90    1.20
  11   4   3    4.10    0.70
  12  -4   3    1.00    1.00
  12  -4   3    0.70    0.80
  12  -4   3    0.30    0.90
  12  -4   3    0.40    1.00
  12   4   3    0.40    0.50
  12   4   3    1.10    0.90
  12   4   3    2.40    1.10
  13  -5  -3   16.70    2.00
  13  -5  -3   17.90    1.90
  13  -5  -3   20.60    2.10
  13  -5  -3   21.00    2.10
  13   5  -3   16.50    1.90
  13   5  -3   15.70    1.80
 -13   5   3   18.90    1.90
  12  -5  -3    5.40    1.10
  12  -5  -3    7.00    1.30
  12  -5  -3    5.20    1.10
  12  -5  -3    4.50    1.20
  12   5  -3    4.70    1.10
  12   5  -3    6.60    1.30
 -12   5   3    4.90    1.10
  11  -5  -3   13.40    1.50
  11  -5  -3   15.40    1.50
  11  -5  -3   15.20    1.70
  11  -5  -3   13.20    1.60
 -11   5   3   16.90    1.70
  11   5  -3   14.00    1.60
  11   5  -3   17.20    1.70
  10  -5  -3    8.40    1.30
  10  -5  -3    7.70    1.10
  10  -5  -3    8.80    1.20
  10  -5  -3    6.30    1.20
  10   5  -3    7.60    1.20
 -10   5   3   10.50    1.30
  10   5  -3   10.70    1.20
  10   5  -3    8.60    1.20
   9  -5  -3    2.30    0.80
   9  -5  -3    1.80    0.70
   9  -5  -3    2.30    0.80
   9  -5  -3    2.20    0.90
   9   5  -3    2.30    0.70
   9   5  -3    1.10    0.70
   9   5  -3    2.70    0.80
   9   5  -3    1.20    0.30
  -9   5   3    2.30    0.80
   8  -5  -3   11.10    1.10
   8  -5  -3   14.60    1.40
   8  -5  -3   15.70    1.30
   8  -5  -3   14.20    1.30
   8   5  -3   14.80    1.00
   8   5  -3   14.60    1.20
   8   5  -3   13.80    1.20
   8   5  -3   13.70    1.10
  -8   5   3   13.30    1.30
   8   5  -3   13.50    0.70
   7  -5  -3    3.20    0.70
   7  -5  -3    3.30    0.70
   7  -5  -3    3.40    0.70
   7  -5  -3    2.40    0.60
   7   5  -3    4.20    0.70
   7   5  -3    3.80    0.60
[truncated: 937,787 more chars]
